# Supplementary material for: Structural model of microtubule dynamics inhibition by kinesin-4 from the crystal structure of KLP-12 –tubulin complex
Source: eLife journal article supplement (doi:10.7554/elife.77877), 2022-08-01

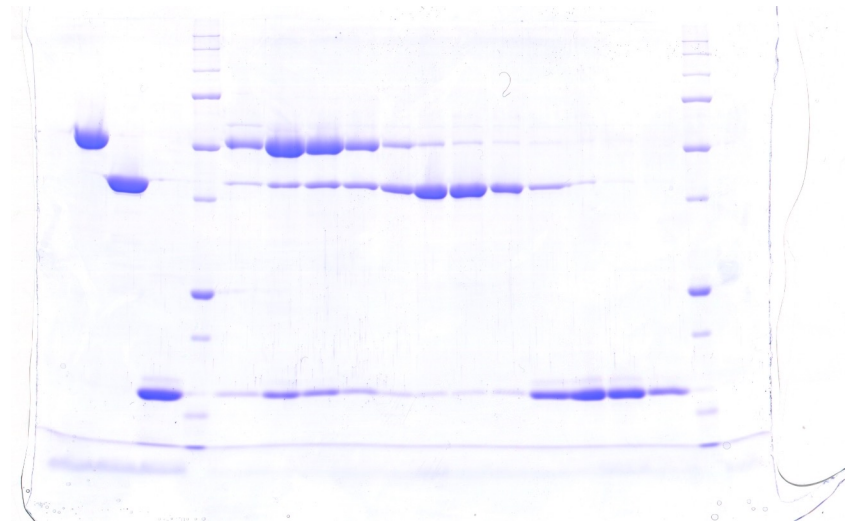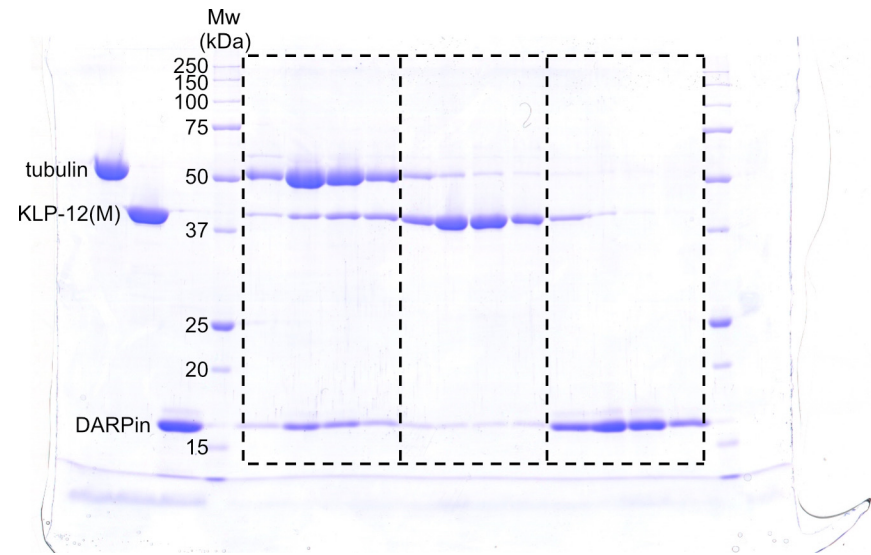

Supplement: fig3-data5 [file elife-77877-fig3-data5-v1.pdf]
