# Supplementary material for: Structural model of microtubule dynamics inhibition by kinesin-4 from the crystal structure of KLP-12 –tubulin complex
Source: eLife. 2022 Sep 6;11:e77877. doi: 10.7554/eLife.77877 (PMC9451533; doi:10.7554/eLife.77877)
Supplement: Figure 1—source data 1. [file elife-77877-fig1-data1.xlsx]

## Sheet: Sheet1
	WT	KLP-12_OE
	514.278	80.797
	485.83	134.416
	416.901	143.548
	375.649	104.885
	488.937	67.223
	432.899	214.841
	507.894	233.533
	514.948	134.413
	515.421	163.767
	574.35	183.578
		152.033
		144.913
mean	482.711	146.496
SD	58.1764	49.1618
P value*		< 0.0001
*Unpaired t test with Welch’s correction
