# Supplementary material for: Structural model of microtubule dynamics inhibition by kinesin-4 from the crystal structure of KLP-12 –tubulin complex
Source: eLife. 2022 Sep 6;11:e77877. doi: 10.7554/eLife.77877 (PMC9451533; doi:10.7554/eLife.77877)
Supplement: Figure 2—figure supplement 1—source data 1. [file elife-77877-fig2-figsupp1-data1.xlsx]

## Sheet: Sheet1
This study
KLP12 (nM)	0	30	60	120	300
growth rate (μm/min)	1.19	1.002	0.9621	0.8877	0.7723
growth ratio	1	0.842017	0.808487	0.745966	0.648992
van der Vaart et al., 2013
KIF21A (nM)	0	100	200	300	600
growth rate (μm/min)	1.29	1.2	0.89	0.83	0.63
growth ratio	1	0.930233	0.689922	0.643411	0.488372
Yue et al., 2018
KIF7 (nM)	0	20	40	80
growth rate (μm/min)	1.11	0.4	0.29	0.33
growth ratio	1	0.36036	0.261261	0.297297
KIF27 (nM)	0	90	180
growth rate (μm/min)	1.11	0.6	0.29
growth ratio	1	0.540541	0.261261
Bieling et al., 2010
Xklp1 (nM)	0	150	300	450	600
growth rate (μm/min)	2.4	1.58	1.18	0.55	0.23
growth ratio	1	0.658333	0.491667	0.229167	0.0958333
(nM)	0	20	30	40	60	80	90	100	120	150	180	200	300	450	600
KLP12	1		0.84		0.81				0.75				0.65
KIF21A	1							0.9302				0.6899	0.6434		0.4884
KIF7	1	0.36036		0.261261		0.297297
KIF27	1						0.540541				0.261261
Xklp1	1									0.658333			0.491667	0.229167	0.0958333
