# Supplementary material for: Structural model of microtubule dynamics inhibition by kinesin-4 from the crystal structure of KLP-12 –tubulin complex
Source: eLife. 2022 Sep 6;11:e77877. doi: 10.7554/eLife.77877 (PMC9451533; doi:10.7554/eLife.77877)
Supplement: Figure 2—source data 1. [file elife-77877-fig2-data1.xlsx]

## Sheet: Fig2C
Taxol MTs	dynamic MTs
407	215	n
0.045	0.063	min
2.09	2.09	max
2.05	2.03	range
0.81	0.82	mean
0.32	0.31	SD
0.016	0.021	SEM

## Sheet: Fig2D
Taxol MTs	dynamic MTs
407	197	n
0.1	0.21	min
9.38	4.58	max
9.27	4.37	range
1.3	1.11	mean
0.89	0.57	SD
0.044	0.04	SEM

## Sheet: Fig2F
0	30 nM	60 nM	120 nM	300 nM
52	52	52	52	52	n
0.65	0.23	0.41	0.11	0.32	min
2.1	1.71	1.69	1.51	1.13	max
1.45	1.48	1.28	1.4	0.81	range
1.19	1.002	0.9621	0.8877	0.7723	mean
0.3556	0.2864	0.2622	0.2552	0.1863	SD
0.04932	0.03972	0.03637	0.0354	0.02583	SEM

## Sheet: Fig2G
0	30	60	120	300
30	30	30	30	30	n
11.3	12.1	14.3	14.5	14.5	min
24.2	23.1	23.6	23.7	22.4	max
12.9	11	9.3	9.2	7.9	range
19.31	18.56	18.87	18.29	19.18	mean
2.7	2.52	2.25	2.34	1.79	SD
0.49	0.46	0.41	0.42	0.32	SEM

## Sheet: Fig2H
0 nM	30 nM	60 nM	120 nM	300 nM
99	99	99	99	99	n
0	0	0	0	0	Min
0.5	0.5	0.5	0.4	0.4	Max
0.5	0.5	0.5	0.4	0.4	Range
0.34	0.32	0.32	0.23	0.2	Mean
0.11	0.092	0.079	0.089	0.075	SD
0.011	0.0092	0.0079	0.0089	0.0075	SEM

## Sheet: Fig2I
0 nM	30 nM	60 nM	120 nM	300 nM
101	101	101	101	101	n
0	0	0	0	0	min
0.55	0.55	0.55	0.45	0.4	max
0.55	0.55	0.55	0.45	0.4	range
0.35	0.35	0.32	0.29	0.23	mean
0.1	0.1	0.099	0.074	0.09	SD
0.01	0.01	0.0098	0.0074	0.009	SEM
