# Supplementary material for: Structural model of microtubule dynamics inhibition by kinesin-4 from the crystal structure of KLP-12 –tubulin complex
Source: eLife. 2022 Sep 6;11:e77877. doi: 10.7554/eLife.77877 (PMC9451533; doi:10.7554/eLife.77877)
Supplement: Figure 3—figure supplement 1—source data 2. [file elife-77877-fig3-figsupp1-data2.xlsx]

## Sheet: Pi standard
Pi Conc. (μM)	OD360
0	0
25	0.2537
50	0.5112
100	0.9484

## Sheet: 100Tu_LZ
Time (sec)	BG_OD360	1st_OD360	1st_ΔPi con. (μM)	2nd_OD360	2nd_ΔPi con. (μM)	3rd_OD360	3rd_ΔPi con. (μM)
	0.16	0.042		0.124		0.091
5	0.173	0.054	-14	0.142	-4.73684	0.117	-7.36842
10	0.186	0.063	-14.4211	0.158	-4.42105	0.139	-6.42105
15	0.198	0.074	-14.5263	0.173	-4.10526	0.159	-5.57895
20	0.209	0.093	-13.6842	0.189	-3.57895	0.179	-4.63158
25	0.215	0.095	-14.1053	0.197	-3.36842	0.195	-3.57895
30	0.225	0.103	-14.3158	0.209	-3.15789	0.208	-3.26316
35	0.231	0.111	-14.1053	0.217	-2.94737	0.223	-2.31579
40	0.243	0.12	-14.4211	0.222	-3.68421	0.236	-2.21053
45	0.245	0.127	-13.8947	0.229	-3.15789	0.244	-1.57895
50	0.25	0.133	-13.7895	0.234	-3.15789	0.252	-1.26316
55	0.253	0.14	-13.3684	0.24	-2.84211	0.261	-0.631579
60	0.257	0.145	-13.2632	0.245	-2.73684	0.266	-0.526316
65	0.258	0.15	-12.8421	0.249	-2.42105	0.275	0.315789
70	0.265	0.157	-12.8421	0.25	-3.05263	0.277	-0.210526
75	0.267	0.162	-12.5263	0.25	-3.26316	0.283	0.210526
80	0.268	0.17	-11.7895	0.252	-3.15789	0.288	0.631579
85	0.27	0.174	-11.5789	0.255	-3.05263	0.29	0.631579
90	0.271	0.179	-11.1579	0.254	-3.26316	0.293	0.842105
95	0.275	0.184	-11.0526	0.258	-3.26316	0.298	0.947368
100	0.27	0.187	-10.2105	0.262	-2.31579	0.299	1.57895
105	0.274	0.193	-10	0.262	-2.73684	0.3	1.26316
110	0.276	0.195	-10	0.26	-3.15789	0.301	1.15789
115	0.276	0.199	-9.57895	0.262	-2.94737	0.306	1.68421
120	0.276	0.202	-9.26316	0.261	-3.05263	0.305	1.57895
125	0.28	0.207	-9.15789	0.264	-3.15789	0.306	1.26316
130	0.279	0.211	-8.63158	0.262	-3.26316	0.307	1.47368
135	0.279	0.212	-8.52632	0.265	-2.94737	0.308	1.57895
140	0.279	0.215	-8.21053	0.261	-3.36842	0.308	1.57895
145	0.278	0.22	-7.57895	0.262	-3.15789	0.308	1.68421
150	0.283	0.222	-7.89474	0.259	-4	0.307	1.05263
155	0.282	0.225	-7.47368	0.26	-3.78947	0.31	1.47368
160	0.283	0.225	-7.57895	0.262	-3.68421	0.308	1.15789
165	0.279	0.23	-6.63158	0.264	-3.05263	0.308	1.57895
170	0.28	0.234	-6.31579	0.264	-3.15789	0.307	1.36842
175	0.281	0.239	-5.89474	0.263	-3.36842	0.306	1.15789
180	0.282	0.241	-5.78947	0.263	-3.47368	0.31	1.47368
185	0.28	0.242	-5.47368	0.263	-3.26316	0.309	1.57895
190	0.281	0.246	-5.15789	0.262	-3.47368	0.31	1.57895
195	0.281	0.248	-4.94737	0.26	-3.68421	0.307	1.26316
200	0.28	0.251	-4.52632	0.259	-3.68421	0.309	1.57895
205	0.283	0.255	-4.42105	0.261	-3.78947	0.311	1.47368
210	0.279	0.258	-3.68421	0.261	-3.36842	0.308	1.57895
215	0.281	0.262	-3.47368	0.262	-3.47368	0.31	1.57895
220	0.28	0.265	-3.05263	0.262	-3.36842	0.309	1.57895
225	0.283	0.266	-3.26316	0.262	-3.68421	0.307	1.05263
230	0.281	0.268	-2.84211	0.261	-3.57895	0.309	1.47368
235	0.282	0.269	-2.84211	0.264	-3.36842	0.309	1.36842
240	0.28	0.274	-2.10526	0.265	-3.05263	0.306	1.26316
245	0.28	0.276	-1.89474	0.261	-3.47368	-0.821	-117.368
250	0.281	0.279	-1.68421	-0.805	-115.789	-0.822	-117.579
255	0.284	0.28	-1.89474	-0.804	-116	-0.66	-100.842
260	0.282	0.283	-1.36842	0.213	-8.73684	0.275	-2.21053
265	0.283	0.285	-1.26316	0.228	-7.26316	0.281	-1.68421
270	0.282	0.29	-0.631579	0.236	-6.31579	0.282	-1.47368
275	0.283	0.289	-0.842105	0.243	-5.68421	0.282	-1.57895
280	0.283	0.295	-0.210526	0.242	-5.78947	0.283	-1.47368
285	0.282	0.296	1.27822e-15	0.244	-5.47368	0.284	-1.26316
290	0.281	0.3	0.526316	0.245	-5.26316	0.282	-1.36842
295	0.281	0.3	0.526316	0.248	-4.94737	0.282	-1.36842
300	0.282	0.303	0.736842	0.246	-5.26316	0.282	-1.47368
305	0.282	0.306	1.05263	0.245	-5.36842	0.281	-1.57895
310	0.282	0.31	1.47368	0.25	-4.84211	0.283	-1.36842
315	0.281	0.309	1.47368	0.25	-4.73684	0.284	-1.15789
320	0.284	0.309	1.15789	0.252	-4.84211	0.286	-1.26316
325	0.283	0.313	1.68421	0.256	-4.31579	0.286	-1.15789
330	0.283	0.317	2.10526	0.253	-4.63158	0.286	-1.15789
335	0.281	0.317	2.31579	0.255	-4.21053	0.286	-0.947368
340	0.282	0.317	2.21053	0.258	-4	0.288	-0.842105
345	0.286	0.319	2	0.257	-4.52632	0.288	-1.26316
350	0.281	0.321	2.73684	0.26	-3.68421	0.29	-0.526316
355	0.284	0.325	2.84211	0.26	-4	0.291	-0.736842
360	0.283	0.323	2.73684	0.264	-3.47368	0.293	-0.421053
365	0.282	-0.807	-116.105	0.265	-3.26316	0.293	-0.315789
370	0.281	-0.809	-116.211	0.266	-3.05263	0.293	-0.210526
375	0.281	0.247	-5.05263	0.268	-2.84211	0.295	-4.56506e-15
380	0.283	0.251	-4.84211	0.269	-2.94737	0.297	1.27822e-15
385	0.284	0.257	-4.31579	0.271	-2.84211	0.298	1.27822e-15
390	0.285	0.259	-4.21053	0.273	-2.73684	0.299	1.27822e-15
395	0.285	0.263	-3.78947	0.272	-2.84211	0.301	0.210526
400	0.282	0.269	-2.84211	0.276	-2.10526	0.3	0.421053
405	0.281	0.27	-2.63158	0.274	-2.21053	0.305	1.05263
410	0.285	0.276	-2.42105	0.278	-2.21053	0.302	0.315789
415	0.283	0.277	-2.10526	0.279	-1.89474	0.305	0.842105
420	0.284	0.282	-1.68421	0.282	-1.68421	0.306	0.842105
425	0.283	0.282	-1.57895	0.281	-1.68421	0.309	1.26316
430	0.284	0.283	-1.57895	0.285	-1.36842	0.308	1.05263
435	0.281	0.289	-0.631579	0.287	-0.842105	0.309	1.47368
440	0.282	0.288	-0.842105	0.286	-1.05263	0.312	1.68421
445	0.281	0.293	-0.210526	0.288	-0.736842	0.313	1.89474
450	0.284	0.293	-0.526316	0.289	-0.947368	0.314	1.68421
455	0.283	0.295	-0.210526	0.291	-0.631579	0.313	1.68421
460	0.283	0.295	-0.210526	0.293	-0.421053	0.313	1.68421
465	0.283	0.309	1.26316	0.293	-0.421053	0.315	1.89474
470	0.283	0.297	1.27822e-15	0.296	-0.105263	0.315	1.89474
475	0.285	0.297	-0.210526	0.297	-0.210526	0.318	2
480	0.284	0.3	0.210526	0.297	-0.105263	0.319	2.21053
485	0.283	0.301	0.421053	0.3	0.315789	0.319	2.31579
490	0.284	0.301	0.315789	0.303	0.526316	0.319	2.21053
495	0.282	0.304	0.842105	0.302	0.631579	0.321	2.63158
500	0.282	0.301	0.526316	0.303	0.736842	0.322	2.73684
505	0.279	0.302	0.947368	0.3	0.736842	0.321	2.94737
510	0.281	0.303	0.842105	0.305	1.05263	0.324	3.05263
515	0.282	0.301	0.526316	0.305	0.947368	0.323	2.84211
520	0.28	0.302	0.842105	0.308	1.47368	0.325	3.26316
525	0.279	0.302	0.947368	0.309	1.68421	0.324	3.26316
530	0.28	0.301	0.736842	0.31	1.68421	0.326	3.36842
535	0.281	0.301	0.631579	0.312	1.78947	0.326	3.26316
540	0.279	0.301	0.842105	0.311	1.89474	0.327	3.57895
545	0.282	0.301	0.526316	0.311	1.57895	0.328	3.36842
550	0.28	0.298	0.421053	0.312	1.89474	0.331	3.89474
555	0.281	0.301	0.631579	0.314	2	0.329	3.57895
560	0.279	0.303	1.05263	0.316	2.42105	0.329	3.78947
565	0.281	0.303	0.842105	0.317	2.31579	0.331	3.78947
570	0.28	0.302	0.842105	0.317	2.42105	0.332	4
575	0.279	0.304	1.15789	0.32	2.84211	0.332	4.10526
580	0.281	0.302	0.736842	0.32	2.63158	0.333	4
585	0.281	0.303	0.842105	0.322	2.84211	0.334	4.10526
590	0.279	0.303	1.05263	0.319	2.73684	0.331	4
595	0.281	0.305	1.05263	0.319	2.52632	0.334	4.10526
600	0.283	0.306	0.947368	0.324	2.84211	0.334	3.89474
605	0.281	0.304	0.947368	0.325	3.15789	0.335	4.21053
610	0.281	0.304	0.947368	0.325	3.15789	0.334	4.10526
615	0.281	0.303	0.842105	0.325	3.15789	0.336	4.31579
620	0.28	0.305	1.15789	0.326	3.36842	0.335	4.31579
625	0.281	0.305	1.05263	0.327	3.36842	0.335	4.21053
630	0.283	0.305	0.842105	0.329	3.36842	0.335	4
635	0.282	0.308	1.26316	0.327	3.26316	0.34	4.63158
640	0.283	0.308	1.15789	0.328	3.26316	0.338	4.31579
645	0.281	0.305	1.05263	0.329	3.57895	0.339	4.63158
650	0.28	0.309	1.57895	0.331	3.89474	0.339	4.73684
655	0.282	0.308	1.26316	0.335	4.10526	0.341	4.73684
660	0.283	0.308	1.15789	0.333	3.78947	0.34	4.52632
665	0.284	0.31	1.26316	0.332	3.57895	0.341	4.52632
670	0.281	0.309	1.47368	0.332	3.89474	0.341	4.84211
675	0.284	0.31	1.26316	0.335	3.89474	0.344	4.84211
680	0.283	0.311	1.47368	0.337	4.21053	0.345	5.05263
685	0.282	0.308	1.26316	0.335	4.10526	0.347	5.36842
690	0.283	0.312	1.57895	0.336	4.10526	0.343	4.84211
695	0.281	0.313	1.89474	0.336	4.31579	0.345	5.26316
700	0.282	0.313	1.78947	0.342	4.84211	0.346	5.26316
705	0.281	0.312	1.78947	0.336	4.31579	0.345	5.26316
710	0.283	0.314	1.78947	0.34	4.52632	0.348	5.36842
715	0.285	0.317	1.89474	0.338	4.10526	0.348	5.15789
720	0.281	0.315	2.10526	0.341	4.84211	0.344	5.15789
725	0.285	0.314	1.57895	0.34	4.31579	0.35	5.36842
730	0.285	0.319	2.10526	0.341	4.42105	0.35	5.36842
735	0.286	0.317	1.78947	0.344	4.63158	0.348	5.05263
740	0.284	0.318	2.10526	0.342	4.63158	0.352	5.68421
745	0.281	0.318	2.42105	0.348	5.57895	0.347	5.47368
750	0.284	0.318	2.10526	0.345	4.94737	0.35	5.47368
755	0.281	0.323	2.94737	0.348	5.57895	0.347	5.47368
760	0.285	0.324	2.63158	0.345	4.84211	0.35	5.36842
765	0.286	0.32	2.10526	0.35	5.26316	0.349	5.15789
770	0.283	0.321	2.52632	0.348	5.36842	0.352	5.78947
775	0.283	0.322	2.63158	0.349	5.47368	0.353	5.89474
780	0.284	0.319	2.21053	0.352	5.68421	0.352	5.68421
785	0.282	0.325	3.05263	0.347	5.36842	0.353	6
790	0.283	0.321	2.52632	0.353	5.89474	0.354	6
795	0.286	0.325	2.63158	0.349	5.15789	0.354	5.68421
800	0.283	0.327	3.15789	0.352	5.78947	0.353	5.89474
805	0.284	0.327	3.05263	0.347	5.15789	0.355	6
810	0.286	0.326	2.73684	0.349	5.15789	0.353	5.57895
815	0.286	0.33	3.15789	0.354	5.68421	0.354	5.68421
820	0.286	0.329	3.05263	0.355	5.78947	0.354	5.68421
825	0.285	0.329	3.15789	0.353	5.68421	0.356	6
830	0.286	0.33	3.15789	0.352	5.47368	0.357	6
835	0.285	0.328	3.05263	0.353	5.68421	0.354	5.78947
840	0.283	0.33	3.47368	0.354	6	0.355	6.10526
845	0.287	0.331	3.15789	0.351	5.26316	0.355	5.68421
850	0.286	0.334	3.57895	0.353	5.57895	0.359	6.21053
855	0.285	0.336	3.89474	0.356	6	0.355	5.89474
860	0.285	0.333	3.57895	0.355	5.89474	0.354	5.78947
865	0.287	0.335	3.57895	0.357	5.89474	0.357	5.89474
870	0.284	0.332	3.57895	0.355	6	0.359	6.42105
875	0.285	0.335	3.78947	0.362	6.63158	0.359	6.31579
880	0.289	0.332	3.05263	0.356	5.57895	0.355	5.47368
885	0.286	0.335	3.68421	0.355	5.78947	0.359	6.21053
890	0.286	0.335	3.68421	0.357	6	0.357	6
895	0.288	0.336	3.57895	0.358	5.89474	0.357	5.78947
900	0.283	0.337	4.21053	0.357	6.31579	0.358	6.42105
905	0.288	0.34	4	0.357	5.78947	0.358	5.89474
910	0.288	0.338	3.78947	0.359	6	0.359	6
915	0.288	0.336	3.57895	0.358	5.89474	0.356	5.68421
920	0.289	0.336	3.47368	0.362	6.21053	0.356	5.57895
925	0.287	0.339	4	0.356	5.78947	0.36	6.21053
930	0.288	0.337	3.68421	0.356	5.68421	0.359	6
935	0.288	0.34	4	0.359	6	0.358	5.89474
940	0.288	0.337	3.68421	0.358	5.89474	0.357	5.78947
945	0.289	0.339	3.78947	0.358	5.78947	0.359	5.89474
950	0.289	0.342	4.10526	0.359	5.89474	0.359	5.89474
955	0.288	0.337	3.68421	0.361	6.21053	0.359	6
960	0.29	0.337	3.47368	0.361	6	0.363	6.21053
965	0.29	0.339	3.68421	0.358	5.68421	0.357	5.57895
970	0.289	0.337	3.57895	0.363	6.31579	0.36	6
975	0.289	0.337	3.57895	0.361	6.10526	0.358	5.78947
980	0.289	0.338	3.68421	0.363	6.31579	0.36	6
985	0.288	0.336	3.57895	0.359	6	0.362	6.31579
990	0.289	0.338	3.68421	0.363	6.31579	0.358	5.78947
995	0.289	0.339	3.78947	0.365	6.52632	0.359	5.89474
1000	0.289	0.341	4	0.364	6.42105	0.359	5.89474
1005	0.287	0.339	4	0.366	6.84211	0.358	6
1010	0.287	0.339	4	0.365	6.73684	0.36	6.21053
1015	0.289	0.338	3.68421	0.366	6.63158	0.36	6
1020	0.29	0.342	4	0.37	6.94737	0.359	5.78947
1025	0.289	0.341	4	0.368	6.84211	0.359	5.89474
1030	0.291	0.34	3.68421	0.369	6.73684	0.357	5.47368
1035	0.289	0.342	4.10526	0.366	6.63158	0.361	6.10526
1040	0.292	0.339	3.47368	0.369	6.63158	0.36	5.68421
1045	0.292	0.34	3.57895	0.374	7.15789	0.361	5.78947
1050	0.293	0.34	3.47368	0.37	6.63158	0.363	5.89474
1055	0.289	0.338	3.68421	0.375	7.57895	0.36	6
1060	0.292	0.338	3.36842	0.372	6.94737	0.361	5.78947
1065	0.289	0.344	4.31579	0.374	7.47368	0.361	6.10526
1070	0.291	0.338	3.47368	0.375	7.36842	0.362	6
1075	0.294	0.342	3.57895	0.378	7.36842	0.363	5.78947
1080	0.289	0.342	4.10526	0.376	7.68421	0.362	6.21053
1085	0.289	0.342	4.10526	0.376	7.68421	0.366	6.63158
1090	0.292	0.343	3.89474	0.377	7.47368	0.365	6.21053
1095	0.29	0.341	3.89474	0.378	7.78947	0.363	6.21053
1100	0.29	0.342	4	0.382	8.21053	0.363	6.21053
1105	0.29	0.344	4.21053	0.38	8	0.362	6.10526
1110	0.291	0.341	3.78947	0.38	7.89474	0.366	6.42105
1115	0.29	0.343	4.10526	0.383	8.31579	0.364	6.31579
1120	0.293	0.344	3.89474	0.379	7.57895	0.364	6
1125	0.291	0.346	4.31579	0.377	7.57895	0.364	6.21053
1130	0.292	0.344	4	0.381	7.89474	0.366	6.31579
1135	0.292	0.342	3.78947	0.38	7.78947	0.368	6.52632
1140	0.294	0.348	4.21053	0.382	7.78947	0.366	6.10526
1145	0.289	0.345	4.42105	0.38	8.10526	0.368	6.84211
1150	0.29	0.346	4.42105	0.383	8.31579	0.368	6.73684
1155	0.289	0.346	4.52632	0.381	8.21053	0.369	6.94737
1160	0.291	0.344	4.10526	0.386	8.52632	0.369	6.73684
1165	0.289	0.344	4.31579	0.386	8.73684	0.37	7.05263
1170	0.29	0.347	4.52632	0.381	8.10526	0.367	6.63158
1175	0.291	0.347	4.42105	0.383	8.21053	0.371	6.94737
1180	0.288	0.344	4.42105	0.382	8.42105	0.37	7.15789
1185	0.29	0.349	4.73684	0.381	8.10526	0.371	7.05263
1190	0.295	0.347	4	0.387	8.21053	0.371	6.52632
1195	0.292	0.348	4.42105	0.383	8.10526	0.37	6.73684
1200	0.295	0.347	4	0.386	8.10526	0.372	6.63158
1205	0.294	0.35	4.42105	0.384	8	0.373	6.84211
1210	0.294	0.348	4.21053	0.389	8.52632	0.372	6.73684
1215	0.293	0.351	4.63158	0.387	8.42105	0.373	6.94737
1220	0.294	0.352	4.63158	0.388	8.42105	0.371	6.63158
1225	0.293	0.349	4.42105	0.387	8.42105	0.374	7.05263
1230	0.292	0.351	4.73684	0.387	8.52632	0.373	7.05263
1235	0.296	0.355	4.73684	0.387	8.10526	0.375	6.84211
1240	0.293	0.35	4.52632	0.388	8.52632	0.372	6.84211
1245	0.293	0.351	4.63158	0.386	8.31579	0.375	7.15789
1250	0.293	0.352	4.73684	0.388	8.52632	0.377	7.36842
1255	0.292	0.352	4.84211	0.389	8.73684	0.377	7.47368
1260	0.294	0.353	4.73684	0.388	8.42105	0.374	6.94737
1265	0.295	0.355	4.84211	0.39	8.52632	0.377	7.15789
1270	0.294	0.353	4.73684	0.388	8.42105	0.377	7.26316
1275	0.296	0.352	4.42105	0.389	8.31579	0.379	7.26316
1280	0.294	0.353	4.73684	0.389	8.52632	0.375	7.05263
1285	0.293	0.353	4.84211	0.391	8.84211	0.378	7.47368
1290	0.295	0.351	4.42105	0.392	8.73684	0.377	7.15789
1295	0.293	0.355	5.05263	0.394	9.15789	0.377	7.36842
1300	0.293	0.352	4.73684	0.387	8.42105	0.379	7.57895
1305	0.294	0.351	4.52632	0.391	8.73684	0.376	7.15789
1310	0.296	0.353	4.52632	0.389	8.31579	0.378	7.15789
1315	0.293	0.352	4.73684	0.391	8.84211	0.377	7.36842
1320	0.294	0.354	4.84211	0.392	8.84211	0.377	7.26316
1325	0.295	0.356	4.94737	0.392	8.73684	0.377	7.15789
1330	0.296	0.357	4.94737	0.395	8.94737	0.378	7.15789
1335	0.296	0.354	4.63158	0.389	8.31579	0.377	7.05263
1340	0.296	0.352	4.42105	0.393	8.73684	0.377	7.05263
1345	0.292	0.353	4.94737	0.391	8.94737	0.377	7.47368
1350	0.297	0.357	4.84211	0.392	8.52632	0.381	7.36842
1355	0.294	0.355	4.94737	0.395	9.15789	0.378	7.36842
1360	0.297	0.355	4.63158	0.394	8.73684	0.377	6.94737
1365	0.298	0.358	4.84211	0.394	8.63158	0.379	7.05263
1370	0.297	0.356	4.73684	0.396	8.94737	0.379	7.15789
1375	0.297	0.353	4.42105	0.395	8.84211	0.377	6.94737
1380	0.299	0.358	4.73684	0.394	8.52632	0.379	6.94737
1385	0.298	0.355	4.52632	0.394	8.63158	0.382	7.36842
1390	0.299	0.357	4.63158	0.394	8.52632	0.38	7.05263
1395	0.296	0.357	4.94737	0.395	8.94737	0.379	7.26316
1400	0.296	0.356	4.84211	0.394	8.84211	0.381	7.47368
1405	0.296	0.356	4.84211	0.394	8.84211	0.376	6.94737
1410	0.297	0.353	4.42105	0.397	9.05263	0.38	7.26316
1415	0.299	0.357	4.63158	0.394	8.52632	0.379	6.94737
1420	0.297	0.356	4.73684	0.395	8.84211	0.381	7.36842
1425	0.298	0.358	4.84211	0.397	8.94737	0.382	7.36842
1430	0.296	0.356	4.84211	0.397	9.15789	0.38	7.36842
1435	0.298	0.357	4.73684	0.394	8.63158	0.381	7.26316
1440	0.298	0.359	4.94737	0.396	8.84211	0.378	6.94737
1445	0.299	0.357	4.63158	0.395	8.63158	0.379	6.94737
1450	0.297	0.356	4.73684	0.395	8.84211	0.383	7.57895
1455	0.298	0.357	4.73684	0.398	9.05263	0.384	7.57895
1460	0.297	0.359	5.05263	0.398	9.15789	0.381	7.36842
1465	0.3	0.36	4.84211	0.399	8.94737	0.383	7.26316
1470	0.299	0.361	5.05263	0.398	8.94737	0.38	7.05263
1475	0.298	0.36	5.05263	0.398	9.05263	0.38	7.15789
1480	0.299	0.357	4.63158	0.397	8.84211	0.382	7.26316
1485	0.3	0.358	4.63158	0.398	8.84211	0.382	7.15789
1490	0.299	0.359	4.84211	0.399	9.05263	0.381	7.15789
1495	0.298	0.361	5.15789	0.398	9.05263	0.383	7.47368
1500	0.298	0.359	4.94737	0.395	8.73684	0.384	7.57895
1505	0.299	0.358	4.73684	0.395	8.63158	0.384	7.47368
1510	0.3	0.361	4.94737	0.397	8.73684	0.382	7.15789
1515	0.3	0.361	4.94737	0.398	8.84211	0.384	7.36842
1520	0.302	0.361	4.73684	0.398	8.63158	0.38	6.73684
1525	0.3	0.363	5.15789	0.4	9.05263	0.381	7.05263
1530	0.298	0.362	5.26316	0.396	8.84211	0.385	7.68421
1535	0.298	0.363	5.36842	0.399	9.15789	0.384	7.57895
1540	0.3	0.362	5.05263	0.397	8.73684	0.381	7.05263
1545	0.301	0.358	4.52632	0.399	8.84211	0.383	7.15789
1550	0.303	0.361	4.63158	0.4	8.73684	0.382	6.84211
1555	0.301	0.361	4.84211	0.397	8.63158	0.385	7.36842
1560	0.3	0.358	4.63158	0.398	8.84211	0.385	7.47368
1565	0.299	0.36	4.94737	0.402	9.36842	0.383	7.36842
1570	0.299	0.36	4.94737	0.399	9.05263	0.386	7.68421
1575	0.301	0.361	4.84211	0.401	9.05263	0.384	7.26316
1580	0.301	0.36	4.73684	0.401	9.05263	0.385	7.36842
1585	0.302	0.363	4.94737	0.403	9.15789	0.385	7.26316
1590	0.302	0.363	4.94737	0.402	9.05263	0.385	7.26316
1595	0.299	0.364	5.36842	0.398	8.94737	0.385	7.57895
1600	0.302	0.362	4.84211	0.404	9.26316	0.386	7.36842
1605	0.303	0.366	5.15789	0.404	9.15789	0.387	7.36842
1610	0.305	0.364	4.73684	0.399	8.42105	0.386	7.05263
1615	0.3	0.362	5.05263	0.404	9.47368	0.387	7.68421
1620	0.301	0.365	5.26316	0.403	9.26316	0.386	7.47368
1625	0.302	0.363	4.94737	0.402	9.05263	0.386	7.36842
1630	0.301	0.366	5.36842	0.401	9.05263	0.388	7.68421
1635	0.302	0.365	5.15789	0.402	9.05263	0.386	7.36842
1640	0.301	0.366	5.36842	0.4	8.94737	0.386	7.47368
1645	0.302	0.361	4.73684	0.401	8.94737	0.386	7.36842
1650	0.304	0.362	4.63158	0.403	8.94737	0.386	7.15789
1655	0.301	0.366	5.36842	0.401	9.05263	0.385	7.36842
1660	0.302	0.362	4.84211	0.403	9.15789	0.389	7.68421
1665	0.302	0.365	5.15789	0.402	9.05263	0.386	7.36842
1670	0.3	0.365	5.36842	0.398	8.84211	0.389	7.89474
1675	0.302	0.365	5.15789	0.405	9.36842	0.387	7.47368
1680	0.305	0.366	4.94737	0.406	9.15789	0.387	7.15789
1685	0.303	0.37	5.57895	0.406	9.36842	0.387	7.36842
1690	0.302	0.367	5.36842	0.406	9.47368	0.387	7.47368
1695	0.302	0.367	5.36842	0.407	9.57895	0.391	7.89474
1700	0.302	0.364	5.05263	0.406	9.47368	0.39	7.78947
1705	0.302	0.369	5.57895	0.406	9.47368	0.388	7.57895
1710	0.303	0.366	5.15789	0.404	9.15789	0.388	7.47368
1715	0.304	0.366	5.05263	0.406	9.26316	0.39	7.57895
1720	0.302	0.366	5.26316	0.404	9.26316	0.389	7.68421
1725	0.304	0.366	5.05263	0.404	9.05263	0.386	7.15789
1730	0.303	0.366	5.15789	0.405	9.26316	0.386	7.26316
1735	0.301	0.366	5.36842	0.41	10	0.39	7.89474
1740	0.306	0.368	5.05263	0.405	8.94737	0.388	7.15789
1745	0.305	0.369	5.26316	0.405	9.05263	0.389	7.36842
1750	0.304	0.365	4.94737	0.405	9.15789	0.39	7.57895
1755	0.302	0.364	5.05263	0.406	9.47368	0.388	7.57895
1760	0.305	0.368	5.15789	0.409	9.47368	0.391	7.57895
1765	0.304	0.37	5.47368	0.407	9.36842	0.393	7.89474
1770	0.304	0.368	5.26316	0.408	9.47368	0.391	7.68421
1775	0.306	0.371	5.36842	0.409	9.36842	0.389	7.26316
1780	0.305	0.368	5.15789	0.408	9.36842	0.389	7.36842
1785	0.302	0.369	5.57895	0.413	10.2105	0.39	7.78947
1790	0.306	0.365	4.73684	0.407	9.15789	0.391	7.47368
1795	0.303	0.368	5.36842	0.408	9.57895	0.393	8
1800	0.307	0.371	5.26316	0.406	8.94737	0.389	7.15789

## Sheet: 300Tu_LZ
Time (sec)	BG_OD360	1st_OD360	1st_ΔPi con. (μM)	2nd_OD360	2nd_ΔPi con. (μM)	3rd_OD360	3rd_ΔPi con. (μM)
	0.158	0.075		0.13		0.119
5	0.175	0.097	-9.68421	0.147	-4.42105	0.137	-5.47368
10	0.192	0.118	-9.26316	0.165	-4.31579	0.16	-4.84211
15	0.203	0.136	-8.52632	0.177	-4.21053	0.182	-3.68421
20	0.218	0.149	-8.73684	0.192	-4.21053	0.196	-3.78947
25	0.226	0.165	-7.89474	0.207	-3.47368	0.209	-3.26316
30	0.234	0.176	-7.57895	0.217	-3.26316	0.226	-2.31579
35	0.25	0.185	-8.31579	0.225	-4.10526	0.234	-3.15789
40	0.248	0.197	-6.84211	0.23	-3.36842	0.243	-2
45	0.254	0.204	-6.73684	0.239	-3.05263	0.253	-1.57895
50	0.261	0.207	-7.15789	0.245	-3.15789	0.259	-1.68421
55	0.264	0.214	-6.73684	0.249	-3.05263	0.266	-1.26316
60	0.267	0.22	-6.42105	0.255	-2.73684	0.27	-1.15789
65	0.271	0.221	-6.73684	0.259	-2.73684	0.278	-0.736842
70	0.276	0.226	-6.73684	0.261	-3.05263	0.28	-1.05263
75	0.275	0.227	-6.52632	0.261	-2.94737	0.284	-0.526316
80	0.277	0.231	-6.31579	0.266	-2.63158	0.287	-0.421053
85	0.287	0.233	-7.15789	0.265	-3.78947	0.287	-1.47368
90	0.278	0.232	-6.31579	0.268	-2.52632	0.289	-0.315789
95	0.282	0.235	-6.42105	0.271	-2.63158	0.294	-0.210526
100	0.284	0.237	-6.42105	0.269	-3.05263	0.293	-0.526316
105	0.284	0.239	-6.21053	0.272	-2.73684	0.295	-0.315789
110	0.284	0.238	-6.31579	0.271	-2.84211	0.294	-0.421053
115	0.284	0.237	-6.42105	0.269	-3.05263	0.295	-0.315789
120	0.283	0.236	-6.42105	0.271	-2.73684	0.294	-0.315789
125	0.287	0.238	-6.63158	0.271	-3.15789	0.294	-0.736842
130	0.283	0.238	-6.21053	0.274	-2.42105	0.298	0.105263
135	0.286	0.239	-6.42105	0.273	-2.84211	0.297	-0.315789
140	0.285	0.238	-6.42105	0.273	-2.73684	0.294	-0.526316
145	0.287	0.237	-6.73684	0.273	-2.94737	0.298	-0.315789
150	0.289	0.237	-6.94737	0.271	-3.36842	0.299	-0.421053
155	0.286	0.239	-6.42105	0.274	-2.73684	0.297	-0.315789
160	0.287	0.237	-6.73684	0.271	-3.15789	0.296	-0.526316
165	0.285	0.238	-6.42105	0.271	-2.94737	0.297	-0.210526
170	0.286	0.241	-6.21053	0.274	-2.73684	0.3	1.27822e-15
175	0.284	0.238	-6.31579	0.269	-3.05263	0.296	-0.210526
180	0.285	0.237	-6.52632	0.272	-2.84211	0.299	1.27822e-15
185	0.286	0.239	-6.42105	0.271	-3.05263	0.297	-0.315789
190	0.284	0.238	-6.31579	0.274	-2.52632	0.297	-0.105263
195	0.284	0.239	-6.21053	0.274	-2.52632	0.298	1.27822e-15
200	0.287	0.239	-6.52632	0.271	-3.15789	0.298	-0.315789
205	0.286	0.239	-6.42105	0.271	-3.05263	0.298	-0.210526
210	0.285	0.238	-6.42105	0.27	-3.05263	0.296	-0.315789
215	0.283	0.238	-6.21053	0.27	-2.84211	0.306	0.947368
220	0.286	0.238	-6.52632	0.271	-3.05263	0.296	-0.421053
225	0.284	0.237	-6.42105	0.273	-2.63158	0.295	-0.315789
230	0.286	0.24	-6.31579	0.268	-3.36842	0.299	-0.105263
235	0.284	0.239	-6.21053	0.269	-3.05263	0.296	-0.210526
240	0.282	0.237	-6.21053	0.272	-2.52632	0.296	1.27822e-15
245	0.284	0.24	-6.10526	-0.789	-114.421	-0.82	-117.684
250	0.285	0.239	-6.31579	-0.802	-115.895	-0.821	-117.895
255	0.286	-0.806	-116.421	0.228	-7.57895	0.234	-6.94737
260	0.283	-0.805	-116	0.241	-5.89474	0.251	-4.84211
265	0.285	0.22	-8.31579	0.244	-5.78947	0.259	-4.21053
270	0.286	0.207	-9.78947	0.246	-5.68421	0.264	-3.78947
275	0.286	0.204	-10.1053	0.246	-5.68421	0.27	-3.15789
280	0.284	0.208	-9.47368	0.251	-4.94737	0.271	-2.84211
285	0.281	0.213	-8.63158	0.253	-4.42105	0.278	-1.78947
290	0.285	0.216	-8.73684	0.255	-4.63158	0.281	-1.89474
295	0.284	0.222	-8	0.255	-4.52632	0.282	-1.68421
300	0.288	0.226	-8	0.26	-4.42105	0.287	-1.57895
305	0.282	0.231	-6.84211	0.26	-3.78947	0.29	-0.631579
310	0.285	0.239	-6.31579	0.266	-3.47368	0.292	-0.736842
315	0.286	0.243	-6	0.267	-3.47368	0.294	-0.631579
320	0.286	0.249	-5.36842	0.275	-2.63158	0.3	1.27822e-15
325	0.287	0.251	-5.26316	0.273	-2.94737	0.302	0.105263
330	0.285	0.257	-4.42105	0.277	-2.31579	0.308	0.947368
335	0.285	0.266	-3.47368	0.279	-2.10526	0.311	1.26316
340	0.286	0.271	-3.05263	0.287	-1.36842	0.316	1.68421
345	0.284	0.273	-2.63158	0.289	-0.947368	0.317	2
350	0.284	0.281	-1.78947	0.293	-0.526316	0.323	2.63158
355	0.285	0.284	-1.57895	0.297	-0.210526	0.324	2.63158
360	0.286	0.292	-0.842105	0.3	1.27822e-15	0.33	3.15789
365	0.288	0.297	-0.526316	0.299	-0.315789	0.336	3.57895
370	0.286	0.301	0.105263	0.306	0.631579	0.341	4.31579
375	0.284	0.308	1.05263	0.308	1.05263	0.342	4.63158
380	0.287	0.312	1.15789	0.312	1.15789	0.346	4.73684
385	0.286	0.32	2.10526	0.314	1.47368	0.348	5.05263
390	0.284	0.323	2.63158	0.318	2.10526	0.354	5.89474
395	0.285	0.325	2.73684	0.323	2.52632	0.357	6.10526
400	0.284	0.333	3.68421	0.323	2.63158	0.362	6.73684
405	0.286	0.332	3.36842	0.329	3.05263	0.364	6.73684
410	0.283	0.34	4.52632	0.332	3.68421	0.368	7.47368
415	0.285	0.344	4.73684	0.336	3.89474	0.37	7.47368
420	0.286	0.348	5.05263	0.335	3.68421	0.373	7.68421
425	0.286	0.349	5.15789	0.338	4	0.378	8.21053
430	0.287	0.355	5.68421	0.343	4.42105	0.379	8.21053
435	0.287	0.357	5.89474	0.342	4.31579	0.386	8.94737
440	0.287	0.36	6.21053	0.346	4.73684	0.385	8.84211
445	0.286	0.366	6.94737	0.353	5.57895	0.393	9.78947
450	0.287	0.367	6.94737	0.354	5.57895	0.395	9.89474
455	0.287	0.371	7.36842	0.36	6.21053	0.398	10.2105
460	0.285	0.376	8.10526	0.363	6.73684	0.399	10.5263
465	0.288	0.379	8.10526	0.365	6.63158	0.403	10.6316
470	0.286	0.382	8.63158	0.365	6.84211	0.404	10.9474
475	0.286	0.386	9.05263	0.373	7.68421	0.409	11.4737
480	0.285	0.39	9.57895	0.373	7.78947	0.41	11.6842
485	0.288	0.39	9.26316	0.377	7.89474	0.414	11.7895
490	0.291	0.395	9.47368	0.378	7.68421	0.416	11.6842
495	0.289	0.396	9.78947	0.38	8.10526	0.418	12.1053
500	0.287	0.399	10.3158	0.382	8.52632	0.422	12.7368
505	0.288	0.401	10.4211	0.387	8.94737	0.424	12.8421
510	0.287	0.404	10.8421	0.383	8.63158	0.426	13.1579
515	0.289	0.408	11.0526	0.39	9.15789	0.428	13.1579
520	0.291	0.406	10.6316	0.395	9.47368	0.435	13.6842
525	0.289	0.409	11.1579	0.397	9.89474	0.434	13.7895
530	0.289	0.413	11.5789	0.393	9.47368	0.437	14.1053
535	0.286	0.416	12.2105	0.398	10.3158	0.439	14.6316
540	0.286	0.416	12.2105	0.402	10.7368	0.442	14.9474
545	0.289	0.416	11.8947	0.402	10.4211	0.443	14.7368
550	0.287	0.419	12.4211	0.406	11.0526	0.442	14.8421
555	0.287	0.421	12.6316	0.408	11.2632	0.448	15.4737
560	0.289	0.421	12.4211	0.41	11.2632	0.448	15.2632
565	0.289	0.424	12.7368	0.413	11.5789	0.453	15.7895
570	0.29	0.424	12.6316	0.414	11.5789	0.454	15.7895
575	0.289	0.427	13.0526	0.417	12	0.454	15.8947
580	0.289	0.429	13.2632	0.419	12.2105	0.457	16.2105
585	0.291	0.429	13.0526	0.42	12.1053	0.459	16.2105
590	0.29	0.431	13.3684	0.417	11.8947	0.461	16.5263
595	0.289	0.431	13.4737	0.42	12.3158	0.462	16.7368
600	0.289	0.436	14	0.428	13.1579	0.462	16.7368
605	0.293	0.438	13.7895	0.423	12.2105	0.467	16.8421
610	0.29	0.435	13.7895	0.428	13.0526	0.466	17.0526
615	0.287	0.441	14.7368	0.428	13.3684	0.472	18
620	0.289	0.441	14.5263	0.431	13.4737	0.469	17.4737
625	0.294	0.442	14.1053	0.432	13.0526	0.474	17.4737
630	0.288	0.438	14.3158	0.433	13.7895	0.474	18.1053
635	0.287	0.442	14.8421	0.438	14.4211	0.475	18.3158
640	0.289	0.447	15.1579	0.439	14.3158	0.473	17.8947
645	0.291	0.447	14.9474	0.439	14.1053	0.481	18.5263
650	0.289	0.446	15.0526	0.439	14.3158	0.481	18.7368
655	0.29	0.449	15.2632	0.443	14.6316	0.482	18.7368
660	0.292	0.448	14.9474	0.444	14.5263	0.481	18.4211
665	0.287	0.445	15.1579	0.445	15.1579	0.483	19.1579
670	0.29	0.45	15.3684	0.448	15.1579	0.487	19.2632
675	0.289	0.453	15.7895	0.448	15.2632	0.488	19.4737
680	0.291	0.454	15.6842	0.454	15.6842	0.49	19.4737
685	0.29	0.452	15.5789	0.453	15.6842	0.49	19.5789
690	0.29	0.454	15.7895	0.455	15.8947	0.491	19.6842
695	0.291	0.453	15.5789	0.455	15.7895	0.494	19.8947
700	0.291	0.454	15.6842	0.454	15.6842	0.495	20
705	0.291	0.456	15.8947	0.454	15.6842	0.492	19.6842
710	0.291	0.461	16.4211	0.459	16.2105	0.495	20
715	0.29	0.461	16.5263	0.458	16.2105	0.493	19.8947
720	0.295	0.462	16.1053	0.458	15.6842	0.499	20
725	0.292	0.459	16.1053	0.461	16.3158	0.495	19.8947
730	0.292	0.459	16.1053	0.464	16.6316	0.498	20.2105
735	0.292	0.463	16.5263	0.465	16.7368	0.5	20.4211
740	0.293	0.464	16.5263	0.465	16.6316	0.502	20.5263
745	0.294	0.466	16.6316	0.467	16.7368	0.501	20.3158
750	0.292	0.466	16.8421	0.467	16.9474	0.504	20.8421
755	0.293	0.472	17.3684	0.468	16.9474	0.505	20.8421
760	0.295	0.467	16.6316	0.473	17.2632	0.503	20.4211
765	0.294	0.46	16	0.476	17.6842	0.507	20.9474
770	0.296	0.47	16.8421	0.477	17.5789	0.506	20.6316
775	0.293	0.471	17.2632	0.473	17.4737	0.506	20.9474
780	0.294	0.471	17.1579	0.475	17.5789	0.51	21.2632
785	0.293	0.471	17.2632	0.473	17.4737	0.508	21.1579
790	0.291	0.469	17.2632	0.476	18	0.51	21.5789
795	0.292	0.476	17.8947	0.476	17.8947	0.512	21.6842
800	0.294	0.474	17.4737	0.48	18.1053	0.514	21.6842
805	0.292	0.473	17.5789	0.481	18.4211	0.512	21.6842
810	0.294	0.477	17.7895	0.479	18	0.513	21.5789
815	0.294	0.477	17.7895	0.482	18.3158	0.512	21.4737
820	0.291	0.476	18	0.481	18.5263	0.517	22.3158
825	0.292	0.477	18	0.489	19.2632	0.514	21.8947
830	0.296	0.477	17.5789	0.485	18.4211	0.518	21.8947
835	0.294	0.481	18.2105	0.484	18.5263	0.518	22.1053
840	0.295	0.482	18.2105	0.488	18.8421	0.521	22.3158
845	0.294	0.485	18.6316	0.487	18.8421	0.52	22.3158
850	0.294	0.485	18.6316	0.493	19.4737	0.522	22.5263
855	0.296	0.488	18.7368	0.487	18.6316	0.52	22.1053
860	0.294	0.484	18.5263	0.491	19.2632	0.52	22.3158
865	0.295	0.489	18.9474	0.493	19.3684	0.519	22.1053
870	0.293	0.487	18.9474	0.49	19.2632	0.522	22.6316
875	0.294	0.489	19.0526	0.492	19.3684	0.522	22.5263
880	0.296	0.49	18.9474	0.494	19.3684	0.523	22.4211
885	0.294	0.492	19.3684	0.491	19.2632	0.524	22.7368
890	0.295	0.493	19.3684	0.496	19.6842	0.525	22.7368
895	0.294	0.493	19.4737	0.496	19.7895	0.523	22.6316
900	0.293	0.496	19.8947	0.493	19.5789	0.523	22.7368
905	0.293	0.5	20.3158	0.493	19.5789	0.524	22.8421
910	0.294	0.498	20	0.495	19.6842	0.525	22.8421
915	0.295	0.501	20.2105	0.505	20.6316	0.522	22.4211
920	0.294	0.497	19.8947	0.499	20.1053	0.528	23.1579
925	0.294	0.503	20.5263	0.502	20.4211	0.527	23.0526
930	0.293	0.505	20.8421	0.501	20.4211	0.526	23.0526
935	0.295	0.503	20.4211	0.505	20.6316	0.531	23.3684
940	0.293	0.505	20.8421	0.506	20.9474	0.528	23.2632
945	0.297	0.507	20.6316	0.504	20.3158	0.529	22.9474
950	0.295	0.506	20.7368	0.506	20.7368	0.528	23.0526
955	0.295	0.505	20.6316	0.509	21.0526	0.532	23.4737
960	0.295	0.504	20.5263	0.509	21.0526	0.527	22.9474
965	0.295	0.509	21.0526	0.509	21.0526	0.533	23.5789
970	0.294	0.511	21.3684	0.507	20.9474	0.531	23.4737
975	0.294	0.506	20.8421	0.513	21.5789	0.529	23.2632
980	0.3	0.512	20.8421	0.515	21.1579	0.533	23.0526
985	0.293	0.515	21.8947	0.514	21.7895	0.529	23.3684
990	0.296	0.507	20.7368	0.515	21.5789	0.53	23.1579
995	0.297	0.514	21.3684	0.532	23.2632	0.532	23.2632
1000	0.297	0.513	21.2632	0.518	21.7895	0.531	23.1579
1005	0.304	0.515	20.7368	0.52	21.2632	0.535	22.8421
1010	0.293	0.514	21.7895	0.517	22.1053	0.529	23.3684
1015	0.295	0.518	22	0.521	22.3158	0.529	23.1579
1020	0.298	0.515	21.3684	0.523	22.2105	0.529	22.8421
1025	0.296	0.517	21.7895	0.522	22.3158	0.531	23.2632
1030	0.296	0.516	21.6842	0.524	22.5263	0.53	23.1579
1035	0.298	0.512	21.0526	0.529	22.8421	0.532	23.1579
1040	0.293	0.515	21.8947	0.531	23.5789	0.532	23.6842
1045	0.297	0.517	21.6842	0.529	22.9474	0.532	23.2632
1050	0.297	0.515	21.4737	0.53	23.0526	0.53	23.0526
1055	0.296	0.515	21.5789	0.531	23.2632	0.528	22.9474
1060	0.297	0.518	21.7895	0.534	23.4737	0.531	23.1579
1065	0.297	0.518	21.7895	0.531	23.1579	0.531	23.1579
1070	0.297	0.519	21.8947	0.539	24	0.533	23.3684
1075	0.301	0.516	21.1579	0.536	23.2632	0.532	22.8421
1080	0.299	0.518	21.5789	0.536	23.4737	0.53	22.8421
1085	0.298	0.517	21.5789	0.539	23.8947	0.533	23.2632
1090	0.298	0.516	21.4737	0.537	23.6842	0.531	23.0526
1095	0.296	0.517	21.7895	0.539	24.1053	0.528	22.9474
1100	0.298	0.519	21.7895	0.541	24.1053	0.533	23.2632
1105	0.298	0.52	21.8947	0.536	23.5789	0.531	23.0526
1110	0.298	0.516	21.4737	0.543	24.3158	0.531	23.0526
1115	0.297	0.512	21.1579	0.541	24.2105	0.525	22.5263
1120	0.299	0.517	21.4737	0.541	24	0.531	22.9474
1125	0.302	0.523	21.7895	0.546	24.2105	0.532	22.7368
1130	0.297	0.516	21.5789	0.543	24.4211	0.528	22.8421
1135	0.3	0.519	21.5789	0.545	24.3158	0.532	22.9474
1140	0.302	0.522	21.6842	0.55	24.6316	0.528	22.3158
1145	0.298	0.519	21.7895	0.548	24.8421	0.528	22.7368
1150	0.299	0.52	21.7895	0.552	25.1579	0.528	22.6316
1155	0.297	0.523	22.3158	0.546	24.7368	0.527	22.7368
1160	0.298	0.522	22.1053	0.554	25.4737	0.528	22.7368
1165	0.302	0.518	21.2632	0.561	25.7895	0.529	22.4211
1170	0.299	0.522	22	0.55	24.9474	0.531	22.9474
1175	0.302	0.521	21.5789	0.548	24.4211	0.527	22.2105
1180	0.299	0.52	21.7895	0.555	25.4737	0.531	22.9474
1185	0.3	0.519	21.5789	0.553	25.1579	0.529	22.6316
1190	0.3	0.53	22.7368	0.554	25.2632	0.532	22.9474
1195	0.299	0.52	21.7895	0.552	25.1579	0.529	22.7368
1200	0.299	0.519	21.6842	0.554	25.3684	0.531	22.9474
1205	0.3	0.521	21.7895	0.556	25.4737	0.53	22.7368
1210	0.3	0.527	22.4211	0.556	25.4737	0.535	23.2632
1215	0.301	0.523	21.8947	0.555	25.2632	0.53	22.6316
1220	0.304	0.524	21.6842	0.553	24.7368	0.531	22.4211
1225	0.3	0.527	22.4211	0.554	25.2632	0.535	23.2632
1230	0.301	0.521	21.6842	0.553	25.0526	0.537	23.3684
1235	0.301	0.524	22	0.555	25.2632	0.538	23.4737
1240	0.298	0.523	22.2105	0.557	25.7895	0.539	23.8947
1245	0.3	0.523	22	0.557	25.5789	0.531	22.8421
1250	0.299	0.523	22.1053	0.556	25.5789	0.537	23.5789
1255	0.301	0.529	22.5263	0.561	25.8947	0.54	23.6842
1260	0.3	0.523	22	0.565	26.4211	0.539	23.6842
1265	0.3	0.522	21.8947	0.556	25.4737	0.54	23.7895
1270	0.301	0.528	22.4211	0.557	25.4737	0.542	23.8947
1275	0.302	0.525	22	0.559	25.5789	0.542	23.7895
1280	0.299	0.527	22.5263	0.56	26	0.543	24.2105
1285	0.3	0.526	22.3158	0.558	25.6842	0.545	24.3158
1290	0.299	0.529	22.7368	0.56	26	0.54	23.8947
1295	0.305	0.528	22	0.553	24.6316	0.545	23.7895
1300	0.297	0.525	22.5263	0.559	26.1053	0.545	24.6316
1305	0.3	0.529	22.6316	0.558	25.6842	0.543	24.1053
1310	0.297	0.53	23.0526	0.557	25.8947	0.546	24.7368
1315	0.302	0.529	22.4211	0.559	25.5789	0.548	24.4211
1320	0.302	0.53	22.5263	0.556	25.2632	0.544	24
1325	0.302	0.527	22.2105	0.559	25.5789	0.544	24
1330	0.306	0.529	22	0.559	25.1579	0.547	23.8947
1335	0.304	0.529	22.2105	0.558	25.2632	0.545	23.8947
1340	0.302	0.527	22.2105	0.563	26	0.562	25.8947
1345	0.301	0.528	22.4211	0.562	26	0.548	24.5263
1350	0.301	0.531	22.7368	0.564	26.2105	0.551	24.8421
1355	0.301	0.532	22.8421	0.557	25.4737	0.549	24.6316
1360	0.303	0.532	22.6316	0.564	26	0.545	24
1365	0.302	0.53	22.5263	0.567	26.4211	0.549	24.5263
1370	0.3	0.532	22.9474	0.559	25.7895	0.55	24.8421
1375	0.304	0.532	22.5263	0.562	25.6842	0.549	24.3158
1380	0.301	0.53	22.6316	0.566	26.4211	0.548	24.5263
1385	0.302	0.527	22.2105	0.56	25.6842	0.548	24.4211
1390	0.302	0.53	22.5263	0.562	25.8947	0.552	24.8421
1395	0.302	0.533	22.8421	0.56	25.6842	0.551	24.7368
1400	0.302	0.529	22.4211	0.559	25.5789	0.552	24.8421
1405	0.3	0.532	22.9474	0.564	26.3158	0.554	25.2632
1410	0.303	0.534	22.8421	0.566	26.2105	0.553	24.8421
1415	0.303	0.533	22.7368	0.565	26.1053	0.554	24.9474
1420	0.303	0.534	22.8421	0.566	26.2105	0.553	24.8421
1425	0.301	0.53	22.6316	0.565	26.3158	0.551	24.8421
1430	0.299	0.532	23.0526	0.567	26.7368	0.555	25.4737
1435	0.304	0.532	22.5263	0.566	26.1053	0.554	24.8421
1440	0.304	0.534	22.7368	0.57	26.5263	0.551	24.5263
1445	0.305	0.535	22.7368	0.563	25.6842	0.555	24.8421
1450	0.303	0.536	23.0526	0.569	26.5263	0.555	25.0526
1455	0.304	0.531	22.4211	0.563	25.7895	0.555	24.9474
1460	0.303	0.534	22.8421	0.569	26.5263	0.551	24.6316
1465	0.301	0.535	23.1579	0.568	26.6316	0.553	25.0526
1470	0.304	0.537	23.0526	0.567	26.2105	0.553	24.7368
1475	0.305	0.534	22.6316	0.563	25.6842	0.56	25.3684
1480	0.306	0.534	22.5263	0.564	25.6842	0.552	24.4211
1485	0.308	0.537	22.6316	0.566	25.6842	0.556	24.6316
1490	0.304	0.535	22.8421	0.568	26.3158	0.555	24.9474
1495	0.301	0.534	23.0526	0.57	26.8421	0.558	25.5789
1500	0.302	0.533	22.8421	0.568	26.5263	0.557	25.3684
1505	0.303	0.53	22.4211	0.563	25.8947	0.558	25.3684
1510	0.305	0.537	22.9474	0.566	26	0.557	25.0526
1515	0.303	0.537	23.1579	0.569	26.5263	0.554	24.9474
1520	0.302	0.536	23.1579	0.567	26.4211	0.554	25.0526
1525	0.307	0.541	23.1579	0.571	26.3158	0.557	24.8421
1530	0.303	0.538	23.2632	0.57	26.6316	0.558	25.3684
1535	0.305	0.54	23.2632	0.565	25.8947	0.561	25.4737
1540	0.303	0.536	23.0526	0.569	26.5263	0.56	25.5789
1545	0.304	0.538	23.1579	0.568	26.3158	0.559	25.3684
1550	0.307	0.542	23.2632	0.571	26.3158	0.56	25.1579
1555	0.308	0.539	22.8421	0.572	26.3158	0.56	25.0526
1560	0.306	0.538	22.9474	0.569	26.2105	0.56	25.2632
1565	0.305	0.533	22.5263	0.57	26.4211	0.558	25.1579
1570	0.307	0.537	22.7368	0.572	26.4211	0.56	25.1579
1575	0.305	0.538	23.0526	0.573	26.7368	0.56	25.3684
1580	0.306	0.54	23.1579	0.571	26.4211	0.558	25.0526
1585	0.307	0.533	22.3158	0.568	26	0.555	24.6316
1590	0.302	0.539	23.4737	0.571	26.8421	0.558	25.4737
1595	0.306	0.54	23.1579	0.568	26.1053	0.559	25.1579
1600	0.308	0.543	23.2632	0.575	26.6316	0.559	24.9474
1605	0.307	0.542	23.2632	0.568	26	0.561	25.2632
1610	0.305	0.537	22.9474	0.572	26.6316	0.561	25.4737
1615	0.309	0.542	23.0526	0.569	25.8947	0.561	25.0526
1620	0.305	0.542	23.4737	0.572	26.6316	0.563	25.6842
1625	0.309	0.542	23.0526	0.572	26.2105	0.562	25.1579
1630	0.308	0.541	23.0526	0.575	26.6316	0.56	25.0526
1635	0.306	0.543	23.4737	0.572	26.5263	0.557	24.9474
1640	0.307	0.544	23.4737	0.57	26.2105	0.559	25.0526
1645	0.311	0.542	22.8421	0.573	26.1053	0.564	25.1579
1650	0.308	0.543	23.2632	0.573	26.4211	0.562	25.2632
1655	0.306	0.542	23.3684	0.576	26.9474	0.56	25.2632
1660	0.307	0.546	23.6842	0.573	26.5263	0.566	25.7895
1665	0.31	0.542	22.9474	0.578	26.7368	0.555	24.3158
1670	0.308	0.542	23.1579	0.574	26.5263	0.564	25.4737
1675	0.309	0.542	23.0526	0.571	26.1053	0.561	25.0526
1680	0.307	0.547	23.7895	0.575	26.7368	0.563	25.4737
1685	0.306	0.544	23.5789	0.578	27.1579	0.563	25.5789
1690	0.308	0.542	23.1579	0.573	26.4211	0.562	25.2632
1695	0.309	0.552	24.1053	0.573	26.3158	0.567	25.6842
1700	0.308	0.545	23.4737	0.577	26.8421	0.56	25.0526
1705	0.307	0.543	23.3684	0.571	26.3158	0.561	25.2632
1710	0.308	0.548	23.7895	0.576	26.7368	0.566	25.6842
1715	0.31	0.548	23.5789	0.577	26.6316	0.563	25.1579
1720	0.31	0.548	23.5789	0.578	26.7368	0.561	24.9474
1725	0.308	0.546	23.5789	0.579	27.0526	0.566	25.6842
1730	0.31	0.547	23.4737	0.576	26.5263	0.565	25.3684
1735	0.309	0.551	24	0.582	27.2632	0.565	25.4737
1740	0.31	0.547	23.4737	0.576	26.5263	0.563	25.1579
1745	0.309	0.552	24.1053	0.579	26.9474	0.566	25.5789
1750	0.309	0.545	23.3684	0.575	26.5263	0.564	25.3684
1755	0.31	0.545	23.2632	0.575	26.4211	0.562	25.0526
1760	0.31	0.552	24	0.576	26.5263	0.568	25.6842
1765	0.31	0.549	23.6842	0.577	26.6316	0.566	25.4737
1770	0.306	0.549	24.1053	0.58	27.3684	0.568	26.1053
1775	0.307	0.55	24.1053	0.581	27.3684	0.565	25.6842
1780	0.31	0.55	23.7895	0.581	27.0526	0.569	25.7895
1785	0.31	0.552	24	0.578	26.7368	0.565	25.3684
1790	0.309	0.544	23.2632	0.581	27.1579	0.568	25.7895
1795	0.308	0.553	24.3158	0.581	27.2632	0.569	26
1800	0.308	0.552	24.2105	0.586	27.7895	0.569	26

## Sheet: 1000Tu_LZ
Time (sec)	BG_OD360	1st_OD360	1st_ΔPi con. (μM)	2nd_OD360	2nd_ΔPi con. (μM)	3rd_OD360	3rd_ΔPi con. (μM)
	0.156	0.152		0.113		0.103
5	0.177	0.173	-1.89474	0.134	-6	0.122	-7.26316
10	0.191	0.194	-1.15789	0.155	-5.26316	0.145	-6.31579
15	0.204	0.213	-0.526316	0.169	-5.15789	0.164	-5.68421
20	0.216	0.226	-0.421053	0.184	-4.84211	0.181	-5.15789
25	0.229	0.237	-0.631579	0.197	-4.84211	0.194	-5.15789
30	0.237	0.248	-0.315789	0.21	-4.31579	0.208	-4.52632
35	0.248	0.259	-0.315789	0.219	-4.52632	0.215	-4.94737
40	0.252	0.265	-0.105263	0.227	-4.10526	0.228	-4
45	0.259	0.273	1.27822e-15	0.235	-4	0.236	-3.89474
50	0.265	0.277	-0.210526	0.242	-3.89474	0.248	-3.26316
55	0.271	0.283	-0.210526	0.25	-3.68421	0.253	-3.36842
60	0.276	0.289	-0.105263	0.255	-3.68421	0.257	-3.47368
65	0.281	0.29	-0.526316	0.259	-3.78947	0.264	-3.26316
70	0.289	0.293	-1.05263	0.262	-4.31579	0.268	-3.68421
75	0.288	0.298	-0.421053	0.266	-3.78947	0.271	-3.26316
80	0.288	0.301	-0.105263	0.27	-3.36842	0.278	-2.52632
85	0.292	0.301	-0.526316	0.277	-3.05263	0.277	-3.05263
90	0.292	0.302	-0.421053	0.276	-3.15789	0.279	-2.84211
95	0.295	0.305	-0.421053	0.278	-3.26316	0.281	-2.94737
100	0.295	0.305	-0.421053	0.276	-3.47368	0.284	-2.63158
105	0.296	0.307	-0.315789	0.281	-3.05263	0.282	-2.94737
110	0.295	0.306	-0.315789	0.29	-2	0.285	-2.52632
115	0.297	0.311	1.27822e-15	0.284	-2.84211	0.284	-2.84211
120	0.3	0.309	-0.526316	0.279	-3.68421	0.286	-2.94737
125	0.298	0.31	-0.210526	0.281	-3.26316	0.285	-2.84211
130	0.301	0.308	-0.736842	0.282	-3.47368	0.286	-3.05263
135	0.298	0.307	-0.526316	0.285	-2.84211	0.286	-2.73684
140	0.299	0.309	-0.421053	0.284	-3.05263	0.287	-2.73684
145	0.298	0.31	-0.210526	0.285	-2.84211	0.286	-2.73684
150	0.303	0.306	-1.15789	0.286	-3.26316	0.286	-3.26316
155	0.3	0.307	-0.736842	0.284	-3.15789	0.286	-2.94737
160	0.3	0.307	-0.736842	0.284	-3.15789	0.284	-3.15789
165	0.299	0.308	-0.526316	0.284	-3.05263	0.286	-2.84211
170	0.3	0.305	-0.947368	0.283	-3.26316	0.285	-3.05263
175	0.301	0.305	-1.05263	0.285	-3.15789	0.285	-3.15789
180	0.301	0.304	-1.15789	0.287	-2.94737	0.286	-3.05263
185	0.297	0.306	-0.526316	0.284	-2.84211	0.287	-2.52632
190	0.297	0.305	-0.631579	0.285	-2.73684	0.285	-2.73684
195	0.299	0.304	-0.947368	0.287	-2.73684	0.284	-3.05263
200	0.301	0.305	-1.05263	0.287	-2.94737	0.284	-3.26316
205	0.3	0.306	-0.842105	0.282	-3.36842	0.285	-3.05263
210	0.299	0.304	-0.947368	0.282	-3.26316	0.284	-3.05263
215	0.299	0.304	-0.947368	0.282	-3.26316	0.283	-3.15789
220	0.298	0.303	-0.947368	0.286	-2.73684	0.286	-2.73684
225	0.3	0.304	-1.05263	0.283	-3.26316	0.285	-3.05263
230	0.301	0.302	-1.36842	0.283	-3.36842	0.283	-3.36842
235	0.304	0.306	-1.26316	0.284	-3.57895	0.284	-3.57895
240	0.3	0.306	-0.842105	0.283	-3.26316	0.285	-3.05263
245	0.297	-0.122	-45.5789	-0.8	-116.947	-0.822	-119.263
250	0.301	-0.804	-117.789	-0.801	-117.474	-0.822	-119.684
255	0.301	0.256	-6.21053	0.247	-7.15789	0.228	-9.15789
260	0.3	0.257	-6	0.26	-5.68421	0.233	-8.52632
265	0.299	0.264	-5.15789	0.26	-5.57895	0.244	-7.26316
270	0.299	0.27	-4.52632	0.265	-5.05263	0.254	-6.21053
275	0.3	0.28	-3.57895	0.266	-5.05263	0.267	-4.94737
280	0.302	0.284	-3.36842	0.271	-4.73684	0.275	-4.31579
285	0.302	0.293	-2.42105	0.276	-4.21053	0.287	-3.05263
290	0.301	0.302	-1.36842	0.283	-3.36842	0.293	-2.31579
295	0.301	0.312	-0.315789	0.289	-2.73684	0.304	-1.15789
300	0.298	0.318	0.631579	0.294	-1.89474	0.314	0.210526
305	0.299	0.327	1.47368	0.299	-1.47368	0.324	1.15789
310	0.3	0.339	2.63158	0.305	-0.947368	0.334	2.10526
315	0.302	0.346	3.15789	0.313	-0.315789	0.346	3.15789
320	0.303	0.352	3.68421	0.32	0.315789	0.357	4.21053
325	0.3	0.36	4.84211	0.327	1.36842	0.366	5.47368
330	0.304	0.371	5.57895	0.334	1.68421	0.377	6.21053
335	0.299	0.378	6.84211	0.339	2.73684	0.384	7.47368
340	0.302	0.386	7.36842	0.347	3.26316	0.394	8.21053
345	0.304	0.396	8.21053	0.356	4	0.402	8.84211
350	0.301	0.401	9.05263	0.363	5.05263	0.411	10.1053
355	0.3	0.414	10.5263	0.367	5.57895	0.423	11.4737
360	0.302	0.421	11.0526	0.376	6.31579	0.431	12.1053
365	0.301	0.426	11.6842	0.383	7.15789	0.439	13.0526
370	0.3	0.434	12.6316	0.388	7.78947	0.45	14.3158
375	0.303	0.443	13.2632	0.395	8.21053	0.458	14.8421
380	0.303	0.449	13.8947	0.4	8.73684	0.466	15.6842
385	0.301	0.455	14.7368	0.411	10.1053	0.474	16.7368
390	0.303	0.461	15.1579	0.418	10.6316	0.482	17.3684
395	0.304	0.471	16.1053	0.424	11.1579	0.49	18.1053
400	0.303	0.488	18	0.43	11.8947	0.497	18.9474
405	0.302	0.482	17.4737	0.437	12.7368	0.498	19.1579
410	0.3	0.487	18.2105	0.443	13.5789	0.512	20.8421
415	0.302	0.496	18.9474	0.449	14	0.521	21.5789
420	0.304	0.5	19.1579	0.459	14.8421	0.52	21.2632
425	0.302	0.503	19.6842	0.458	14.9474	0.53	22.5263
430	0.304	0.511	20.3158	0.465	15.4737	0.537	23.0526
435	0.303	0.515	20.8421	0.467	15.7895	0.541	23.5789
440	0.301	0.521	21.6842	0.476	16.9474	0.549	24.6316
445	0.3	0.524	22.1053	0.478	17.2632	0.552	25.0526
450	0.301	0.53	22.6316	0.485	17.8947	0.56	25.7895
455	0.304	0.534	22.7368	0.491	18.2105	0.564	25.8947
460	0.302	0.54	23.5789	0.494	18.7368	0.568	26.5263
465	0.301	0.544	24.1053	0.5	19.4737	0.574	27.2632
470	0.304	0.551	24.5263	0.505	19.6842	0.58	27.5789
475	0.304	0.553	24.7368	0.513	20.5263	0.582	27.7895
480	0.303	0.558	25.3684	0.514	20.7368	0.586	28.3158
485	0.302	0.557	25.3684	0.517	21.1579	0.591	28.9474
490	0.304	0.561	25.5789	0.523	21.5789	0.596	29.2632
495	0.302	0.573	27.0526	0.531	22.6316	0.602	30.1053
500	0.303	0.568	26.4211	0.532	22.6316	0.6	29.7895
505	0.303	0.58	27.6842	0.535	22.9474	0.61	30.8421
510	0.303	0.581	27.7895	0.538	23.2632	0.611	30.9474
515	0.302	0.582	28	0.544	24	0.616	31.5789
520	0.303	0.59	28.7368	0.547	24.2105	0.622	32.1053
525	0.313	0.588	27.4737	0.551	23.5789	0.627	31.5789
530	0.304	0.595	29.1579	0.554	24.8421	0.625	32.3158
535	0.304	0.597	29.3684	0.561	25.5789	0.632	33.0526
540	0.304	0.601	29.7895	0.566	26.1053	0.631	32.9474
545	0.304	0.607	30.4211	0.569	26.4211	0.636	33.4737
550	0.305	0.608	30.4211	0.571	26.5263	0.639	33.6842
555	0.302	0.607	30.6316	0.574	27.1579	0.64	34.1053
560	0.306	0.62	31.5789	0.578	27.1579	0.651	34.8421
565	0.304	0.62	31.7895	0.577	27.2632	0.648	34.7368
570	0.304	0.622	32	0.584	28	0.648	34.7368
575	0.302	0.626	32.6316	0.586	28.4211	0.653	35.4737
580	0.305	0.628	32.5263	0.596	29.1579	0.652	35.0526
585	0.307	0.633	32.8421	0.589	28.2105	0.657	35.3684
590	0.305	0.635	33.2632	0.597	29.2632	0.658	35.6842
595	0.304	0.637	33.5789	0.615	31.2632	0.662	36.2105
600	0.302	0.64	34.1053	0.598	29.6842	0.667	36.9474
605	0.308	0.641	33.5789	0.6	29.2632	0.666	36.2105
610	0.307	0.64	33.5789	0.607	30.1053	0.669	36.6316
615	0.302	0.645	34.6316	0.606	30.5263	0.672	37.4737
620	0.307	0.651	34.7368	0.604	29.7895	0.679	37.6842
625	0.307	0.65	34.6316	0.615	30.9474	0.67	36.7368
630	0.304	0.656	35.5789	0.619	31.6842	0.673	37.3684
635	0.305	0.66	35.8947	0.619	31.5789	0.677	37.6842
640	0.305	0.658	35.6842	0.623	32	0.678	37.7895
645	0.308	0.659	35.4737	0.618	31.1579	0.681	37.7895
650	0.307	0.668	36.5263	0.629	32.4211	0.679	37.6842
655	0.305	0.666	36.5263	0.628	32.5263	0.683	38.3158
660	0.308	0.672	36.8421	0.628	32.2105	0.69	38.7368
665	0.304	0.675	37.5789	0.636	33.4737	0.687	38.8421
670	0.308	0.668	36.4211	0.634	32.8421	0.686	38.3158
675	0.308	0.674	37.0526	0.633	32.7368	0.686	38.3158
680	0.307	0.68	37.7895	0.642	33.7895	0.692	39.0526
685	0.308	0.686	38.3158	0.638	33.2632	0.69	38.7368
690	0.306	0.683	38.2105	0.644	34.1053	0.695	39.4737
695	0.308	0.688	38.5263	0.65	34.5263	0.693	39.0526
700	0.307	0.689	38.7368	0.65	34.6316	0.698	39.6842
705	0.306	0.69	38.9474	0.653	35.0526	0.694	39.3684
710	0.308	0.692	38.9474	0.65	34.5263	0.696	39.3684
715	0.309	0.687	38.3158	0.657	35.1579	0.695	39.1579
720	0.308	0.695	39.2632	0.653	34.8421	0.699	39.6842
725	0.308	0.699	39.6842	0.664	36	0.7	39.7895
730	0.307	0.698	39.6842	0.659	35.5789	0.707	40.6316
735	0.307	0.703	40.2105	0.664	36.1053	0.699	39.7895
740	0.308	0.699	39.6842	0.667	36.3158	0.702	40
745	0.308	0.705	40.3158	0.665	36.1053	0.708	40.6316
750	0.309	0.71	40.7368	0.673	36.8421	0.705	40.2105
755	0.306	0.701	40.1053	0.671	36.9474	0.704	40.4211
760	0.308	0.707	40.5263	0.677	37.3684	0.709	40.7368
765	0.308	0.709	40.7368	0.678	37.4737	0.708	40.6316
770	0.309	0.709	40.6316	0.674	36.9474	0.707	40.4211
775	0.309	0.717	41.4737	0.68	37.5789	0.71	40.7368
780	0.31	0.716	41.2632	0.678	37.2632	0.712	40.8421
785	0.309	0.724	42.2105	0.681	37.6842	0.71	40.7368
790	0.311	0.715	41.0526	0.69	38.4211	0.711	40.6316
795	0.31	0.72	41.6842	0.689	38.4211	0.709	40.5263
800	0.309	0.728	42.6316	0.686	38.2105	0.719	41.6842
805	0.309	0.725	42.3158	0.688	38.4211	0.711	40.8421
810	0.308	0.727	42.6316	0.69	38.7368	0.716	41.4737
815	0.311	0.727	42.3158	0.691	38.5263	0.72	41.5789
820	0.306	0.725	42.6316	0.692	39.1579	0.715	41.5789
825	0.309	0.721	41.8947	0.695	39.1579	0.72	41.7895
830	0.31	0.731	42.8421	0.697	39.2632	0.72	41.6842
835	0.313	0.728	42.2105	0.697	38.9474	0.718	41.1579
840	0.317	0.73	42	0.7	38.8421	0.72	40.9474
845	0.31	0.723	42	0.699	39.4737	0.721	41.7895
850	0.309	0.732	43.0526	0.71	40.7368	0.722	42
855	0.309	0.738	43.6842	0.705	40.2105	0.726	42.4211
860	0.309	0.731	42.9474	0.707	40.4211	0.725	42.3158
865	0.311	0.738	43.4737	0.71	40.5263	0.728	42.4211
870	0.309	0.737	43.5789	0.711	40.8421	0.721	41.8947
875	0.307	0.732	43.2632	0.711	41.0526	0.731	43.1579
880	0.309	0.736	43.4737	0.718	41.5789	0.731	42.9474
885	0.309	0.747	44.6316	0.718	41.5789	0.724	42.2105
890	0.309	0.738	43.6842	0.72	41.7895	0.727	42.5263
895	0.311	0.742	43.8947	0.718	41.3684	0.731	42.7368
900	0.31	0.742	44	0.721	41.7895	0.735	43.2632
905	0.31	0.742	44	0.717	41.3684	0.732	42.9474
910	0.312	0.746	44.2105	0.725	42	0.734	42.9474
915	0.312	0.741	43.6842	0.718	41.2632	0.74	43.5789
920	0.311	0.741	43.7895	0.726	42.2105	0.732	42.8421
925	0.31	0.747	44.5263	0.722	41.8947	0.735	43.2632
930	0.312	0.747	44.3158	0.735	43.0526	0.736	43.1579
935	0.31	0.74	43.7895	0.728	42.5263	0.738	43.5789
940	0.31	0.745	44.3158	0.735	43.2632	0.736	43.3684
945	0.311	0.752	44.9474	0.736	43.2632	0.733	42.9474
950	0.315	0.744	43.6842	0.723	41.4737	0.737	42.9474
955	0.311	0.749	44.6316	0.734	43.0526	0.743	44
960	0.313	0.746	44.1053	0.733	42.7368	0.743	43.7895
965	0.31	0.751	44.9474	0.737	43.4737	0.742	44
970	0.311	0.742	43.8947	0.737	43.3684	0.741	43.7895
975	0.311	0.747	44.4211	0.738	43.4737	0.743	44
980	0.314	0.747	44.1053	0.739	43.2632	0.745	43.8947
985	0.31	0.748	44.6316	0.735	43.2632	0.744	44.2105
990	0.313	0.755	45.0526	0.74	43.4737	0.75	44.5263
995	0.31	0.752	45.0526	0.743	44.1053	0.747	44.5263
1000	0.312	0.763	46	0.748	44.4211	0.748	44.4211
1005	0.311	0.762	46	0.738	43.4737	0.749	44.6316
1010	0.313	0.766	46.2105	0.741	43.5789	0.751	44.6316
1015	0.314	0.762	45.6842	0.746	44	0.749	44.3158
1020	0.313	0.762	45.7895	0.742	43.6842	0.751	44.6316
1025	0.313	0.769	46.5263	0.745	44	0.754	44.9474
1030	0.31	0.767	46.6316	0.748	44.6316	0.749	44.7368
1035	0.312	0.774	47.1579	0.749	44.5263	0.749	44.5263
1040	0.312	0.774	47.1579	0.746	44.2105	0.756	45.2632
1045	0.312	0.767	46.4211	0.747	44.3158	0.752	44.8421
1050	0.314	0.774	46.9474	0.755	44.9474	0.759	45.3684
1055	0.311	0.774	47.2632	0.756	45.3684	0.764	46.2105
1060	0.312	0.783	48.1053	0.747	44.3158	0.756	45.2632
1065	0.315	0.784	47.8947	0.749	44.2105	0.759	45.2632
1070	0.313	0.773	46.9474	0.758	45.3684	0.755	45.0526
1075	0.313	0.779	47.5789	0.762	45.7895	0.757	45.2632
1080	0.314	0.781	47.6842	0.76	45.4737	0.764	45.8947
1085	0.309	0.776	47.6842	0.762	46.2105	0.76	46
1090	0.313	0.777	47.3684	0.76	45.5789	0.758	45.3684
1095	0.312	0.786	48.4211	0.769	46.6316	0.765	46.2105
1100	0.313	0.777	47.3684	0.763	45.8947	0.766	46.2105
1105	0.315	0.785	48	0.767	46.1053	0.767	46.1053
1110	0.313	0.786	48.3158	0.771	46.7368	0.771	46.7368
1115	0.312	0.781	47.8947	0.772	46.9474	0.769	46.6316
1120	0.313	0.788	48.5263	0.776	47.2632	0.765	46.1053
1125	0.314	0.786	48.2105	0.768	46.3158	0.767	46.2105
1130	0.311	0.781	48	0.774	47.2632	0.777	47.5789
1135	0.313	0.791	48.8421	0.779	47.5789	0.766	46.2105
1140	0.312	0.783	48.1053	0.772	46.9474	0.775	47.2632
1145	0.313	0.796	49.3684	0.783	48	0.781	47.7895
1150	0.313	0.792	48.9474	0.787	48.4211	0.777	47.3684
1155	0.313	0.797	49.4737	0.784	48.1053	0.773	46.9474
1160	0.312	0.788	48.6316	0.789	48.7368	0.767	46.4211
1165	0.314	0.79	48.6316	0.786	48.2105	0.775	47.0526
1170	0.31	0.798	49.8947	0.788	48.8421	0.774	47.3684
1175	0.312	0.805	50.4211	0.792	49.0526	0.775	47.2632
1180	0.313	0.795	49.2632	0.785	48.2105	0.776	47.2632
1185	0.314	0.808	50.5263	0.795	49.1579	0.777	47.2632
1190	0.314	0.795	49.1579	0.795	49.1579	0.781	47.6842
1195	0.314	0.797	49.3684	0.8	49.6842	0.785	48.1053
1200	0.314	0.799	49.5789	0.797	49.3684	0.782	47.7895
1205	0.314	0.797	49.3684	0.792	48.8421	0.784	48
1210	0.315	0.804	50	0.806	50.2105	0.784	47.8947
1215	0.316	0.802	49.6842	0.804	49.8947	0.785	47.8947
1220	0.316	0.804	49.8947	0.798	49.2632	0.78	47.3684
1225	0.314	0.807	50.4211	0.806	50.3158	0.782	47.7895
1230	0.315	0.804	50	0.803	49.8947	0.788	48.3158
1235	0.317	0.809	50.3158	0.807	50.1053	0.783	47.5789
1240	0.313	0.813	51.1579	0.806	50.4211	0.789	48.6316
1245	0.314	0.807	50.4211	0.818	51.5789	0.786	48.2105
1250	0.315	0.804	50	0.817	51.3684	0.789	48.4211
1255	0.316	0.812	50.7368	0.81	50.5263	0.792	48.6316
1260	0.316	0.815	51.0526	0.812	50.7368	0.791	48.5263
1265	0.313	0.816	51.4737	0.818	51.6842	0.79	48.7368
1270	0.315	0.806	50.2105	0.813	50.9474	0.793	48.8421
1275	0.316	0.82	51.5789	0.814	50.9474	0.788	48.2105
1280	0.315	0.819	51.5789	0.822	51.8947	0.794	48.9474
1285	0.315	0.822	51.8947	0.815	51.1579	0.788	48.3158
1290	0.314	0.816	51.3684	0.824	52.2105	0.794	49.0526
1295	0.317	0.821	51.5789	0.82	51.4737	0.798	49.1579
1300	0.314	0.817	51.4737	0.817	51.4737	0.794	49.0526
1305	0.316	0.815	51.0526	0.816	51.1579	0.799	49.3684
1310	0.313	0.82	51.8947	0.818	51.6842	0.795	49.2632
1315	0.314	0.817	51.4737	0.82	51.7895	0.799	49.5789
1320	0.315	0.821	51.7895	0.822	51.8947	0.799	49.4737
1325	0.315	0.818	51.4737	0.822	51.8947	0.799	49.4737
1330	0.313	0.82	51.8947	0.826	52.5263	0.797	49.4737
1335	0.316	0.817	51.2632	0.828	52.4211	0.794	48.8421
1340	0.314	0.824	52.2105	0.815	51.2632	0.798	49.4737
1345	0.315	0.821	51.7895	0.825	52.2105	0.795	49.0526
1350	0.315	0.818	51.4737	0.831	52.8421	0.796	49.1579
1355	0.316	0.817	51.2632	0.829	52.5263	0.8	49.4737
1360	0.315	0.824	52.1053	0.829	52.6316	0.811	50.7368
1365	0.316	0.819	51.4737	0.825	52.1053	0.801	49.5789
1370	0.317	0.821	51.5789	0.827	52.2105	0.802	49.5789
1375	0.315	0.822	51.8947	0.829	52.6316	0.804	50
1380	0.317	0.823	51.7895	0.823	51.7895	0.798	49.1579
1385	0.313	0.825	52.4211	0.835	53.4737	0.802	50
1390	0.315	0.828	52.5263	0.836	53.3684	0.81	50.6316
1395	0.318	0.821	51.4737	0.827	52.1053	0.808	50.1053
1400	0.314	0.821	51.8947	0.83	52.8421	0.806	50.3158
1405	0.318	0.834	52.8421	0.83	52.4211	0.81	50.3158
1410	0.316	0.83	52.6316	0.832	52.8421	0.804	49.8947
1415	0.317	0.822	51.6842	0.83	52.5263	0.805	49.8947
1420	0.315	0.823	52	0.825	52.2105	0.801	49.6842
1425	0.317	0.826	52.1053	0.837	53.2632	0.811	50.5263
1430	0.319	0.824	51.6842	0.833	52.6316	0.811	50.3158
1435	0.317	0.831	52.6316	0.839	53.4737	0.802	49.5789
1440	0.315	0.833	53.0526	0.831	52.8421	0.804	50
1445	0.319	0.83	52.3158	0.836	52.9474	0.817	50.9474
1450	0.315	0.833	53.0526	0.839	53.6842	0.81	50.6316
1455	0.316	0.823	51.8947	0.833	52.9474	0.807	50.2105
1460	0.318	0.823	51.6842	0.83	52.4211	0.806	49.8947
1465	0.317	0.822	51.6842	0.833	52.8421	0.805	49.8947
1470	0.317	0.834	52.9474	0.843	53.8947	0.814	50.8421
1475	0.315	0.834	53.1579	0.844	54.2105	0.813	50.9474
1480	0.317	0.826	52.1053	0.837	53.2632	0.807	50.1053
1485	0.314	0.828	52.6316	0.839	53.7895	0.813	51.0526
1490	0.314	0.825	52.3158	0.843	54.2105	0.815	51.2632
1495	0.317	0.829	52.4211	0.839	53.4737	0.816	51.0526
1500	0.317	0.83	52.5263	0.839	53.4737	0.815	50.9474
1505	0.314	0.827	52.5263	0.838	53.6842	0.815	51.2632
1510	0.317	0.829	52.4211	0.841	53.6842	0.816	51.0526
1515	0.313	0.828	52.7368	0.839	53.8947	0.814	51.2632
1520	0.316	0.839	53.5789	0.842	53.8947	0.817	51.2632
1525	0.317	0.832	52.7368	0.836	53.1579	0.814	50.8421
1530	0.316	0.839	53.5789	0.844	54.1053	0.816	51.1579
1535	0.318	0.828	52.2105	0.841	53.5789	0.815	50.8421
1540	0.317	0.833	52.8421	0.847	54.3158	0.821	51.5789
1545	0.318	0.833	52.7368	0.847	54.2105	0.825	51.8947
1550	0.315	0.834	53.1579	0.843	54.1053	0.816	51.2632
1555	0.317	0.826	52.1053	0.845	54.1053	0.814	50.8421
1560	0.316	0.84	53.6842	0.837	53.3684	0.824	52
1565	0.319	0.835	52.8421	0.844	53.7895	0.822	51.4737
1570	0.32	0.838	53.0526	0.842	53.4737	0.817	50.8421
1575	0.317	0.843	53.8947	0.847	54.3158	0.814	50.8421
1580	0.319	0.833	52.6316	0.849	54.3158	0.822	51.4737
1585	0.317	0.834	52.9474	0.842	53.7895	0.818	51.2632
1590	0.319	0.838	53.1579	0.851	54.5263	0.822	51.4737
1595	0.319	0.835	52.8421	0.847	54.1053	0.823	51.5789
1600	0.321	0.835	52.6316	0.844	53.5789	0.823	51.3684
1605	0.316	0.837	53.3684	0.852	54.9474	0.823	51.8947
1610	0.32	0.834	52.6316	0.848	54.1053	0.823	51.4737
1615	0.32	0.838	53.0526	0.848	54.1053	0.825	51.6842
1620	0.316	0.838	53.4737	0.847	54.4211	0.825	52.1053
1625	0.321	0.838	52.9474	0.847	53.8947	0.818	50.8421
1630	0.32	0.832	52.4211	0.851	54.4211	0.825	51.6842
1635	0.315	0.837	53.4737	0.846	54.4211	0.821	51.7895
1640	0.32	0.84	53.2632	0.856	54.9474	0.821	51.2632
1645	0.318	0.839	53.3684	0.855	55.0526	0.821	51.4737
1650	0.319	0.84	53.3684	0.853	54.7368	0.823	51.5789
1655	0.32	0.836	52.8421	0.853	54.6316	0.821	51.2632
1660	0.321	0.842	53.3684	0.854	54.6316	0.82	51.0526
1665	0.318	0.831	52.5263	0.854	54.9474	0.823	51.6842
1670	0.32	0.837	52.9474	0.855	54.8421	0.823	51.4737
1675	0.319	0.834	52.7368	0.85	54.4211	0.824	51.6842
1680	0.318	0.837	53.1579	0.858	55.3684	0.828	52.2105
1685	0.32	0.839	53.1579	0.854	54.7368	0.822	51.3684
1690	0.318	0.838	53.2632	0.853	54.8421	0.822	51.5789
1695	0.321	0.84	53.1579	0.852	54.4211	0.834	52.5263
1700	0.318	0.843	53.7895	0.853	54.8421	0.824	51.7895
1705	0.321	0.841	53.2632	0.859	55.1579	0.821	51.1579
1710	0.318	0.844	53.8947	0.86	55.5789	0.831	52.5263
1715	0.321	0.846	53.7895	0.856	54.8421	0.829	52
1720	0.321	0.846	53.7895	0.859	55.1579	0.825	51.5789
1725	0.32	0.847	54	0.857	55.0526	0.824	51.5789
1730	0.319	0.849	54.3158	0.856	55.0526	0.83	52.3158
1735	0.32	0.849	54.2105	0.856	54.9474	0.83	52.2105
1740	0.322	0.854	54.5263	0.857	54.8421	0.831	52.1053
1745	0.319	0.844	53.7895	0.853	54.7368	0.833	52.6316
1750	0.32	0.845	53.7895	0.852	54.5263	0.833	52.5263
1755	0.321	0.847	53.8947	0.857	54.9474	0.826	51.6842
1760	0.322	0.841	53.1579	0.852	54.3158	0.83	52
1765	0.319	0.848	54.2105	0.856	55.0526	0.833	52.6316
1770	0.322	0.85	54.1053	0.848	53.8947	0.835	52.5263
1775	0.318	0.848	54.3158	0.854	54.9474	0.832	52.6316
1780	0.321	0.849	54.1053	0.855	54.7368	0.836	52.7368
1785	0.321	0.85	54.2105	0.855	54.7368	0.834	52.5263
1790	0.323	0.855	54.5263	0.859	54.9474	0.835	52.4211
1795	0.32	0.85	54.3158	0.859	55.2632	0.835	52.7368
1800	0.32	0.847	54	0.856	54.9474	0.832	52.4211

## Sheet: 3000Tu_LZ
Time (sec)	BG_OD360	1st_OD360	1st_ΔPi con. (μM)	2nd_OD360	2nd_ΔPi con. (μM)	3rd_OD360	3rd_ΔPi con. (μM)
	0.163	0.142		0.12		0.102
5	0.184	0.167	-3.26316	0.145	-5.57895	0.128	-7.36842
10	0.202	0.192	-2.52632	0.16	-5.89474	0.148	-7.15789
15	0.217	0.208	-2.42105	0.18	-5.36842	0.168	-6.63158
20	0.234	0.218	-3.15789	0.199	-5.15789	0.185	-6.63158
25	0.243	0.238	-2	0.208	-5.15789	0.197	-6.31579
30	0.255	0.25	-2	0.223	-4.84211	0.212	-6
35	0.264	0.26	-1.89474	0.233	-4.73684	0.223	-5.78947
40	0.271	0.273	-1.26316	0.244	-4.31579	0.234	-5.36842
45	0.278	0.28	-1.26316	0.251	-4.31579	0.242	-5.26316
50	0.285	0.283	-1.68421	0.262	-3.89474	0.252	-4.94737
55	0.293	0.293	-1.47368	0.266	-4.31579	0.257	-5.26316
60	0.293	0.295	-1.26316	0.272	-3.68421	0.263	-4.63158
65	0.296	0.299	-1.15789	0.278	-3.36842	0.267	-4.52632
70	0.301	0.301	-1.47368	0.281	-3.57895	0.272	-4.52632
75	0.304	0.308	-1.05263	0.283	-3.68421	0.277	-4.31579
80	0.309	0.304	-2	0.289	-3.57895	0.279	-4.63158
85	0.306	0.308	-1.26316	0.294	-2.73684	0.282	-4
90	0.31	0.311	-1.36842	0.294	-3.15789	0.282	-4.42105
95	0.309	0.309	-1.47368	0.297	-2.73684	0.286	-3.89474
100	0.31	0.312	-1.26316	0.298	-2.73684	0.287	-3.89474
105	0.31	0.312	-1.26316	0.298	-2.73684	0.288	-3.78947
110	0.313	0.312	-1.57895	0.301	-2.73684	0.29	-3.89474
115	0.315	0.312	-1.78947	0.303	-2.73684	0.29	-4.10526
120	0.313	0.316	-1.15789	0.303	-2.52632	0.291	-3.78947
125	0.316	0.309	-2.21053	0.305	-2.63158	0.292	-4
130	0.313	0.311	-1.68421	0.303	-2.52632	0.298	-3.05263
135	0.313	0.314	-1.36842	0.303	-2.52632	0.293	-3.57895
140	0.312	0.314	-1.26316	0.304	-2.31579	0.292	-3.57895
145	0.317	0.314	-1.78947	0.302	-3.05263	0.291	-4.21053
150	0.315	0.313	-1.68421	0.305	-2.52632	0.293	-3.78947
155	0.311	0.311	-1.47368	0.301	-2.52632	0.289	-3.78947
160	0.313	0.313	-1.47368	0.304	-2.42105	0.291	-3.78947
165	0.313	0.311	-1.68421	0.308	-2	0.291	-3.78947
170	0.314	0.31	-1.89474	0.301	-2.84211	0.291	-3.89474
175	0.313	0.31	-1.78947	0.306	-2.21053	0.293	-3.57895
180	0.315	0.309	-2.10526	0.305	-2.52632	0.292	-3.89474
185	0.311	0.311	-1.47368	0.305	-2.10526	0.292	-3.47368
190	0.314	0.314	-1.47368	0.303	-2.63158	0.29	-4
195	0.312	0.311	-1.57895	0.304	-2.31579	0.291	-3.68421
200	0.313	0.31	-1.78947	0.304	-2.42105	0.294	-3.47368
205	0.315	0.312	-1.78947	0.302	-2.84211	0.293	-3.78947
210	0.317	0.312	-2	0.303	-2.94737	0.293	-4
215	0.312	0.309	-1.78947	0.305	-2.21053	0.292	-3.57895
220	0.313	0.31	-1.78947	0.303	-2.52632	0.292	-3.68421
225	0.312	0.313	-1.36842	0.302	-2.52632	0.292	-3.57895
230	0.313	0.312	-1.57895	0.301	-2.73684	0.292	-3.68421
235	0.313	0.309	-1.89474	0.3	-2.84211	0.291	-3.78947
240	0.315	0.314	-1.57895	0.304	-2.63158	0.292	-3.89474
245	0.314	0.312	-1.68421	-0.799	-118.632	-0.823	-121.158
250	0.311	-0.805	-118.947	-0.799	-118.316	-0.822	-120.737
255	0.311	-0.804	-118.842	0.258	-7.05263	0.249	-8
260	0.314	0.278	-5.26316	0.271	-6	0.266	-6.52632
265	0.313	0.289	-4	0.284	-4.52632	0.275	-5.47368
270	0.313	0.297	-3.15789	0.294	-3.47368	0.282	-4.73684
275	0.315	0.304	-2.63158	0.308	-2.21053	0.294	-3.68421
280	0.312	0.315	-1.15789	0.321	-0.526316	0.302	-2.52632
285	0.314	0.32	-0.842105	0.333	0.526316	0.31	-1.89474
290	0.313	0.331	0.421053	0.35	2.42105	0.324	-0.315789
295	0.313	0.344	1.78947	0.369	4.42105	0.33	0.315789
300	0.313	0.354	2.84211	0.382	5.78947	0.344	1.78947
305	0.313	0.364	3.89474	0.397	7.36842	0.353	2.73684
310	0.313	0.377	5.26316	0.415	9.26316	0.363	3.78947
315	0.314	0.386	6.10526	0.427	10.4211	0.371	4.52632
320	0.313	0.398	7.47368	0.438	11.6842	0.385	6.10526
325	0.315	0.415	9.05263	0.452	12.9474	0.395	6.94737
330	0.315	0.426	10.2105	0.464	14.2105	0.402	7.68421
335	0.315	0.436	11.2632	0.475	15.3684	0.413	8.84211
340	0.315	0.45	12.7368	0.486	16.5263	0.425	10.1053
345	0.313	0.456	13.5789	0.498	18	0.434	11.2632
350	0.313	0.473	15.3684	0.511	19.3684	0.443	12.2105
355	0.314	0.478	15.7895	0.519	20.1053	0.454	13.2632
360	0.313	0.491	17.2632	0.53	21.3684	0.462	14.2105
365	0.315	0.499	17.8947	0.539	22.1053	0.471	14.9474
370	0.315	0.513	19.3684	0.548	23.0526	0.482	16.1053
375	0.315	0.519	20	0.558	24.1053	0.484	16.3158
380	0.312	0.529	21.3684	0.567	25.3684	0.499	18.2105
385	0.313	0.536	22	0.573	25.8947	0.507	18.9474
390	0.316	0.547	22.8421	0.58	26.3158	0.512	19.1579
395	0.313	0.558	24.3158	0.591	27.7895	0.523	20.6316
400	0.314	0.567	25.1579	0.599	28.5263	0.525	20.7368
405	0.312	0.568	25.4737	0.603	29.1579	0.531	21.5789
410	0.313	0.574	26	0.615	30.3158	0.544	22.8421
415	0.317	0.587	26.9474	0.617	30.1053	0.548	22.8421
420	0.315	0.587	27.1579	0.624	31.0526	0.553	23.5789
425	0.316	0.599	28.3158	0.629	31.4737	0.56	24.2105
430	0.316	0.61	29.4737	0.634	32	0.569	25.1579
435	0.314	0.61	29.6842	0.642	33.0526	0.569	25.3684
440	0.313	0.616	30.4211	0.647	33.6842	0.575	26.1053
445	0.315	0.626	31.2632	0.652	34	0.576	26
450	0.315	0.631	31.7895	0.659	34.7368	0.592	27.6842
455	0.316	0.636	32.2105	0.663	35.0526	0.589	27.2632
460	0.314	0.64	32.8421	0.662	35.1579	0.595	28.1053
465	0.316	0.643	32.9474	0.67	35.7895	0.601	28.5263
470	0.315	0.649	33.6842	0.672	36.1053	0.605	29.0526
475	0.315	0.646	33.3684	0.682	37.1579	0.608	29.3684
480	0.316	0.652	33.8947	0.685	37.3684	0.629	31.4737
485	0.313	0.654	34.4211	0.685	37.6842	0.617	30.5263
490	0.312	0.66	35.1579	0.684	37.6842	0.623	31.2632
495	0.313	0.665	35.5789	0.692	38.4211	0.619	30.7368
500	0.316	0.673	36.1053	0.695	38.4211	0.625	31.0526
505	0.316	0.672	36	0.697	38.6316	0.629	31.4737
510	0.317	0.673	36	0.696	38.4211	0.634	31.8947
515	0.316	0.681	36.9474	0.7	38.9474	0.637	32.3158
520	0.314	0.687	37.7895	0.699	39.0526	0.638	32.6316
525	0.327	0.687	36.4211	0.707	38.5263	0.639	31.3684
530	0.319	0.686	37.1579	0.706	39.2632	0.645	32.8421
535	0.316	0.694	38.3158	0.713	40.3158	0.65	33.6842
540	0.315	0.691	38.1053	0.715	40.6316	0.653	34.1053
545	0.318	0.699	38.6316	0.724	41.2632	0.654	33.8947
550	0.313	0.695	38.7368	0.711	40.4211	0.655	34.5263
555	0.318	0.695	38.2105	0.717	40.5263	0.657	34.2105
560	0.316	0.703	39.2632	0.722	41.2632	0.657	34.4211
565	0.316	0.701	39.0526	0.725	41.5789	0.663	35.0526
570	0.316	0.705	39.4737	0.731	42.2105	0.663	35.0526
575	0.318	0.704	39.1579	0.718	40.6316	0.663	34.8421
580	0.315	0.707	39.7895	0.728	42	0.67	35.8947
585	0.316	0.711	40.1053	0.733	42.4211	0.667	35.4737
590	0.317	0.717	40.6316	0.729	41.8947	0.671	35.7895
595	0.315	0.718	40.9474	0.736	42.8421	0.677	36.6316
600	0.316	0.72	41.0526	0.736	42.7368	0.678	36.6316
605	0.315	0.726	41.7895	0.735	42.7368	0.676	36.5263
610	0.316	0.721	41.1579	0.737	42.8421	0.677	36.5263
615	0.316	0.722	41.2632	0.743	43.4737	0.682	37.0526
620	0.317	0.726	41.5789	0.74	43.0526	0.686	37.3684
625	0.313	0.723	41.6842	0.743	43.7895	0.69	38.2105
630	0.317	0.725	41.4737	0.743	43.3684	0.689	37.6842
635	0.316	0.734	42.5263	0.748	44	0.685	37.3684
640	0.316	0.739	43.0526	0.746	43.7895	0.691	38
645	0.316	0.734	42.5263	0.748	44	0.687	37.5789
650	0.317	0.742	43.2632	0.75	44.1053	0.692	38
655	0.315	0.742	43.4737	0.747	44	0.699	38.9474
660	0.32	0.737	42.4211	0.754	44.2105	0.694	37.8947
665	0.317	0.751	44.2105	0.757	44.8421	0.699	38.7368
670	0.315	0.745	43.7895	0.755	44.8421	0.698	38.8421
675	0.315	0.753	44.6316	0.759	45.2632	0.702	39.2632
680	0.315	0.746	43.8947	0.753	44.6316	0.705	39.5789
685	0.319	0.751	44	0.761	45.0526	0.703	38.9474
690	0.318	0.746	43.5789	0.758	44.8421	0.704	39.1579
695	0.315	0.756	44.9474	0.754	44.7368	0.709	40
700	0.318	0.747	43.6842	0.76	45.0526	0.708	39.5789
705	0.316	0.754	44.6316	0.758	45.0526	0.713	40.3158
710	0.316	0.762	45.4737	0.767	46	0.713	40.3158
715	0.317	0.759	45.0526	0.771	46.3158	0.711	40
720	0.318	0.76	45.0526	0.767	45.7895	0.715	40.3158
725	0.319	0.756	44.5263	0.768	45.7895	0.716	40.3158
730	0.316	0.771	46.4211	0.773	46.6316	0.717	40.7368
735	0.317	0.763	45.4737	0.766	45.7895	0.721	41.0526
740	0.319	0.766	45.5789	0.77	46	0.721	40.8421
745	0.319	0.765	45.4737	0.77	46	0.721	40.8421
750	0.316	0.77	46.3158	0.772	46.5263	0.727	41.7895
755	0.317	0.765	45.6842	0.773	46.5263	0.727	41.6842
760	0.317	0.77	46.2105	0.782	47.4737	0.729	41.8947
765	0.316	0.771	46.4211	0.779	47.2632	0.731	42.2105
770	0.319	0.778	46.8421	0.784	47.4737	0.734	42.2105
775	0.315	0.779	47.3684	0.779	47.3684	0.732	42.4211
780	0.314	0.778	47.3684	0.777	47.2632	0.732	42.5263
785	0.317	0.772	46.4211	0.788	48.1053	0.729	41.8947
790	0.318	0.775	46.6316	0.779	47.0526	0.74	42.9474
795	0.318	0.78	47.1579	0.79	48.2105	0.735	42.4211
800	0.318	0.784	47.5789	0.786	47.7895	0.737	42.6316
805	0.318	0.782	47.3684	0.783	47.4737	0.738	42.7368
810	0.318	0.78	47.1579	0.789	48.1053	0.736	42.5263
815	0.318	0.785	47.6842	0.787	47.8947	0.743	43.2632
820	0.317	0.78	47.2632	0.794	48.7368	0.739	42.9474
825	0.318	0.785	47.6842	0.79	48.2105	0.74	42.9474
830	0.317	0.787	48	0.799	49.2632	0.748	43.8947
835	0.317	0.789	48.2105	0.786	47.8947	0.745	43.5789
840	0.316	0.794	48.8421	0.799	49.3684	0.748	44
845	0.317	0.797	49.0526	0.794	48.7368	0.745	43.5789
850	0.317	0.787	48	0.798	49.1579	0.745	43.5789
855	0.32	0.792	48.2105	0.806	49.6842	0.755	44.3158
860	0.318	0.789	48.1053	0.807	50	0.754	44.4211
865	0.318	0.796	48.8421	0.802	49.4737	0.755	44.5263
870	0.319	0.79	48.1053	0.796	48.7368	0.759	44.8421
875	0.319	0.793	48.4211	0.805	49.6842	0.756	44.5263
880	0.321	0.797	48.6316	0.806	49.5789	0.757	44.4211
885	0.321	0.801	49.0526	0.808	49.7895	0.755	44.2105
890	0.318	0.797	48.9474	0.801	49.3684	0.766	45.6842
895	0.318	0.796	48.8421	0.812	50.5263	0.764	45.4737
900	0.318	0.794	48.6316	0.805	49.7895	0.764	45.4737
905	0.318	0.793	48.5263	0.818	51.1579	0.763	45.3684
910	0.32	0.795	48.5263	0.818	50.9474	0.753	44.1053
915	0.319	0.803	49.4737	0.81	50.2105	0.763	45.2632
920	0.319	0.804	49.5789	0.816	50.8421	0.766	45.5789
925	0.318	0.799	49.1579	0.816	50.9474	0.767	45.7895
930	0.318	0.808	50.1053	0.813	50.6316	0.763	45.3684
935	0.319	0.803	49.4737	0.813	50.5263	0.767	45.6842
940	0.319	0.806	49.7895	0.824	51.6842	0.768	45.7895
945	0.319	0.809	50.1053	0.824	51.6842	0.771	46.1053
950	0.317	0.799	49.2632	0.821	51.5789	0.769	46.1053
955	0.319	0.803	49.4737	0.825	51.7895	0.769	45.8947
960	0.321	0.808	49.7895	0.819	50.9474	0.776	46.4211
965	0.317	0.81	50.4211	0.817	51.1579	0.767	45.8947
970	0.318	0.814	50.7368	0.824	51.7895	0.777	46.8421
975	0.323	0.809	49.6842	0.827	51.5789	0.775	46.1053
980	0.32	0.81	50.1053	0.827	51.8947	0.775	46.4211
985	0.319	0.809	50.1053	0.824	51.6842	0.776	46.6316
990	0.322	0.818	50.7368	0.824	51.3684	0.781	46.8421
995	0.323	0.818	50.6316	0.828	51.6842	0.777	46.3158
1000	0.319	0.821	51.3684	0.828	52.1053	0.776	46.6316
1005	0.317	0.814	50.8421	0.839	53.4737	0.775	46.7368
1010	0.32	0.821	51.2632	0.836	52.8421	0.778	46.7368
1015	0.32	0.819	51.0526	0.829	52.1053	0.786	47.5789
1020	0.319	0.821	51.3684	0.833	52.6316	0.788	47.8947
1025	0.319	0.823	51.5789	0.828	52.1053	0.786	47.6842
1030	0.323	0.82	50.8421	0.839	52.8421	0.788	47.4737
1035	0.32	0.83	52.2105	0.838	53.0526	0.791	48.1053
1040	0.32	0.822	51.3684	0.831	52.3158	0.787	47.6842
1045	0.322	0.832	52.2105	0.836	52.6316	0.792	48
1050	0.323	0.827	51.5789	0.837	52.6316	0.788	47.4737
1055	0.323	0.828	51.6842	0.839	52.8421	0.788	47.4737
1060	0.322	0.83	52	0.837	52.7368	0.793	48.1053
1065	0.322	0.827	51.6842	0.84	53.0526	0.798	48.6316
1070	0.316	0.83	52.6316	0.837	53.3684	0.788	48.2105
1075	0.321	0.824	51.4737	0.835	52.6316	0.798	48.7368
1080	0.325	0.832	51.8947	0.847	53.4737	0.801	48.6316
1085	0.321	0.833	52.4211	0.845	53.6842	0.802	49.1579
1090	0.321	0.834	52.5263	0.845	53.6842	0.797	48.6316
1095	0.323	0.843	53.2632	0.843	53.2632	0.805	49.2632
1100	0.322	0.833	52.3158	0.847	53.7895	0.794	48.2105
1105	0.322	0.838	52.8421	0.851	54.2105	0.798	48.6316
1110	0.323	0.842	53.1579	0.844	53.3684	0.799	48.6316
1115	0.321	0.841	53.2632	0.846	53.7895	0.798	48.7368
1120	0.321	0.84	53.1579	0.85	54.2105	0.797	48.6316
1125	0.325	0.84	52.7368	0.848	53.5789	0.798	48.3158
1130	0.319	0.843	53.6842	0.843	53.6842	0.8	49.1579
1135	0.322	0.846	53.6842	0.847	53.7895	0.808	49.6842
1140	0.323	0.851	54.1053	0.841	53.0526	0.806	49.3684
1145	0.322	0.85	54.1053	0.843	53.3684	0.802	49.0526
1150	0.321	0.842	53.3684	0.841	53.2632	0.803	49.2632
1155	0.321	0.848	54	0.848	54	0.806	49.5789
1160	0.32	0.843	53.5789	0.844	53.6842	0.808	49.8947
1165	0.323	0.845	53.4737	0.856	54.6316	0.803	49.0526
1170	0.321	0.848	54	0.85	54.2105	0.808	49.7895
1175	0.322	0.849	54	0.848	53.8947	0.805	49.3684
1180	0.321	0.862	55.4737	0.854	54.6316	0.809	49.8947
1185	0.322	0.853	54.4211	0.853	54.4211	0.808	49.6842
1190	0.323	0.859	54.9474	0.844	53.3684	0.809	49.6842
1195	0.323	0.852	54.2105	0.849	53.8947	0.809	49.6842
1200	0.322	0.858	54.9474	0.851	54.2105	0.807	49.5789
1205	0.323	0.853	54.3158	0.85	54	0.809	49.6842
1210	0.322	0.853	54.4211	0.862	55.3684	0.813	50.2105
1215	0.322	0.864	55.5789	0.851	54.2105	0.804	49.2632
1220	0.323	0.869	56	0.852	54.2105	0.814	50.2105
1225	0.322	0.864	55.5789	0.858	54.9474	0.814	50.3158
1230	0.322	0.863	55.4737	0.855	54.6316	0.811	50
1235	0.32	0.856	54.9474	0.85	54.3158	0.813	50.4211
1240	0.324	0.86	54.9474	0.849	53.7895	0.818	50.5263
1245	0.323	0.865	55.5789	0.853	54.3158	0.815	50.3158
1250	0.322	0.866	55.7895	0.849	54	0.815	50.4211
1255	0.324	0.862	55.1579	0.859	54.8421	0.815	50.2105
1260	0.324	0.86	54.9474	0.861	55.0526	0.824	51.1579
1265	0.325	0.864	55.2632	0.858	54.6316	0.826	51.2632
1270	0.323	0.861	55.1579	0.869	56	0.82	50.8421
1275	0.326	0.866	55.3684	0.859	54.6316	0.818	50.3158
1280	0.325	0.86	54.8421	0.861	54.9474	0.818	50.4211
1285	0.325	0.862	55.0526	0.858	54.6316	0.82	50.6316
1290	0.321	0.859	55.1579	0.857	54.9474	0.827	51.7895
1295	0.322	0.865	55.6842	0.86	55.1579	0.824	51.3684
1300	0.321	0.865	55.7895	0.863	55.5789	0.823	51.3684
1305	0.323	0.86	55.0526	0.861	55.1579	0.831	52
1310	0.325	0.866	55.4737	0.863	55.1579	0.825	51.1579
1315	0.321	0.872	56.5263	0.853	54.5263	0.828	51.8947
1320	0.323	0.87	56.1053	0.856	54.6316	0.828	51.6842
1325	0.324	0.873	56.3158	0.865	55.4737	0.826	51.3684
1330	0.326	0.868	55.5789	0.858	54.5263	0.822	50.7368
1335	0.321	0.861	55.3684	0.856	54.8421	0.824	51.4737
1340	0.325	0.873	56.2105	0.865	55.3684	0.832	51.8947
1345	0.324	0.865	55.4737	0.867	55.6842	0.823	51.0526
1350	0.325	0.871	56	0.862	55.0526	0.827	51.3684
1355	0.321	0.868	56.1053	0.868	56.1053	0.829	52
1360	0.326	0.864	55.1579	0.852	53.8947	0.825	51.0526
1365	0.324	0.863	55.2632	0.867	55.6842	0.824	51.1579
1370	0.326	0.874	56.2105	0.87	55.7895	0.835	52.1053
1375	0.325	0.878	56.7368	0.864	55.2632	0.839	52.6316
1380	0.323	0.872	56.3158	0.86	55.0526	0.833	52.2105
1385	0.324	0.871	56.1053	0.861	55.0526	0.83	51.7895
1390	0.327	0.873	56	0.872	55.8947	0.83	51.4737
1395	0.324	0.874	56.4211	0.861	55.0526	0.839	52.7368
1400	0.326	0.87	55.7895	0.857	54.4211	0.832	51.7895
1405	0.324	0.876	56.6316	0.85	53.8947	0.834	52.2105
1410	0.324	0.875	56.5263	0.867	55.6842	0.825	51.2632
1415	0.327	0.874	56.1053	0.863	54.9474	0.837	52.2105
1420	0.323	0.875	56.6316	0.859	54.9474	0.831	52
1425	0.324	0.874	56.4211	0.857	54.6316	0.838	52.6316
1430	0.325	0.872	56.1053	0.866	55.4737	0.837	52.4211
1435	0.325	0.877	56.6316	0.865	55.3684	0.835	52.2105
1440	0.328	0.881	56.7368	0.864	54.9474	0.834	51.7895
1445	0.325	0.881	57.0526	0.857	54.5263	0.831	51.7895
1450	0.326	0.874	56.2105	0.861	54.8421	0.834	52
1455	0.325	0.879	56.8421	0.86	54.8421	0.837	52.4211
1460	0.324	0.882	57.2632	0.864	55.3684	0.84	52.8421
1465	0.325	0.879	56.8421	0.861	54.9474	0.834	52.1053
1470	0.326	0.881	56.9474	0.856	54.3158	0.835	52.1053
1475	0.324	0.891	58.2105	0.862	55.1579	0.841	52.9474
1480	0.324	0.878	56.8421	0.864	55.3684	0.835	52.3158
1485	0.326	0.888	57.6842	0.864	55.1579	0.84	52.6316
1490	0.323	0.885	57.6842	0.862	55.2632	0.832	52.1053
1495	0.328	0.884	57.0526	0.87	55.5789	0.843	52.7368
1500	0.329	0.89	57.5789	0.863	54.7368	0.835	51.7895
1505	0.325	0.882	57.1579	0.86	54.8421	0.837	52.4211
1510	0.328	0.88	56.6316	0.857	54.2105	0.84	52.4211
1515	0.325	0.882	57.1579	0.863	55.1579	0.838	52.5263
1520	0.327	0.888	57.5789	0.863	54.9474	0.833	51.7895
1525	0.326	0.89	57.8947	0.862	54.9474	0.837	52.3158
1530	0.324	0.895	58.6316	0.863	55.2632	0.838	52.6316
1535	0.324	0.895	58.6316	0.863	55.2632	0.839	52.7368
1540	0.327	0.888	57.5789	0.866	55.2632	0.837	52.2105
1545	0.324	0.88	57.0526	0.863	55.2632	0.839	52.7368
1550	0.328	0.882	56.8421	0.862	54.7368	0.844	52.8421
1555	0.326	0.89	57.8947	0.865	55.2632	0.84	52.6316
1560	0.329	0.884	56.9474	0.857	54.1053	0.842	52.5263
1565	0.327	0.894	58.2105	0.867	55.3684	0.851	53.6842
1570	0.327	0.886	57.3684	0.863	54.9474	0.84	52.5263
1575	0.327	0.889	57.6842	0.854	54	0.84	52.5263
1580	0.329	0.885	57.0526	0.861	54.5263	0.842	52.5263
1585	0.327	0.894	58.2105	0.866	55.2632	0.842	52.7368
1590	0.327	0.886	57.3684	0.857	54.3158	0.85	53.5789
1595	0.328	0.894	58.1053	0.86	54.5263	0.843	52.7368
1600	0.329	0.886	57.1579	0.87	55.4737	0.847	53.0526
1605	0.327	0.891	57.8947	0.872	55.8947	0.85	53.5789
1610	0.327	0.89	57.7895	0.866	55.2632	0.851	53.6842
1615	0.327	0.89	57.7895	0.866	55.2632	0.849	53.4737
1620	0.327	0.89	57.7895	0.869	55.5789	0.845	53.0526
1625	0.327	0.896	58.4211	0.864	55.0526	0.846	53.1579
1630	0.328	0.889	57.5789	0.864	54.9474	0.846	53.0526
1635	0.328	0.891	57.7895	0.865	55.0526	0.844	52.8421
1640	0.327	0.897	58.5263	0.863	54.9474	0.847	53.2632
1645	0.327	0.893	58.1053	0.871	55.7895	0.851	53.6842
1650	0.329	0.897	58.3158	0.861	54.5263	0.849	53.2632
1655	0.331	0.889	57.2632	0.866	54.8421	0.852	53.3684
1660	0.33	0.899	58.4211	0.863	54.6316	0.851	53.3684
1665	0.327	0.903	59.1579	0.869	55.5789	0.855	54.1053
1670	0.327	0.898	58.6316	0.874	56.1053	0.853	53.8947
1675	0.326	0.887	57.5789	0.871	55.8947	0.847	53.3684
1680	0.328	0.892	57.8947	0.87	55.5789	0.848	53.2632
1685	0.328	0.895	58.2105	0.871	55.6842	0.852	53.6842
1690	0.329	0.887	57.2632	0.877	56.2105	0.859	54.3158
1695	0.325	0.891	58.1053	0.866	55.4737	0.854	54.2105
1700	0.331	0.897	58.1053	0.863	54.5263	0.854	53.5789
1705	0.331	0.896	58	0.865	54.7368	0.857	53.8947
1710	0.33	0.888	57.2632	0.861	54.4211	0.86	54.3158
1715	0.327	0.902	59.0526	0.862	54.8421	0.861	54.7368
1720	0.331	0.897	58.1053	0.878	56.1053	0.856	53.7895
1725	0.329	0.895	58.1053	0.87	55.4737	0.854	53.7895
1730	0.33	0.903	58.8421	0.871	55.4737	0.851	53.3684
1735	0.331	0.896	58	0.878	56.1053	0.86	54.2105
1740	0.331	0.898	58.2105	0.863	54.5263	0.86	54.2105
1745	0.331	0.892	57.5789	0.865	54.7368	0.852	53.3684
1750	0.33	0.888	57.2632	0.87	55.3684	0.854	53.6842
1755	0.33	0.898	58.3158	0.861	54.4211	0.861	54.4211
1760	0.331	0.904	58.8421	0.875	55.7895	0.849	53.0526
1765	0.331	0.902	58.6316	0.867	54.9474	0.858	54
1770	0.33	0.903	58.8421	0.88	56.4211	0.858	54.1053
1775	0.329	0.908	59.4737	0.872	55.6842	0.861	54.5263
1780	0.329	0.902	58.8421	0.874	55.8947	0.857	54.1053
1785	0.328	0.898	58.5263	0.881	56.7368	0.852	53.6842
1790	0.334	0.906	58.7368	0.869	54.8421	0.856	53.4737
1795	0.333	0.904	58.6316	0.876	55.6842	0.868	54.8421
1800	0.329	0.899	58.5263	0.857	54.1053	0.855	53.8947

## Sheet: 10000Tu_LZ
Time (sec)	BG_OD360	1st_OD360	1st_ΔPi con. (μM)	2nd_OD360	2nd_ΔPi con. (μM)	3rd_OD360	3rd_ΔPi con. (μM)
	0.177	0.182		0.18		0.162
5	0.2	0.202	-1.26316	0.2	-1.47368	0.18	-3.57895
10	0.219	0.223	-1.05263	0.22	-1.36842	0.199	-3.57895
15	0.237	0.237	-1.47368	0.236	-1.57895	0.217	-3.57895
20	0.252	0.251	-1.57895	0.252	-1.47368	0.232	-3.57895
25	0.266	0.264	-1.68421	0.266	-1.47368	0.245	-3.68421
30	0.275	0.276	-1.36842	0.281	-0.842105	0.261	-2.94737
35	0.295	0.285	-2.52632	0.291	-1.89474	0.27	-4.10526
40	0.305	0.293	-2.73684	0.303	-1.68421	0.281	-4
45	0.305	0.3	-2	0.313	-0.631579	0.292	-2.84211
50	0.316	0.312	-1.89474	0.323	-0.736842	0.299	-3.26316
55	0.326	0.317	-2.42105	0.329	-1.15789	0.31	-3.15789
60	0.329	0.324	-2	0.342	-0.105263	0.316	-2.84211
65	0.34	0.325	-3.05263	0.346	-0.842105	0.322	-3.36842
70	0.345	0.332	-2.84211	0.352	-0.736842	0.328	-3.26316
75	0.345	0.333	-2.73684	0.358	-0.105263	0.333	-2.73684
80	0.355	0.339	-3.15789	0.362	-0.736842	0.337	-3.36842
85	0.354	0.34	-2.94737	0.368	1.27822e-15	0.341	-2.84211
90	0.356	0.34	-3.15789	0.376	0.631579	0.346	-2.52632
95	0.363	0.346	-3.26316	0.376	-0.105263	0.347	-3.15789
100	0.363	0.343	-3.57895	0.378	0.105263	0.35	-2.84211
105	0.364	0.347	-3.26316	0.378	1.27822e-15	0.355	-2.42105
110	0.363	0.346	-3.26316	0.38	0.315789	0.355	-2.31579
115	0.364	0.346	-3.36842	0.386	0.842105	0.353	-2.63158
120	0.37	0.35	-3.57895	0.387	0.315789	0.359	-2.63158
125	0.368	0.35	-3.36842	0.388	0.631579	0.358	-2.52632
130	0.373	0.35	-3.89474	0.389	0.210526	0.361	-2.73684
135	0.368	0.352	-3.15789	0.391	0.947368	0.361	-2.21053
140	0.371	0.351	-3.57895	0.395	1.05263	0.362	-2.42105
145	0.37	0.352	-3.36842	0.393	0.947368	0.363	-2.21053
150	0.371	0.35	-3.68421	0.393	0.842105	0.362	-2.42105
155	0.369	0.354	-3.05263	0.395	1.26316	0.366	-1.78947
160	0.372	0.354	-3.36842	0.393	0.736842	0.365	-2.21053
165	0.37	0.354	-3.15789	0.396	1.26316	0.362	-2.31579
170	0.371	0.356	-3.05263	0.394	0.947368	0.368	-1.78947
175	0.369	0.352	-3.26316	0.398	1.57895	0.362	-2.21053
180	0.374	0.353	-3.68421	0.397	0.947368	0.367	-2.21053
185	0.374	0.353	-3.68421	0.394	0.631579	0.365	-2.42105
190	0.374	0.353	-3.68421	0.394	0.631579	0.366	-2.31579
195	0.369	0.354	-3.05263	0.398	1.57895	0.368	-1.57895
200	0.372	0.355	-3.26316	0.396	1.05263	0.366	-2.10526
205	0.374	0.352	-3.78947	0.395	0.736842	0.369	-2
210	0.366	0.357	-2.42105	0.398	1.89474	0.365	-1.57895
215	0.372	0.353	-3.47368	0.395	0.947368	0.368	-1.89474
220	0.373	0.355	-3.36842	0.398	1.15789	0.364	-2.42105
225	0.375	0.354	-3.68421	0.398	0.947368	0.367	-2.31579
230	0.373	0.355	-3.36842	0.4	1.36842	0.366	-2.21053
235	0.367	0.353	-2.94737	0.396	1.57895	0.367	-1.47368
240	0.369	0.355	-2.94737	0.397	1.47368	0.368	-1.57895
245	0.371	-0.807	-125.474	-0.8	-124.737	-0.813	-126.105
250	0.374	-0.807	-125.789	-0.798	-124.842	-0.821	-127.263
255	0.372	0.32	-6.94737	0.353	-3.47368	0.342	-4.63158
260	0.37	0.332	-5.47368	0.353	-3.26316	0.343	-4.31579
265	0.371	0.343	-4.42105	0.365	-2.10526	0.354	-3.26316
270	0.375	0.349	-4.21053	0.382	-0.736842	0.364	-2.63158
275	0.373	0.364	-2.42105	0.396	0.947368	0.377	-1.05263
280	0.373	0.373	-1.47368	0.409	2.31579	0.395	0.842105
285	0.377	0.388	-0.315789	0.423	3.36842	0.405	1.47368
290	0.373	0.397	1.05263	0.441	5.68421	0.423	3.78947
295	0.372	0.412	2.73684	0.45	6.73684	0.438	5.47368
300	0.371	0.421	3.78947	0.465	8.42105	0.452	7.05263
305	0.376	0.438	5.05263	0.48	9.47368	0.463	7.68421
310	0.374	0.446	6.10526	0.498	11.5789	0.477	9.36842
315	0.376	0.461	7.47368	0.512	12.8421	0.492	10.7368
320	0.374	0.472	8.84211	0.524	14.3158	0.503	12.1053
325	0.375	0.485	10.1053	0.541	16	0.516	13.3684
330	0.373	0.498	11.6842	0.553	17.4737	0.526	14.6316
335	0.373	0.512	13.1579	0.566	18.8421	0.537	15.7895
340	0.37	0.521	14.4211	0.576	20.2105	0.552	17.6842
345	0.372	0.537	15.8947	0.586	21.0526	0.563	18.6316
350	0.375	0.547	16.6316	0.599	22.1053	0.571	19.1579
355	0.373	0.553	17.4737	0.611	23.5789	0.582	20.5263
360	0.369	0.565	19.1579	0.625	25.4737	0.588	21.5789
365	0.37	0.573	19.8947	0.633	26.2105	0.595	22.2105
370	0.371	0.583	20.8421	0.641	26.9474	0.606	23.2632
375	0.372	0.59	21.4737	0.65	27.7895	0.611	23.6842
380	0.375	0.603	22.5263	0.655	28	0.624	24.7368
385	0.375	0.605	22.7368	0.666	29.1579	0.626	24.9474
390	0.371	0.61	23.6842	0.678	30.8421	0.633	26.1053
395	0.372	0.623	24.9474	0.677	30.6316	0.638	26.5263
400	0.372	0.632	25.8947	0.69	32	0.645	27.2632
405	0.378	0.64	26.1053	0.695	31.8947	0.654	27.5789
410	0.378	0.648	26.9474	0.702	32.6316	0.655	27.6842
415	0.371	0.652	28.1053	0.704	33.5789	0.66	28.9474
420	0.371	0.655	28.4211	0.708	34	0.665	29.4737
425	0.376	0.661	28.5263	0.712	33.8947	0.671	29.5789
430	0.371	0.667	29.6842	0.715	34.7368	0.673	30.3158
435	0.369	0.666	29.7895	0.716	35.0526	0.675	30.7368
440	0.376	0.674	29.8947	0.724	35.1579	0.689	31.4737
445	0.373	0.675	30.3158	0.731	36.2105	0.687	31.5789
450	0.37	0.683	31.4737	0.734	36.8421	0.69	32.2105
455	0.375	0.684	31.0526	0.736	36.5263	0.692	31.8947
460	0.376	0.685	31.0526	0.74	36.8421	0.693	31.8947
465	0.377	0.689	31.3684	0.739	36.6316	0.699	32.4211
470	0.375	0.696	32.3158	0.748	37.7895	0.702	32.9474
475	0.372	0.7	33.0526	0.753	38.6316	0.706	33.6842
480	0.377	0.699	32.4211	0.755	38.3158	0.705	33.0526
485	0.377	0.702	32.7368	0.754	38.2105	0.709	33.4737
490	0.374	0.707	33.5789	0.76	39.1579	0.711	34
495	0.376	0.709	33.5789	0.762	39.1579	0.709	33.5789
500	0.378	0.715	34	0.761	38.8421	0.712	33.6842
505	0.378	0.714	33.8947	0.769	39.6842	0.716	34.1053
510	0.378	0.717	34.2105	0.767	39.4737	0.714	33.8947
515	0.38	0.722	34.5263	0.774	40	0.717	34
520	0.381	0.712	33.3684	0.771	39.5789	0.723	34.5263
525	0.382	0.727	34.8421	0.776	40	0.724	34.5263
530	0.376	0.722	34.9474	0.781	41.1579	0.728	35.5789
535	0.375	0.727	35.5789	0.776	40.7368	0.726	35.4737
540	0.379	0.731	35.5789	0.78	40.7368	0.724	34.8421
545	0.38	0.726	34.9474	0.78	40.6316	0.73	35.3684
550	0.381	0.73	35.2632	0.786	41.1579	0.731	35.3684
555	0.377	0.734	36.1053	0.796	42.6316	0.736	36.3158
560	0.382	0.733	35.4737	0.793	41.7895	0.737	35.8947
565	0.378	0.738	36.4211	0.795	42.4211	0.738	36.4211
570	0.376	0.738	36.6316	0.792	42.3158	0.736	36.4211
575	0.378	0.742	36.8421	0.804	43.3684	0.737	36.3158
580	0.378	0.741	36.7368	0.799	42.8421	0.739	36.5263
585	0.38	0.74	36.4211	0.806	43.3684	0.74	36.4211
590	0.38	0.738	36.2105	0.806	43.3684	0.743	36.7368
595	0.378	0.746	37.2632	0.811	44.1053	0.742	36.8421
600	0.376	0.751	38	0.813	44.5263	0.749	37.7895
605	0.379	0.743	36.8421	0.808	43.6842	0.744	36.9474
610	0.379	0.75	37.5789	0.809	43.7895	0.75	37.5789
615	0.374	0.755	38.6316	0.816	45.0526	0.748	37.8947
620	0.377	0.756	38.4211	0.815	44.6316	0.745	37.2632
625	0.381	0.758	38.2105	0.815	44.2105	0.752	37.5789
630	0.387	0.751	36.8421	0.815	43.5789	0.758	37.5789
635	0.375	0.759	38.9474	0.816	44.9474	0.755	38.5263
640	0.382	0.759	38.2105	0.821	44.7368	0.758	38.1053
645	0.38	0.756	38.1053	0.819	44.7368	0.756	38.1053
650	0.376	0.761	39.0526	0.818	45.0526	0.759	38.8421
655	0.378	0.771	39.8947	0.823	45.3684	0.758	38.5263
660	0.377	0.764	39.2632	0.823	45.4737	0.762	39.0526
665	0.382	0.762	38.5263	0.823	44.9474	0.761	38.4211
670	0.379	0.76	38.6316	0.824	45.3684	0.768	39.4737
675	0.374	0.766	39.7895	0.825	46	0.762	39.3684
680	0.38	0.768	39.3684	0.828	45.6842	0.766	39.1579
685	0.384	0.774	39.5789	0.818	44.2105	0.764	38.5263
690	0.385	0.763	38.3158	0.818	44.1053	0.768	38.8421
695	0.376	0.766	39.5789	0.822	45.4737	0.768	39.7895
700	0.372	0.769	40.3158	0.827	46.4211	0.765	39.8947
705	0.38	0.768	39.3684	0.824	45.2632	0.773	39.8947
710	0.376	0.777	40.7368	0.826	45.8947	0.767	39.6842
715	0.378	0.78	40.8421	0.822	45.2632	0.772	40
720	0.376	0.775	40.5263	0.832	46.5263	0.773	40.3158
725	0.378	0.778	40.6316	0.827	45.7895	0.772	40
730	0.372	0.779	41.3684	0.829	46.6316	0.774	40.8421
735	0.374	0.779	41.1579	0.826	46.1053	0.773	40.5263
740	0.375	0.78	41.1579	0.829	46.3158	0.771	40.2105
745	0.375	0.778	40.9474	0.818	45.1579	0.773	40.4211
750	0.376	0.786	41.6842	0.834	46.7368	0.779	40.9474
755	0.375	0.791	42.3158	0.829	46.3158	0.78	41.1579
760	0.376	0.785	41.5789	0.828	46.1053	0.785	41.5789
765	0.378	0.773	40.1053	0.834	46.5263	0.777	40.5263
770	0.375	0.786	41.7895	0.831	46.5263	0.778	40.9474
775	0.376	0.786	41.6842	0.827	46	0.781	41.1579
780	0.379	0.788	41.5789	0.83	46	0.786	41.3684
785	0.375	0.788	42	0.838	47.2632	0.784	41.5789
790	0.375	0.781	41.2632	0.834	46.8421	0.783	41.4737
795	0.378	0.789	41.7895	0.835	46.6316	0.786	41.4737
800	0.376	0.784	41.4737	0.838	47.1579	0.785	41.5789
805	0.376	0.79	42.1053	0.831	46.4211	0.786	41.6842
810	0.377	0.79	42	0.836	46.8421	0.784	41.3684
815	0.375	0.787	41.8947	0.836	47.0526	0.785	41.6842
820	0.375	0.786	41.7895	0.826	46	0.786	41.7895
825	0.377	0.792	42.2105	0.838	47.0526	0.791	42.1053
830	0.379	0.799	42.7368	0.838	46.8421	0.788	41.5789
835	0.377	0.793	42.3158	0.833	46.5263	0.792	42.2105
840	0.376	0.794	42.5263	0.835	46.8421	0.785	41.5789
845	0.375	0.792	42.4211	0.834	46.8421	0.791	42.3158
850	0.376	0.793	42.4211	0.836	46.9474	0.794	42.5263
855	0.377	0.802	43.2632	0.836	46.8421	0.787	41.6842
860	0.377	0.798	42.8421	0.846	47.8947	0.791	42.1053
865	0.377	0.799	42.9474	0.851	48.4211	0.791	42.1053
870	0.376	0.807	43.8947	0.836	46.9474	0.794	42.5263
875	0.376	0.795	42.6316	0.842	47.5789	0.797	42.8421
880	0.375	0.801	43.3684	0.842	47.6842	0.797	42.9474
885	0.378	0.796	42.5263	0.838	46.9474	0.796	42.5263
890	0.377	0.797	42.7368	0.834	46.6316	0.798	42.8421
895	0.377	0.802	43.2632	0.844	47.6842	0.798	42.8421
900	0.381	0.795	42.1053	0.846	47.4737	0.804	43.0526
905	0.373	0.801	43.5789	0.846	48.3158	0.797	43.1579
910	0.376	0.802	43.3684	0.846	48	0.805	43.6842
915	0.376	0.804	43.5789	0.844	47.7895	0.8	43.1579
920	0.379	0.807	43.5789	0.834	46.4211	0.802	43.0526
925	0.378	0.809	43.8947	0.846	47.7895	0.805	43.4737
930	0.378	0.813	44.3158	0.845	47.6842	0.8	42.9474
935	0.38	0.811	43.8947	0.833	46.2105	0.801	42.8421
940	0.379	0.809	43.7895	0.848	47.8947	0.803	43.1579
945	0.376	0.816	44.8421	0.847	48.1053	0.8	43.1579
950	0.381	0.813	44	0.844	47.2632	0.806	43.2632
955	0.379	0.809	43.7895	0.842	47.2632	0.805	43.3684
960	0.38	0.816	44.4211	0.849	47.8947	0.808	43.5789
965	0.378	0.813	44.3158	0.853	48.5263	0.808	43.7895
970	0.379	0.809	43.7895	0.847	47.7895	0.803	43.1579
975	0.378	0.813	44.3158	0.844	47.5789	0.809	43.8947
980	0.382	0.807	43.2632	0.854	48.2105	0.804	42.9474
985	0.378	0.819	44.9474	0.844	47.5789	0.806	43.5789
990	0.382	0.814	44	0.853	48.1053	0.803	42.8421
995	0.381	0.816	44.3158	0.848	47.6842	0.81	43.6842
1000	0.379	0.816	44.5263	0.857	48.8421	0.811	44
1005	0.38	0.821	44.9474	0.85	48	0.813	44.1053
1010	0.38	0.823	45.1579	0.846	47.5789	0.82	44.8421
1015	0.381	0.818	44.5263	0.855	48.4211	0.814	44.1053
1020	0.378	0.815	44.5263	0.853	48.5263	0.806	43.5789
1025	0.382	0.816	44.2105	0.853	48.1053	0.813	43.8947
1030	0.38	0.822	45.0526	0.858	48.8421	0.817	44.5263
1035	0.381	0.82	44.7368	0.854	48.3158	0.813	44
1040	0.38	0.824	45.2632	0.854	48.4211	0.814	44.2105
1045	0.382	0.824	45.0526	0.855	48.3158	0.811	43.6842
1050	0.381	0.824	45.1579	0.86	48.9474	0.82	44.7368
1055	0.379	0.825	45.4737	0.853	48.4211	0.825	45.4737
1060	0.383	0.829	45.4737	0.853	48	0.812	43.6842
1065	0.383	0.829	45.4737	0.85	47.6842	0.819	44.4211
1070	0.38	0.822	45.0526	0.858	48.8421	0.823	45.1579
1075	0.381	0.815	44.2105	0.856	48.5263	0.817	44.4211
1080	0.381	0.824	45.1579	0.856	48.5263	0.824	45.1579
1085	0.381	0.826	45.3684	0.861	49.0526	0.824	45.1579
1090	0.382	0.825	45.1579	0.858	48.6316	0.828	45.4737
1095	0.382	0.832	45.8947	0.855	48.3158	0.821	44.7368
1100	0.38	0.832	46.1053	0.869	50	0.831	46
1105	0.386	0.827	44.9474	0.858	48.2105	0.828	45.0526
1110	0.381	0.83	45.7895	0.854	48.3158	0.823	45.0526
1115	0.384	0.828	45.2632	0.858	48.4211	0.83	45.4737
1120	0.38	0.835	46.4211	0.858	48.8421	0.828	45.6842
1125	0.382	0.835	46.2105	0.857	48.5263	0.829	45.5789
1130	0.384	0.829	45.3684	0.853	47.8947	0.832	45.6842
1135	0.38	0.828	45.6842	0.858	48.8421	0.826	45.4737
1140	0.381	0.836	46.4211	0.86	48.9474	0.833	46.1053
1145	0.385	0.835	45.8947	0.858	48.3158	0.833	45.6842
1150	0.385	0.839	46.3158	0.859	48.4211	0.833	45.6842
1155	0.383	0.831	45.6842	0.853	48	0.838	46.4211
1160	0.38	0.833	46.2105	0.86	49.0526	0.837	46.6316
1165	0.379	0.845	47.5789	0.858	48.9474	0.833	46.3158
1170	0.38	0.836	46.5263	0.865	49.5789	0.826	45.4737
1175	0.384	0.84	46.5263	0.864	49.0526	0.836	46.1053
1180	0.383	0.842	46.8421	0.864	49.1579	0.835	46.1053
1185	0.384	0.838	46.3158	0.869	49.5789	0.833	45.7895
1190	0.385	0.838	46.2105	0.854	47.8947	0.834	45.7895
1195	0.385	0.837	46.1053	0.867	49.2632	0.829	45.2632
1200	0.381	0.845	47.3684	0.865	49.4737	0.835	46.3158
1205	0.382	0.833	46	0.873	50.2105	0.84	46.7368
1210	0.382	0.836	46.3158	0.868	49.6842	0.83	45.6842
1215	0.386	0.848	47.1579	0.861	48.5263	0.831	45.3684
1220	0.381	0.852	48.1053	0.867	49.6842	0.834	46.2105
1225	0.383	0.846	47.2632	0.865	49.2632	0.833	45.8947
1230	0.385	0.844	46.8421	0.869	49.4737	0.835	45.8947
1235	0.38	0.848	47.7895	0.866	49.6842	0.835	46.4211
1240	0.382	0.854	48.2105	0.861	48.9474	0.829	45.5789
1245	0.38	0.834	46.3158	0.859	48.9474	0.83	45.8947
1250	0.385	0.855	48	0.869	49.4737	0.833	45.6842
1255	0.386	0.846	46.9474	0.865	48.9474	0.831	45.3684
1260	0.382	0.838	46.5263	0.863	49.1579	0.837	46.4211
1265	0.379	0.843	47.3684	0.873	50.5263	0.837	46.7368
1270	0.384	0.845	47.0526	0.864	49.0526	0.832	45.6842
1275	0.386	0.85	47.3684	0.869	49.3684	0.834	45.6842
1280	0.387	0.847	46.9474	0.862	48.5263	0.833	45.4737
1285	0.384	0.849	47.4737	0.868	49.4737	0.837	46.2105
1290	0.387	0.847	46.9474	0.87	49.3684	0.831	45.2632
1295	0.386	0.859	48.3158	0.867	49.1579	0.834	45.6842
1300	0.386	0.849	47.2632	0.867	49.1579	0.839	46.2105
1305	0.385	0.852	47.6842	0.868	49.3684	0.829	45.2632
1310	0.386	0.851	47.4737	0.874	49.8947	0.835	45.7895
1315	0.384	0.857	48.3158	0.872	49.8947	0.833	45.7895
1320	0.383	0.854	48.1053	0.869	49.6842	0.832	45.7895
1325	0.385	0.858	48.3158	0.87	49.5789	0.835	45.8947
1330	0.385	0.863	48.8421	0.864	48.9474	0.838	46.2105
1335	0.386	0.86	48.4211	0.872	49.6842	0.837	46
1340	0.385	0.852	47.6842	0.864	48.9474	0.838	46.2105
1345	0.387	0.855	47.7895	0.871	49.4737	0.83	45.1579
1350	0.383	0.862	48.9474	0.868	49.5789	0.84	46.6316
1355	0.383	0.868	49.5789	0.87	49.7895	0.834	46
1360	0.387	0.862	48.5263	0.873	49.6842	0.843	46.5263
1365	0.387	0.854	47.6842	0.876	50	0.838	46
1370	0.386	0.864	48.8421	0.87	49.4737	0.843	46.6316
1375	0.385	0.863	48.8421	0.863	48.8421	0.84	46.4211
1380	0.386	0.856	48	0.873	49.7895	0.84	46.3158
1385	0.386	0.862	48.6316	0.871	49.5789	0.839	46.2105
1390	0.382	0.863	49.1579	0.871	50	0.833	46
1395	0.388	0.861	48.3158	0.866	48.8421	0.849	47.0526
1400	0.384	0.872	49.8947	0.863	48.9474	0.84	46.5263
1405	0.388	0.865	48.7368	0.872	49.4737	0.84	46.1053
1410	0.388	0.859	48.1053	0.872	49.4737	0.84	46.1053
1415	0.388	0.863	48.5263	0.876	49.8947	0.841	46.2105
1420	0.387	0.861	48.4211	0.872	49.5789	0.849	47.1579
1425	0.383	0.873	50.1053	0.875	50.3158	0.846	47.2632
1430	0.387	0.863	48.6316	0.867	49.0526	0.843	46.5263
1435	0.385	0.87	49.5789	0.863	48.8421	0.843	46.7368
1440	0.388	0.873	49.5789	0.875	49.7895	0.842	46.3158
1445	0.388	0.855	47.6842	0.869	49.1579	0.843	46.4211
1450	0.385	0.866	49.1579	0.862	48.7368	0.852	47.6842
1455	0.391	0.862	48.1053	0.873	49.2632	0.842	46
1460	0.39	0.866	48.6316	0.871	49.1579	0.856	47.5789
1465	0.39	0.863	48.3158	0.875	49.5789	0.848	46.7368
1470	0.385	0.861	48.6316	0.872	49.7895	0.852	47.6842
1475	0.389	0.859	48	0.875	49.6842	0.846	46.6316
1480	0.389	0.858	47.8947	0.872	49.3684	0.845	46.5263
1485	0.39	0.866	48.6316	0.869	48.9474	0.854	47.3684
1490	0.388	0.867	48.9474	0.876	49.8947	0.845	46.6316
1495	0.388	0.872	49.4737	0.878	50.1053	0.847	46.8421
1500	0.384	0.864	49.0526	0.88	50.7368	0.852	47.7895
1505	0.387	0.86	48.3158	0.867	49.0526	0.853	47.5789
1510	0.392	0.872	49.0526	0.884	50.3158	0.852	46.9474
1515	0.389	0.873	49.4737	0.878	50	0.843	46.3158
1520	0.391	0.868	48.7368	0.873	49.2632	0.851	46.9474
1525	0.39	0.869	48.9474	0.879	50	0.844	46.3158
1530	0.393	0.87	48.7368	0.872	48.9474	0.85	46.6316
1535	0.391	0.875	49.4737	0.877	49.6842	0.85	46.8421
1540	0.388	0.873	49.5789	0.88	50.3158	0.854	47.5789
1545	0.391	0.87	48.9474	0.878	49.7895	0.844	46.2105
1550	0.393	0.865	48.2105	0.869	48.6316	0.849	46.5263
1555	0.392	0.871	48.9474	0.884	50.3158	0.843	46
1560	0.393	0.866	48.3158	0.875	49.2632	0.859	47.5789
1565	0.391	0.878	49.7895	0.871	49.0526	0.85	46.8421
1570	0.391	0.865	48.4211	0.88	50	0.857	47.5789
1575	0.393	0.869	48.6316	0.874	49.1579	0.85	46.6316
1580	0.393	0.873	49.0526	0.869	48.6316	0.851	46.7368
1585	0.39	0.875	49.5789	0.876	49.6842	0.853	47.2632
1590	0.395	0.865	48	0.875	49.0526	0.848	46.2105
1595	0.395	0.87	48.5263	0.881	49.6842	0.852	46.6316
1600	0.391	0.87	48.9474	0.872	49.1579	0.855	47.3684
1605	0.391	0.866	48.5263	0.875	49.4737	0.853	47.1579
1610	0.392	0.864	48.2105	0.88	49.8947	0.853	47.0526
1615	0.393	0.859	47.5789	0.885	50.3158	0.849	46.5263
1620	0.394	0.87	48.6316	0.87	48.6316	0.849	46.4211
1625	0.394	0.869	48.5263	0.874	49.0526	0.85	46.5263
1630	0.391	0.871	49.0526	0.878	49.7895	0.85	46.8421
1635	0.396	0.871	48.5263	0.873	48.7368	0.85	46.3158
1640	0.394	0.876	49.2632	0.885	50.2105	0.851	46.6316
1645	0.398	0.866	47.7895	0.873	48.5263	0.858	46.9474
1650	0.396	0.873	48.7368	0.87	48.4211	0.846	45.8947
1655	0.394	0.872	48.8421	0.884	50.1053	0.847	46.2105
1660	0.397	0.867	48	0.876	48.9474	0.845	45.6842
1665	0.396	0.875	48.9474	0.879	49.3684	0.857	47.0526
1670	0.397	0.871	48.4211	0.885	49.8947	0.86	47.2632
1675	0.395	0.868	48.3158	0.88	49.5789	0.854	46.8421
1680	0.393	0.868	48.5263	0.876	49.3684	0.85	46.6316
1685	0.393	0.868	48.5263	0.877	49.4737	0.853	46.9474
1690	0.395	0.87	48.5263	0.877	49.2632	0.86	47.4737
1695	0.391	0.881	50.1053	0.881	50.1053	0.861	48
1700	0.412	0.875	47.2632	0.876	47.3684	0.859	45.5789
1705	0.397	0.88	49.3684	0.881	49.4737	0.858	47.0526
1710	0.393	0.88	49.7895	0.882	50	0.853	46.9474
1715	0.395	0.881	49.6842	0.879	49.4737	0.863	47.7895
1720	0.397	0.874	48.7368	0.884	49.7895	0.849	46.1053
1725	0.393	0.87	48.7368	0.884	50.2105	0.863	48
1730	0.393	0.88	49.7895	0.882	50	0.852	46.8421
1735	0.395	0.885	50.1053	0.875	49.0526	0.848	46.2105
1740	0.396	0.882	49.6842	0.874	48.8421	0.851	46.4211
1745	0.399	0.88	49.1579	0.883	49.4737	0.852	46.2105
1750	0.401	0.884	49.3684	0.877	48.6316	0.859	46.7368
1755	0.402	0.877	48.5263	0.885	49.3684	0.859	46.6316
1760	0.4	0.878	48.8421	0.874	48.4211	0.855	46.4211
1765	0.397	0.889	50.3158	0.883	49.6842	0.858	47.0526
1770	0.398	0.877	48.9474	0.88	49.2632	0.857	46.8421
1775	0.396	0.885	50	0.885	50	0.859	47.2632
1780	0.397	0.892	50.6316	0.88	49.3684	0.86	47.2632
1785	0.398	0.875	48.7368	0.885	49.7895	0.863	47.4737
1790	0.401	0.881	49.0526	0.885	49.4737	0.86	46.8421
1795	0.398	0.876	48.8421	0.887	50	0.854	46.5263
1800	0.401	0.879	48.8421	0.886	49.5789	0.858	46.6316

## Sheet: result
KLP-12(LZ) + GTP-tubulin (Tu)
GTP-Tu (nM)	100	300	1000	3000	10000
ATPase rate ( /s), 1st	0.0076	0.1106	0.1729	0.2395	0.2636
ATPase rate ( /s), 2nd	0.03	0.065	0.1417	0.3108	0.302
ATPase rate ( /s), 3rd	0.0208	0.0821	0.2034	0.2097	0.279
mean	0.0194667	0.0859	0.172667	0.253333	0.281533
SD	0.0112594	0.0230363	0.0308507	0.0519502	0.0193249
