# Supplementary material for: Structural model of microtubule dynamics inhibition by kinesin-4 from the crystal structure of KLP-12 –tubulin complex
Source: eLife. 2022 Sep 6;11:e77877. doi: 10.7554/eLife.77877 (PMC9451533; doi:10.7554/eLife.77877)
Supplement: Figure 3—source data 1. [file elife-77877-fig3-data1.xlsx]

## Sheet: Pi standard
Pi Conc. (μM)	OD360
0	0
25	0.2871
50	0.5441
100	1.0095

## Sheet: 100MT_Mo
Time (sec)	BG_OD360	1st_OD360	1st_ΔPi con. (μM)	2nd_OD360	2nd_ΔPi con. (μM)	3rd_OD360	3rd_ΔPi con. (μM)
	0.027	-0.011		0.001		-0.017
5	0.043	-0.003	-6.78	0.016	-4.88	0	-6.48
10	0.056	0.006	-7.18	0.028	-4.98	0.016	-6.18
15	0.068	0.014	-7.58	0.041	-4.88	0.026	-6.38
20	0.079	0.023	-7.78	0.051	-4.98	0.038	-6.28
25	0.092	0.032	-8.18	0.066	-4.78	0.048	-6.58
30	0.101	0.041	-8.18	0.078	-4.48	0.061	-6.18
35	0.114	0.051	-8.48	0.092	-4.38	0.071	-6.48
40	0.123	0.06	-8.48	0.104	-4.08	0.083	-6.18
45	0.136	0.069	-8.88	0.117	-4.08	0.092	-6.58
50	0.143	0.079	-8.58	0.128	-3.68	0.099	-6.58
55	0.152	0.086	-8.78	0.138	-3.58	0.109	-6.48
60	0.161	0.091	-9.18	0.148	-3.48	0.118	-6.48
65	0.167	0.099	-8.98	0.156	-3.28	0.123	-6.58
70	0.175	0.107	-8.98	0.166	-3.08	0.13	-6.68
75	0.182	0.115	-8.88	0.175	-2.88	0.135	-6.88
80	0.188	0.123	-8.68	0.182	-2.78	0.14	-6.98
85	0.195	0.125	-9.18	0.189	-2.78	0.146	-7.08
90	0.198	0.133	-8.68	0.196	-2.38	0.148	-7.18
95	0.203	0.14	-8.48	0.201	-2.38	0.153	-7.18
100	0.208	0.145	-8.48	0.209	-2.08	0.156	-7.38
105	0.213	0.148	-8.68	0.218	-1.68	0.163	-7.18
110	0.218	0.152	-8.78	0.222	-1.78	0.166	-7.38
115	0.221	0.156	-8.68	0.23	-1.28	0.171	-7.18
120	0.226	0.161	-8.68	0.238	-0.98	0.174	-7.38
125	0.231	0.166	-8.68	0.243	-0.98	0.179	-7.38
130	0.236	0.169	-8.88	0.247	-1.08	0.184	-7.38
135	0.239	0.176	-8.48	0.254	-0.68	0.187	-7.38
140	0.24	0.179	-8.28	0.256	-0.58	0.189	-7.28
145	0.244	0.182	-8.38	0.262	-0.38	0.196	-6.98
150	0.248	0.186	-8.38	0.265	-0.48	0.199	-7.08
155	0.247	0.189	-7.98	0.27	0.12	0.202	-6.68
160	0.252	0.192	-8.18	0.273	-0.08	0.203	-7.08
165	0.255	0.194	-8.28	0.277	0.02	0.208	-6.88
170	0.258	0.199	-8.08	0.281	0.12	0.209	-7.08
175	0.259	0.199	-8.18	0.282	0.12	0.223	-5.78
180	0.264	0.219	-6.68	0.287	0.12	0.216	-6.98
185	0.265	0.21	-7.68	0.289	0.22	0.22	-6.68
190	0.269	0.211	-7.98	0.291	0.02	0.218	-7.28
195	0.269	0.214	-7.68	0.292	0.12	0.222	-6.88
200	0.271	0.219	-7.38	0.295	0.22	0.225	-6.78
205	0.274	0.222	-7.38	0.298	0.22	0.227	-6.88
210	0.279	0.226	-7.48	0.302	0.12	0.229	-7.18
215	0.278	0.227	-7.28	0.304	0.42	0.233	-6.68
220	0.279	0.232	-6.88	0.305	0.42	0.235	-6.58
225	0.28	0.23	-7.18	0.305	0.32	0.238	-6.38
230	0.283	0.235	-6.98	0.322	1.72	0.239	-6.58
235	0.285	0.236	-7.08	0.311	0.42	0.241	-6.58
240	0.286	0.239	-6.88	0.313	0.52	0.241	-6.68
245	0.288	0.245	-6.48	0.315	0.52	0.246	-6.38
250	0.289	0.246	-6.48	0.316	0.52	0.248	-6.28
255	0.292	0.244	-6.98	0.315	0.12	0.247	-6.68
260	0.293	0.247	-6.78	0.316	0.12	0.25	-6.48
265	0.293	0.25	-6.48	0.318	0.32	0.252	-6.28
270	0.295	0.251	-6.58	0.32	0.32	0.254	-6.28
275	0.298	0.251	-6.88	0.321	0.12	0.256	-6.38
280	0.297	0.254	-6.48	0.323	0.42	0.257	-6.18
285	0.297	0.257	-6.18	0.324	0.52	0.257	-6.18
290	0.297	0.258	-6.08	0.324	0.52	0.261	-5.78
295	0.3	0.26	-6.18	0.327	0.52	0.259	-6.28
300	0.299	0.262	-5.88	0.326	0.52	0.264	-5.68
305	0.302	0.264	-5.98	0.324	0.02	0.264	-5.98
310	0.303	0.267	-5.78	0.329	0.42	0.266	-5.88
315	0.304	0.27	-5.58	0.327	0.12	0.266	-5.98
320	0.303	0.267	-5.78	0.329	0.42	0.267	-5.78
325	0.305	0.27	-5.68	0.331	0.42	0.267	-5.98
330	0.306	0.272	-5.58	0.33	0.22	0.27	-5.78
335	0.308	0.273	-5.68	0.333	0.32	0.27	-5.98
340	0.308	0.275	-5.48	0.332	0.22	0.274	-5.58
345	0.307	0.278	-5.08	0.333	0.42	-0.893	-122.18
350	0.309	0.279	-5.18	-0.873	-120.38	-0.892	-122.28
355	0.311	0.279	-5.38	-0.874	-120.68	0.231	-10.18
360	0.314	0.282	-5.38	0.305	-3.08	0.236	-9.98
365	0.311	0.283	-4.98	0.305	-2.78	0.239	-9.38
370	0.314	0.285	-5.08	0.306	-2.98	0.246	-8.98
375	0.314	0.286	-4.98	0.306	-2.98	0.249	-8.68
380	0.315	0.286	-5.08	0.306	-3.08	0.253	-8.38
385	0.316	0.291	-4.68	0.308	-2.98	0.254	-8.38
390	0.318	0.292	-4.78	0.308	-3.18	0.257	-8.28
395	0.315	0.293	-4.38	0.308	-2.88	0.259	-7.78
400	0.318	-0.961	-130.08	0.308	-3.18	0.262	-7.78
405	0.316	-0.96	-129.78	0.307	-3.08	0.263	-7.48
410	0.319	0.261	-7.98	0.308	-3.28	0.265	-7.58
415	0.319	0.262	-7.88	0.311	-2.98	0.264	-7.68
420	0.317	0.262	-7.68	0.313	-2.58	0.269	-6.98
425	0.32	0.263	-7.88	0.311	-3.08	0.269	-7.28
430	0.321	0.264	-7.88	0.31	-3.28	0.269	-7.38
435	0.32	0.264	-7.78	0.31	-3.18	0.272	-6.98
440	0.319	0.265	-7.58	0.314	-2.68	0.273	-6.78
445	0.318	0.268	-7.18	0.312	-2.78	0.273	-6.68
450	0.32	0.269	-7.28	0.312	-2.98	0.273	-6.88
455	0.322	0.271	-7.28	0.31	-3.38	0.274	-6.98
460	0.321	0.269	-7.38	0.31	-3.28	0.274	-6.88
465	0.322	0.273	-7.08	0.311	-3.28	0.277	-6.68
470	0.323	0.271	-7.38	0.31	-3.48	0.275	-6.98
475	0.323	0.274	-7.08	0.312	-3.28	0.277	-6.78
480	0.322	0.272	-7.18	0.311	-3.28	0.279	-6.48
485	0.323	0.275	-6.98	0.311	-3.38	0.276	-6.88
490	0.32	0.277	-6.48	0.312	-2.98	0.276	-6.58
495	0.321	0.277	-6.58	0.31	-3.28	0.279	-6.38
500	0.322	0.279	-6.48	0.309	-3.48	0.28	-6.38
505	0.323	0.282	-6.28	0.308	-3.68	0.281	-6.38
510	0.322	0.283	-6.08	0.311	-3.28	0.281	-6.28
515	0.325	0.283	-6.38	0.308	-3.88	0.28	-6.68
520	0.323	0.283	-6.18	0.309	-3.58	0.282	-6.28
525	0.325	0.285	-6.18	0.307	-3.98	0.284	-6.28
530	0.324	0.288	-5.78	0.31	-3.58	0.28	-6.58
535	0.325	0.29	-5.68	0.308	-3.88	0.281	-6.58
540	0.324	0.286	-5.98	0.307	-3.88	0.28	-6.58
545	0.321	0.289	-5.38	0.307	-3.58	0.282	-6.08
550	0.324	0.288	-5.78	0.307	-3.88	0.28	-6.58
555	0.321	0.29	-5.28	0.306	-3.68	0.28	-6.28
560	0.323	0.29	-5.48	0.306	-3.88	0.284	-6.08
565	0.326	0.29	-5.78	0.305	-4.28	0.282	-6.58
570	0.323	0.29	-5.48	0.304	-4.08	0.279	-6.58
575	0.321	0.29	-5.28	0.305	-3.78	0.282	-6.08
580	0.324	0.289	-5.68	0.304	-4.18	0.284	-6.18
585	0.322	0.293	-5.08	0.304	-3.98	0.278	-6.58
590	0.32	0.291	-5.08	0.307	-3.48	0.284	-5.78
595	0.321	0.291	-5.18	0.305	-3.78	0.281	-6.18
600	0.321	0.291	-5.18	0.304	-3.88	0.283	-5.98
605	0.322	0.293	-5.08	0.306	-3.78	0.282	-6.18
610	0.322	0.29	-5.38	0.305	-3.88	0.281	-6.28
615	0.319	0.291	-4.98	0.304	-3.68	0.283	-5.78
620	0.316	0.291	-4.68	0.303	-3.48	0.282	-5.58
625	0.321	0.293	-4.98	0.301	-4.18	0.281	-6.18
630	0.321	0.291	-5.18	0.304	-3.88	0.281	-6.18
635	0.317	0.291	-4.78	0.303	-3.58	0.282	-5.68
640	0.318	0.291	-4.88	0.305	-3.48	0.28	-5.98
645	0.316	0.29	-4.78	0.305	-3.28	0.28	-5.78
650	0.318	0.289	-5.08	0.305	-3.48	0.28	-5.98
655	0.313	0.291	-4.38	0.306	-2.88	0.281	-5.38
660	0.317	0.289	-4.98	0.305	-3.38	0.278	-6.08
665	0.318	0.29	-4.98	0.305	-3.48	0.278	-6.18
670	0.316	0.286	-5.18	0.305	-3.28	0.281	-5.68
675	0.314	0.288	-4.78	0.305	-3.08	0.28	-5.58
680	0.316	0.289	-4.88	0.307	-3.08	0.279	-5.88
685	0.313	0.289	-4.58	0.307	-2.78	0.281	-5.38
690	0.314	0.291	-4.48	0.304	-3.18	0.279	-5.68
695	0.312	0.288	-4.58	0.303	-3.08	0.28	-5.38
700	0.313	0.289	-4.58	0.305	-2.98	0.282	-5.28
705	0.311	0.285	-4.78	0.301	-3.18	0.282	-5.08
710	0.311	0.286	-4.68	0.304	-2.88	0.278	-5.48
715	0.313	0.286	-4.88	0.303	-3.18	0.277	-5.78
720	0.313	0.286	-4.88	0.303	-3.18	0.281	-5.38
725	0.311	0.288	-4.48	0.302	-3.08	0.279	-5.38
730	0.308	0.286	-4.38	0.3	-2.98	0.279	-5.08
735	0.308	0.287	-4.28	0.302	-2.78	0.278	-5.18
740	0.308	0.286	-4.38	0.301	-2.88	0.277	-5.28
745	0.309	0.284	-4.68	0.3	-3.08	0.278	-5.28
750	0.308	0.285	-4.48	0.303	-2.68	0.279	-5.08
755	0.308	0.287	-4.28	0.302	-2.78	0.279	-5.08
760	0.308	0.286	-4.38	0.304	-2.58	0.28	-4.98
765	0.306	0.285	-4.28	0.303	-2.48	0.28	-4.78
770	0.307	0.286	-4.28	0.303	-2.58	0.279	-4.98
775	0.308	0.287	-4.28	0.302	-2.78	0.278	-5.18
780	0.306	0.286	-4.18	0.304	-2.38	0.28	-4.78
785	0.304	0.285	-4.08	0.304	-2.18	0.277	-4.88
790	0.304	0.285	-4.08	0.305	-2.08	0.279	-4.68
795	0.305	0.286	-4.08	0.306	-2.08	0.28	-4.68
800	0.302	0.286	-3.78	0.304	-1.98	0.282	-4.18
805	0.306	0.287	-4.08	0.305	-2.28	0.282	-4.58
810	0.302	0.288	-3.58	0.301	-2.28	0.282	-4.18
815	0.303	0.287	-3.78	0.305	-1.98	0.28	-4.48
820	0.303	0.288	-3.68	0.305	-1.98	0.278	-4.68
825	0.303	0.285	-3.98	0.306	-1.88	0.277	-4.78
830	0.304	0.289	-3.68	0.308	-1.78	0.282	-4.38
835	0.305	0.289	-3.78	0.306	-2.08	0.28	-4.68
840	0.302	0.288	-3.58	0.304	-1.98	0.279	-4.48
845	0.305	0.288	-3.88	0.305	-2.18	0.279	-4.78
850	0.303	0.288	-3.68	0.306	-1.88	0.282	-4.28
855	0.304	0.29	-3.58	0.306	-1.98	0.283	-4.28
860	0.302	0.29	-3.38	0.305	-1.88	0.282	-4.18
865	0.305	0.29	-3.68	0.307	-1.98	0.281	-4.58
870	0.306	0.288	-3.98	0.305	-2.28	0.28	-4.78
875	0.302	0.289	-3.48	0.308	-1.58	0.283	-4.08
880	0.3	0.286	-3.58	0.307	-1.48	0.282	-3.98
885	0.302	0.288	-3.58	0.307	-1.68	0.284	-3.98
890	0.302	0.289	-3.48	0.306	-1.78	0.284	-3.98
895	0.302	0.287	-3.68	0.308	-1.58	0.285	-3.88
900	0.304	0.288	-3.78	0.307	-1.88	0.286	-3.98
905	0.302	0.29	-3.38	0.306	-1.78	0.284	-3.98
910	0.302	0.291	-3.28	0.307	-1.68	0.283	-4.08
915	0.301	0.292	-3.08	0.309	-1.38	0.286	-3.68
920	0.3	0.292	-2.98	0.31	-1.18	0.285	-3.68
925	0.303	0.291	-3.38	0.311	-1.38	0.287	-3.78
930	0.303	0.293	-3.18	0.31	-1.48	0.283	-4.18
935	0.302	0.293	-3.08	0.311	-1.28	0.285	-3.88
940	0.298	0.291	-2.88	0.31	-0.98	0.286	-3.38
945	0.3	0.291	-3.08	0.312	-0.98	0.286	-3.58
950	0.299	0.29	-3.08	0.311	-0.98	0.285	-3.58
955	0.297	0.292	-2.68	0.311	-0.78	0.287	-3.18
960	0.298	0.293	-2.68	0.309	-1.08	0.285	-3.48
965	0.3	0.293	-2.88	0.312	-0.98	0.284	-3.78
970	0.3	0.293	-2.88	0.31	-1.18	0.287	-3.48
975	0.3	0.29	-3.18	0.31	-1.18	0.283	-3.88
980	0.297	0.292	-2.68	0.31	-0.88	0.286	-3.28
985	0.298	0.292	-2.78	0.31	-0.98	0.286	-3.38
990	0.3	0.292	-2.98	0.312	-0.98	0.288	-3.38
995	0.297	0.289	-2.98	0.312	-0.68	0.287	-3.18
1000	0.298	0.293	-2.68	0.312	-0.78	0.287	-3.28
1005	0.3	0.291	-3.08	0.313	-0.88	0.288	-3.38
1010	0.299	0.292	-2.88	0.311	-0.98	0.287	-3.38
1015	0.299	0.289	-3.18	0.31	-1.08	0.289	-3.18
1020	0.298	0.288	-3.18	0.312	-0.78	0.289	-3.08
1025	0.299	0.288	-3.28	0.313	-0.78	0.287	-3.38
1030	0.295	0.291	-2.58	0.316	-0.08	0.291	-2.58
1035	0.296	0.288	-2.98	0.315	-0.28	0.288	-2.98
1040	0.298	0.288	-3.18	0.316	-0.38	0.288	-3.18
1045	0.301	0.29	-3.28	0.315	-0.78	0.287	-3.58
1050	0.297	0.289	-2.98	0.318	-0.08	0.288	-3.08
1055	0.3	0.289	-3.28	0.316	-0.58	0.289	-3.28
1060	0.296	0.288	-2.98	0.316	-0.18	0.288	-2.98
1065	0.297	0.289	-2.98	0.316	-0.28	0.29	-2.88
1070	0.297	0.289	-2.98	0.319	0.02	0.289	-2.98
1075	0.298	0.29	-2.98	0.317	-0.28	0.287	-3.28
1080	0.297	0.29	-2.88	0.321	0.22	0.289	-2.98
1085	0.3	0.29	-3.18	0.32	-0.18	0.29	-3.18
1090	0.298	0.289	-3.08	0.322	0.22	0.289	-3.08
1095	0.3	0.288	-3.38	0.32	-0.18	0.291	-3.08
1100	0.3	0.288	-3.38	0.322	0.02	0.289	-3.28
1105	0.296	0.289	-2.88	0.324	0.62	0.288	-2.98
1110	0.295	0.289	-2.78	0.321	0.42	0.29	-2.68
1115	0.298	0.287	-3.28	0.324	0.42	0.288	-3.18
1120	0.297	0.284	-3.48	0.322	0.32	0.291	-2.78
1125	0.295	0.288	-2.88	0.325	0.82	0.288	-2.88
1130	0.296	0.287	-3.08	0.324	0.62	0.287	-3.08
1135	0.295	0.289	-2.78	0.322	0.52	0.288	-2.88
1140	0.298	0.289	-3.08	0.323	0.32	0.291	-2.88
1145	0.296	0.29	-2.78	0.324	0.62	0.288	-2.98
1150	0.297	0.286	-3.28	0.325	0.62	0.29	-2.88
1155	0.296	0.286	-3.18	0.324	0.62	0.287	-3.08
1160	0.296	0.292	-2.58	0.326	0.82	0.287	-3.08
1165	0.297	0.289	-2.98	0.327	0.82	0.288	-3.08
1170	0.299	0.29	-3.08	0.327	0.62	0.289	-3.18
1175	0.297	0.292	-2.68	0.327	0.82	0.291	-2.78
1180	0.3	0.294	-2.78	0.325	0.32	0.29	-3.18
1185	0.296	0.289	-2.88	0.325	0.72	0.29	-2.78
1190	0.298	0.292	-2.78	0.327	0.72	0.289	-3.08
1195	0.293	0.29	-2.48	0.326	1.12	0.289	-2.58
1200	0.298	0.292	-2.78	0.326	0.62	0.29	-2.98
1205	0.296	0.294	-2.38	0.327	0.92	0.292	-2.58
1210	0.295	0.292	-2.48	0.325	0.82	0.29	-2.68
1215	0.298	0.293	-2.68	0.329	0.92	0.29	-2.98
1220	0.298	0.291	-2.88	0.329	0.92	0.291	-2.88
1225	0.295	0.294	-2.28	0.33	1.32	0.293	-2.38
1230	0.296	0.293	-2.48	0.328	1.02	0.29	-2.78
1235	0.295	0.295	-2.18	0.33	1.32	0.289	-2.78
1240	0.295	0.295	-2.18	0.328	1.12	0.289	-2.78
1245	0.297	0.297	-2.18	0.33	1.12	0.288	-3.08
1250	0.299	0.298	-2.28	0.331	1.02	0.291	-2.98
1255	0.297	0.297	-2.18	0.331	1.22	0.292	-2.68
1260	0.296	0.299	-1.88	0.331	1.32	0.29	-2.78
1265	0.293	0.299	-1.58	0.33	1.52	0.288	-2.68
1270	0.297	0.3	-1.88	0.33	1.12	0.289	-2.98
1275	0.296	0.298	-1.98	0.334	1.62	0.291	-2.68
1280	0.296	0.297	-2.08	0.331	1.32	0.291	-2.68
1285	0.299	0.297	-2.38	0.33	0.92	0.29	-3.08
1290	0.298	0.301	-1.88	0.331	1.12	0.289	-3.08
1295	0.298	0.299	-2.08	0.332	1.22	0.289	-3.08
1300	0.298	0.3	-1.98	0.329	0.92	0.291	-2.88
1305	0.297	0.297	-2.18	0.331	1.22	0.292	-2.68
1310	0.297	0.299	-1.98	0.33	1.12	0.291	-2.78
1315	0.297	0.301	-1.78	0.331	1.22	0.291	-2.78
1320	0.297	0.299	-1.98	0.332	1.32	0.293	-2.58
1325	0.298	0.299	-2.08	0.332	1.22	0.294	-2.58
1330	0.298	0.301	-1.88	0.331	1.12	0.292	-2.78
1335	0.297	0.301	-1.78	0.329	1.02	0.291	-2.78
1340	0.298	0.3	-1.98	0.332	1.22	0.291	-2.88
1345	0.297	0.299	-1.98	0.331	1.22	0.292	-2.68
1350	0.297	0.301	-1.78	0.33	1.12	0.291	-2.78
1355	0.299	0.301	-1.98	0.331	1.02	0.294	-2.68
1360	0.3	0.299	-2.28	0.333	1.12	0.292	-2.98
1365	0.299	0.3	-2.08	0.333	1.22	0.293	-2.78
1370	0.299	0.299	-2.18	0.334	1.32	0.294	-2.68
1375	0.296	0.299	-1.88	0.334	1.62	0.292	-2.58
1380	0.298	0.301	-1.88	0.334	1.42	0.294	-2.58
1385	0.296	0.299	-1.88	0.332	1.42	0.294	-2.38
1390	0.297	0.301	-1.78	0.333	1.42	0.296	-2.28
1395	0.299	0.299	-2.18	0.333	1.22	0.297	-2.38
1400	0.297	0.3	-1.88	0.332	1.32	0.295	-2.38
1405	0.297	0.301	-1.78	0.332	1.32	0.295	-2.38
1410	0.298	0.298	-2.18	0.334	1.42	0.294	-2.58
1415	0.296	0.296	-2.18	0.336	1.82	0.295	-2.28
1420	0.298	0.299	-2.08	0.335	1.52	0.296	-2.38
1425	0.297	0.3	-1.88	0.333	1.42	0.295	-2.38
1430	0.295	0.303	-1.38	0.335	1.82	0.297	-1.98
1435	0.297	0.299	-1.98	0.335	1.62	0.294	-2.48
1440	0.296	0.302	-1.58	0.338	2.02	0.292	-2.58
1445	0.295	0.3	-1.68	0.338	2.12	0.296	-2.08
1450	0.296	0.303	-1.48	0.338	2.02	0.295	-2.28
1455	0.297	0.301	-1.78	0.335	1.62	0.294	-2.48
1460	0.297	0.303	-1.58	0.336	1.72	0.294	-2.48
1465	0.297	0.302	-1.68	0.334	1.52	0.292	-2.68
1470	0.297	0.301	-1.78	0.338	1.92	0.297	-2.18
1475	0.297	0.303	-1.58	0.338	1.92	0.294	-2.48
1480	0.297	0.302	-1.68	0.338	1.92	0.294	-2.48
1485	0.297	0.302	-1.68	0.34	2.12	0.295	-2.38
1490	0.299	0.302	-1.88	0.339	1.82	0.293	-2.78
1495	0.296	0.3	-1.78	0.338	2.02	0.294	-2.38
1500	0.295	0.303	-1.38	0.339	2.22	0.294	-2.28
1505	0.297	0.304	-1.48	0.334	1.52	0.295	-2.38
1510	0.297	0.303	-1.58	0.339	2.02	0.296	-2.28
1515	0.296	0.302	-1.58	0.339	2.12	0.294	-2.38
1520	0.298	0.3	-1.98	0.341	2.12	0.296	-2.38
1525	0.3	0.302	-1.98	0.339	1.72	0.293	-2.88
1530	0.301	0.304	-1.88	0.34	1.72	0.294	-2.88
1535	0.298	0.3	-1.98	0.338	1.82	0.294	-2.58
1540	0.301	0.302	-2.08	0.343	2.02	0.295	-2.78
1545	0.298	0.303	-1.68	0.343	2.32	0.296	-2.38
1550	0.297	0.3	-1.88	0.342	2.32	0.294	-2.48
1555	0.299	0.299	-2.18	0.344	2.32	0.294	-2.68
1560	0.298	0.299	-2.08	0.343	2.32	0.296	-2.38
1565	0.295	0.301	-1.58	0.344	2.72	0.296	-2.08
1570	0.299	0.3	-2.08	0.346	2.52	0.292	-2.88
1575	0.297	0.3	-1.88	0.344	2.52	0.296	-2.28
1580	0.299	0.3	-2.08	0.345	2.42	0.296	-2.48
1585	0.296	0.296	-2.18	0.346	2.82	0.295	-2.28
1590	0.298	0.296	-2.38	0.345	2.52	0.3	-1.98
1595	0.295	0.299	-1.78	0.345	2.82	0.296	-2.08
1600	0.296	0.297	-2.08	0.346	2.82	0.294	-2.38
1605	0.298	0.301	-1.88	0.346	2.62	0.294	-2.58
1610	0.298	0.3	-1.98	0.346	2.62	0.296	-2.38
1615	0.295	0.301	-1.58	0.349	3.22	0.297	-1.98
1620	0.296	0.3	-1.78	0.347	2.92	0.297	-2.08
1625	0.293	0.301	-1.38	0.348	3.32	0.296	-1.88
1630	0.297	0.302	-1.68	0.345	2.62	0.296	-2.28
1635	0.296	0.301	-1.68	0.347	2.92	0.296	-2.18
1640	0.294	0.303	-1.28	0.349	3.32	0.295	-2.08
1645	0.296	0.304	-1.38	0.346	2.82	0.299	-1.88
1650	0.296	0.301	-1.68	0.35	3.22	0.296	-2.18
1655	0.294	0.301	-1.48	0.349	3.32	0.3	-1.58
1660	0.295	0.305	-1.18	0.349	3.22	0.298	-1.88
1665	0.295	0.3	-1.68	0.349	3.22	0.3	-1.68
1670	0.295	0.301	-1.58	0.349	3.22	0.3	-1.68
1675	0.296	0.304	-1.38	0.347	2.92	0.296	-2.18
1680	0.3	0.304	-1.78	0.348	2.62	0.3	-2.18
1685	0.297	0.307	-1.18	0.349	3.02	0.3	-1.88
1690	0.297	0.304	-1.48	0.35	3.12	0.302	-1.68
1695	0.298	0.306	-1.38	0.348	2.82	0.3	-1.98
1700	0.297	0.304	-1.48	0.348	2.92	0.302	-1.68
1705	0.294	0.305	-1.08	0.347	3.12	0.301	-1.48
1710	0.297	0.307	-1.18	0.348	2.92	0.301	-1.78
1715	0.296	0.305	-1.28	0.348	3.02	0.303	-1.48
1720	0.295	0.309	-0.78	0.349	3.22	0.303	-1.38
1725	0.296	0.304	-1.38	0.348	3.02	0.3	-1.78
1730	0.296	0.305	-1.28	0.349	3.12	0.301	-1.68
1735	0.295	0.303	-1.38	0.348	3.12	0.303	-1.38
1740	0.295	0.306	-1.08	0.351	3.42	0.302	-1.48
1745	0.297	0.306	-1.28	0.353	3.42	0.301	-1.78
1750	0.295	0.306	-1.08	0.349	3.22	0.301	-1.58
1755	0.297	0.307	-1.18	0.35	3.12	0.3	-1.88
1760	0.295	0.305	-1.18	0.349	3.22	0.301	-1.58
1765	0.298	0.305	-1.48	0.348	2.82	0.302	-1.78
1770	0.295	0.306	-1.08	0.35	3.32	0.304	-1.28
1775	0.297	0.306	-1.28	0.35	3.12	0.299	-1.98
1780	0.295	0.307	-0.98	0.35	3.32	0.302	-1.48
1785	0.298	0.306	-1.38	0.35	3.02	0.303	-1.68
1790	0.295	0.305	-1.18	0.349	3.22	0.303	-1.38
1795	0.298	0.309	-1.08	0.352	3.22	0.302	-1.78
1800	0.294	0.304	-1.18	0.35	3.42	0.301	-1.48

## Sheet: 300MT_Mo
Time (sec)	BG_OD360	1st_OD360	1st_ΔPi con. (μM)	2nd_MK_OD360	2nd_ΔPi con. (μM)	3rd_OD360	3rd_ΔPi con. (μM)
	0.016	-0.016		-0.002		-0.019
5	0.029	-0.002	-5.28	0.011	-3.98	0.003	-4.78
10	0.038	0.009	-5.08	0.025	-3.48	0.017	-4.28
15	0.051	0.024	-4.88	0.035	-3.78	0.03	-4.28
20	0.06	0.035	-4.68	0.046	-3.58	0.044	-3.78
25	0.071	0.047	-4.58	0.056	-3.68	0.056	-3.68
30	0.082	0.059	-4.48	0.068	-3.58	0.067	-3.68
35	0.093	0.069	-4.58	0.077	-3.78	0.079	-3.58
40	0.104	0.081	-4.48	0.087	-3.88	0.089	-3.68
45	0.115	0.094	-4.28	0.099	-3.78	0.1	-3.68
50	0.125	0.102	-4.48	0.107	-3.98	0.11	-3.68
55	0.137	0.112	-4.68	0.117	-4.18	0.118	-4.08
60	0.147	0.123	-4.58	0.125	-4.38	0.13	-3.88
65	0.156	0.128	-4.98	0.134	-4.38	0.138	-3.98
70	0.165	0.136	-5.08	0.142	-4.48	0.145	-4.18
75	0.173	0.145	-4.98	0.15	-4.48	0.152	-4.28
80	0.179	0.152	-4.88	0.159	-4.18	0.161	-3.98
85	0.184	0.161	-4.48	0.163	-4.28	0.163	-4.28
90	0.192	0.169	-4.48	0.172	-4.18	0.172	-4.18
95	0.198	0.176	-4.38	0.177	-4.28	0.177	-4.28
100	0.202	0.184	-3.98	0.183	-4.08	0.185	-3.88
105	0.208	0.187	-4.28	0.187	-4.28	0.187	-4.28
110	0.208	0.197	-3.28	0.191	-3.88	0.192	-3.78
115	0.215	0.203	-3.38	0.198	-3.88	0.199	-3.78
120	0.216	0.207	-3.08	0.2	-3.78	0.202	-3.58
125	0.224	0.214	-3.18	0.206	-3.98	0.207	-3.88
130	0.227	0.22	-2.88	0.212	-3.68	0.21	-3.88
135	0.231	0.222	-3.08	0.217	-3.58	0.214	-3.88
140	0.236	0.228	-2.98	0.219	-3.88	0.217	-4.08
145	0.239	0.23	-3.08	0.223	-3.78	0.222	-3.88
150	0.243	0.235	-2.98	0.227	-3.78	0.226	-3.88
155	0.247	0.238	-3.08	0.233	-3.58	0.226	-4.28
160	0.251	0.242	-3.08	0.236	-3.68	0.229	-4.38
165	0.254	0.246	-2.98	0.239	-3.68	0.234	-4.18
170	0.257	0.247	-3.18	0.241	-3.78	0.235	-4.38
175	0.26	0.251	-3.08	0.245	-3.68	0.236	-4.58
180	0.263	0.253	-3.18	0.249	-3.58	0.236	-4.88
185	0.265	0.258	-2.88	0.251	-3.58	0.239	-4.78
190	0.271	0.263	-2.98	0.256	-3.68	0.241	-5.18
195	0.272	0.264	-2.98	0.257	-3.68	0.242	-5.18
200	0.276	0.265	-3.28	0.259	-3.88	0.245	-5.28
205	0.277	0.269	-2.98	0.264	-3.48	0.246	-5.28
210	0.278	0.272	-2.78	0.267	-3.28	0.247	-5.28
215	0.284	0.273	-3.28	0.268	-3.78	0.247	-5.88
220	0.285	0.277	-2.98	0.27	-3.68	0.252	-5.48
225	0.285	0.279	-2.78	0.274	-3.28	0.252	-5.48
230	0.292	0.28	-3.38	0.275	-3.88	0.251	-6.28
235	0.292	0.282	-3.18	0.279	-3.48	0.253	-6.08
240	0.293	0.287	-2.78	0.282	-3.28	0.253	-6.18
245	0.297	0.285	-3.38	0.284	-3.48	0.254	-6.48
250	0.296	0.286	-3.18	0.284	-3.38	0.253	-6.48
255	0.299	0.29	-3.08	0.285	-3.58	0.255	-6.58
260	0.304	0.289	-3.68	0.288	-3.78	0.255	-7.08
265	0.301	0.293	-2.98	0.287	-3.58	0.256	-6.68
270	0.305	0.294	-3.28	0.29	-3.68	0.257	-6.98
275	0.307	0.296	-3.28	0.29	-3.88	0.254	-7.48
280	0.306	0.296	-3.18	0.295	-3.28	0.257	-7.08
285	0.309	0.296	-3.48	0.296	-3.48	0.259	-7.18
290	0.31	0.298	-3.38	0.297	-3.48	0.258	-7.38
295	0.311	0.298	-3.48	0.301	-3.18	0.257	-7.58
300	0.313	0.301	-3.38	0.301	-3.38	0.26	-7.48
305	0.314	0.3	-3.58	0.303	-3.28	0.261	-7.48
310	0.316	0.306	-3.18	0.305	-3.28	0.257	-8.08
315	0.319	0.306	-3.48	0.306	-3.48	0.259	-8.18
320	0.317	0.304	-3.48	0.307	-3.18	0.26	-7.88
325	0.319	0.306	-3.48	0.311	-2.98	0.258	-8.28
330	0.321	0.308	-3.48	0.31	-3.28	0.257	-8.58
335	0.321	0.307	-3.58	0.311	-3.18	0.259	-8.38
340	0.323	0.313	-3.18	0.31	-3.48	0.257	-8.78
345	0.323	-0.914	-125.88	0.312	-3.28	-0.966	-131.08
350	0.325	-0.914	-126.08	0.313	-3.38	-0.969	-131.58
355	0.324	0.271	-7.48	0.311	-3.48	0.242	-10.38
360	0.325	0.279	-6.78	0.315	-3.18	0.248	-9.88
365	0.325	0.283	-6.38	-0.901	-124.78	0.256	-9.08
370	0.327	0.286	-6.28	-0.9	-124.88	0.252	-9.68
375	0.325	0.288	-5.88	0.276	-7.08	0.257	-8.98
380	0.329	0.293	-5.78	0.28	-7.08	0.257	-9.38
385	0.328	0.296	-5.38	0.281	-6.88	0.258	-9.18
390	0.329	0.298	-5.28	0.283	-6.78	0.262	-8.88
395	0.329	0.3	-5.08	0.285	-6.58	0.262	-8.88
400	0.328	0.3	-4.98	0.287	-6.28	0.261	-8.88
405	0.331	0.3	-5.28	0.289	-6.38	0.264	-8.88
410	0.329	0.3	-5.08	0.292	-5.88	0.266	-8.48
415	0.331	0.303	-4.98	0.295	-5.78	0.261	-9.18
420	0.333	0.305	-4.98	0.296	-5.88	0.264	-9.08
425	0.331	0.306	-4.68	0.296	-5.68	0.263	-8.98
430	0.332	0.305	-4.88	0.297	-5.68	0.265	-8.88
435	0.332	0.305	-4.88	0.299	-5.48	0.266	-8.78
440	0.332	0.303	-5.08	0.3	-5.38	0.269	-8.48
445	0.332	0.304	-4.98	0.301	-5.28	0.268	-8.58
450	0.331	0.308	-4.48	0.304	-4.88	0.27	-8.28
455	0.33	0.307	-4.48	0.303	-4.88	0.268	-8.38
460	0.33	0.306	-4.58	0.305	-4.68	0.266	-8.58
465	0.331	0.305	-4.78	0.306	-4.68	0.267	-8.58
470	0.332	0.309	-4.48	0.309	-4.48	0.268	-8.58
475	0.329	0.307	-4.38	0.311	-3.98	0.266	-8.48
480	0.33	0.306	-4.58	0.307	-4.48	0.269	-8.28
485	0.333	0.307	-4.78	0.307	-4.78	0.269	-8.58
490	0.332	0.306	-4.78	0.311	-4.28	0.272	-8.18
495	0.33	0.306	-4.58	0.31	-4.18	0.271	-8.08
500	0.329	0.307	-4.38	0.311	-3.98	0.27	-8.08
505	0.331	0.305	-4.78	0.311	-4.18	0.271	-8.18
510	0.33	0.305	-4.68	0.312	-3.98	0.27	-8.18
515	0.329	0.304	-4.68	0.312	-3.88	0.274	-7.68
520	0.331	0.308	-4.48	0.312	-4.08	0.275	-7.78
525	0.329	0.303	-4.78	0.31	-4.08	0.273	-7.78
530	0.328	0.303	-4.68	0.312	-3.78	0.274	-7.58
535	0.328	0.304	-4.58	0.314	-3.58	0.274	-7.58
540	0.328	0.303	-4.68	0.312	-3.78	0.276	-7.38
545	0.327	0.304	-4.48	0.311	-3.78	0.276	-7.28
550	0.326	0.305	-4.28	0.317	-3.08	0.272	-7.58
555	0.326	0.304	-4.38	0.316	-3.18	0.275	-7.28
560	0.325	0.306	-4.08	0.318	-2.88	0.278	-6.88
565	0.325	0.304	-4.28	0.316	-3.08	0.276	-7.08
570	0.326	0.306	-4.18	0.315	-3.28	0.279	-6.88
575	0.322	0.306	-3.78	0.316	-2.78	0.276	-6.78
580	0.322	0.306	-3.78	0.317	-2.68	0.275	-6.88
585	0.321	0.306	-3.68	0.315	-2.78	0.275	-6.78
590	0.322	0.305	-3.88	0.315	-2.88	0.279	-6.48
595	0.321	0.305	-3.78	0.316	-2.68	0.275	-6.78
600	0.317	0.307	-3.18	0.319	-1.98	0.277	-6.18
605	0.314	0.308	-2.78	0.317	-1.88	0.277	-5.88
610	0.317	0.306	-3.28	0.319	-1.98	0.28	-5.88
615	0.317	0.306	-3.28	0.321	-1.78	0.281	-5.78
620	0.313	0.308	-2.68	0.317	-1.78	0.278	-5.68
625	0.313	0.307	-2.78	0.317	-1.78	0.281	-5.38
630	0.312	0.309	-2.48	0.32	-1.38	0.28	-5.38
635	0.31	0.307	-2.48	0.318	-1.38	0.282	-4.98
640	0.307	0.305	-2.38	0.319	-0.98	0.282	-4.68
645	0.311	0.307	-2.58	0.32	-1.28	0.281	-5.18
650	0.309	0.307	-2.38	0.324	-0.68	0.283	-4.78
655	0.308	0.305	-2.48	0.323	-0.68	0.282	-4.78
660	0.306	0.308	-1.98	0.322	-0.58	0.284	-4.38
665	0.306	0.306	-2.18	0.324	-0.38	0.284	-4.38
670	0.303	0.309	-1.58	0.323	-0.18	0.282	-4.28
675	0.305	0.308	-1.88	0.324	-0.28	0.286	-4.08
680	0.304	0.307	-1.88	0.321	-0.48	0.285	-4.08
685	0.303	0.304	-2.08	0.324	-0.08	0.284	-4.08
690	0.303	0.306	-1.88	0.324	-0.08	0.281	-4.38
695	0.3	0.306	-1.58	0.323	0.12	0.282	-3.98
700	0.301	0.307	-1.58	0.323	0.02	0.281	-4.18
705	0.301	0.307	-1.58	0.326	0.32	0.283	-3.98
710	0.298	0.307	-1.28	0.325	0.52	0.284	-3.58
715	0.298	0.303	-1.68	0.326	0.62	0.284	-3.58
720	0.297	0.304	-1.48	0.325	0.62	0.284	-3.48
725	0.297	0.306	-1.28	0.323	0.42	0.283	-3.58
730	0.294	0.307	-0.88	0.323	0.72	0.284	-3.18
735	0.294	0.304	-1.18	0.326	1.02	0.281	-3.48
740	0.293	0.307	-0.78	0.328	1.32	0.285	-2.98
745	0.293	0.307	-0.78	0.327	1.22	0.285	-2.98
750	0.29	0.305	-0.68	0.329	1.72	0.285	-2.68
755	0.292	0.307	-0.68	0.327	1.32	0.285	-2.88
760	0.292	0.304	-0.98	0.33	1.62	0.285	-2.88
765	0.29	0.308	-0.38	0.329	1.72	0.287	-2.48
770	0.291	0.308	-0.48	0.33	1.72	0.286	-2.68
775	0.292	0.307	-0.68	0.328	1.42	0.286	-2.78
780	0.29	0.308	-0.38	0.33	1.82	0.289	-2.28
785	0.289	0.31	-0.08	0.33	1.92	0.288	-2.28
790	0.289	0.307	-0.38	0.333	2.22	0.286	-2.48
795	0.291	0.308	-0.48	0.335	2.22	0.288	-2.48
800	0.288	0.311	0.12	0.333	2.32	0.289	-2.08
805	0.29	0.307	-0.48	0.337	2.52	0.29	-2.18
810	0.289	0.308	-0.28	0.334	2.32	0.287	-2.38
815	0.287	0.309	0.02	0.335	2.62	0.289	-1.98
820	0.29	0.311	-0.08	0.334	2.22	0.291	-2.08
825	0.291	0.311	-0.18	0.336	2.32	0.29	-2.28
830	0.29	0.311	-0.08	0.336	2.42	0.287	-2.48
835	0.291	0.314	0.12	0.338	2.52	0.287	-2.58
840	0.288	0.315	0.52	0.338	2.82	0.289	-2.08
845	0.288	0.314	0.42	0.338	2.82	0.288	-2.18
850	0.301	0.315	-0.78	0.337	1.42	0.288	-3.48
855	0.288	0.315	0.52	0.338	2.82	0.289	-2.08
860	0.287	0.314	0.52	0.338	2.92	0.287	-2.18
865	0.284	0.312	0.62	0.337	3.12	0.289	-1.68
870	0.288	0.315	0.52	0.337	2.72	0.289	-2.08
875	0.288	0.313	0.32	0.34	3.02	0.29	-1.98
880	0.288	0.314	0.42	0.338	2.82	0.293	-1.68
885	0.288	0.314	0.42	0.339	2.92	0.292	-1.78
890	0.289	0.314	0.32	0.337	2.62	0.292	-1.88
895	0.287	0.314	0.52	0.344	3.52	0.292	-1.68
900	0.285	0.315	0.82	0.34	3.32	0.289	-1.78
905	0.29	0.316	0.42	0.342	3.02	0.288	-2.38
910	0.29	0.321	0.92	0.345	3.32	0.288	-2.38
915	0.289	0.318	0.72	0.342	3.12	0.294	-1.68
920	0.289	0.318	0.72	0.346	3.52	0.287	-2.38
925	0.29	0.319	0.72	0.348	3.62	0.292	-1.98
930	0.288	0.32	1.02	0.345	3.52	0.294	-1.58
935	0.289	0.318	0.72	0.35	3.92	0.292	-1.88
940	0.289	0.319	0.82	0.351	4.02	0.29	-2.08
945	0.288	0.322	1.22	0.351	4.12	0.29	-1.98
950	0.289	0.322	1.12	0.348	3.72	0.289	-2.18
955	0.292	0.323	0.92	0.351	3.72	0.292	-2.18
960	0.289	0.323	1.22	0.351	4.02	0.296	-1.48
965	0.289	0.323	1.22	0.35	3.92	0.294	-1.68
970	0.291	0.326	1.32	0.349	3.62	0.293	-1.98
975	0.291	0.326	1.32	0.352	3.92	0.293	-1.98
980	0.291	0.329	1.62	0.354	4.12	0.294	-1.88
985	0.291	0.328	1.52	0.355	4.22	0.295	-1.78
990	0.29	0.326	1.42	0.356	4.42	0.296	-1.58
995	0.29	0.329	1.72	0.356	4.42	0.293	-1.88
1000	0.289	0.328	1.72	0.36	4.92	0.293	-1.78
1005	0.291	0.327	1.42	0.359	4.62	0.294	-1.88
1010	0.291	0.328	1.52	0.358	4.52	0.294	-1.88
1015	0.29	0.327	1.52	0.359	4.72	0.297	-1.48
1020	0.29	0.326	1.42	0.363	5.12	0.298	-1.38
1025	0.292	0.328	1.42	0.362	4.82	0.297	-1.68
1030	0.291	0.33	1.72	0.357	4.42	0.298	-1.48
1035	0.288	0.329	1.92	0.359	4.92	0.297	-1.28
1040	0.291	0.332	1.92	0.362	4.92	0.299	-1.38
1045	0.291	0.332	1.92	0.361	4.82	0.297	-1.58
1050	0.289	0.33	1.92	0.36	4.92	0.294	-1.68
1055	0.291	0.329	1.62	0.365	5.22	0.298	-1.48
1060	0.292	0.331	1.72	0.364	5.02	0.297	-1.68
1065	0.293	0.332	1.72	0.365	5.02	0.294	-2.08
1070	0.293	0.33	1.52	0.365	5.02	0.296	-1.88
1075	0.292	0.33	1.62	0.365	5.12	0.297	-1.68
1080	0.292	0.332	1.82	0.364	5.02	0.295	-1.88
1085	0.294	0.332	1.62	0.367	5.12	0.293	-2.28
1090	0.293	0.332	1.72	0.368	5.32	0.296	-1.88
1095	0.293	0.334	1.92	0.369	5.42	0.295	-1.98
1100	0.292	0.339	2.52	0.37	5.62	0.293	-2.08
1105	0.294	0.332	1.62	0.37	5.42	0.295	-2.08
1110	0.292	0.335	2.12	0.369	5.52	0.296	-1.78
1115	0.292	0.334	2.02	0.371	5.72	0.295	-1.88
1120	0.294	0.333	1.72	0.372	5.62	0.294	-2.18
1125	0.291	0.335	2.22	0.373	6.02	0.295	-1.78
1130	0.295	0.335	1.82	0.37	5.32	0.291	-2.58
1135	0.291	0.335	2.22	0.374	6.12	0.293	-1.98
1140	0.293	0.336	2.12	0.377	6.22	0.29	-2.48
1145	0.291	0.337	2.42	0.375	6.22	0.29	-2.28
1150	0.293	0.338	2.32	0.375	6.02	0.292	-2.28
1155	0.293	0.333	1.82	0.376	6.12	0.291	-2.38
1160	0.293	0.337	2.22	0.375	6.02	0.291	-2.38
1165	0.291	0.337	2.42	0.378	6.52	0.289	-2.38
1170	0.291	0.339	2.62	0.378	6.52	0.291	-2.18
1175	0.293	0.337	2.22	0.376	6.12	0.291	-2.38
1180	0.294	0.34	2.42	0.376	6.02	0.294	-2.18
1185	0.294	0.341	2.52	0.376	6.02	0.294	-2.18
1190	0.291	0.337	2.42	0.375	6.22	0.294	-1.88
1195	0.294	0.338	2.22	0.373	5.72	0.294	-2.18
1200	0.295	0.339	2.22	0.374	5.72	0.294	-2.28
1205	0.296	0.34	2.22	0.376	5.82	0.295	-2.28
1210	0.294	0.34	2.42	0.374	5.82	0.292	-2.38
1215	0.297	0.34	2.12	0.377	5.82	0.293	-2.58
1220	0.295	0.341	2.42	0.376	5.92	0.296	-2.08
1225	0.296	0.341	2.32	0.377	5.92	0.294	-2.38
1230	0.292	0.341	2.72	0.374	6.02	0.296	-1.78
1235	0.295	0.341	2.42	0.376	5.92	0.298	-1.88
1240	0.295	0.343	2.62	0.38	6.32	0.298	-1.88
1245	0.294	0.343	2.72	0.376	6.02	0.299	-1.68
1250	0.292	0.341	2.72	0.376	6.22	0.301	-1.28
1255	0.294	0.342	2.62	0.376	6.02	0.302	-1.38
1260	0.295	0.34	2.32	0.38	6.32	0.297	-1.98
1265	0.292	0.342	2.82	0.378	6.42	0.299	-1.48
1270	0.295	0.34	2.32	0.381	6.42	0.304	-1.28
1275	0.294	0.339	2.32	0.38	6.42	0.304	-1.18
1280	0.295	0.338	2.12	0.382	6.52	0.301	-1.58
1285	0.294	0.341	2.52	0.376	6.02	0.3	-1.58
1290	0.292	0.341	2.72	0.378	6.42	0.302	-1.18
1295	0.293	0.338	2.32	0.379	6.42	0.303	-1.18
1300	0.293	0.34	2.52	0.382	6.72	0.301	-1.38
1305	0.293	0.342	2.72	0.381	6.62	0.302	-1.28
1310	0.293	0.341	2.62	0.379	6.42	0.303	-1.18
1315	0.292	0.342	2.82	0.381	6.72	0.302	-1.18
1320	0.293	0.344	2.92	0.381	6.62	0.304	-1.08
1325	0.294	0.346	3.02	0.384	6.82	0.304	-1.18
1330	0.293	0.345	3.02	0.384	6.92	0.304	-1.08
1335	0.294	0.342	2.62	0.381	6.52	0.303	-1.28
1340	0.296	0.345	2.72	0.383	6.52	0.304	-1.38
1345	0.293	0.344	2.92	0.383	6.82	0.304	-1.08
1350	0.294	0.344	2.82	0.381	6.52	0.308	-0.78
1355	0.293	0.345	3.02	0.379	6.42	0.305	-0.98
1360	0.295	0.347	3.02	0.383	6.62	0.309	-0.78
1365	0.293	0.344	2.92	0.381	6.62	0.309	-0.58
1370	0.294	0.347	3.12	0.381	6.52	0.309	-0.68
1375	0.294	0.343	2.72	0.384	6.82	0.309	-0.68
1380	0.296	0.344	2.62	0.383	6.52	0.311	-0.68
1385	0.293	0.345	3.02	0.382	6.72	0.307	-0.78
1390	0.296	0.343	2.52	0.383	6.52	0.31	-0.78
1395	0.293	0.348	3.32	0.382	6.72	0.309	-0.58
1400	0.297	0.344	2.52	0.383	6.42	0.31	-0.88
1405	0.295	0.344	2.72	0.385	6.82	0.311	-0.58
1410	0.294	0.35	3.42	0.384	6.82	0.311	-0.48
1415	0.294	0.35	3.42	0.383	6.72	0.312	-0.38
1420	0.296	0.35	3.22	0.387	6.92	0.312	-0.58
1425	0.295	0.349	3.22	0.384	6.72	0.314	-0.28
1430	0.295	0.349	3.22	0.384	6.72	0.31	-0.68
1435	0.295	0.346	2.92	0.383	6.62	0.312	-0.48
1440	0.294	0.349	3.32	0.385	6.92	0.314	-0.18
1445	0.293	0.346	3.12	0.386	7.12	0.313	-0.18
1450	0.295	0.347	3.02	0.384	6.72	0.314	-0.28
1455	0.296	0.347	2.92	0.385	6.72	0.312	-0.58
1460	0.296	0.347	2.92	0.382	6.42	0.315	-0.28
1465	0.295	0.347	3.02	0.385	6.82	0.311	-0.58
1470	0.296	0.348	3.02	0.384	6.62	0.313	-0.48
1475	0.295	0.346	2.92	0.386	6.92	0.309	-0.78
1480	0.295	0.344	2.72	0.386	6.92	0.313	-0.38
1485	0.296	0.344	2.62	0.384	6.62	0.315	-0.28
1490	0.294	0.347	3.12	0.397	8.12	0.314	-0.18
1495	0.295	0.346	2.92	0.384	6.72	0.315	-0.18
1500	0.297	0.346	2.72	0.386	6.72	0.317	-0.18
1505	0.296	0.347	2.92	0.384	6.62	0.314	-0.38
1510	0.295	0.351	3.42	0.386	6.92	0.317	0.02
1515	0.292	0.352	3.82	0.389	7.52	0.317	0.32
1520	0.294	0.349	3.32	0.385	6.92	0.315	-0.08
1525	0.294	0.353	3.72	0.387	7.12	0.314	-0.18
1530	0.293	0.348	3.32	0.388	7.32	0.316	0.12
1535	0.294	0.351	3.52	0.389	7.32	0.319	0.32
1540	0.294	0.356	4.02	0.386	7.02	0.318	0.22
1545	0.296	0.353	3.52	0.385	6.72	0.315	-0.28
1550	0.294	0.355	3.92	0.387	7.12	0.315	-0.08
1555	0.295	0.355	3.82	0.389	7.22	0.315	-0.18
1560	0.293	0.354	3.92	0.385	7.02	0.315	0.02
1565	0.295	0.353	3.62	0.387	7.02	0.314	-0.28
1570	0.295	0.355	3.82	0.386	6.92	0.314	-0.28
1575	0.295	0.354	3.72	0.386	6.92	0.32	0.32
1580	0.293	0.356	4.12	0.383	6.82	0.314	-0.08
1585	0.294	0.356	4.02	0.386	7.02	0.315	-0.08
1590	0.295	0.354	3.72	0.387	7.02	0.317	0.02
1595	0.293	0.355	4.02	0.385	7.02	0.316	0.12
1600	0.293	0.356	4.12	0.385	7.02	0.317	0.22
1605	0.29	0.356	4.42	0.386	7.42	0.316	0.42
1610	0.291	0.355	4.22	0.385	7.22	0.317	0.42
1615	0.292	0.355	4.12	0.386	7.22	0.318	0.42
1620	0.293	0.355	4.02	0.386	7.12	0.316	0.12
1625	0.293	0.361	4.62	0.383	6.82	0.315	0.02
1630	0.293	0.356	4.12	0.386	7.12	0.316	0.12
1635	0.293	0.356	4.12	0.386	7.12	0.319	0.42
1640	0.295	0.357	4.02	0.387	7.02	0.318	0.12
1645	0.291	0.358	4.52	0.39	7.72	0.316	0.32
1650	0.292	0.358	4.42	0.39	7.62	0.317	0.32
1655	0.293	0.359	4.42	0.388	7.32	0.315	0.02
1660	0.292	0.361	4.72	0.39	7.62	0.317	0.32
1665	0.293	0.358	4.32	0.389	7.42	0.317	0.22
1670	0.294	0.36	4.42	0.388	7.22	0.317	0.12
1675	0.294	0.363	4.72	0.389	7.32	0.317	0.12
1680	0.293	0.359	4.42	0.39	7.52	0.316	0.12
1685	0.293	0.362	4.72	0.392	7.72	0.316	0.12
1690	0.292	0.36	4.62	0.389	7.52	0.315	0.12
1695	0.294	0.363	4.72	0.391	7.52	0.316	0.02
1700	0.293	0.364	4.92	0.393	7.82	0.319	0.42
1705	0.293	0.362	4.72	0.392	7.72	0.314	-0.08
1710	0.291	0.364	5.12	0.391	7.82	0.315	0.22
1715	0.293	0.364	4.92	0.39	7.52	0.316	0.12
1720	0.292	0.363	4.92	0.39	7.62	0.314	0.02
1725	0.294	0.365	4.92	0.393	7.72	0.317	0.12
1730	0.295	0.365	4.82	0.39	7.32	0.317	0.02
1735	0.294	0.366	5.02	0.394	7.82	0.318	0.22
1740	0.293	0.363	4.82	0.395	8.02	0.315	0.02
1745	0.294	0.366	5.02	0.393	7.72	0.317	0.12
1750	0.293	0.365	5.02	0.397	8.22	0.318	0.32
1755	0.291	0.368	5.52	0.394	8.12	0.316	0.32
1760	0.293	0.367	5.22	0.394	7.92	0.316	0.12
1765	0.292	0.367	5.32	0.394	8.02	0.318	0.42
1770	0.293	0.366	5.12	0.394	7.92	0.318	0.32
1775	0.293	0.368	5.32	0.397	8.22	0.317	0.22
1780	0.291	0.365	5.22	0.398	8.52	0.318	0.52
1785	0.291	0.364	5.12	0.397	8.42	0.316	0.32
1790	0.294	0.365	4.92	0.398	8.22	0.317	0.12
1795	0.294	0.366	5.02	0.399	8.32	0.317	0.12
1800	0.293	0.365	5.02	0.398	8.32	0.318	0.32

## Sheet: 1000MT_Mo
Time (sec)	BG_OD360	1st_OD360	1st_ΔPi con. (μM)	2nd_OD360	2nd_ΔPi con. (μM)	3rd_OD360	3rd_ΔPi con. (μM)
	0.004	-0.016		0.012		-0.025
5	0.011	-0.009	-4.18	0.029	-0.38	-0.016	-4.88
10	0.023	-0.002	-4.68	0.042	-0.28	-0.008	-5.28
15	0.035	0.006	-5.08	0.054	-0.28	0.002	-5.48
20	0.044	0.014	-5.18	0.071	0.52	0.013	-5.28
25	0.054	0.027	-4.88	0.079	0.32	0.021	-5.48
30	0.06	0.036	-4.58	0.092	1.02	0.03	-5.18
35	0.069	0.049	-4.18	0.101	1.02	0.04	-5.08
40	0.078	0.06	-3.98	0.111	1.12	0.049	-5.08
45	0.089	0.07	-4.08	0.125	1.42	0.059	-5.18
50	0.096	0.079	-3.88	0.133	1.52	0.069	-4.88
55	0.106	0.089	-3.88	0.143	1.52	0.075	-5.28
60	0.116	0.099	-3.88	0.15	1.22	0.083	-5.48
65	0.125	0.108	-3.88	0.158	1.12	0.093	-5.38
70	0.132	0.116	-3.78	0.164	1.02	0.098	-5.58
75	0.138	0.125	-3.48	0.17	1.02	0.105	-5.48
80	0.148	0.132	-3.78	0.178	0.82	0.113	-5.68
85	0.156	0.138	-3.98	0.185	0.72	0.117	-6.08
90	0.162	0.145	-3.88	0.19	0.62	0.122	-6.18
95	0.169	0.15	-4.08	0.195	0.42	0.128	-6.28
100	0.174	0.155	-4.08	0.201	0.52	0.13	-6.58
105	0.182	0.16	-4.38	0.206	0.22	0.135	-6.88
110	0.187	0.167	-4.18	0.213	0.42	0.14	-6.88
115	0.193	0.172	-4.28	0.215	0.02	0.142	-7.28
120	0.197	0.181	-3.78	0.219	0.02	0.146	-7.28
125	0.205	0.186	-4.08	0.223	-0.38	0.151	-7.58
130	0.207	0.19	-3.88	0.227	-0.18	0.154	-7.48
135	0.213	0.195	-3.98	0.232	-0.28	0.158	-7.68
140	0.218	0.199	-4.08	0.233	-0.68	0.163	-7.68
145	0.221	0.207	-3.58	0.24	-0.28	0.165	-7.78
150	0.226	0.207	-4.08	0.244	-0.38	0.17	-7.78
155	0.23	0.214	-3.78	0.245	-0.68	0.171	-8.08
160	0.232	0.219	-3.48	0.249	-0.48	0.178	-7.58
165	0.235	0.221	-3.58	0.252	-0.48	0.184	-7.28
170	0.237	0.224	-3.48	0.257	-0.18	0.186	-7.28
175	0.244	0.228	-3.78	0.261	-0.48	0.188	-7.78
180	0.244	0.234	-3.18	0.261	-0.48	0.192	-7.38
185	0.251	0.233	-3.98	0.266	-0.68	0.194	-7.88
190	0.25	0.235	-3.68	0.269	-0.28	0.196	-7.58
195	0.254	0.24	-3.58	0.271	-0.48	0.198	-7.78
200	0.259	0.242	-3.88	0.273	-0.78	0.201	-7.98
205	0.26	0.245	-3.68	0.276	-0.58	0.203	-7.88
210	0.262	0.246	-3.78	0.278	-0.58	0.207	-7.68
215	0.263	0.252	-3.28	0.279	-0.58	0.207	-7.78
220	0.267	0.252	-3.68	0.283	-0.58	0.21	-7.88
225	0.27	0.253	-3.88	0.285	-0.68	0.211	-8.08
230	0.273	0.255	-3.98	0.287	-0.78	0.212	-8.28
235	0.275	0.259	-3.78	0.29	-0.68	0.214	-8.28
240	0.277	0.26	-3.88	0.29	-0.88	0.218	-8.08
245	0.276	0.259	-3.88	0.292	-0.58	0.22	-7.78
250	0.277	0.261	-3.78	0.296	-0.28	0.221	-7.78
255	0.281	0.266	-3.68	0.299	-0.38	0.222	-8.08
260	0.283	0.267	-3.78	0.301	-0.38	0.225	-7.98
265	0.284	0.267	-3.88	0.3	-0.58	0.226	-7.98
270	0.285	0.264	-4.28	0.302	-0.48	0.225	-8.18
275	0.29	0.271	-4.08	0.308	-0.38	0.226	-8.58
280	0.29	0.269	-4.28	0.306	-0.58	0.23	-8.18
285	0.292	0.271	-4.28	0.308	-0.58	0.229	-8.48
290	0.293	0.274	-4.08	0.31	-0.48	0.231	-8.38
295	0.293	0.274	-4.08	0.312	-0.28	0.233	-8.18
300	0.295	0.276	-4.08	0.311	-0.58	0.235	-8.18
305	0.298	0.275	-4.48	0.314	-0.58	0.233	-8.68
310	0.298	0.279	-4.08	0.318	-0.18	0.236	-8.38
315	0.3	0.278	-4.38	0.32	-0.18	0.238	-8.38
320	0.302	0.278	-4.58	0.32	-0.38	0.238	-8.58
325	0.302	0.282	-4.18	0.319	-0.48	0.239	-8.48
330	0.302	0.282	-4.18	0.322	-0.18	0.242	-8.18
335	0.306	0.283	-4.48	0.324	-0.38	0.244	-8.38
340	0.305	0.282	-4.48	0.328	0.12	0.244	-8.28
345	0.304	0.284	-4.18	0.328	0.22	0.246	-7.98
350	0.305	0.283	-4.38	0.326	-0.08	0.245	-8.18
355	0.307	0.285	-4.38	0.328	-0.08	0.246	-8.28
360	0.307	-0.98	-130.88	0.331	0.22	-0.961	-128.98
365	0.309	-0.98	-131.08	0.329	-0.18	-0.961	-129.18
370	0.309	0.252	-7.88	-0.885	-121.58	0.238	-9.28
375	0.31	0.258	-7.38	-0.887	-121.88	0.237	-9.48
380	0.311	0.262	-7.08	0.292	-4.08	0.239	-9.38
385	0.309	0.265	-6.58	0.296	-3.48	0.244	-8.68
390	0.312	0.27	-6.38	0.297	-3.68	0.247	-8.68
395	0.31	0.275	-5.68	0.301	-3.08	0.251	-8.08
400	0.312	0.278	-5.58	0.303	-3.08	0.251	-8.28
405	0.315	0.279	-5.78	0.306	-3.08	0.256	-8.08
410	0.31	0.284	-4.78	0.31	-2.18	0.26	-7.18
415	0.31	0.285	-4.68	0.31	-2.18	0.264	-6.78
420	0.314	0.287	-4.88	0.317	-1.88	0.261	-7.48
425	0.315	0.289	-4.78	0.318	-1.88	0.268	-6.88
430	0.315	0.292	-4.48	0.319	-1.78	0.27	-6.68
435	0.314	0.295	-4.08	0.322	-1.38	0.27	-6.58
440	0.312	0.295	-3.88	0.327	-0.68	0.273	-6.08
445	0.313	0.295	-3.98	0.328	-0.68	0.276	-5.88
450	0.311	0.299	-3.38	0.331	-0.18	0.277	-5.58
455	0.313	0.299	-3.58	0.333	-0.18	0.278	-5.68
460	0.313	0.301	-3.38	0.334	-0.08	0.28	-5.48
465	0.312	0.303	-3.08	0.336	0.22	0.28	-5.38
470	0.313	0.306	-2.88	0.337	0.22	0.283	-5.18
475	0.314	0.305	-3.08	0.339	0.32	0.282	-5.38
480	0.312	0.305	-2.88	0.342	0.82	0.284	-4.98
485	0.314	0.309	-2.68	0.342	0.62	0.288	-4.78
490	0.315	0.307	-2.98	0.344	0.72	0.287	-4.98
495	0.313	0.311	-2.38	0.347	1.22	0.289	-4.58
500	0.311	0.311	-2.18	0.349	1.62	0.289	-4.38
505	0.313	0.31	-2.48	0.352	1.72	0.288	-4.68
510	0.31	0.314	-1.78	0.351	1.92	0.291	-4.08
515	0.313	0.312	-2.28	0.349	1.42	0.291	-4.38
520	0.311	0.317	-1.58	0.352	1.92	0.293	-3.98
525	0.311	0.315	-1.78	0.355	2.22	0.294	-3.88
530	0.311	0.317	-1.58	0.357	2.42	0.294	-3.88
535	0.311	0.317	-1.58	0.357	2.42	0.298	-3.48
540	0.31	0.318	-1.38	0.359	2.72	0.299	-3.28
545	0.31	0.322	-0.98	0.357	2.52	0.297	-3.48
550	0.31	0.319	-1.28	0.362	3.02	0.295	-3.68
555	0.309	0.323	-0.78	0.362	3.12	0.3	-3.08
560	0.31	0.321	-1.08	0.362	3.02	0.3	-3.18
565	0.309	0.325	-0.58	0.365	3.42	0.302	-2.88
570	0.309	0.322	-0.88	0.368	3.72	0.303	-2.78
575	0.308	0.324	-0.58	0.371	4.12	0.305	-2.48
580	0.309	0.326	-0.48	0.371	4.02	0.307	-2.38
585	0.311	0.327	-0.58	0.375	4.22	0.306	-2.68
590	0.307	0.326	-0.28	0.375	4.62	0.306	-2.28
595	0.306	0.328	0.02	0.379	5.12	0.308	-1.98
600	0.306	0.329	0.12	0.381	5.32	0.308	-1.98
605	0.308	0.331	0.12	0.385	5.52	0.304	-2.58
610	0.304	0.333	0.72	0.387	6.12	0.305	-2.08
615	0.304	0.331	0.52	0.39	6.42	0.306	-1.98
620	0.306	0.337	0.92	0.392	6.42	0.308	-1.98
625	0.304	0.337	1.12	0.395	6.92	0.309	-1.68
630	0.307	0.339	1.02	0.399	7.02	0.312	-1.68
635	0.305	0.339	1.22	0.401	7.42	0.311	-1.58
640	0.303	0.339	1.42	0.404	7.92	0.314	-1.08
645	0.306	0.339	1.12	0.408	8.02	0.314	-1.38
650	0.303	0.341	1.62	0.409	8.42	0.314	-1.08
655	0.304	0.342	1.62	0.411	8.52	0.315	-1.08
660	0.303	0.342	1.72	0.414	8.92	0.32	-0.48
665	0.302	0.345	2.12	0.418	9.42	0.319	-0.48
670	0.302	0.348	2.42	0.419	9.52	0.32	-0.38
675	0.303	0.349	2.42	0.424	9.92	0.321	-0.38
680	0.305	0.352	2.52	0.428	10.12	0.322	-0.48
685	0.303	0.35	2.52	0.428	10.32	0.325	0.02
690	0.304	0.348	2.22	0.433	10.72	0.324	-0.18
695	0.304	0.35	2.42	0.437	11.12	0.325	-0.08
700	0.304	0.35	2.42	0.44	11.42	0.323	-0.28
705	0.302	0.354	3.02	0.442	11.82	0.325	0.12
710	0.302	0.355	3.12	0.446	12.22	0.323	-0.08
715	0.304	0.353	2.72	0.447	12.12	0.325	-0.08
720	0.303	0.355	3.02	0.446	12.12	0.327	0.22
725	0.3	0.355	3.32	0.451	12.92	0.325	0.32
730	0.305	0.353	2.62	0.451	12.42	0.329	0.22
735	0.302	0.356	3.22	0.453	12.92	0.328	0.42
740	0.302	0.356	3.22	0.457	13.32	0.327	0.32
745	0.302	0.359	3.52	0.462	13.82	0.331	0.72
750	0.3	0.365	4.32	0.46	13.82	0.331	0.92
755	0.3	0.361	3.92	0.465	14.32	0.333	1.12
760	0.3	0.362	4.02	0.469	14.72	0.336	1.42
765	0.301	0.364	4.12	0.468	14.52	0.339	1.62
770	0.299	0.367	4.62	0.471	15.02	0.337	1.62
775	0.301	0.365	4.22	0.473	15.02	0.34	1.72
780	0.303	0.367	4.22	0.472	14.72	0.339	1.42
785	0.298	0.367	4.72	0.48	16.02	0.341	2.12
790	0.301	0.369	4.62	0.478	15.52	0.341	1.82
795	0.302	0.368	4.42	0.479	15.52	0.343	1.92
800	0.301	0.37	4.72	0.476	15.32	0.342	1.92
805	0.301	0.369	4.62	0.48	15.72	0.343	2.02
810	0.299	0.371	5.02	0.484	16.32	0.348	2.72
815	0.3	0.371	4.92	0.488	16.62	0.344	2.22
820	0.299	0.373	5.22	0.487	16.62	0.345	2.42
825	0.299	0.371	5.02	0.489	16.82	0.347	2.62
830	0.298	0.369	4.92	0.489	16.92	0.348	2.82
835	0.298	0.372	5.22	0.489	16.92	0.346	2.62
840	0.297	0.369	5.02	0.491	17.22	0.349	3.02
845	0.296	0.372	5.42	0.491	17.32	0.349	3.12
850	0.297	0.373	5.42	0.495	17.62	0.347	2.82
855	0.298	0.371	5.12	0.49	17.02	0.349	2.92
860	0.298	0.372	5.22	0.495	17.52	0.349	2.92
865	0.297	0.372	5.32	0.496	17.72	0.353	3.42
870	0.297	0.379	6.02	0.496	17.72	0.348	2.92
875	0.298	0.377	5.72	0.495	17.52	0.348	2.82
880	0.297	0.376	5.72	0.499	18.02	0.35	3.12
885	0.296	0.379	6.12	0.496	17.82	0.349	3.12
890	0.295	0.377	6.02	0.496	17.92	0.348	3.12
895	0.299	0.38	5.92	0.499	17.82	0.348	2.72
900	0.296	0.38	6.22	0.502	18.42	0.347	2.92
905	0.298	0.382	6.22	0.499	17.92	0.348	2.82
910	0.297	0.382	6.32	0.505	18.62	0.348	2.92
915	0.296	0.384	6.62	0.5	18.22	0.351	3.32
920	0.298	0.381	6.12	0.503	18.32	0.351	3.12
925	0.295	0.384	6.72	0.502	18.52	0.35	3.32
930	0.298	0.383	6.32	0.502	18.22	0.35	3.02
935	0.295	0.386	6.92	0.501	18.42	0.354	3.72
940	0.299	0.385	6.42	0.506	18.52	0.354	3.32
945	0.299	0.386	6.52	0.506	18.52	0.355	3.42
950	0.297	0.386	6.72	0.505	18.62	0.355	3.62
955	0.298	0.385	6.52	0.504	18.42	0.353	3.32
960	0.295	0.386	6.92	0.506	18.92	0.355	3.82
965	0.295	0.389	7.22	0.507	19.02	0.355	3.82
970	0.296	0.385	6.72	0.506	18.82	0.358	4.02
975	0.295	0.386	6.92	0.509	19.22	0.355	3.82
980	0.296	0.387	6.92	0.509	19.12	0.358	4.02
985	0.297	0.388	6.92	0.512	19.32	0.357	3.82
990	0.297	0.392	7.32	0.509	19.02	0.359	4.02
995	0.297	0.389	7.02	0.507	18.82	0.358	3.92
1000	0.299	0.39	6.92	0.509	18.82	0.356	3.52
1005	0.297	0.387	6.82	0.506	18.72	0.355	3.62
1010	0.297	0.393	7.42	0.509	19.02	0.356	3.72
1015	0.297	0.392	7.32	0.507	18.82	0.354	3.52
1020	0.297	0.392	7.32	0.507	18.82	0.352	3.32
1025	0.297	0.391	7.22	0.513	19.42	0.354	3.52
1030	0.297	0.393	7.42	0.512	19.32	0.355	3.62
1035	0.295	0.394	7.72	0.51	19.32	0.357	4.02
1040	0.295	0.396	7.92	0.508	19.12	0.357	4.02
1045	0.297	0.397	7.82	0.513	19.42	0.357	3.82
1050	0.296	0.397	7.92	0.511	19.32	0.362	4.42
1055	0.306	0.401	7.32	0.512	18.42	0.363	3.52
1060	0.293	0.398	8.32	0.516	20.12	0.361	4.62
1065	0.295	0.401	8.42	0.512	19.52	0.362	4.52
1070	0.29	0.4	8.82	0.516	20.42	0.359	4.72
1075	0.292	0.401	8.72	0.516	20.22	0.362	4.82
1080	0.292	0.401	8.72	0.516	20.22	0.364	5.02
1085	0.291	0.401	8.82	0.516	20.32	0.361	4.82
1090	0.291	0.401	8.82	0.516	20.32	0.364	5.12
1095	0.292	0.406	9.22	0.517	20.32	0.361	4.72
1100	0.291	0.402	8.92	0.521	20.82	0.362	4.92
1105	0.293	0.402	8.72	0.524	20.92	0.364	4.92
1110	0.293	0.398	8.32	0.521	20.62	0.363	4.82
1115	0.292	0.402	8.82	0.522	20.82	0.366	5.22
1120	0.292	0.405	9.12	0.519	20.52	0.364	5.02
1125	0.293	0.401	8.62	0.521	20.62	0.367	5.22
1130	0.291	0.404	9.12	0.523	21.02	0.37	5.72
1135	0.291	0.403	9.02	0.526	21.32	0.369	5.62
1140	0.296	0.402	8.42	0.525	20.72	0.37	5.22
1145	0.291	0.405	9.22	0.528	21.52	0.369	5.62
1150	0.292	0.402	8.82	0.525	21.12	0.367	5.32
1155	0.29	0.404	9.22	0.528	21.62	0.369	5.72
1160	0.291	0.406	9.32	0.527	21.42	0.367	5.42
1165	0.292	0.405	9.12	0.529	21.52	0.366	5.22
1170	0.291	0.407	9.42	0.527	21.42	0.371	5.82
1175	0.291	0.402	8.92	0.527	21.42	0.37	5.72
1180	0.292	0.403	8.92	0.531	21.72	0.372	5.82
1185	0.292	0.405	9.12	0.53	21.62	0.37	5.62
1190	0.289	0.399	8.82	0.529	21.82	0.374	6.32
1195	0.289	0.405	9.42	0.528	21.72	0.375	6.42
1200	0.292	0.402	8.82	0.531	21.72	0.374	6.02
1205	0.289	0.403	9.22	0.53	21.92	0.373	6.22
1210	0.287	0.406	9.72	0.534	22.52	0.373	6.42
1215	0.287	0.406	9.72	0.534	22.52	0.374	6.52
1220	0.29	0.404	9.22	0.535	22.32	0.373	6.12
1225	0.288	0.407	9.72	0.533	22.32	0.371	6.12
1230	0.291	0.411	9.82	0.532	21.92	0.374	6.12
1235	0.291	0.409	9.62	0.534	22.12	0.371	5.82
1240	0.289	0.411	10.02	0.534	22.32	0.374	6.32
1245	0.291	0.41	9.72	0.535	22.22	0.372	5.92
1250	0.291	0.415	10.22	0.535	22.22	0.371	5.82
1255	0.29	0.412	10.02	0.537	22.52	0.376	6.42
1260	0.291	0.411	9.82	0.536	22.32	0.379	6.62
1265	0.289	0.411	10.02	0.537	22.62	0.375	6.42
1270	0.29	0.415	10.32	0.54	22.82	0.378	6.62
1275	0.29	0.414	10.22	0.54	22.82	0.377	6.52
1280	0.288	0.412	10.22	0.542	23.22	0.378	6.82
1285	0.289	0.414	10.32	0.54	22.92	0.375	6.42
1290	0.291	0.413	10.02	0.543	23.02	0.378	6.52
1295	0.288	0.414	10.42	0.543	23.32	0.38	7.02
1300	0.287	0.414	10.52	0.542	23.32	0.378	6.92
1305	0.289	0.416	10.52	0.54	22.92	0.376	6.52
1310	0.286	0.419	11.12	0.544	23.62	0.377	6.92
1315	0.288	0.418	10.82	0.543	23.32	0.377	6.72
1320	0.289	0.417	10.62	0.547	23.62	0.377	6.62
1325	0.288	0.418	10.82	0.547	23.72	0.38	7.02
1330	0.285	0.416	10.92	0.547	24.02	0.379	7.22
1335	0.286	0.421	11.32	0.545	23.72	0.381	7.32
1340	0.285	0.42	11.32	0.55	24.32	0.379	7.22
1345	0.287	0.421	11.22	0.546	23.72	0.381	7.22
1350	0.287	0.421	11.22	0.547	23.82	0.382	7.32
1355	0.287	0.42	11.12	0.545	23.62	0.384	7.52
1360	0.288	0.419	10.92	0.559	24.92	0.382	7.22
1365	0.287	0.421	11.22	0.545	23.62	0.382	7.32
1370	0.286	0.42	11.22	0.549	24.12	0.382	7.42
1375	0.287	0.418	10.92	0.549	24.02	0.382	7.32
1380	0.287	0.418	10.92	0.547	23.82	0.382	7.32
1385	0.285	0.42	11.32	0.546	23.92	0.383	7.62
1390	0.286	0.42	11.22	0.553	24.52	0.378	7.02
1395	0.285	0.421	11.42	0.553	24.62	0.38	7.32
1400	0.286	0.423	11.52	0.552	24.42	0.382	7.42
1405	0.288	0.419	10.92	0.553	24.32	0.38	7.02
1410	0.289	0.424	11.32	0.549	23.82	0.382	7.12
1415	0.287	0.425	11.62	0.553	24.42	0.384	7.52
1420	0.283	0.425	12.02	0.556	25.12	0.383	7.82
1425	0.284	0.423	11.72	0.55	24.42	0.385	7.92
1430	0.286	0.426	11.82	0.555	24.72	0.387	7.92
1435	0.286	0.423	11.52	0.558	25.02	0.385	7.72
1440	0.285	0.428	12.12	0.557	25.02	0.386	7.92
1445	0.285	0.427	12.02	0.558	25.12	0.382	7.52
1450	0.287	0.424	11.52	0.555	24.62	0.384	7.52
1455	0.287	0.426	11.72	0.556	24.72	0.387	7.82
1460	0.282	0.423	11.92	0.56	25.62	0.387	8.32
1465	0.287	0.424	11.52	0.559	25.02	0.383	7.42
1470	0.287	0.429	12.02	0.56	25.12	0.387	7.82
1475	0.287	0.425	11.62	0.564	25.52	0.384	7.52
1480	0.285	0.43	12.32	0.561	25.42	0.385	7.82
1485	0.289	0.429	11.82	0.561	25.02	0.384	7.32
1490	0.285	0.429	12.22	0.562	25.52	0.384	7.72
1495	0.285	0.427	12.02	0.561	25.42	0.383	7.62
1500	0.287	0.425	11.62	0.56	25.12	0.386	7.72
1505	0.288	0.431	12.12	0.563	25.32	0.384	7.42
1510	0.283	0.43	12.52	0.561	25.62	0.383	7.82
1515	0.285	0.428	12.12	0.564	25.72	0.385	7.82
1520	0.288	0.431	12.12	0.566	25.62	0.384	7.42
1525	0.287	0.432	12.32	0.565	25.62	0.384	7.52
1530	0.285	0.433	12.62	0.567	26.02	0.378	7.12
1535	0.285	0.434	12.72	0.564	25.72	0.384	7.72
1540	0.286	0.434	12.62	0.566	25.82	0.385	7.72
1545	0.287	0.438	12.92	0.565	25.62	0.385	7.62
1550	0.285	0.433	12.62	0.57	26.32	0.385	7.82
1555	0.284	0.433	12.72	0.567	26.12	0.387	8.12
1560	0.286	0.434	12.62	0.564	25.62	0.386	7.82
1565	0.286	0.434	12.62	0.567	25.92	0.387	7.92
1570	0.285	0.429	12.22	0.567	26.02	0.387	8.02
1575	0.285	0.433	12.62	0.566	25.92	0.387	8.02
1580	0.286	0.432	12.42	0.566	25.82	0.39	8.22
1585	0.285	0.434	12.72	0.567	26.02	0.385	7.82
1590	0.286	0.433	12.52	0.57	26.22	0.385	7.72
1595	0.285	0.433	12.62	0.566	25.92	0.389	8.22
1600	0.286	0.433	12.52	0.571	26.32	0.391	8.32
1605	0.287	0.438	12.92	0.567	25.82	0.387	7.82
1610	0.287	0.435	12.62	0.568	25.92	0.389	8.02
1615	0.287	0.433	12.42	0.567	25.82	0.39	8.12
1620	0.284	0.436	13.02	0.569	26.32	0.39	8.42
1625	0.284	0.436	13.02	0.568	26.22	0.39	8.42
1630	0.285	0.437	13.02	0.571	26.42	0.389	8.22
1635	0.286	0.438	13.02	0.572	26.42	0.39	8.22
1640	0.284	0.439	13.32	0.571	26.52	0.391	8.52
1645	0.284	0.438	13.22	0.571	26.52	0.39	8.42
1650	0.286	0.439	13.12	0.571	26.32	0.391	8.32
1655	0.285	0.443	13.62	0.568	26.12	0.391	8.42
1660	0.285	0.441	13.42	0.575	26.82	0.389	8.22
1665	0.284	0.448	14.22	0.572	26.62	0.392	8.62
1670	0.285	0.445	13.82	0.572	26.52	0.393	8.62
1675	0.284	0.445	13.92	0.572	26.62	0.39	8.42
1680	0.288	0.445	13.52	0.576	26.62	0.388	7.82
1685	0.288	0.446	13.62	0.574	26.42	0.393	8.32
1690	0.287	0.449	14.02	0.575	26.62	0.393	8.42
1695	0.286	0.446	13.82	0.575	26.72	0.393	8.52
1700	0.286	0.446	13.82	0.577	26.92	0.392	8.42
1705	0.285	0.449	14.22	0.579	27.22	0.393	8.62
1710	0.288	0.447	13.72	0.578	26.82	0.393	8.32
1715	0.285	0.442	13.52	0.579	27.22	0.391	8.42
1720	0.288	0.444	13.42	0.579	26.92	0.395	8.52
1725	0.287	0.449	14.02	0.578	26.92	0.393	8.42
1730	0.285	0.447	14.02	0.58	27.32	0.393	8.62
1735	0.285	0.451	14.42	0.577	27.02	0.395	8.82
1740	0.286	0.447	13.92	0.579	27.12	0.395	8.72
1745	0.288	0.449	13.92	0.581	27.12	0.393	8.32
1750	0.288	0.452	14.22	0.58	27.02	0.392	8.22
1755	0.287	0.451	14.22	0.579	27.02	0.395	8.62
1760	0.288	0.454	14.42	0.585	27.52	0.394	8.42
1765	0.286	0.455	14.72	0.582	27.42	0.395	8.72
1770	0.285	0.454	14.72	0.582	27.52	0.394	8.72
1775	0.286	0.451	14.32	0.582	27.42	0.396	8.82
1780	0.285	0.452	14.52	0.579	27.22	0.397	9.02
1785	0.288	0.454	14.42	0.582	27.22	0.398	8.82
1790	0.285	0.452	14.52	0.585	27.82	0.396	8.92
1795	0.286	0.453	14.52	0.584	27.62	0.397	8.92
1800	0.286	0.451	14.32	0.583	27.52	0.394	8.62

## Sheet: 3000MT_Mo
Time (sec)	BG_OD360	1st_OD360	1st_ΔPi con. (μM)	2nd_OD360	2nd_ΔPi con. (μM)	3rd_OD360	3rd_ΔPi con. (μM)
	-0.025	-0.004		-0.018		-0.018
5	-0.01	0.012	0.02	-0.006	-1.78	-0.009	-2.08
10	0.002	0.021	-0.28	0.008	-1.58	-0.001	-2.48
15	0.02	0.032	-0.98	0.018	-2.38	0.007	-3.48
20	0.032	0.042	-1.18	0.028	-2.58	0.017	-3.68
25	0.047	0.054	-1.48	0.037	-3.18	0.024	-4.48
30	0.056	0.067	-1.08	0.046	-3.18	0.034	-4.38
35	0.07	0.077	-1.48	0.055	-3.68	0.044	-4.78
40	0.079	0.088	-1.28	0.066	-3.48	0.054	-4.68
45	0.091	0.098	-1.48	0.076	-3.68	0.064	-4.88
50	0.099	0.107	-1.38	0.083	-3.78	0.072	-4.88
55	0.109	0.118	-1.28	0.089	-4.18	0.081	-4.98
60	0.12	0.126	-1.58	0.098	-4.38	0.09	-5.18
65	0.125	0.137	-0.98	0.106	-4.08	0.098	-4.88
70	0.137	0.147	-1.18	0.112	-4.68	0.105	-5.38
75	0.145	0.153	-1.38	0.121	-4.58	0.111	-5.58
80	0.153	0.162	-1.28	0.127	-4.78	0.118	-5.68
85	0.16	0.168	-1.38	0.134	-4.78	0.125	-5.68
90	0.17	0.174	-1.78	0.145	-4.68	0.133	-5.88
95	0.175	0.18	-1.68	0.146	-5.08	0.138	-5.88
100	0.183	0.186	-1.88	0.156	-4.88	0.143	-6.18
105	0.19	0.195	-1.68	0.161	-5.08	0.149	-6.28
110	0.194	0.199	-1.68	0.167	-4.88	0.152	-6.38
115	0.199	0.203	-1.78	0.171	-4.98	0.156	-6.48
120	0.206	0.206	-2.18	0.178	-4.98	0.162	-6.58
125	0.208	0.213	-1.68	0.18	-4.98	0.165	-6.48
130	0.216	0.219	-1.88	0.188	-4.98	0.168	-6.98
135	0.222	0.225	-1.88	0.191	-5.28	0.171	-7.28
140	0.225	0.228	-1.88	0.198	-4.88	0.178	-6.88
145	0.23	0.231	-2.08	0.203	-4.88	0.18	-7.18
150	0.234	0.236	-1.98	0.206	-4.98	0.183	-7.28
155	0.238	0.241	-1.88	0.212	-4.78	0.189	-7.08
160	0.244	0.242	-2.38	0.213	-5.28	0.191	-7.48
165	0.246	0.247	-2.08	0.216	-5.18	0.195	-7.28
170	0.25	0.249	-2.28	0.216	-5.58	0.198	-7.38
175	0.254	0.252	-2.38	0.22	-5.58	0.203	-7.28
180	0.256	0.255	-2.28	0.222	-5.58	0.204	-7.38
185	0.259	0.258	-2.28	0.226	-5.48	0.208	-7.28
190	0.26	0.262	-1.98	0.229	-5.28	0.212	-6.98
195	0.264	0.264	-2.18	0.231	-5.48	0.215	-7.08
200	0.266	0.266	-2.18	0.235	-5.28	0.219	-6.88
205	0.269	0.269	-2.18	0.237	-5.38	0.219	-7.18
210	0.269	0.27	-2.08	0.24	-5.08	0.225	-6.58
215	0.273	0.276	-1.88	0.241	-5.38	0.228	-6.68
220	0.274	0.278	-1.78	0.247	-4.88	0.23	-6.58
225	0.276	0.279	-1.88	0.249	-4.88	0.233	-6.48
230	0.277	0.282	-1.68	0.252	-4.68	0.234	-6.48
235	0.279	0.284	-1.68	0.255	-4.58	0.235	-6.58
240	0.28	0.286	-1.58	0.254	-4.78	0.237	-6.48
245	0.284	0.286	-1.98	0.255	-5.08	0.24	-6.58
250	0.287	0.291	-1.78	0.259	-4.98	0.24	-6.88
255	0.288	0.29	-1.98	0.263	-4.68	0.243	-6.68
260	0.288	0.293	-1.68	0.263	-4.68	0.246	-6.38
265	0.288	0.294	-1.58	0.267	-4.28	0.25	-5.98
270	0.291	0.295	-1.78	0.268	-4.48	0.248	-6.48
275	0.291	0.296	-1.68	0.272	-4.08	0.253	-5.98
280	0.294	0.297	-1.88	0.276	-3.98	0.253	-6.28
285	0.294	0.299	-1.68	0.275	-4.08	0.255	-6.08
290	0.295	0.303	-1.38	0.276	-4.08	0.255	-6.18
295	0.294	0.302	-1.38	0.277	-3.88	0.257	-5.88
300	0.294	0.305	-1.08	0.279	-3.68	0.259	-5.68
305	0.298	0.302	-1.78	0.278	-4.18	0.26	-5.98
310	0.295	0.308	-0.88	0.285	-3.18	0.261	-5.58
315	0.297	0.308	-1.08	0.283	-3.58	0.262	-5.68
320	0.299	0.309	-1.18	0.281	-3.98	0.262	-5.88
325	0.299	0.311	-0.98	0.285	-3.58	0.263	-5.78
330	0.302	0.31	-1.38	0.286	-3.78	0.265	-5.88
335	0.3	0.311	-1.08	0.286	-3.58	0.264	-5.78
340	0.299	0.312	-0.88	0.286	-3.48	-0.934	-125.48
345	0.302	0.313	-1.08	0.29	-3.38	-0.933	-125.68
350	0.301	0.314	-0.88	0.3	-2.28	0.241	-8.18
355	0.3	-0.93	-125.18	0.291	-3.08	0.243	-7.88
360	0.302	-0.929	-125.28	-0.993	-131.68	0.247	-7.68
365	0.302	0.271	-5.28	-0.994	-131.78	0.25	-7.38
370	0.302	0.271	-5.28	-0.994	-131.78	0.257	-6.68
375	0.303	0.274	-5.08	0.246	-7.88	0.261	-6.38
380	0.301	0.277	-4.58	0.255	-6.78	0.265	-5.78
385	0.303	0.279	-4.58	0.261	-6.38	0.271	-5.38
390	0.302	0.281	-4.28	0.272	-5.18	0.276	-4.78
395	0.302	0.285	-3.88	0.28	-4.38	0.279	-4.48
400	0.301	0.291	-3.18	0.288	-3.48	0.286	-3.68
405	0.298	0.293	-2.68	0.293	-2.68	0.29	-2.98
410	0.298	0.299	-2.08	0.304	-1.58	0.297	-2.28
415	0.301	0.302	-2.08	0.311	-1.18	0.299	-2.38
420	0.3	0.306	-1.58	0.317	-0.48	0.307	-1.48
425	0.3	0.311	-1.08	0.326	0.42	0.31	-1.18
430	0.302	0.314	-0.98	0.336	1.22	0.316	-0.78
435	0.301	0.315	-0.78	0.341	1.82	0.32	-0.28
440	0.302	0.322	-0.18	0.351	2.72	0.325	0.12
445	0.301	0.325	0.22	0.357	3.42	0.327	0.42
450	0.302	0.328	0.42	0.357	3.32	0.333	0.92
455	0.302	0.332	0.82	0.366	4.22	0.337	1.32
460	0.303	0.335	1.02	0.373	4.82	0.343	1.82
465	0.302	0.34	1.62	0.379	5.52	0.349	2.52
470	0.299	0.345	2.42	0.382	6.12	0.35	2.92
475	0.301	0.346	2.32	0.39	6.72	0.356	3.32
480	0.312	0.348	1.42	0.395	6.12	0.356	2.22
485	0.299	0.352	3.12	0.402	8.12	0.361	4.02
490	0.3	0.353	3.12	0.41	8.82	0.366	4.42
495	0.299	0.354	3.32	0.41	8.92	0.369	4.82
500	0.298	0.361	4.12	0.418	9.82	0.372	5.22
505	0.298	0.361	4.12	0.424	10.42	0.377	5.72
510	0.298	0.364	4.42	0.428	10.82	0.378	5.82
515	0.3	0.365	4.32	0.431	10.92	0.381	5.92
520	0.299	0.367	4.62	0.434	11.32	0.386	6.52
525	0.297	0.368	4.92	0.439	12.02	0.387	6.82
530	0.298	0.374	5.42	0.442	12.22	0.391	7.12
535	0.299	0.375	5.42	0.449	12.82	0.394	7.32
540	0.299	0.376	5.52	0.453	13.22	0.398	7.72
545	0.295	0.377	6.02	0.455	13.82	0.4	8.32
550	0.296	0.38	6.22	0.46	14.22	0.401	8.32
555	0.297	0.383	6.42	0.463	14.42	0.407	8.82
560	0.297	0.384	6.52	0.466	14.72	0.407	8.82
565	0.296	0.386	6.82	0.476	15.82	0.412	9.42
570	0.296	0.388	7.02	0.476	15.82	0.412	9.42
575	0.295	0.391	7.42	0.48	16.32	0.411	9.42
580	0.294	0.39	7.42	0.479	16.32	0.417	10.12
585	0.296	0.395	7.72	0.484	16.62	0.42	10.22
590	0.294	0.397	8.12	0.488	17.22	0.424	10.82
595	0.293	0.4	8.52	0.488	17.32	0.421	10.62
600	0.291	0.401	8.82	0.491	17.82	0.425	11.22
605	0.294	0.398	8.22	0.498	18.22	0.428	11.22
610	0.293	0.4	8.52	0.497	18.22	0.432	11.72
615	0.294	0.401	8.52	0.497	18.12	0.432	11.62
620	0.292	0.403	8.92	0.502	18.82	0.435	12.12
625	0.29	0.402	9.02	0.503	19.12	0.438	12.62
630	0.289	0.407	9.62	0.505	19.42	0.437	12.62
635	0.291	0.411	9.82	0.507	19.42	0.438	12.52
640	0.291	0.41	9.72	0.513	20.02	0.441	12.82
645	0.291	0.409	9.62	0.511	19.82	0.445	13.22
650	0.291	0.412	9.92	0.517	20.42	0.447	13.42
655	0.29	0.412	10.02	0.52	20.82	0.448	13.62
660	0.288	0.412	10.22	0.521	21.12	0.451	14.12
665	0.291	0.412	9.92	0.523	21.02	0.455	14.22
670	0.29	0.42	10.82	0.525	21.32	0.457	14.52
675	0.287	0.414	10.52	0.526	21.72	0.455	14.62
680	0.289	0.416	10.52	0.526	21.52	0.459	14.82
685	0.286	0.419	11.12	0.534	22.62	0.46	15.22
690	0.285	0.418	11.12	0.535	22.82	0.463	15.62
695	0.286	0.42	11.22	0.538	23.02	0.464	15.62
700	0.285	0.419	11.22	0.536	22.92	0.463	15.62
705	0.286	0.422	11.42	0.54	23.22	0.465	15.72
710	0.285	0.421	11.42	0.538	23.12	0.47	16.32
715	0.28	0.422	12.02	0.543	24.12	0.47	16.82
720	0.281	0.424	12.12	0.545	24.22	0.473	17.02
725	0.28	0.426	12.42	0.547	24.52	0.475	17.32
730	0.279	0.425	12.42	0.549	24.82	0.478	17.72
735	0.283	0.427	12.22	0.554	24.92	0.477	17.22
740	0.28	0.428	12.62	0.55	24.82	0.477	17.52
745	0.278	0.429	12.92	0.555	25.52	0.482	18.22
750	0.291	0.428	11.52	0.553	24.02	0.484	17.12
755	0.277	0.431	13.22	0.556	25.72	0.484	18.52
760	0.277	0.431	13.22	0.557	25.82	0.485	18.62
765	0.277	0.431	13.22	0.56	26.12	0.488	18.92
770	0.279	0.429	12.82	0.56	25.92	0.489	18.82
775	0.276	0.432	13.42	0.563	26.52	0.492	19.42
780	0.277	0.433	13.42	0.564	26.52	0.49	19.12
785	0.275	0.435	13.82	0.566	26.92	0.495	19.82
790	0.275	0.435	13.82	0.571	27.42	0.499	20.22
795	0.275	0.436	13.92	0.57	27.32	0.498	20.12
800	0.272	0.435	14.12	0.574	28.02	0.5	20.62
805	0.272	0.437	14.32	0.571	27.72	0.505	21.12
810	0.274	0.438	14.22	0.577	28.12	0.503	20.72
815	0.272	0.44	14.62	0.577	28.32	0.506	21.22
820	0.272	0.438	14.42	0.578	28.42	0.504	21.02
825	0.272	0.443	14.92	0.578	28.42	0.508	21.42
830	0.27	0.443	15.12	0.58	28.82	0.506	21.42
835	0.271	0.444	15.12	0.584	29.12	0.508	21.52
840	0.272	0.447	15.32	0.583	28.92	0.511	21.72
845	0.274	0.446	15.02	0.587	29.12	0.509	21.32
850	0.273	0.444	14.92	0.583	28.82	0.514	21.92
855	0.271	0.448	15.52	0.585	29.22	0.517	22.42
860	0.272	0.446	15.22	0.587	29.32	0.516	22.22
865	0.273	0.448	15.32	0.584	28.92	0.515	22.02
870	0.272	0.45	15.62	0.589	29.52	0.516	22.22
875	0.271	0.45	15.72	0.588	29.52	0.519	22.62
880	0.277	0.45	15.12	0.589	29.02	0.522	22.32
885	0.273	0.452	15.72	0.593	29.82	0.524	22.92
890	0.271	0.455	16.22	0.593	30.02	0.525	23.22
895	0.269	0.455	16.42	0.6	30.92	0.525	23.42
900	0.27	0.456	16.42	0.596	30.42	0.525	23.32
905	0.269	0.457	16.62	0.597	30.62	0.53	23.92
910	0.27	0.452	16.02	0.594	30.22	0.528	23.62
915	0.27	0.458	16.62	0.598	30.62	0.528	23.62
920	0.268	0.459	16.92	0.595	30.52	0.531	24.12
925	0.268	0.459	16.92	0.6	31.02	0.526	23.62
930	0.267	0.464	17.52	0.6	31.12	0.532	24.32
935	0.268	0.459	16.92	0.602	31.22	0.537	24.72
940	0.268	0.462	17.22	0.602	31.22	0.534	24.42
945	0.269	0.462	17.12	0.597	30.62	0.535	24.42
950	0.266	0.464	17.62	0.604	31.62	0.539	25.12
955	0.269	0.465	17.42	0.596	30.52	0.54	24.92
960	0.264	0.466	18.02	0.599	31.32	0.536	25.02
965	0.264	0.463	17.72	0.605	31.92	0.54	25.42
970	0.265	0.469	18.22	0.603	31.62	0.539	25.22
975	0.269	0.468	17.72	0.604	31.32	0.539	24.82
980	0.267	0.466	17.72	0.604	31.52	0.545	25.62
985	0.266	0.469	18.12	0.603	31.52	0.543	25.52
990	0.268	0.474	18.42	0.605	31.52	0.544	25.42
995	0.27	0.47	17.82	0.606	31.42	0.541	24.92
1000	0.268	0.476	18.62	0.602	31.22	0.542	25.22
1005	0.27	0.474	18.22	0.605	31.32	0.545	25.32
1010	0.269	0.471	18.02	0.601	31.02	0.545	25.42
1015	0.27	0.479	18.72	0.606	31.42	0.546	25.42
1020	0.272	0.475	18.12	0.604	31.02	0.544	25.02
1025	0.27	0.476	18.42	0.606	31.42	0.547	25.52
1030	0.273	0.481	18.62	0.6	30.52	0.55	25.52
1035	0.27	0.476	18.42	0.605	31.32	0.548	25.62
1040	0.27	0.477	18.52	0.605	31.32	0.55	25.82
1045	0.269	0.478	18.72	0.605	31.42	0.552	26.12
1050	0.268	0.478	18.82	0.604	31.42	0.552	26.22
1055	0.269	0.477	18.62	0.605	31.42	0.546	25.52
1060	0.267	0.484	19.52	0.607	31.82	0.551	26.22
1065	0.271	0.48	18.72	0.609	31.62	0.554	26.12
1070	0.269	0.483	19.22	0.609	31.82	0.551	26.02
1075	0.268	0.486	19.62	0.611	32.12	0.552	26.22
1080	0.27	0.485	19.32	0.608	31.62	0.556	26.42
1085	0.27	0.488	19.62	0.608	31.62	0.557	26.52
1090	0.267	0.487	19.82	0.615	32.62	0.559	27.02
1095	0.271	0.488	19.52	0.611	31.82	0.556	26.32
1100	0.268	0.489	19.92	0.613	32.32	0.558	26.82
1105	0.269	0.49	19.92	0.613	32.22	0.556	26.52
1110	0.27	0.489	19.72	0.616	32.42	0.56	26.82
1115	0.272	0.494	20.02	0.614	32.02	0.555	26.12
1120	0.272	0.49	19.62	0.611	31.72	0.56	26.62
1125	0.273	0.493	19.82	0.614	31.92	0.563	26.82
1130	0.273	0.494	19.92	0.612	31.72	0.564	26.92
1135	0.273	0.493	19.82	0.612	31.72	0.563	26.82
1140	0.27	0.493	20.12	0.616	32.42	0.564	27.22
1145	0.274	0.497	20.12	0.614	31.82	0.565	26.92
1150	0.274	0.499	20.32	0.612	31.62	0.566	27.02
1155	0.272	0.498	20.42	0.617	32.32	0.565	27.12
1160	0.271	0.501	20.82	0.619	32.62	0.563	27.02
1165	0.272	0.5	20.62	0.618	32.42	0.567	27.32
1170	0.271	0.5	20.72	0.621	32.82	0.564	27.12
1175	0.271	0.499	20.62	0.619	32.62	0.57	27.72
1180	0.273	0.503	20.82	0.62	32.52	0.567	27.22
1185	0.273	0.502	20.72	0.621	32.62	0.567	27.22
1190	0.272	0.506	21.22	0.619	32.52	0.569	27.52
1195	0.273	0.502	20.72	0.617	32.22	0.569	27.42
1200	0.275	0.506	20.92	0.617	32.02	0.569	27.22
1205	0.274	0.502	20.62	0.618	32.22	0.569	27.32
1210	0.272	0.506	21.22	0.622	32.82	0.568	27.42
1215	0.272	0.508	21.42	0.619	32.52	0.571	27.72
1220	0.273	0.509	21.42	0.622	32.72	0.571	27.62
1225	0.273	0.509	21.42	0.617	32.22	0.573	27.82
1230	0.272	0.51	21.62	0.624	33.02	0.575	28.12
1235	0.273	0.512	21.72	0.622	32.72	0.574	27.92
1240	0.274	0.509	21.32	0.625	32.92	0.573	27.72
1245	0.273	0.509	21.42	0.631	33.62	0.575	28.02
1250	0.275	0.514	21.72	0.623	32.62	0.578	28.12
1255	0.272	0.516	22.22	0.625	33.12	0.575	28.12
1260	0.272	0.513	21.92	0.625	33.12	0.576	28.22
1265	0.272	0.517	22.32	0.626	33.22	0.576	28.22
1270	0.272	0.516	22.22	0.629	33.52	0.577	28.32
1275	0.273	0.518	22.32	0.63	33.52	0.581	28.62
1280	0.271	0.52	22.72	0.633	34.02	0.577	28.42
1285	0.275	0.519	22.22	0.63	33.32	0.58	28.32
1290	0.276	0.521	22.32	0.629	33.12	0.581	28.32
1295	0.274	0.52	22.42	0.632	33.62	0.58	28.42
1300	0.273	0.52	22.52	0.634	33.92	0.582	28.72
1305	0.274	0.522	22.62	0.636	34.02	0.582	28.62
1310	0.271	0.528	23.52	0.634	34.12	0.581	28.82
1315	0.273	0.524	22.92	0.633	33.82	0.578	28.32
1320	0.272	0.523	22.92	0.638	34.42	0.58	28.62
1325	0.274	0.532	23.62	0.634	33.82	0.579	28.32
1330	0.274	0.529	23.32	0.633	33.72	0.584	28.82
1335	0.274	0.529	23.32	0.639	34.32	0.586	29.02
1340	0.27	0.528	23.62	0.64	34.82	0.585	29.32
1345	0.27	0.531	23.92	0.637	34.52	0.584	29.22
1350	0.27	0.53	23.82	0.638	34.62	0.585	29.32
1355	0.274	0.531	23.52	0.634	33.82	0.588	29.22
1360	0.273	0.533	23.82	0.634	33.92	0.583	28.82
1365	0.275	0.533	23.62	0.634	33.72	0.588	29.12
1370	0.274	0.532	23.62	0.639	34.32	0.587	29.12
1375	0.278	0.535	23.52	0.638	33.82	0.59	29.02
1380	0.277	0.535	23.62	0.641	34.22	0.587	28.82
1385	0.274	0.538	24.22	0.636	34.02	0.592	29.62
1390	0.276	0.537	23.92	0.635	33.72	0.591	29.32
1395	0.277	0.539	24.02	0.634	33.52	0.594	29.52
1400	0.275	0.536	23.92	0.638	34.12	0.593	29.62
1405	0.274	0.539	24.32	0.637	34.12	0.594	29.82
1410	0.274	0.536	24.02	0.635	33.92	0.594	29.82
1415	0.278	0.538	23.82	0.641	34.12	0.593	29.32
1420	0.274	0.542	24.62	0.643	34.72	0.596	30.02
1425	0.274	0.546	25.02	0.639	34.32	0.594	29.82
1430	0.275	0.541	24.42	0.643	34.62	0.596	29.92
1435	0.276	0.543	24.52	0.639	34.12	0.598	30.02
1440	0.274	0.544	24.82	0.642	34.62	0.599	30.32
1445	0.276	0.548	25.02	0.638	34.02	0.593	29.52
1450	0.274	0.547	25.12	0.642	34.62	0.595	29.92
1455	0.273	0.547	25.22	0.639	34.42	0.597	30.22
1460	0.276	0.549	25.12	0.643	34.52	0.601	30.32
1465	0.276	0.549	25.12	0.647	34.92	0.595	29.72
1470	0.276	0.549	25.12	0.645	34.72	0.6	30.22
1475	0.278	0.552	25.22	0.643	34.32	0.602	30.22
1480	0.277	0.548	24.92	0.646	34.72	0.602	30.32
1485	0.278	0.547	24.72	0.643	34.32	0.602	30.22
1490	0.278	0.553	25.32	0.645	34.52	0.606	30.62
1495	0.278	0.552	25.22	0.642	34.22	0.605	30.52
1500	0.275	0.551	25.42	0.648	35.12	0.602	30.52
1505	0.277	0.552	25.32	0.65	35.12	0.602	30.32
1510	0.278	0.555	25.52	0.643	34.32	0.605	30.52
1515	0.278	0.553	25.32	0.65	35.02	0.606	30.62
1520	0.277	0.553	25.42	0.649	35.02	0.606	30.72
1525	0.276	0.556	25.82	0.647	34.92	0.607	30.92
1530	0.277	0.554	25.52	0.647	34.82	0.607	30.82
1535	0.277	0.555	25.62	0.649	35.02	0.607	30.82
1540	0.277	0.555	25.62	0.649	35.02	0.602	30.32
1545	0.278	0.562	26.22	0.651	35.12	0.609	30.92
1550	0.278	0.557	25.72	0.651	35.12	0.609	30.92
1555	0.277	0.56	26.12	0.649	35.02	0.612	31.32
1560	0.277	0.563	26.42	0.65	35.12	0.611	31.22
1565	0.278	0.563	26.32	0.651	35.12	0.61	31.02
1570	0.278	0.563	26.32	0.656	35.62	0.613	31.32
1575	0.279	0.563	26.22	0.654	35.32	0.617	31.62
1580	0.279	0.563	26.22	0.652	35.12	0.613	31.22
1585	0.278	0.564	26.42	0.655	35.52	0.612	31.22
1590	0.277	0.561	26.22	0.648	34.92	0.614	31.52
1595	0.279	0.564	26.32	0.652	35.12	0.618	31.72
1600	0.278	0.566	26.62	0.66	36.02	0.616	31.62
1605	0.279	0.565	26.42	0.655	35.42	0.611	31.02
1610	0.278	0.568	26.82	0.655	35.52	0.614	31.42
1615	0.28	0.563	26.12	0.657	35.52	0.616	31.42
1620	0.277	0.567	26.82	0.655	35.62	0.616	31.72
1625	0.274	0.569	27.32	0.663	36.72	0.613	31.72
1630	0.277	0.57	27.12	0.657	35.82	0.616	31.72
1635	0.277	0.569	27.02	0.655	35.62	0.618	31.92
1640	0.278	0.57	27.02	0.656	35.62	0.617	31.72
1645	0.278	0.572	27.22	0.654	35.42	0.619	31.92
1650	0.278	0.571	27.12	0.66	36.02	0.621	32.12
1655	0.278	0.573	27.32	0.661	36.12	0.62	32.02
1660	0.278	0.58	28.02	0.662	36.22	0.622	32.22
1665	0.279	0.57	26.92	0.663	36.22	0.623	32.22
1670	0.281	0.573	27.02	0.663	36.02	0.622	31.92
1675	0.277	0.578	27.92	0.662	36.32	0.619	32.02
1680	0.278	0.578	27.82	0.663	36.32	0.622	32.22
1685	0.28	0.574	27.22	0.659	35.72	0.62	31.82
1690	0.279	0.574	27.32	0.664	36.32	0.624	32.32
1695	0.28	0.577	27.52	0.665	36.32	0.622	32.02
1700	0.281	0.583	28.02	0.662	35.92	0.626	32.32
1705	0.281	0.579	27.62	0.668	36.52	0.625	32.22
1710	0.282	0.579	27.52	0.663	35.92	0.623	31.92
1715	0.28	0.582	28.02	0.666	36.42	0.626	32.42
1720	0.28	0.58	27.82	0.667	36.52	0.625	32.32
1725	0.282	0.584	28.02	0.669	36.52	0.626	32.22
1730	0.281	0.582	27.92	0.667	36.42	0.624	32.12
1735	0.281	0.585	28.22	0.665	36.22	0.626	32.32
1740	0.28	0.586	28.42	0.665	36.32	0.628	32.62
1745	0.28	0.588	28.62	0.663	36.12	0.627	32.52
1750	0.281	0.586	28.32	0.669	36.62	0.628	32.52
1755	0.28	0.589	28.72	0.668	36.62	0.632	33.02
1760	0.28	0.582	28.02	0.671	36.92	0.632	33.02
1765	0.28	0.587	28.52	0.671	36.92	0.633	33.12
1770	0.283	0.593	28.82	0.67	36.52	0.631	32.62
1775	0.282	0.594	29.02	0.667	36.32	0.632	32.82
1780	0.282	0.59	28.62	0.673	36.92	0.629	32.52
1785	0.282	0.594	29.02	0.668	36.42	0.63	32.62
1790	0.282	0.594	29.02	0.673	36.92	0.637	33.32
1795	0.278	0.592	29.22	0.676	37.62	0.632	33.22
1800	0.282	0.606	30.22	0.671	36.72	0.632	32.82

## Sheet: 10000MT_Mo
Time (sec)	BG_OD360	1st_OD360	1st_ΔPi con. (μM)	2nd_OD360	2nd_ΔPi con. (μM)	3rd_OD360	3rd_ΔPi con. (μM)
	-0.022	-0.03		-0.045		-0.057
5	-0.014	-0.01	-1.78	-0.021	-2.88	-0.048	-5.58
10	-0.007	0.005	-0.98	-0.007	-2.18	-0.041	-5.58
15	0	0.016	-0.58	0.002	-1.98	-0.036	-5.78
20	0.012	0.027	-0.68	0.011	-2.28	-0.032	-6.58
25	0.019	0.034	-0.68	0.023	-1.78	-0.028	-6.88
30	0.028	0.046	-0.38	0.032	-1.78	-0.023	-7.28
35	0.034	0.054	-0.18	0.042	-1.38	-0.018	-7.38
40	0.041	0.063	0.02	0.049	-1.38	-0.014	-7.68
45	0.049	0.071	0.02	0.059	-1.18	-0.012	-8.28
50	0.059	0.076	-0.48	0.064	-1.68	-0.005	-8.58
55	0.065	0.087	0.02	0.069	-1.78	0	-8.68
60	0.071	0.095	0.22	0.078	-1.48	0.006	-8.68
65	0.078	0.1	0.02	0.081	-1.88	0.009	-9.08
70	0.085	0.107	0.02	0.089	-1.78	0.015	-9.18
75	0.089	0.115	0.42	0.092	-1.88	0.018	-9.28
80	0.098	0.119	-0.08	0.096	-2.38	0.023	-9.68
85	0.105	0.128	0.12	0.103	-2.38	0.029	-9.78
90	0.109	0.131	0.02	0.107	-2.38	0.035	-9.58
95	0.117	0.136	-0.28	0.111	-2.78	0.039	-9.98
100	0.121	0.144	0.12	0.113	-2.98	0.042	-10.08
105	0.126	0.147	-0.08	0.116	-3.18	0.047	-10.08
110	0.132	0.151	-0.28	0.122	-3.18	0.051	-10.28
115	0.136	0.156	-0.18	0.124	-3.38	0.054	-10.38
120	0.14	0.159	-0.28	0.13	-3.18	0.059	-10.28
125	0.146	0.163	-0.48	0.131	-3.68	0.063	-10.48
130	0.152	0.167	-0.68	0.135	-3.88	0.068	-10.58
135	0.155	0.169	-0.78	0.137	-3.98	0.072	-10.48
140	0.161	0.175	-0.78	0.14	-4.28	0.078	-10.48
145	0.164	0.178	-0.78	0.144	-4.18	0.081	-10.48
150	0.166	0.182	-0.58	0.148	-3.98	0.085	-10.28
155	0.169	0.185	-0.58	0.152	-3.88	0.087	-10.38
160	0.173	0.188	-0.68	0.155	-3.98	0.091	-10.38
165	0.179	0.191	-0.98	0.158	-4.28	0.098	-10.28
170	0.179	0.197	-0.38	0.162	-3.88	0.1	-10.08
175	0.182	0.198	-0.58	0.163	-4.08	0.103	-10.08
180	0.185	0.196	-1.08	0.167	-3.98	0.107	-9.98
185	0.188	0.202	-0.78	0.168	-4.18	0.109	-10.08
190	0.191	0.205	-0.78	0.173	-3.98	0.113	-9.98
195	0.195	0.207	-0.98	0.174	-4.28	0.119	-9.78
200	0.197	0.21	-0.88	0.179	-3.98	0.122	-9.68
205	0.2	0.21	-1.18	0.181	-4.08	0.122	-9.98
210	0.202	0.213	-1.08	0.184	-3.98	0.129	-9.48
215	0.206	0.217	-1.08	0.184	-4.38	0.131	-9.68
220	0.209	0.216	-1.48	0.187	-4.38	0.132	-9.88
225	0.208	0.217	-1.28	0.19	-3.98	0.137	-9.28
230	0.213	0.219	-1.58	0.19	-4.48	0.138	-9.68
235	0.215	0.22	-1.68	0.195	-4.18	0.141	-9.58
240	0.215	0.221	-1.58	0.192	-4.48	0.144	-9.28
245	0.216	0.225	-1.28	0.196	-4.18	0.148	-8.98
250	0.222	0.225	-1.88	0.199	-4.48	0.152	-9.18
255	0.221	0.226	-1.68	0.204	-3.88	0.152	-9.08
260	0.222	0.229	-1.48	0.204	-3.98	0.154	-8.98
265	0.224	0.232	-1.38	0.209	-3.68	0.157	-8.88
270	0.226	0.231	-1.68	0.21	-3.78	0.161	-8.68
275	0.228	0.232	-1.78	0.212	-3.78	0.162	-8.78
280	0.23	0.234	-1.78	0.212	-3.98	0.164	-8.78
285	0.234	0.234	-2.18	0.216	-3.98	0.165	-9.08
290	0.234	0.234	-2.18	0.215	-4.08	0.166	-8.98
295	0.237	0.238	-2.08	0.217	-4.18	0.172	-8.68
300	0.238	0.239	-2.08	0.218	-4.18	0.168	-9.18
305	0.239	0.24	-2.08	0.221	-3.98	0.173	-8.78
310	0.238	0.241	-1.88	0.222	-3.78	0.173	-8.68
315	0.241	0.241	-2.18	0.221	-4.18	0.178	-8.48
320	0.241	0.241	-2.18	0.227	-3.58	0.181	-8.18
325	0.241	0.244	-1.88	0.222	-4.08	0.18	-8.28
330	0.245	0.244	-2.28	0.228	-3.88	0.181	-8.58
335	0.244	0.246	-1.98	0.23	-3.58	0.18	-8.58
340	0.247	0.247	-2.18	0.226	-4.28	0.183	-8.58
345	0.248	-1.119	-138.88	0.233	-3.68	0.182	-8.78
350	0.25	-1.119	-139.08	0.23	-4.18	0.186	-8.58
355	0.248	0.241	-2.88	0.234	-3.58	-1.146	-141.58
360	0.251	0.245	-2.78	0.234	-3.88	-1.146	-141.88
365	0.255	0.246	-3.08	0.235	-4.18	0.187	-8.98
370	0.253	0.242	-3.28	0.239	-3.58	0.191	-8.38
375	0.253	0.244	-3.08	0.239	-3.58	0.194	-8.08
380	0.257	0.245	-3.38	0.24	-3.88	0.197	-8.18
385	0.253	0.249	-2.58	0.24	-3.48	0.198	-7.68
390	0.259	0.25	-3.08	0.241	-3.98	0.203	-7.78
395	0.262	0.252	-3.18	0.242	-4.18	0.207	-7.68
400	0.26	0.253	-2.88	0.248	-3.38	0.209	-7.28
405	0.258	0.259	-2.08	-1.144	-142.38	0.215	-6.48
410	0.259	0.265	-1.58	-1.144	-142.48	0.223	-5.78
415	0.257	0.268	-1.08	0.215	-6.38	0.225	-5.38
420	0.262	0.271	-1.28	0.222	-6.18	0.231	-5.28
425	0.257	0.279	0.02	0.226	-5.28	0.238	-4.08
430	0.259	0.286	0.52	0.238	-4.28	0.241	-3.98
435	0.264	0.289	0.32	0.248	-3.78	0.251	-3.48
440	0.26	0.291	0.92	0.252	-2.98	0.249	-3.28
445	0.258	0.296	1.62	0.259	-2.08	0.26	-1.98
450	0.262	0.3	1.62	0.269	-1.48	0.266	-1.78
455	0.265	0.303	1.62	0.278	-0.88	0.269	-1.78
460	0.261	0.308	2.52	0.285	0.22	0.277	-0.58
465	0.261	0.313	3.02	0.294	1.12	0.279	-0.38
470	0.264	0.316	3.02	0.301	1.52	0.284	-0.18
475	0.264	0.32	3.42	0.309	2.32	0.288	0.22
480	0.263	0.323	3.82	0.316	3.12	0.294	0.92
485	0.265	0.329	4.22	0.322	3.52	0.298	1.12
490	0.267	0.33	4.12	0.329	4.02	0.3	1.12
495	0.266	0.334	4.62	0.334	4.62	0.306	1.82
500	0.266	0.338	5.02	0.346	5.82	0.311	2.32
505	0.267	0.339	5.02	0.349	6.02	0.314	2.52
510	0.264	0.34	5.42	0.355	6.92	0.316	3.02
515	0.265	0.347	6.02	0.366	7.92	0.319	3.22
520	0.269	0.349	5.82	0.366	7.52	0.322	3.12
525	0.267	0.353	6.42	0.37	8.12	0.325	3.62
530	0.263	0.356	7.12	0.379	9.42	0.327	4.22
535	0.27	0.356	6.42	0.378	8.62	0.33	3.82
540	0.269	0.359	6.82	0.384	9.32	0.335	4.42
545	0.269	0.364	7.32	0.39	9.92	0.338	4.72
550	0.266	0.364	7.62	0.395	10.72	0.338	5.02
555	0.267	0.366	7.72	0.399	11.02	0.34	5.12
560	0.268	0.369	7.92	0.4	11.02	0.34	5.02
565	0.268	0.373	8.32	0.405	11.52	0.348	5.82
570	0.264	0.377	9.12	0.4	11.42	0.349	6.32
575	0.266	0.375	8.72	0.409	12.12	0.35	6.22
580	0.264	0.379	9.32	0.409	12.32	0.349	6.32
585	0.268	0.377	8.72	0.411	12.12	0.355	6.52
590	0.267	0.38	9.12	0.418	12.92	0.357	6.82
595	0.266	0.38	9.22	0.421	13.32	0.358	7.02
600	0.269	0.385	9.42	0.421	13.02	0.36	6.92
605	0.267	0.386	9.72	0.425	13.62	0.357	6.82
610	0.267	0.389	10.02	0.421	13.22	0.361	7.22
615	0.268	0.391	10.12	0.427	13.72	0.362	7.22
620	0.27	0.393	10.12	0.43	13.82	0.366	7.42
625	0.266	0.397	10.92	0.434	14.62	0.366	7.82
630	0.271	0.397	10.42	0.434	14.12	0.366	7.32
635	0.268	0.398	10.82	0.434	14.42	0.366	7.62
640	0.271	0.399	10.62	0.441	14.82	0.367	7.42
645	0.269	0.4	10.92	0.436	14.52	0.371	8.02
650	0.265	0.402	11.52	0.444	15.72	0.371	8.42
655	0.264	0.406	12.02	0.445	15.92	0.371	8.52
660	0.265	0.4	11.32	0.447	16.02	0.375	8.82
665	0.265	0.404	11.72	0.454	16.72	0.375	8.82
670	0.268	0.407	11.72	0.451	16.12	0.38	9.02
675	0.264	0.411	12.52	0.456	17.02	0.379	9.32
680	0.268	0.412	12.22	0.457	16.72	0.38	9.02
685	0.267	0.412	12.32	0.455	16.62	0.378	8.92
690	0.267	0.415	12.62	0.456	16.72	0.384	9.52
695	0.266	0.417	12.92	0.459	17.12	0.386	9.82
700	0.268	0.42	13.02	0.459	16.92	0.386	9.62
705	0.265	0.414	12.72	0.463	17.62	0.387	10.02
710	0.267	0.418	12.92	0.464	17.52	0.385	9.62
715	0.267	0.423	13.42	0.463	17.42	0.387	9.82
720	0.264	0.421	13.52	0.473	18.72	0.39	10.42
725	0.264	0.419	13.32	0.472	18.62	0.394	10.82
730	0.265	0.422	13.52	0.467	18.02	0.39	10.32
735	0.263	0.422	13.72	0.476	19.12	0.393	10.82
740	0.263	0.428	14.32	0.474	18.92	0.387	10.22
745	0.263	0.429	14.42	0.477	19.22	0.396	11.12
750	0.267	0.427	13.82	0.475	18.62	0.391	10.22
755	0.264	0.432	14.62	0.475	18.92	0.394	10.82
760	0.262	0.433	14.92	0.478	19.42	0.396	11.22
765	0.262	0.43	14.62	0.484	20.02	0.399	11.52
770	0.264	0.434	14.82	0.481	19.52	0.398	11.22
775	0.264	0.433	14.72	0.484	19.82	0.4	11.42
780	0.263	0.433	14.82	0.483	19.82	0.399	11.42
785	0.266	0.439	15.12	0.488	20.02	0.402	11.42
790	0.261	0.44	15.72	0.488	20.52	0.4	11.72
795	0.26	0.439	15.72	0.495	21.32	0.402	12.02
800	0.259	0.437	15.62	0.492	21.12	0.404	12.32
805	0.261	0.442	15.92	0.494	21.12	0.405	12.22
810	0.262	0.44	15.62	0.494	21.02	0.405	12.12
815	0.26	0.44	15.82	0.502	22.02	0.406	12.42
820	0.258	0.446	16.62	0.499	21.92	0.41	13.02
825	0.263	0.446	16.12	0.498	21.32	0.411	12.62
830	0.258	0.448	16.82	0.495	21.52	0.411	13.12
835	0.262	0.444	16.02	0.502	21.82	0.41	12.62
840	0.261	0.451	16.82	0.508	22.52	0.412	12.92
845	0.259	0.448	16.72	0.502	22.12	0.408	12.72
850	0.261	0.453	17.02	0.51	22.72	0.412	12.92
855	0.262	0.448	16.42	0.505	22.12	0.407	12.32
860	0.258	0.454	17.42	0.513	23.32	0.413	13.32
865	0.254	0.45	17.42	0.505	22.92	0.414	13.82
870	0.258	0.451	17.12	0.51	23.02	0.412	13.22
875	0.255	0.452	17.52	0.512	23.52	0.409	13.22
880	0.259	0.454	17.32	0.511	23.02	0.417	13.62
885	0.259	0.457	17.62	0.516	23.52	0.416	13.52
890	0.255	0.457	18.02	0.515	23.82	0.417	14.02
895	0.255	0.458	18.12	0.516	23.92	0.419	14.22
900	0.256	0.461	18.32	0.52	24.22	0.419	14.12
905	0.259	0.455	17.42	0.519	23.82	0.423	14.22
910	0.256	0.461	18.32	0.518	24.02	0.421	14.32
915	0.253	0.466	19.12	0.52	24.52	0.422	14.72
920	0.257	0.46	18.12	0.517	23.82	0.421	14.22
925	0.257	0.467	18.82	0.525	24.62	0.423	14.42
930	0.254	0.461	18.52	0.524	24.82	0.422	14.62
935	0.253	0.465	19.02	0.523	24.82	0.423	14.82
940	0.253	0.468	19.32	0.525	25.02	0.426	15.12
945	0.254	0.465	18.92	0.52	24.42	0.424	14.82
950	0.253	0.466	19.12	0.525	25.02	0.425	15.02
955	0.251	0.466	19.32	0.531	25.82	0.425	15.22
960	0.253	0.47	19.52	0.531	25.62	0.427	15.22
965	0.255	0.467	19.02	0.529	25.22	0.425	14.82
970	0.256	0.471	19.32	0.53	25.22	0.432	15.42
975	0.252	0.473	19.92	0.53	25.62	0.432	15.82
980	0.253	0.47	19.52	0.529	25.42	0.431	15.62
985	0.249	0.476	20.52	0.532	26.12	0.429	15.82
990	0.251	0.476	20.32	0.537	26.42	0.435	16.22
995	0.254	0.473	19.72	0.536	26.02	0.434	15.82
1000	0.251	0.475	20.22	0.532	25.92	0.434	16.12
1005	0.25	0.478	20.62	0.542	27.02	0.434	16.22
1010	0.25	0.478	20.62	0.537	26.52	0.438	16.62
1015	0.249	0.479	20.82	0.54	26.92	0.436	16.52
1020	0.249	0.482	21.12	0.542	27.12	0.436	16.52
1025	0.248	0.48	21.02	0.549	27.92	0.437	16.72
1030	0.248	0.483	21.32	0.541	27.12	0.443	17.32
1035	0.247	0.486	21.72	0.545	27.62	0.437	16.82
1040	0.248	0.483	21.32	0.547	27.72	0.441	17.12
1045	0.246	0.483	21.52	0.548	28.02	0.437	16.92
1050	0.247	0.486	21.72	0.552	28.32	0.438	16.92
1055	0.249	0.486	21.52	0.551	28.02	0.442	17.12
1060	0.245	0.485	21.82	0.553	28.62	0.441	17.42
1065	0.247	0.489	22.02	0.554	28.52	0.446	17.72
1070	0.246	0.486	21.82	0.557	28.92	0.443	17.52
1075	0.246	0.486	21.82	0.559	29.12	0.443	17.52
1080	0.243	0.489	22.42	0.561	29.62	0.444	17.92
1085	0.247	0.494	22.52	0.556	28.72	0.453	18.42
1090	0.248	0.492	22.22	0.56	29.02	0.445	17.52
1095	0.248	0.49	22.02	0.565	29.52	0.446	17.62
1100	0.248	0.494	22.42	0.566	29.62	0.448	17.82
1105	0.248	0.492	22.22	0.563	29.32	0.45	18.02
1110	0.248	0.492	22.22	0.565	29.52	0.453	18.32
1115	0.246	0.494	22.62	0.563	29.52	0.448	18.02
1120	0.245	0.498	23.12	0.568	30.12	0.445	17.82
1125	0.246	0.495	22.72	0.569	30.12	0.455	18.72
1130	0.25	0.495	22.32	0.573	30.12	0.454	18.22
1135	0.246	0.492	22.42	0.57	30.22	0.452	18.42
1140	0.245	0.495	22.82	0.577	31.02	0.455	18.82
1145	0.246	0.5	23.22	0.576	30.82	0.456	18.82
1150	0.244	0.5	23.42	0.573	30.72	0.46	19.42
1155	0.245	0.501	23.42	0.577	31.02	0.453	18.62
1160	0.248	0.502	23.22	0.577	30.72	0.457	18.72
1165	0.244	0.502	23.62	0.576	31.02	0.452	18.62
1170	0.243	0.501	23.62	0.575	31.02	0.455	19.02
1175	0.244	0.505	23.92	0.583	31.72	0.46	19.42
1180	0.242	0.504	24.02	0.586	32.22	0.46	19.62
1185	0.242	0.501	23.72	0.583	31.92	0.458	19.42
1190	0.243	0.503	23.82	0.581	31.62	0.457	19.22
1195	0.243	0.504	23.92	0.589	32.42	0.455	19.02
1200	0.247	0.502	23.32	0.59	32.12	0.461	19.22
1205	0.243	0.506	24.12	0.586	32.12	0.463	19.82
1210	0.246	0.504	23.62	0.59	32.22	0.464	19.62
1215	0.249	0.505	23.42	0.6	32.92	0.464	19.32
1220	0.25	0.509	23.72	0.584	31.22	0.466	19.42
1225	0.247	0.508	23.92	0.598	32.92	0.467	19.82
1230	0.247	0.509	24.02	0.598	32.92	0.469	20.02
1235	0.251	0.508	23.52	0.596	32.32	0.467	19.42
1240	0.249	0.513	24.22	0.599	32.82	0.468	19.72
1245	0.252	0.51	23.62	0.598	32.42	0.472	19.82
1250	0.248	0.517	24.72	0.594	32.42	0.467	19.72
1255	0.25	0.515	24.32	0.605	33.32	0.469	19.72
1260	0.25	0.514	24.22	0.603	33.12	0.471	19.92
1265	0.249	0.514	24.32	0.596	32.52	0.471	20.02
1270	0.246	0.515	24.72	0.6	33.22	0.473	20.52
1275	0.252	0.519	24.52	0.6	32.62	0.478	20.42
1280	0.263	0.52	23.52	0.609	32.42	0.47	18.52
1285	0.248	0.52	25.02	0.615	34.52	0.476	20.62
1290	0.248	0.519	24.92	0.606	33.62	0.475	20.52
1295	0.252	0.521	24.72	0.611	33.72	0.471	19.72
1300	0.251	0.524	25.12	0.613	34.02	0.478	20.52
1305	0.248	0.524	25.42	0.609	33.92	0.481	21.12
1310	0.25	0.529	25.72	0.614	34.22	0.474	20.22
1315	0.248	0.53	26.02	0.618	34.82	0.482	21.22
1320	0.249	0.525	25.42	0.62	34.92	0.48	20.92
1325	0.249	0.528	25.72	0.613	34.22	0.479	20.82
1330	0.249	0.527	25.62	0.619	34.82	0.478	20.72
1335	0.249	0.531	26.02	0.618	34.72	0.484	21.32
1340	0.252	0.533	25.92	0.621	34.72	0.482	20.82
1345	0.249	0.529	25.82	0.621	35.02	0.484	21.32
1350	0.248	0.531	26.12	0.616	34.62	0.483	21.32
1355	0.252	0.531	25.72	0.623	34.92	0.484	21.02
1360	0.253	0.526	25.12	0.624	34.92	0.478	20.32
1365	0.254	0.529	25.32	0.615	33.92	0.483	20.72
1370	0.251	0.531	25.82	0.623	35.02	0.483	21.02
1375	0.248	0.525	25.52	0.62	35.02	0.49	22.02
1380	0.251	0.535	26.22	0.627	35.42	0.489	21.62
1385	0.25	0.533	26.12	0.621	34.92	0.489	21.72
1390	0.253	0.538	26.32	0.628	35.32	0.491	21.62
1395	0.25	0.531	25.92	0.626	35.42	0.487	21.52
1400	0.252	0.535	26.12	0.629	35.52	0.491	21.72
1405	0.251	0.535	26.22	0.62	34.72	0.489	21.62
1410	0.252	0.538	26.42	0.626	35.22	0.498	22.42
1415	0.251	0.534	26.12	0.629	35.62	0.491	21.82
1420	0.255	0.535	25.82	0.63	35.32	0.49	21.32
1425	0.251	0.538	26.52	0.632	35.92	0.498	22.52
1430	0.251	0.54	26.72	0.63	35.72	0.494	22.12
1435	0.255	0.536	25.92	0.626	34.92	0.498	22.12
1440	0.253	0.544	26.92	0.631	35.62	0.502	22.72
1445	0.253	0.544	26.92	0.633	35.82	0.498	22.32
1450	0.253	0.545	27.02	0.634	35.92	0.504	22.92
1455	0.254	0.546	27.02	0.639	36.32	0.504	22.82
1460	0.253	0.542	26.72	0.638	36.32	0.502	22.72
1465	0.254	0.546	27.02	0.635	35.92	0.504	22.82
1470	0.252	0.546	27.22	0.633	35.92	0.507	23.32
1475	0.253	0.549	27.42	0.633	35.82	0.503	22.82
1480	0.253	0.545	27.02	0.633	35.82	0.506	23.12
1485	0.257	0.545	26.62	0.636	35.72	0.505	22.62
1490	0.254	0.545	26.92	0.643	36.72	0.504	22.82
1495	0.252	0.55	27.62	0.642	36.82	0.503	22.92
1500	0.252	0.555	28.12	0.64	36.62	0.505	23.12
1505	0.255	0.547	27.02	0.646	36.92	0.51	23.32
1510	0.255	0.544	26.72	0.648	37.12	0.508	23.12
1515	0.255	0.551	27.42	0.642	36.52	0.51	23.32
1520	0.256	0.543	26.52	0.646	36.82	0.512	23.42
1525	0.255	0.551	27.42	0.648	37.12	0.514	23.72
1530	0.253	0.551	27.62	0.649	37.42	0.517	24.22
1535	0.257	0.551	27.22	0.651	37.22	0.514	23.52
1540	0.26	0.553	27.12	0.648	36.62	0.516	23.42
1545	0.256	0.547	26.92	0.654	37.62	0.514	23.62
1550	0.257	0.553	27.42	0.652	37.32	0.516	23.72
1555	0.257	0.55	27.12	0.646	36.72	0.518	23.92
1560	0.259	0.555	27.42	0.648	36.72	0.517	23.62
1565	0.255	0.556	27.92	0.651	37.42	0.522	24.52
1570	0.257	0.553	27.42	0.647	36.82	0.512	23.32
1575	0.257	0.557	27.82	0.66	38.12	0.521	24.22
1580	0.258	0.552	27.22	0.655	37.52	0.519	23.92
1585	0.255	0.556	27.92	0.653	37.62	0.52	24.32
1590	0.254	0.556	28.02	0.655	37.92	0.519	24.32
1595	0.258	0.557	27.72	0.655	37.52	0.524	24.42
1600	0.257	0.555	27.62	0.659	38.02	0.525	24.62
1605	0.256	0.557	27.92	0.654	37.62	0.522	24.42
1610	0.258	0.561	28.12	0.66	38.02	0.524	24.42
1615	0.257	0.558	27.92	0.653	37.42	0.525	24.62
1620	0.258	0.561	28.12	0.661	38.12	0.527	24.72
1625	0.259	0.558	27.72	0.657	37.62	0.525	24.42
1630	0.258	0.558	27.82	0.664	38.42	0.532	25.22
1635	0.256	0.566	28.82	0.663	38.52	0.535	25.72
1640	0.258	0.554	27.42	0.67	39.02	0.529	24.92
1645	0.256	0.563	28.52	0.658	38.02	0.526	24.82
1650	0.258	0.558	27.82	0.664	38.42	0.529	24.92
1655	0.257	0.564	28.52	0.66	38.12	0.528	24.92
1660	0.256	0.559	28.12	0.665	38.72	0.534	25.62
1665	0.259	0.564	28.32	0.665	38.42	0.531	25.02
1670	0.259	0.56	27.92	0.667	38.62	0.534	25.32
1675	0.259	0.563	28.22	0.664	38.32	0.535	25.42
1680	0.256	0.565	28.72	0.667	38.92	0.532	25.42
1685	0.258	0.565	28.52	0.662	38.22	0.534	25.42
1690	0.259	0.563	28.22	0.668	38.72	0.541	26.02
1695	0.256	0.568	29.02	0.67	39.22	0.543	26.52
1700	0.261	0.565	28.22	0.668	38.52	0.542	25.92
1705	0.259	0.57	28.92	0.672	39.12	0.539	25.82
1710	0.258	0.564	28.42	0.676	39.62	0.535	25.52
1715	0.262	0.566	28.22	0.666	38.22	0.54	25.62
1720	0.257	0.567	28.82	0.669	39.02	0.542	26.32
1725	0.26	0.566	28.42	0.669	38.72	0.543	26.12
1730	0.26	0.568	28.62	0.673	39.12	0.549	26.72
1735	0.262	0.569	28.52	0.672	38.82	0.538	25.42
1740	0.261	0.567	28.42	0.695	41.22	0.543	26.02
1745	0.258	0.568	28.82	0.671	39.12	0.544	26.42
1750	0.259	0.567	28.62	0.671	39.02	0.543	26.22
1755	0.26	0.572	29.02	0.674	39.22	0.544	26.22
1760	0.26	0.564	28.22	0.667	38.52	0.544	26.22
1765	0.257	0.571	29.22	0.673	39.42	0.548	26.92
1770	0.262	0.574	29.02	0.674	39.02	0.55	26.62
1775	0.263	0.569	28.42	0.679	39.42	0.551	26.62
1780	0.26	0.573	29.12	0.681	39.92	0.548	26.62
1785	0.259	0.571	29.02	0.68	39.92	0.549	26.82
1790	0.261	0.573	29.02	0.677	39.42	0.549	26.62
1795	0.261	0.569	28.62	0.678	39.52	0.554	27.12
1800	0.255	0.576	29.92	0.678	40.12	0.552	27.52

## Sheet: result
KLP-12(M) + microtubule (MT)
MT (nM)	100	300	1000	3000	10000
ATPase rate ( /s), 1st	0.0058	0.0084	0.0258	0.063	0.0775
ATPase rate ( /s), 2nd	0.0053	0.0241	0.0608	0.1262	0.1408
ATPase rate ( /s), 3rd	0.0063	0.0229	0.0251	0.0906	0.0994
mean	0.0058	0.0184667	0.0372333	0.0932667	0.1059
SD	0.0005	0.00873861	0.0204123	0.0316843	0.0321467
