# Supplementary material for: Structural model of microtubule dynamics inhibition by kinesin-4 from the crystal structure of KLP-12 –tubulin complex
Source: eLife. 2022 Sep 6;11:e77877. doi: 10.7554/eLife.77877 (PMC9451533; doi:10.7554/eLife.77877)
Supplement: Figure 3—source data 2. [file elife-77877-fig3-data2.xlsx]

## Sheet: Pi standard
Pi Conc. (μM)	OD360
0	0
25	0.2871
50	0.5441
100	1.0095

## Sheet: 100Tu_Mo
Time (sec)	BG_OD360	1st_OD360	1st_ΔPi con. (μM)	2nd_OD360	2nd_ΔPi con. (μM)	3rd_OD360	3rd_ΔPi con. (μM)
	0.041	0.019		0.012		0.017
5	0.046	0.024	-4.38	0.025	-4.28	0.03	-3.78
10	0.051	0.031	-4.18	0.038	-3.48	0.045	-2.78
15	0.058	0.041	-3.88	0.049	-3.08	0.054	-2.58
20	0.065	0.05	-3.68	0.061	-2.58	0.068	-1.88
25	0.075	0.058	-3.88	0.073	-2.38	0.079	-1.78
30	0.082	0.065	-3.88	0.085	-1.88	0.09	-1.38
35	0.088	0.078	-3.18	0.093	-1.68	0.101	-0.88
40	0.101	0.089	-3.38	0.106	-1.68	0.111	-1.18
45	0.107	0.096	-3.28	0.115	-1.38	0.121	-0.78
50	0.115	0.106	-3.08	0.127	-0.98	0.132	-0.48
55	0.124	0.116	-2.98	0.148	0.22	0.141	-0.48
60	0.131	0.125	-2.78	0.146	-0.68	0.151	-0.18
65	0.14	0.135	-2.68	0.158	-0.38	0.158	-0.38
70	0.146	0.141	-2.68	0.165	-0.28	0.168	0.02
75	0.156	0.15	-2.78	0.174	-0.38	0.174	-0.38
80	0.163	0.156	-2.88	0.183	-0.18	0.181	-0.38
85	0.174	0.164	-3.18	0.191	-0.48	0.192	-0.38
90	0.179	0.174	-2.68	0.198	-0.28	0.198	-0.28
95	0.183	0.178	-2.68	0.206	0.12	0.204	-0.08
100	0.191	0.187	-2.58	0.213	0.02	0.211	-0.18
105	0.197	0.195	-2.38	0.219	0.02	0.216	-0.28
110	0.204	0.201	-2.48	0.226	0.02	0.223	-0.28
115	0.208	0.206	-2.38	0.232	0.22	0.228	-0.18
120	0.217	0.211	-2.78	0.238	-0.08	0.233	-0.58
125	0.222	0.218	-2.58	0.245	0.12	0.238	-0.58
130	0.228	0.222	-2.78	0.25	0.02	0.243	-0.68
135	0.235	0.23	-2.68	0.253	-0.38	0.247	-0.98
140	0.239	0.234	-2.68	0.257	-0.38	0.252	-0.88
145	0.245	0.238	-2.88	0.262	-0.48	0.257	-0.98
150	0.247	0.244	-2.48	0.266	-0.28	0.26	-0.88
155	0.254	0.246	-2.98	0.271	-0.48	0.263	-1.28
160	0.258	0.251	-2.88	0.276	-0.38	0.265	-1.48
165	0.267	0.256	-3.28	0.278	-1.08	0.267	-2.18
170	0.269	0.259	-3.18	0.282	-0.88	0.272	-1.88
175	0.273	0.265	-2.98	0.285	-0.98	0.275	-1.98
180	0.277	0.268	-3.08	0.288	-1.08	0.277	-2.18
185	0.282	0.271	-3.28	0.293	-1.08	0.28	-2.38
190	0.286	0.276	-3.18	0.296	-1.18	0.282	-2.58
195	0.291	0.279	-3.38	0.301	-1.18	0.285	-2.78
200	0.293	0.283	-3.18	0.301	-1.38	0.285	-2.98
205	0.296	0.289	-2.88	0.304	-1.38	0.288	-2.98
210	0.302	0.293	-3.08	0.307	-1.68	0.292	-3.18
215	0.309	0.295	-3.58	0.308	-2.28	0.293	-3.78
220	0.31	0.299	-3.28	0.312	-1.98	0.292	-3.98
225	0.311	0.305	-2.78	0.315	-1.78	0.294	-3.88
230	0.316	0.305	-3.28	0.316	-2.18	0.298	-3.98
235	0.32	0.313	-2.88	0.319	-2.28	0.3	-4.18
240	0.322	0.316	-2.78	0.319	-2.48	0.299	-4.48
245	0.326	0.318	-2.98	0.324	-2.38	0.3	-4.78
250	0.327	0.321	-2.78	0.322	-2.68	0.302	-4.68
255	0.329	0.324	-2.68	0.325	-2.58	0.304	-4.68
260	0.332	0.326	-2.78	0.327	-2.68	0.305	-4.88
265	0.333	0.332	-2.28	0.329	-2.58	0.306	-4.88
270	0.338	0.333	-2.68	0.331	-2.88	0.309	-5.08
275	0.338	0.337	-2.28	0.332	-2.78	0.307	-5.28
280	0.34	0.335	-2.68	0.332	-2.98	0.308	-5.38
285	0.344	0.34	-2.58	0.331	-3.48	0.312	-5.38
290	0.345	0.341	-2.58	0.332	-3.48	0.311	-5.58
295	0.35	0.346	-2.58	0.336	-3.58	0.311	-6.08
300	0.35	0.347	-2.48	0.336	-3.58	0.314	-5.78
305	0.35	0.353	-1.88	0.339	-3.28	0.313	-5.88
310	0.352	0.351	-2.28	0.34	-3.38	0.315	-5.88
315	0.356	0.354	-2.38	0.34	-3.78	0.312	-6.58
320	0.359	0.355	-2.58	0.343	-3.78	0.316	-6.48
325	0.36	0.356	-2.58	0.343	-3.88	0.317	-6.48
330	0.361	0.357	-2.58	0.342	-4.08	0.317	-6.58
335	0.365	0.363	-2.38	0.346	-4.08	0.316	-7.08
340	0.365	0.361	-2.58	0.345	-4.18	0.316	-7.08
345	0.367	-0.806	-119.48	0.344	-4.48	0.315	-7.38
350	0.367	-0.806	-119.48	-0.816	-120.48	0.316	-7.28
355	0.369	-0.805	-119.58	-0.815	-120.58	-0.828	-121.88
360	0.371	0.317	-7.58	0.313	-7.98	-0.828	-122.08
365	0.371	0.317	-7.58	0.311	-8.18	-0.815	-120.78
370	0.377	0.318	-8.08	0.312	-8.68	0.299	-9.98
375	0.379	0.32	-8.08	0.312	-8.88	0.298	-10.28
380	0.377	0.32	-7.88	0.314	-8.48	0.299	-9.98
385	0.377	0.321	-7.78	0.312	-8.68	0.301	-9.78
390	0.381	0.324	-7.88	0.315	-8.78	0.301	-10.18
395	0.382	0.322	-8.18	0.314	-8.98	0.299	-10.48
400	0.381	0.325	-7.78	0.313	-8.98	0.299	-10.38
405	0.384	0.324	-8.18	0.316	-8.98	0.304	-10.18
410	0.386	0.324	-8.38	0.317	-9.08	0.304	-10.38
415	0.385	0.324	-8.28	0.316	-9.08	0.303	-10.38
420	0.387	0.326	-8.28	0.318	-9.08	0.301	-10.78
425	0.39	0.327	-8.48	0.318	-9.38	0.304	-10.78
430	0.391	0.325	-8.78	0.318	-9.48	0.302	-11.08
435	0.393	0.326	-8.88	0.32	-9.48	0.304	-11.08
440	0.39	0.326	-8.58	0.32	-9.18	0.304	-10.78
445	0.394	0.328	-8.78	0.321	-9.48	0.304	-11.18
450	0.393	0.328	-8.68	0.322	-9.28	0.303	-11.18
455	0.395	0.326	-9.08	0.32	-9.68	0.302	-11.48
460	0.391	0.327	-8.58	0.322	-9.08	0.303	-10.98
465	0.394	0.325	-9.08	0.321	-9.48	0.304	-11.18
470	0.397	0.326	-9.28	0.323	-9.58	0.305	-11.38
475	0.396	0.326	-9.18	0.321	-9.68	0.303	-11.48
480	0.394	0.326	-8.98	0.32	-9.58	0.304	-11.18
485	0.395	0.326	-9.08	0.322	-9.48	0.302	-11.48
490	0.395	0.324	-9.28	0.321	-9.58	0.301	-11.58
495	0.393	0.327	-8.78	0.322	-9.28	0.301	-11.38
500	0.391	0.327	-8.58	0.321	-9.18	0.302	-11.08
505	0.395	0.328	-8.88	0.321	-9.58	0.302	-11.48
510	0.391	0.326	-8.68	0.319	-9.38	0.301	-11.18
515	0.388	0.327	-8.28	0.321	-8.88	0.3	-10.98
520	0.39	0.327	-8.48	0.321	-9.08	0.301	-11.08
525	0.387	0.328	-8.08	0.318	-9.08	0.301	-10.78
530	0.386	0.328	-7.98	0.319	-8.88	0.302	-10.58
535	0.383	0.328	-7.68	0.319	-8.58	0.3	-10.48
540	0.381	0.327	-7.58	0.321	-8.18	0.303	-9.98
545	0.38	0.326	-7.58	0.32	-8.18	0.303	-9.88
550	0.374	0.328	-6.78	0.318	-7.78	0.302	-9.38
555	0.372	0.328	-6.58	0.318	-7.58	0.302	-9.18
560	0.371	0.329	-6.38	0.319	-7.38	0.302	-9.08
565	0.371	0.328	-6.48	0.319	-7.38	0.302	-9.08
570	0.371	0.329	-6.38	0.321	-7.18	0.304	-8.88
575	0.368	0.328	-6.18	0.318	-7.18	0.302	-8.78
580	0.367	0.331	-5.78	0.32	-6.88	0.301	-8.78
585	0.363	0.329	-5.58	0.32	-6.48	0.302	-8.28
590	0.366	0.34	-4.78	0.321	-6.68	0.303	-8.48
595	0.362	0.33	-5.38	0.319	-6.48	0.304	-7.98
600	0.36	0.329	-5.28	0.319	-6.28	0.303	-7.88
605	0.363	0.33	-5.48	0.319	-6.58	0.301	-8.38
610	0.361	0.333	-4.98	0.319	-6.38	0.304	-7.88
615	0.361	0.332	-5.08	0.317	-6.58	0.303	-7.98
620	0.358	0.333	-4.68	0.318	-6.18	0.302	-7.78
625	0.356	0.331	-4.68	0.319	-5.88	0.303	-7.48
630	0.358	0.331	-4.88	0.318	-6.18	0.303	-7.68
635	0.359	0.333	-4.78	0.319	-6.18	0.304	-7.68
640	0.356	0.336	-4.18	0.317	-6.08	0.304	-7.38
645	0.357	0.335	-4.38	0.319	-5.98	0.303	-7.58
650	0.357	0.331	-4.78	0.318	-6.08	0.303	-7.58
655	0.355	0.337	-3.98	0.321	-5.58	0.303	-7.38
660	0.356	0.334	-4.38	0.318	-5.98	0.305	-7.28
665	0.355	0.336	-4.08	0.317	-5.98	0.302	-7.48
670	0.355	0.335	-4.18	0.316	-6.08	0.304	-7.28
675	0.353	0.337	-3.78	0.318	-5.68	0.303	-7.18
680	0.352	0.335	-3.88	0.319	-5.48	0.303	-7.08
685	0.355	0.335	-4.18	0.318	-5.88	0.305	-7.18
690	0.351	0.336	-3.68	0.318	-5.48	0.301	-7.18
695	0.352	0.336	-3.78	0.319	-5.48	0.304	-6.98
700	0.355	0.337	-3.98	0.319	-5.78	0.304	-7.28
705	0.353	0.336	-3.88	0.317	-5.78	0.302	-7.28
710	0.352	0.337	-3.68	0.317	-5.68	0.301	-7.28
715	0.35	0.337	-3.48	0.318	-5.38	0.303	-6.88
720	0.349	0.34	-3.08	0.317	-5.38	0.302	-6.88
725	0.351	0.339	-3.38	0.318	-5.48	0.302	-7.08
730	0.35	0.34	-3.18	0.319	-5.28	0.303	-6.88
735	0.352	0.341	-3.28	0.321	-5.28	0.304	-6.98
740	0.353	0.341	-3.38	0.318	-5.68	0.307	-6.78
745	0.352	0.341	-3.28	0.319	-5.48	0.306	-6.78
750	0.352	0.34	-3.38	0.319	-5.48	0.304	-6.98
755	0.351	0.339	-3.38	0.321	-5.18	0.302	-7.08
760	0.351	0.34	-3.28	0.319	-5.38	0.305	-6.78
765	0.351	0.34	-3.28	0.319	-5.38	0.305	-6.78
770	0.35	0.343	-2.88	0.322	-4.98	0.306	-6.58
775	0.351	0.342	-3.08	0.319	-5.38	0.306	-6.68
780	0.352	0.341	-3.28	0.322	-5.18	0.304	-6.98
785	0.352	0.341	-3.28	0.322	-5.18	0.307	-6.68
790	0.352	0.342	-3.18	0.323	-5.08	0.304	-6.98
795	0.352	0.343	-3.08	0.324	-4.98	0.307	-6.68
800	0.352	0.343	-3.08	0.325	-4.88	0.307	-6.68
805	0.353	0.343	-3.18	0.323	-5.18	0.309	-6.58
810	0.353	0.345	-2.98	0.323	-5.18	0.308	-6.68
815	0.353	0.343	-3.18	0.322	-5.28	0.307	-6.78
820	0.352	0.343	-3.08	0.323	-5.08	0.307	-6.68
825	0.352	0.341	-3.28	0.325	-4.88	0.308	-6.58
830	0.353	0.344	-3.08	0.324	-5.08	0.309	-6.58
835	0.351	0.346	-2.68	0.328	-4.48	0.31	-6.28
840	0.354	0.344	-3.18	0.326	-4.98	0.31	-6.58
845	0.352	0.344	-2.98	0.328	-4.58	0.309	-6.48
850	0.35	0.344	-2.78	0.327	-4.48	0.309	-6.28
855	0.354	0.347	-2.88	0.325	-5.08	0.311	-6.48
860	0.355	0.345	-3.18	0.327	-4.98	0.309	-6.78
865	0.35	0.348	-2.38	0.327	-4.48	0.31	-6.18
870	0.353	0.347	-2.78	0.328	-4.68	0.312	-6.28
875	0.35	0.349	-2.28	0.329	-4.28	0.312	-5.98
880	0.351	0.348	-2.48	0.327	-4.58	0.311	-6.18
885	0.353	0.35	-2.48	0.329	-4.58	0.313	-6.18
890	0.355	0.349	-2.78	0.327	-4.98	0.311	-6.58
895	0.351	0.349	-2.38	0.326	-4.68	0.313	-5.98
900	0.353	0.35	-2.48	0.328	-4.68	0.313	-6.18
905	0.354	0.351	-2.48	0.328	-4.78	0.314	-6.18
910	0.352	0.351	-2.28	0.329	-4.48	0.312	-6.18
915	0.352	0.352	-2.18	0.329	-4.48	0.314	-5.98
920	0.352	0.352	-2.18	0.33	-4.38	0.315	-5.88
925	0.355	0.354	-2.28	0.327	-4.98	0.314	-6.28
930	0.352	0.351	-2.28	0.329	-4.48	0.313	-6.08
935	0.351	0.354	-1.88	0.331	-4.18	0.315	-5.78
940	0.353	0.354	-2.08	0.331	-4.38	0.315	-5.98
945	0.356	0.354	-2.38	0.33	-4.78	0.317	-6.08
950	0.351	0.356	-1.68	0.331	-4.18	0.317	-5.58
955	0.356	0.353	-2.48	0.332	-4.58	0.313	-6.48
960	0.356	0.355	-2.28	0.333	-4.48	0.318	-5.98
965	0.35	0.357	-1.48	0.332	-3.98	0.317	-5.48
970	0.35	0.356	-1.58	0.331	-4.08	0.316	-5.58
975	0.353	0.356	-1.88	0.332	-4.28	0.317	-5.78
980	0.35	0.355	-1.68	0.33	-4.18	0.32	-5.18
985	0.354	0.357	-1.88	0.332	-4.38	0.316	-5.98
990	0.35	0.355	-1.68	0.333	-3.88	0.319	-5.28
995	0.353	0.359	-1.58	0.334	-4.08	0.317	-5.78
1000	0.351	0.358	-1.48	0.335	-3.78	0.318	-5.48
1005	0.354	0.359	-1.68	0.333	-4.28	0.319	-5.68
1010	0.354	0.359	-1.68	0.333	-4.28	0.318	-5.78
1015	0.353	0.357	-1.78	0.333	-4.18	0.317	-5.78
1020	0.351	0.359	-1.38	0.334	-3.88	0.319	-5.38
1025	0.354	0.358	-1.78	0.332	-4.38	0.321	-5.48
1030	0.355	0.357	-1.98	0.334	-4.28	0.322	-5.48
1035	0.351	0.36	-1.28	0.334	-3.88	0.32	-5.28
1040	0.353	0.361	-1.38	0.332	-4.28	0.319	-5.58
1045	0.354	0.36	-1.58	0.334	-4.18	0.322	-5.38
1050	0.353	0.362	-1.28	0.335	-3.98	0.321	-5.38
1055	0.354	0.36	-1.58	0.334	-4.18	0.32	-5.58
1060	0.353	0.359	-1.58	0.334	-4.08	0.322	-5.28
1065	0.352	0.358	-1.58	0.336	-3.78	0.322	-5.18
1070	0.354	0.358	-1.78	0.334	-4.18	0.322	-5.38
1075	0.354	0.359	-1.68	0.336	-3.98	0.322	-5.38
1080	0.356	0.361	-1.68	0.335	-4.28	0.319	-5.88
1085	0.353	0.36	-1.48	0.335	-3.98	0.321	-5.38
1090	0.355	0.363	-1.38	0.336	-4.08	0.322	-5.48
1095	0.352	0.362	-1.18	0.337	-3.68	0.323	-5.08
1100	0.354	0.365	-1.08	0.337	-3.88	0.323	-5.28
1105	0.353	0.365	-0.98	0.334	-4.08	0.324	-5.08
1110	0.355	0.362	-1.48	0.337	-3.98	0.325	-5.18
1115	0.353	0.364	-1.08	0.338	-3.68	0.322	-5.28
1120	0.354	0.36	-1.58	0.338	-3.78	0.324	-5.18
1125	0.355	0.363	-1.38	0.338	-3.88	0.322	-5.48
1130	0.354	0.362	-1.38	0.339	-3.68	0.323	-5.28
1135	0.353	0.361	-1.38	0.337	-3.78	0.322	-5.28
1140	0.354	0.363	-1.28	0.341	-3.48	0.321	-5.48
1145	0.353	0.364	-1.08	0.338	-3.68	0.324	-5.08
1150	0.353	0.364	-1.08	0.339	-3.58	0.323	-5.18
1155	0.356	0.365	-1.28	0.341	-3.68	0.324	-5.38
1160	0.354	0.364	-1.18	0.341	-3.48	0.324	-5.18
1165	0.355	0.363	-1.38	0.34	-3.68	0.323	-5.38
1170	0.354	0.364	-1.18	0.342	-3.38	0.324	-5.18
1175	0.355	0.364	-1.28	0.338	-3.88	0.324	-5.28
1180	0.351	0.365	-0.78	0.341	-3.18	0.322	-5.08
1185	0.352	0.365	-0.88	0.339	-3.48	0.326	-4.78
1190	0.356	0.366	-1.18	0.339	-3.88	0.324	-5.38
1195	0.355	0.368	-0.88	0.34	-3.68	0.324	-5.28
1200	0.356	0.367	-1.08	0.339	-3.88	0.323	-5.48
1205	0.355	0.366	-1.08	0.342	-3.48	0.326	-5.08
1210	0.357	0.366	-1.28	0.339	-3.98	0.325	-5.38
1215	0.352	0.368	-0.58	0.342	-3.18	0.328	-4.58
1220	0.356	0.367	-1.08	0.34	-3.78	0.325	-5.28
1225	0.354	0.369	-0.68	0.343	-3.28	0.326	-4.98
1230	0.357	0.368	-1.08	0.342	-3.68	0.326	-5.28
1235	0.355	0.37	-0.68	0.345	-3.18	0.327	-4.98
1240	0.354	0.372	-0.38	0.342	-3.38	0.328	-4.78
1245	0.353	0.367	-0.78	0.342	-3.28	0.327	-4.78
1250	0.355	0.372	-0.48	0.343	-3.38	0.328	-4.88
1255	0.354	0.369	-0.68	0.342	-3.38	0.329	-4.68
1260	0.353	0.368	-0.68	0.342	-3.28	0.33	-4.48
1265	0.356	0.372	-0.58	0.343	-3.48	0.326	-5.18
1270	0.354	0.373	-0.28	0.342	-3.38	0.326	-4.98
1275	0.354	0.372	-0.38	0.345	-3.08	0.328	-4.78
1280	0.357	0.371	-0.78	0.341	-3.78	0.328	-5.08
1285	0.356	0.371	-0.68	0.344	-3.38	0.33	-4.78
1290	0.354	0.372	-0.38	0.343	-3.28	0.329	-4.68
1295	0.355	0.372	-0.48	0.344	-3.28	0.326	-5.08
1300	0.357	0.372	-0.68	0.343	-3.58	0.329	-4.98
1305	0.355	0.373	-0.38	0.344	-3.28	0.331	-4.58
1310	0.357	0.37	-0.88	0.346	-3.28	0.329	-4.98
1315	0.356	0.373	-0.48	0.346	-3.18	0.33	-4.78
1320	0.356	0.374	-0.38	0.346	-3.18	0.328	-4.98
1325	0.355	0.373	-0.38	0.344	-3.28	0.33	-4.68
1330	0.355	0.373	-0.38	0.344	-3.28	0.329	-4.78
1335	0.357	0.371	-0.78	0.345	-3.38	0.329	-4.98
1340	0.353	0.375	0.02	0.345	-2.98	0.329	-4.58
1345	0.356	0.373	-0.48	0.345	-3.28	0.331	-4.68
1350	0.357	0.374	-0.48	0.345	-3.38	0.329	-4.98
1355	0.354	0.374	-0.18	0.346	-2.98	0.329	-4.68
1360	0.355	0.376	-0.08	0.344	-3.28	0.328	-4.88
1365	0.358	0.375	-0.48	0.346	-3.38	0.33	-4.98
1370	0.352	0.373	-0.08	0.346	-2.78	0.33	-4.38
1375	0.354	0.378	0.22	0.348	-2.78	0.333	-4.28
1380	0.357	0.376	-0.28	0.347	-3.18	0.331	-4.78
1385	0.356	0.376	-0.18	0.346	-3.18	0.332	-4.58
1390	0.354	0.374	-0.18	0.347	-2.88	0.331	-4.48
1395	0.354	0.376	0.02	0.348	-2.78	0.333	-4.28
1400	0.357	0.376	-0.28	0.344	-3.48	0.332	-4.68
1405	0.355	0.377	0.02	0.348	-2.88	0.331	-4.58
1410	0.357	0.38	0.12	0.348	-3.08	0.334	-4.48
1415	0.357	0.377	-0.18	0.347	-3.18	0.334	-4.48
1420	0.356	0.378	0.02	0.348	-2.98	0.333	-4.48
1425	0.355	0.377	0.02	0.348	-2.88	0.33	-4.68
1430	0.356	0.381	0.32	0.348	-2.98	0.335	-4.28
1435	0.355	0.377	0.02	0.348	-2.88	0.333	-4.38
1440	0.356	0.379	0.12	0.35	-2.78	0.334	-4.38
1445	0.354	0.38	0.42	0.348	-2.78	0.332	-4.38
1450	0.356	0.379	0.12	0.349	-2.88	0.333	-4.48
1455	0.356	0.379	0.12	0.349	-2.88	0.333	-4.48
1460	0.357	0.377	-0.18	0.347	-3.18	0.334	-4.48
1465	0.356	0.377	-0.08	0.351	-2.68	0.336	-4.18
1470	0.356	0.381	0.32	0.348	-2.98	0.334	-4.38
1475	0.355	0.382	0.52	0.35	-2.68	0.335	-4.18
1480	0.356	0.381	0.32	0.349	-2.88	0.334	-4.38
1485	0.356	0.381	0.32	0.35	-2.78	0.333	-4.48
1490	0.355	0.38	0.32	0.349	-2.78	0.333	-4.38
1495	0.358	0.379	-0.08	0.352	-2.78	0.338	-4.18
1500	0.357	0.381	0.22	0.349	-2.98	0.337	-4.18
1505	0.358	0.382	0.22	0.349	-3.08	0.335	-4.48
1510	0.357	0.383	0.42	0.353	-2.58	0.337	-4.18
1515	0.352	0.38	0.62	0.351	-2.28	0.337	-3.68
1520	0.357	0.381	0.22	0.35	-2.88	0.337	-4.18
1525	0.355	0.38	0.32	0.351	-2.58	0.336	-4.08
1530	0.355	0.383	0.62	0.351	-2.58	0.335	-4.18
1535	0.357	0.386	0.72	0.35	-2.88	0.339	-3.98
1540	0.355	0.381	0.42	0.351	-2.58	0.338	-3.88
1545	0.356	0.383	0.52	0.351	-2.68	0.336	-4.18
1550	0.357	0.382	0.32	0.349	-2.98	0.337	-4.18
1555	0.359	0.384	0.32	0.35	-3.08	0.336	-4.48
1560	0.356	0.385	0.72	0.354	-2.38	0.337	-4.08
1565	0.355	0.382	0.52	0.354	-2.28	0.337	-3.98
1570	0.356	0.385	0.72	0.353	-2.48	0.338	-3.98
1575	0.354	0.382	0.62	0.353	-2.28	0.336	-3.98
1580	0.358	0.383	0.32	0.353	-2.68	0.338	-4.18
1585	0.358	0.382	0.22	0.351	-2.88	0.339	-4.08
1590	0.357	0.383	0.42	0.353	-2.58	0.339	-3.98
1595	0.356	0.386	0.82	0.352	-2.58	0.336	-4.18
1600	0.357	0.384	0.52	0.354	-2.48	0.337	-4.18
1605	0.353	0.384	0.92	0.355	-1.98	0.34	-3.48
1610	0.356	0.384	0.62	0.353	-2.48	0.342	-3.58
1615	0.358	0.386	0.62	0.354	-2.58	0.338	-4.18
1620	0.358	0.386	0.62	0.354	-2.58	0.337	-4.28
1625	0.353	0.384	0.92	0.353	-2.18	0.339	-3.58
1630	0.358	0.384	0.42	0.352	-2.78	0.34	-3.98
1635	0.356	0.385	0.72	0.351	-2.68	0.339	-3.88
1640	0.356	0.386	0.82	0.356	-2.18	0.342	-3.58
1645	0.355	0.387	1.02	0.357	-1.98	0.341	-3.58
1650	0.358	0.388	0.82	0.356	-2.38	0.341	-3.88
1655	0.355	0.387	1.02	0.356	-2.08	0.341	-3.58
1660	0.355	0.39	1.32	0.351	-2.58	0.34	-3.68
1665	0.356	0.389	1.12	0.355	-2.28	0.345	-3.28
1670	0.355	0.389	1.22	0.354	-2.28	0.341	-3.58
1675	0.356	0.389	1.12	0.352	-2.58	0.341	-3.68
1680	0.357	0.389	1.02	0.356	-2.28	0.34	-3.88
1685	0.355	0.386	0.92	0.356	-2.08	0.341	-3.58
1690	0.356	0.39	1.22	0.357	-2.08	0.341	-3.68
1695	0.355	0.389	1.22	0.356	-2.08	0.342	-3.48
1700	0.358	0.39	1.02	0.357	-2.28	0.34	-3.98
1705	0.358	0.391	1.12	0.355	-2.48	0.342	-3.78
1710	0.357	0.391	1.22	0.357	-2.18	0.341	-3.78
1715	0.356	0.391	1.32	0.356	-2.18	0.34	-3.78
1720	0.357	0.388	0.92	0.359	-1.98	0.344	-3.48
1725	0.355	0.392	1.52	0.357	-1.98	0.342	-3.48
1730	0.358	0.392	1.22	0.357	-2.28	0.345	-3.48
1735	0.356	0.389	1.12	0.359	-1.88	0.343	-3.48
1740	0.356	0.39	1.22	0.359	-1.88	0.343	-3.48
1745	0.357	0.392	1.32	0.359	-1.98	0.342	-3.68
1750	0.358	0.391	1.12	0.357	-2.28	0.343	-3.68
1755	0.358	0.388	0.82	0.359	-2.08	0.344	-3.58
1760	0.356	0.392	1.42	0.359	-1.88	0.345	-3.28
1765	0.357	0.395	1.62	0.36	-1.88	0.345	-3.38
1770	0.36	0.391	0.92	0.358	-2.38	0.342	-3.98
1775	0.358	0.39	1.02	0.359	-2.08	0.344	-3.58
1780	0.358	0.391	1.12	0.358	-2.18	0.343	-3.68
1785	0.357	0.39	1.12	0.36	-1.88	0.345	-3.38
1790	0.358	0.392	1.22	0.361	-1.88	0.346	-3.38
1795	0.359	0.392	1.12	0.359	-2.18	0.345	-3.58
1800	0.355	0.391	1.42	0.359	-1.78	0.342	-3.48

## Sheet: 300Tu_Mo
Time (sec)	BG_OD360	1st_OD360	1st_ΔPi con. (μM)	2nd_OD360	2nd_ΔPi con. (μM)	3rd_OD360	3rd_ΔPi con. (μM)
	0.023	0.03		0.019		0.011
5	0.026	0.044	-0.38	0.028	-1.98	0.023	-2.48
10	0.033	0.055	0.02	0.035	-1.98	0.032	-2.28
15	0.038	0.065	0.52	0.043	-1.68	0.042	-1.78
20	0.045	0.072	0.52	0.051	-1.58	0.051	-1.58
25	0.053	0.083	0.82	0.058	-1.68	0.064	-1.08
30	0.061	0.09	0.72	0.067	-1.58	0.072	-1.08
35	0.069	0.103	1.22	0.074	-1.68	0.083	-0.78
40	0.077	0.111	1.22	0.083	-1.58	0.092	-0.68
45	0.085	0.119	1.22	0.094	-1.28	0.102	-0.48
50	0.096	0.126	0.82	0.102	-1.58	0.112	-0.58
55	0.102	0.135	1.12	0.11	-1.38	0.122	-0.18
60	0.111	0.145	1.22	0.119	-1.38	0.132	-0.08
65	0.12	0.152	1.02	0.125	-1.68	0.136	-0.58
70	0.126	0.159	1.12	0.135	-1.28	0.146	-0.18
75	0.134	0.169	1.32	0.139	-1.68	0.152	-0.38
80	0.142	0.178	1.42	0.147	-1.68	0.158	-0.58
85	0.149	0.186	1.52	0.154	-1.68	0.164	-0.68
90	0.154	0.192	1.62	0.16	-1.58	0.172	-0.38
95	0.162	0.197	1.32	0.168	-1.58	0.177	-0.68
100	0.17	0.202	1.02	0.173	-1.88	0.186	-0.58
105	0.177	0.209	1.02	0.178	-2.08	0.19	-0.88
110	0.184	0.215	0.92	0.183	-2.28	0.196	-0.98
115	0.188	0.221	1.12	0.186	-2.38	0.202	-0.78
120	0.194	0.228	1.22	0.195	-2.08	0.208	-0.78
125	0.2	0.231	0.92	0.197	-2.48	0.215	-0.68
130	0.204	0.237	1.12	0.205	-2.08	0.218	-0.78
135	0.212	0.244	1.02	0.206	-2.78	0.22	-1.38
140	0.217	0.247	0.82	0.21	-2.88	0.226	-1.28
145	0.221	0.252	0.92	0.216	-2.68	0.232	-1.08
150	0.227	0.257	0.82	0.22	-2.88	0.237	-1.18
155	0.232	0.261	0.72	0.224	-2.98	0.24	-1.38
160	0.237	0.267	0.82	0.23	-2.88	0.248	-1.08
165	0.241	0.272	0.92	0.232	-3.08	0.249	-1.38
170	0.247	0.275	0.62	0.238	-3.08	0.252	-1.68
175	0.251	0.277	0.42	0.244	-2.88	0.255	-1.78
180	0.255	0.281	0.42	0.246	-3.08	0.261	-1.58
185	0.261	0.286	0.32	0.25	-3.28	0.264	-1.88
190	0.267	0.291	0.22	0.258	-3.08	0.266	-2.28
195	0.271	0.292	-0.08	0.26	-3.28	0.269	-2.38
200	0.275	0.296	-0.08	0.265	-3.18	0.272	-2.48
205	0.279	0.298	-0.28	0.27	-3.08	0.274	-2.68
210	0.284	0.302	-0.38	0.274	-3.18	0.278	-2.78
215	0.287	0.308	-0.08	0.281	-2.78	0.28	-2.88
220	0.295	0.308	-0.88	0.284	-3.28	0.282	-3.48
225	0.299	0.312	-0.88	0.289	-3.18	0.285	-3.58
230	0.304	0.317	-0.88	0.291	-3.48	0.287	-3.88
235	0.305	0.317	-0.98	0.299	-2.78	0.291	-3.58
240	0.312	0.32	-1.38	0.301	-3.28	0.295	-3.88
245	0.315	0.327	-0.98	0.305	-3.18	0.293	-4.38
250	0.318	0.326	-1.38	0.308	-3.18	0.297	-4.28
255	0.32	0.331	-1.08	0.313	-2.88	0.299	-4.28
260	0.325	0.336	-1.08	0.316	-3.08	0.303	-4.38
265	0.33	0.335	-1.68	0.317	-3.48	0.304	-4.78
270	0.333	0.338	-1.68	0.323	-3.18	0.307	-4.78
275	0.335	0.34	-1.68	0.323	-3.38	0.309	-4.78
280	0.339	0.342	-1.88	0.325	-3.58	0.311	-4.98
285	0.34	0.342	-1.98	0.329	-3.28	0.311	-5.08
290	0.344	0.344	-2.18	0.332	-3.38	0.314	-5.18
295	0.345	0.346	-2.08	0.333	-3.38	0.315	-5.18
300	0.347	0.349	-1.98	0.334	-3.48	0.318	-5.08
305	0.35	0.349	-2.28	0.338	-3.38	0.318	-5.38
310	0.351	0.352	-2.08	0.339	-3.38	0.322	-5.08
315	0.35	0.355	-1.68	0.34	-3.18	0.321	-5.08
320	0.353	0.358	-1.68	0.34	-3.48	0.325	-4.98
325	0.356	0.358	-1.98	0.341	-3.68	0.325	-5.28
330	0.359	0.356	-2.48	0.344	-3.68	0.326	-5.48
335	0.355	0.361	-1.58	0.342	-3.48	0.326	-5.08
340	0.359	0.364	-1.68	0.346	-3.48	0.33	-5.08
345	0.36	-0.801	-118.28	0.346	-3.58	0.328	-5.38
350	0.358	-0.8	-117.98	0.348	-3.18	0.334	-4.58
355	0.36	0.336	-4.58	0.348	-3.38	0.333	-4.88
360	0.363	0.335	-4.98	0.345	-3.98	0.332	-5.28
365	0.362	0.333	-5.08	0.346	-3.78	0.333	-5.08
370	0.36	0.332	-4.98	0.348	-3.38	0.335	-4.68
375	0.361	0.334	-4.88	0.347	-3.58	0.336	-4.68
380	0.362	0.329	-5.48	-0.819	-120.28	0.335	-4.88
385	0.364	0.333	-5.28	-0.817	-120.28	0.336	-4.98
390	0.364	0.332	-5.38	0.309	-7.68	-0.836	-122.18
395	0.362	0.331	-5.28	0.305	-7.88	-0.834	-121.78
400	0.365	0.335	-5.18	0.307	-7.98	0.304	-8.28
405	0.366	0.34	-4.78	0.309	-7.88	0.306	-8.18
410	0.364	0.338	-4.78	0.309	-7.68	0.308	-7.78
415	0.364	0.339	-4.68	0.31	-7.58	0.311	-7.48
420	0.364	0.342	-4.38	0.313	-7.28	0.311	-7.48
425	0.366	0.343	-4.48	0.312	-7.58	0.312	-7.58
430	0.366	0.345	-4.28	0.316	-7.18	0.315	-7.28
435	0.368	0.345	-4.48	0.317	-7.28	0.317	-7.28
440	0.367	0.347	-4.18	0.32	-6.88	0.319	-6.98
445	0.364	0.346	-3.98	0.32	-6.58	0.322	-6.38
450	0.367	0.349	-3.98	0.322	-6.68	0.321	-6.78
455	0.368	0.348	-4.18	0.321	-6.88	0.323	-6.68
460	0.367	0.349	-3.98	0.324	-6.48	0.327	-6.18
465	0.365	0.352	-3.48	0.336	-5.08	0.328	-5.88
470	0.368	0.35	-3.98	0.324	-6.58	0.325	-6.48
475	0.368	0.352	-3.78	0.325	-6.48	0.328	-6.18
480	0.369	0.353	-3.78	0.327	-6.38	0.328	-6.28
485	0.369	0.355	-3.58	0.323	-6.78	0.329	-6.18
490	0.368	0.354	-3.58	0.328	-6.18	0.33	-5.98
495	0.369	0.351	-3.98	0.328	-6.28	0.329	-6.18
500	0.367	0.352	-3.68	0.325	-6.38	0.331	-5.78
505	0.367	0.349	-3.98	0.329	-5.98	0.333	-5.58
510	0.368	0.353	-3.68	0.326	-6.38	0.333	-5.68
515	0.37	0.354	-3.78	0.328	-6.38	0.331	-6.08
520	0.369	0.354	-3.68	0.328	-6.28	0.336	-5.48
525	0.37	0.351	-4.08	0.325	-6.68	0.333	-5.88
530	0.369	0.351	-3.98	0.328	-6.28	0.334	-5.68
535	0.367	0.351	-3.78	0.329	-5.98	0.334	-5.48
540	0.37	0.351	-4.08	0.328	-6.38	0.336	-5.58
545	0.369	0.353	-3.78	0.331	-5.98	0.337	-5.38
550	0.369	0.353	-3.78	0.331	-5.98	0.335	-5.58
555	0.37	0.364	-2.78	0.33	-6.18	0.338	-5.38
560	0.37	0.355	-3.68	0.332	-5.98	0.339	-5.28
565	0.369	0.355	-3.58	0.33	-6.08	0.335	-5.58
570	0.369	0.353	-3.78	0.33	-6.08	0.339	-5.18
575	0.37	0.357	-3.48	0.332	-5.98	0.337	-5.48
580	0.37	0.353	-3.88	0.33	-6.18	0.337	-5.48
585	0.371	0.368	-2.48	0.331	-6.18	0.336	-5.68
590	0.372	0.353	-4.08	0.331	-6.28	0.336	-5.78
595	0.371	0.351	-4.18	0.332	-6.08	0.338	-5.48
600	0.37	0.352	-3.98	0.33	-6.18	0.338	-5.38
605	0.37	0.351	-4.08	0.331	-6.08	0.335	-5.68
610	0.37	0.351	-4.08	0.332	-5.98	0.338	-5.38
615	0.371	0.352	-4.08	0.331	-6.18	0.338	-5.48
620	0.369	0.352	-3.88	0.331	-5.98	0.336	-5.48
625	0.369	0.352	-3.88	0.331	-5.98	0.337	-5.38
630	0.368	0.35	-3.98	0.332	-5.78	0.338	-5.18
635	0.369	0.352	-3.88	0.332	-5.88	0.34	-5.08
640	0.368	0.353	-3.68	0.331	-5.88	0.338	-5.18
645	0.367	0.353	-3.58	0.332	-5.68	0.338	-5.08
650	0.369	0.351	-3.98	0.332	-5.88	0.337	-5.38
655	0.369	0.35	-4.08	0.33	-6.08	0.335	-5.58
660	0.368	0.352	-3.78	0.331	-5.88	0.339	-5.08
665	0.369	0.354	-3.68	0.332	-5.88	0.335	-5.58
670	0.368	0.351	-3.88	0.33	-5.98	0.335	-5.48
675	0.369	0.352	-3.88	0.333	-5.78	0.335	-5.58
680	0.367	0.351	-3.78	0.333	-5.58	0.332	-5.68
685	0.367	0.353	-3.58	0.331	-5.78	0.335	-5.38
690	0.368	0.355	-3.48	0.329	-6.08	0.336	-5.38
695	0.367	0.354	-3.48	0.329	-5.98	0.333	-5.58
700	0.367	0.356	-3.28	0.331	-5.78	0.336	-5.28
705	0.364	0.355	-3.08	0.332	-5.38	0.334	-5.18
710	0.364	0.355	-3.08	0.333	-5.28	0.335	-5.08
715	0.365	0.355	-3.18	0.331	-5.58	0.335	-5.18
720	0.367	0.357	-3.18	0.33	-5.88	0.335	-5.38
725	0.367	0.356	-3.28	0.332	-5.68	0.336	-5.28
730	0.366	0.36	-2.78	0.333	-5.48	0.334	-5.38
735	0.364	0.359	-2.68	0.333	-5.28	0.337	-4.88
740	0.363	0.36	-2.48	0.335	-4.98	0.336	-4.88
745	0.366	0.359	-2.88	0.333	-5.48	0.336	-5.18
750	0.364	0.364	-2.18	0.334	-5.18	0.336	-4.98
755	0.365	0.362	-2.48	0.332	-5.48	0.336	-5.08
760	0.365	0.365	-2.18	0.334	-5.28	0.338	-4.88
765	0.364	0.364	-2.18	0.332	-5.38	0.335	-5.08
770	0.364	0.363	-2.28	0.334	-5.18	0.337	-4.88
775	0.364	0.363	-2.28	0.335	-5.08	0.337	-4.88
780	0.366	0.362	-2.58	0.334	-5.38	0.335	-5.28
785	0.363	0.363	-2.18	0.336	-4.88	0.337	-4.78
790	0.362	0.366	-1.78	0.336	-4.78	0.337	-4.68
795	0.362	0.368	-1.58	0.338	-4.58	0.337	-4.68
800	0.362	0.367	-1.68	0.339	-4.48	0.339	-4.48
805	0.361	0.371	-1.18	0.337	-4.58	0.337	-4.58
810	0.361	0.37	-1.28	0.337	-4.58	0.34	-4.28
815	0.359	0.367	-1.38	0.338	-4.28	0.339	-4.18
820	0.362	0.369	-1.48	0.337	-4.68	0.34	-4.38
825	0.362	0.37	-1.38	0.34	-4.38	0.339	-4.48
830	0.36	0.369	-1.28	0.344	-3.78	0.339	-4.28
835	0.36	0.371	-1.08	0.341	-4.08	0.34	-4.18
840	0.359	0.375	-0.58	0.343	-3.78	0.34	-4.08
845	0.358	0.372	-0.78	0.342	-3.78	0.34	-3.98
850	0.361	0.374	-0.88	0.341	-4.18	0.337	-4.58
855	0.361	0.386	0.32	0.343	-3.98	0.342	-4.08
860	0.36	0.375	-0.68	0.344	-3.78	0.339	-4.28
865	0.356	0.372	-0.58	0.344	-3.38	0.341	-3.68
870	0.357	0.374	-0.48	0.344	-3.48	0.341	-3.78
875	0.358	0.376	-0.38	0.345	-3.48	0.343	-3.68
880	0.358	0.376	-0.38	0.344	-3.58	0.341	-3.88
885	0.357	0.375	-0.38	0.345	-3.38	0.341	-3.78
890	0.358	0.375	-0.48	0.345	-3.48	0.346	-3.38
895	0.356	0.378	0.02	0.346	-3.18	0.344	-3.38
900	0.356	0.378	0.02	0.346	-3.18	0.342	-3.58
905	0.355	0.379	0.22	0.347	-2.98	0.344	-3.28
910	0.357	0.382	0.32	0.347	-3.18	0.343	-3.58
915	0.355	0.38	0.32	0.347	-2.98	0.343	-3.38
920	0.352	0.38	0.62	0.346	-2.78	0.348	-2.58
925	0.355	0.378	0.12	0.347	-2.98	0.343	-3.38
930	0.355	0.379	0.22	0.346	-3.08	0.343	-3.38
935	0.356	0.38	0.22	0.349	-2.88	0.346	-3.18
940	0.353	0.378	0.32	0.348	-2.68	0.344	-3.08
945	0.353	0.379	0.42	0.346	-2.88	0.347	-2.78
950	0.352	0.381	0.72	0.35	-2.38	0.348	-2.58
955	0.353	0.382	0.72	0.35	-2.48	0.346	-2.88
960	0.353	0.38	0.52	0.347	-2.78	0.347	-2.78
965	0.354	0.381	0.52	0.351	-2.48	0.349	-2.68
970	0.353	0.381	0.62	0.351	-2.38	0.346	-2.88
975	0.352	0.384	1.02	0.35	-2.38	0.35	-2.38
980	0.354	0.381	0.52	0.351	-2.48	0.347	-2.88
985	0.352	0.382	0.82	0.351	-2.28	0.351	-2.28
990	0.349	0.383	1.22	0.352	-1.88	0.349	-2.18
995	0.353	0.382	0.72	0.352	-2.28	0.348	-2.68
1000	0.352	0.384	1.02	0.353	-2.08	0.35	-2.38
1005	0.348	0.383	1.32	0.351	-1.88	0.352	-1.78
1010	0.35	0.383	1.12	0.351	-2.08	0.351	-2.08
1015	0.351	0.382	0.92	0.353	-1.98	0.351	-2.18
1020	0.351	0.385	1.22	0.351	-2.18	0.352	-2.08
1025	0.351	0.384	1.12	0.352	-2.08	0.353	-1.98
1030	0.35	0.384	1.22	0.355	-1.68	0.352	-1.98
1035	0.351	0.386	1.32	0.352	-2.08	0.351	-2.18
1040	0.349	0.386	1.52	0.354	-1.68	0.351	-1.98
1045	0.35	0.385	1.32	0.352	-1.98	0.353	-1.88
1050	0.35	0.385	1.32	0.355	-1.68	0.356	-1.58
1055	0.351	0.385	1.22	0.353	-1.98	0.351	-2.18
1060	0.353	0.386	1.12	0.357	-1.78	0.353	-2.18
1065	0.35	0.387	1.52	0.355	-1.68	0.352	-1.98
1070	0.351	0.386	1.32	0.351	-2.18	0.354	-1.88
1075	0.351	0.385	1.22	0.355	-1.78	0.353	-1.98
1080	0.35	0.389	1.72	0.353	-1.88	0.356	-1.58
1085	0.35	0.387	1.52	0.354	-1.78	0.356	-1.58
1090	0.35	0.386	1.42	0.355	-1.68	0.355	-1.68
1095	0.35	0.387	1.52	0.355	-1.68	0.354	-1.78
1100	0.351	0.388	1.52	0.357	-1.58	0.354	-1.88
1105	0.349	0.387	1.62	0.354	-1.68	0.356	-1.48
1110	0.347	0.388	1.92	0.356	-1.28	0.356	-1.28
1115	0.35	0.39	1.82	0.357	-1.48	0.356	-1.58
1120	0.35	0.393	2.12	0.357	-1.48	0.355	-1.68
1125	0.351	0.389	1.62	0.357	-1.58	0.356	-1.68
1130	0.35	0.391	1.92	0.356	-1.58	0.354	-1.78
1135	0.35	0.392	2.02	0.356	-1.58	0.355	-1.68
1140	0.35	0.39	1.82	0.357	-1.48	0.357	-1.48
1145	0.351	0.393	2.02	0.358	-1.48	0.354	-1.88
1150	0.349	0.39	1.92	0.357	-1.38	0.355	-1.58
1155	0.349	0.393	2.22	0.357	-1.38	0.356	-1.48
1160	0.349	0.392	2.12	0.358	-1.28	0.356	-1.48
1165	0.349	0.393	2.22	0.357	-1.38	0.356	-1.48
1170	0.35	0.391	1.92	0.359	-1.28	0.356	-1.58
1175	0.351	0.393	2.02	0.36	-1.28	0.358	-1.48
1180	0.351	0.393	2.02	0.362	-1.08	0.355	-1.78
1185	0.349	0.393	2.22	0.358	-1.28	0.354	-1.68
1190	0.351	0.395	2.22	0.359	-1.38	0.359	-1.38
1195	0.349	0.392	2.12	0.361	-0.98	0.357	-1.38
1200	0.349	0.392	2.12	0.359	-1.18	0.357	-1.38
1205	0.35	0.393	2.12	0.36	-1.18	0.358	-1.38
1210	0.35	0.393	2.12	0.362	-0.98	0.358	-1.38
1215	0.35	0.395	2.32	0.362	-0.98	0.359	-1.28
1220	0.348	0.396	2.62	0.364	-0.58	0.356	-1.38
1225	0.35	0.394	2.22	0.361	-1.08	0.357	-1.48
1230	0.351	0.394	2.12	0.362	-1.08	0.358	-1.48
1235	0.352	0.395	2.12	0.362	-1.18	0.359	-1.48
1240	0.35	0.393	2.12	0.364	-0.78	0.359	-1.28
1245	0.349	0.394	2.32	0.365	-0.58	0.359	-1.18
1250	0.35	0.396	2.42	0.364	-0.78	0.358	-1.38
1255	0.352	0.397	2.32	0.361	-1.28	0.361	-1.28
1260	0.351	0.398	2.52	0.364	-0.88	0.358	-1.48
1265	0.352	0.397	2.32	0.364	-0.98	0.362	-1.18
1270	0.35	0.397	2.52	0.362	-0.98	0.359	-1.28
1275	0.35	0.396	2.42	0.363	-0.88	0.359	-1.28
1280	0.35	0.397	2.52	0.365	-0.68	0.358	-1.38
1285	0.35	0.396	2.42	0.367	-0.48	0.36	-1.18
1290	0.348	0.398	2.82	0.362	-0.78	0.36	-0.98
1295	0.351	0.395	2.22	0.365	-0.78	0.358	-1.48
1300	0.348	0.396	2.62	0.366	-0.38	0.361	-0.88
1305	0.35	0.399	2.72	0.363	-0.88	0.361	-1.08
1310	0.351	0.4	2.72	0.364	-0.88	0.365	-0.78
1315	0.352	0.395	2.12	0.367	-0.68	0.361	-1.28
1320	0.352	0.399	2.52	0.368	-0.58	0.362	-1.18
1325	0.352	0.399	2.52	0.367	-0.68	0.362	-1.18
1330	0.35	0.4	2.82	0.369	-0.28	0.363	-0.88
1335	0.349	0.4	2.92	0.367	-0.38	0.365	-0.58
1340	0.348	0.399	2.92	0.364	-0.58	0.36	-0.98
1345	0.352	0.401	2.72	0.366	-0.78	0.364	-0.98
1350	0.353	0.401	2.62	0.369	-0.58	0.365	-0.98
1355	0.351	0.401	2.82	0.369	-0.38	0.365	-0.78
1360	0.353	0.402	2.72	0.37	-0.48	0.364	-1.08
1365	0.353	0.415	4.02	0.368	-0.68	0.365	-0.98
1370	0.35	0.4	2.82	0.37	-0.18	0.364	-0.78
1375	0.351	0.405	3.22	0.369	-0.38	0.365	-0.78
1380	0.353	0.402	2.72	0.369	-0.58	0.366	-0.88
1385	0.35	0.402	3.02	0.369	-0.28	0.366	-0.58
1390	0.35	0.403	3.12	0.37	-0.18	0.367	-0.48
1395	0.351	0.403	3.02	0.368	-0.48	0.366	-0.68
1400	0.35	0.406	3.42	0.372	0.02	0.368	-0.38
1405	0.349	0.406	3.52	0.369	-0.18	0.366	-0.48
1410	0.352	0.406	3.22	0.372	-0.18	0.369	-0.48
1415	0.351	0.404	3.12	0.37	-0.28	0.366	-0.68
1420	0.352	0.404	3.02	0.372	-0.18	0.366	-0.78
1425	0.351	0.405	3.22	0.374	0.12	0.368	-0.48
1430	0.352	0.406	3.22	0.371	-0.28	0.364	-0.98
1435	0.351	0.406	3.32	0.37	-0.28	0.367	-0.58
1440	0.35	0.408	3.62	0.37	-0.18	0.369	-0.28
1445	0.35	0.406	3.42	0.373	0.12	0.365	-0.68
1450	0.353	0.407	3.22	0.377	0.22	0.369	-0.58
1455	0.352	0.405	3.12	0.375	0.12	0.366	-0.78
1460	0.351	0.405	3.22	0.376	0.32	0.371	-0.18
1465	0.352	0.405	3.12	0.374	0.02	0.367	-0.68
1470	0.352	0.408	3.42	0.374	0.02	0.369	-0.48
1475	0.35	0.406	3.42	0.376	0.42	0.372	0.02
1480	0.352	0.41	3.62	0.375	0.12	0.369	-0.48
1485	0.351	0.408	3.52	0.378	0.52	0.366	-0.68
1490	0.352	0.407	3.32	0.376	0.22	0.371	-0.28
1495	0.353	0.408	3.32	0.376	0.12	0.37	-0.48
1500	0.35	0.408	3.62	0.375	0.32	0.371	-0.08
1505	0.35	0.408	3.62	0.377	0.52	0.37	-0.18
1510	0.352	0.409	3.52	0.375	0.12	0.37	-0.38
1515	0.354	0.411	3.52	0.375	-0.08	0.372	-0.38
1520	0.349	0.408	3.72	0.375	0.42	0.369	-0.18
1525	0.352	0.408	3.42	0.376	0.22	0.371	-0.28
1530	0.351	0.409	3.62	0.379	0.62	0.372	-0.08
1535	0.354	0.411	3.52	0.376	0.02	0.371	-0.48
1540	0.352	0.408	3.42	0.377	0.32	0.372	-0.18
1545	0.352	0.409	3.52	0.38	0.62	0.37	-0.38
1550	0.353	0.408	3.32	0.378	0.32	0.372	-0.28
1555	0.351	0.411	3.82	0.378	0.52	0.372	-0.08
1560	0.352	0.411	3.72	0.378	0.42	0.373	-0.08
1565	0.354	0.41	3.42	0.379	0.32	0.374	-0.18
1570	0.354	0.411	3.52	0.381	0.52	0.374	-0.18
1575	0.35	0.415	4.32	0.377	0.52	0.374	0.22
1580	0.354	0.412	3.62	0.378	0.22	0.373	-0.28
1585	0.351	0.411	3.82	0.38	0.72	0.375	0.22
1590	0.352	0.412	3.82	0.38	0.62	0.373	-0.08
1595	0.351	0.411	3.82	0.381	0.82	0.373	0.02
1600	0.35	0.411	3.92	0.38	0.82	0.371	-0.08
1605	0.352	0.413	3.92	0.378	0.42	0.376	0.22
1610	0.35	0.415	4.32	0.38	0.82	0.374	0.22
1615	0.351	0.412	3.92	0.382	0.92	0.374	0.12
1620	0.353	0.416	4.12	0.38	0.52	0.375	0.02
1625	0.354	0.412	3.62	0.383	0.72	0.377	0.12
1630	0.354	0.412	3.62	0.383	0.72	0.372	-0.38
1635	0.351	0.413	4.02	0.382	0.92	0.376	0.32
1640	0.354	0.414	3.82	0.383	0.72	0.374	-0.18
1645	0.353	0.414	3.92	0.382	0.72	0.376	0.12
1650	0.354	0.413	3.72	0.382	0.62	0.376	0.02
1655	0.353	0.415	4.02	0.382	0.72	0.378	0.32
1660	0.352	0.414	4.02	0.382	0.82	0.376	0.22
1665	0.351	0.418	4.52	0.383	1.02	0.378	0.52
1670	0.352	0.416	4.22	0.383	0.92	0.378	0.42
1675	0.353	0.415	4.02	0.384	0.92	0.377	0.22
1680	0.353	0.418	4.32	0.382	0.72	0.376	0.12
1685	0.354	0.42	4.42	0.381	0.52	0.378	0.22
1690	0.35	0.418	4.62	0.382	1.02	0.38	0.82
1695	0.351	0.414	4.12	0.384	1.12	0.378	0.52
1700	0.353	0.415	4.02	0.383	0.82	0.377	0.22
1705	0.354	0.416	4.02	0.385	0.92	0.38	0.42
1710	0.354	0.415	3.92	0.382	0.62	0.38	0.42
1715	0.354	0.417	4.12	0.383	0.72	0.38	0.42
1720	0.355	0.418	4.12	0.382	0.52	0.378	0.12
1725	0.354	0.419	4.32	0.384	0.82	0.381	0.52
1730	0.354	0.419	4.32	0.386	1.02	0.378	0.22
1735	0.352	0.42	4.62	0.384	1.02	0.381	0.72
1740	0.351	0.417	4.42	0.385	1.22	0.381	0.82
1745	0.352	0.42	4.62	0.384	1.02	0.38	0.62
1750	0.352	0.417	4.32	0.385	1.12	0.382	0.82
1755	0.353	0.419	4.42	0.386	1.12	0.379	0.42
1760	0.353	0.421	4.62	0.386	1.12	0.38	0.52
1765	0.351	0.421	4.82	0.386	1.32	0.38	0.72
1770	0.354	0.417	4.12	0.389	1.32	0.382	0.62
1775	0.354	0.418	4.22	0.387	1.12	0.381	0.52
1780	0.354	0.421	4.52	0.387	1.12	0.383	0.72
1785	0.353	0.42	4.52	0.386	1.12	0.383	0.82
1790	0.354	0.422	4.62	0.386	1.02	0.381	0.52
1795	0.354	0.42	4.42	0.386	1.02	0.383	0.72
1800	0.355	0.423	4.62	0.388	1.12	0.384	0.72

## Sheet: 1000Tu_Mo
Time (sec)	BG_OD360	1st_OD360	1st_ΔPi con. (μM)	2nd_OD360	2nd_ΔPi con. (μM)	3rd_OD360	3rd_ΔPi con. (μM)
	0.035	0.022		-0.009		0.002
5	0.044	0.034	-3.18	0.001	-6.48	0.011	-5.48
10	0.056	0.046	-3.18	0.012	-6.58	0.02	-5.78
15	0.067	0.059	-2.98	0.025	-6.38	0.03	-5.88
20	0.078	0.071	-2.88	0.032	-6.78	0.04	-5.98
25	0.087	0.079	-2.98	0.043	-6.58	0.049	-5.98
30	0.098	0.092	-2.78	0.053	-6.68	0.055	-6.48
35	0.109	0.103	-2.78	0.065	-6.58	0.067	-6.38
40	0.119	0.113	-2.78	0.075	-6.58	0.076	-6.48
45	0.127	0.125	-2.38	0.084	-6.48	0.084	-6.48
50	0.137	0.136	-2.28	0.095	-6.38	0.091	-6.78
55	0.147	0.147	-2.18	0.106	-6.28	0.101	-6.78
60	0.156	0.158	-1.98	0.114	-6.38	0.11	-6.78
65	0.164	0.167	-1.88	0.124	-6.18	0.12	-6.58
70	0.172	0.175	-1.88	0.135	-5.88	0.126	-6.78
75	0.179	0.188	-1.28	0.142	-5.88	0.134	-6.68
80	0.189	0.197	-1.38	0.152	-5.88	0.142	-6.88
85	0.195	0.203	-1.38	0.161	-5.58	0.148	-6.88
90	0.203	0.212	-1.28	0.17	-5.48	0.158	-6.68
95	0.21	0.221	-1.08	0.178	-5.38	0.164	-6.78
100	0.217	0.229	-0.98	0.187	-5.18	0.172	-6.68
105	0.223	0.234	-1.08	0.191	-5.38	0.178	-6.68
110	0.229	0.243	-0.78	0.2	-5.08	0.183	-6.78
115	0.236	0.251	-0.68	0.204	-5.38	0.187	-7.08
120	0.241	0.257	-0.58	0.209	-5.38	0.194	-6.88
125	0.248	0.263	-0.68	0.215	-5.48	0.2	-6.98
130	0.253	0.27	-0.48	0.221	-5.38	0.204	-7.08
135	0.259	0.273	-0.78	0.225	-5.58	0.208	-7.28
140	0.263	0.28	-0.48	0.231	-5.38	0.213	-7.18
145	0.269	0.285	-0.58	0.236	-5.48	0.217	-7.38
150	0.272	0.289	-0.48	0.238	-5.58	0.223	-7.08
155	0.279	0.295	-0.58	0.245	-5.58	0.227	-7.38
160	0.282	0.301	-0.28	0.249	-5.48	0.232	-7.18
165	0.285	0.304	-0.28	0.252	-5.48	0.235	-7.18
170	0.291	0.309	-0.38	0.256	-5.68	0.241	-7.18
175	0.296	0.313	-0.48	0.259	-5.88	0.245	-7.28
180	0.3	0.314	-0.78	0.266	-5.58	0.247	-7.48
185	0.302	0.318	-0.58	0.267	-5.68	0.25	-7.38
190	0.307	0.323	-0.58	0.27	-5.88	0.256	-7.28
195	0.309	0.323	-0.78	0.276	-5.48	0.256	-7.48
200	0.314	0.326	-0.98	0.277	-5.88	0.263	-7.28
205	0.316	0.329	-0.88	0.282	-5.58	0.263	-7.48
210	0.319	0.332	-0.88	0.284	-5.68	0.269	-7.18
215	0.321	0.334	-0.88	0.286	-5.68	0.272	-7.08
220	0.326	0.335	-1.28	0.288	-5.98	0.274	-7.38
225	0.339	0.339	-2.18	0.293	-6.78	0.278	-8.28
230	0.332	0.341	-1.28	0.295	-5.88	0.281	-7.28
235	0.331	0.342	-1.08	0.294	-5.88	0.285	-6.78
240	0.336	0.344	-1.38	0.303	-5.48	0.287	-7.08
245	0.336	0.343	-1.48	0.302	-5.58	0.289	-6.88
250	0.339	0.344	-1.68	0.303	-5.78	0.291	-6.98
255	0.343	0.35	-1.48	0.307	-5.78	0.296	-6.88
260	0.343	0.349	-1.58	0.31	-5.48	0.298	-6.68
265	0.345	0.35	-1.68	0.311	-5.58	0.299	-6.78
270	0.348	0.351	-1.88	0.313	-5.68	0.303	-6.68
275	0.348	0.352	-1.78	0.314	-5.58	0.304	-6.58
280	0.349	0.355	-1.58	0.317	-5.38	0.304	-6.68
285	0.356	0.358	-1.98	0.318	-5.98	0.308	-6.98
290	0.354	0.358	-1.78	0.317	-5.88	0.311	-6.48
295	0.354	0.357	-1.88	0.321	-5.48	0.31	-6.58
300	0.356	0.36	-1.78	0.325	-5.28	0.315	-6.28
305	0.36	0.358	-2.38	0.324	-5.78	0.315	-6.68
310	0.361	0.361	-2.18	0.327	-5.58	0.317	-6.58
315	0.362	0.363	-2.08	0.328	-5.58	0.32	-6.38
320	0.364	-0.85	-123.58	0.33	-5.58	0.32	-6.58
325	0.366	-0.848	-123.58	0.331	-5.68	0.322	-6.58
330	0.369	0.312	-7.88	0.331	-5.98	0.323	-6.78
335	0.368	0.317	-7.28	0.33	-5.98	0.323	-6.68
340	0.37	0.321	-7.08	0.332	-5.98	0.322	-6.98
345	0.371	0.32	-7.28	0.332	-6.08	0.326	-6.68
350	0.373	0.326	-6.88	0.333	-6.18	0.324	-7.08
355	0.372	0.325	-6.88	-0.853	-124.68	0.327	-6.68
360	0.373	0.333	-6.18	-0.853	-124.78	0.325	-6.98
365	0.372	0.333	-6.08	-0.44	-83.38	0.327	-6.68
370	0.377	0.332	-6.68	0.295	-10.38	-0.854	-125.28
375	0.376	0.336	-6.18	0.296	-10.18	-0.855	-125.28
380	0.376	0.343	-5.48	0.296	-10.18	0.304	-9.38
385	0.373	0.342	-5.28	0.297	-9.78	0.301	-9.38
390	0.379	0.344	-5.68	0.298	-10.28	0.302	-9.88
395	0.378	0.346	-5.38	0.302	-9.78	0.304	-9.58
400	0.378	0.347	-5.28	0.303	-9.68	0.304	-9.58
405	0.38	0.349	-5.28	0.303	-9.88	0.306	-9.58
410	0.377	0.351	-4.78	0.305	-9.38	0.305	-9.38
415	0.375	0.352	-4.48	0.311	-8.58	0.307	-8.98
420	0.379	0.354	-4.68	0.311	-8.98	0.309	-9.18
425	0.38	0.356	-4.58	0.312	-8.98	0.307	-9.48
430	0.377	0.358	-4.08	0.314	-8.48	0.311	-8.78
435	0.375	0.358	-3.88	0.318	-7.88	0.313	-8.38
440	0.38	0.358	-4.38	0.319	-8.28	0.311	-9.08
445	0.378	0.361	-3.88	0.32	-7.98	0.313	-8.68
450	0.378	0.363	-3.68	0.322	-7.78	0.315	-8.48
455	0.38	0.366	-3.58	0.326	-7.58	0.315	-8.68
460	0.379	0.364	-3.68	0.328	-7.28	0.316	-8.48
465	0.379	0.366	-3.48	0.329	-7.18	0.321	-7.98
470	0.378	0.37	-2.98	0.33	-6.98	0.321	-7.88
475	0.378	0.369	-3.08	0.332	-6.78	0.322	-7.78
480	0.378	0.369	-3.08	0.334	-6.58	0.325	-7.48
485	0.378	0.37	-2.98	0.332	-6.78	0.326	-7.38
490	0.375	0.373	-2.38	0.335	-6.18	0.325	-7.18
495	0.381	0.375	-2.78	0.339	-6.38	0.327	-7.58
500	0.377	0.376	-2.28	0.339	-5.98	0.329	-6.98
505	0.379	0.376	-2.48	0.34	-6.08	0.332	-6.88
510	0.375	0.379	-1.78	0.341	-5.58	0.332	-6.48
515	0.375	0.38	-1.68	0.343	-5.38	0.334	-6.28
520	0.378	0.382	-1.78	0.343	-5.68	0.337	-6.28
525	0.376	0.395	-0.28	0.344	-5.38	0.335	-6.28
530	0.374	0.384	-1.18	0.346	-4.98	0.336	-5.98
535	0.377	0.385	-1.38	0.346	-5.28	0.338	-6.08
540	0.376	0.387	-1.08	0.347	-5.08	0.336	-6.18
545	0.374	0.392	-0.38	0.348	-4.78	0.341	-5.48
550	0.373	0.394	-0.08	0.35	-4.48	0.34	-5.48
555	0.372	0.391	-0.28	0.352	-4.18	0.344	-4.98
560	0.374	0.395	-0.08	0.353	-4.28	0.344	-5.18
565	0.374	0.397	0.12	0.355	-4.08	0.346	-4.98
570	0.373	0.395	0.02	0.356	-3.88	0.347	-4.78
575	0.37	0.403	1.12	0.357	-3.48	0.347	-4.48
580	0.373	0.403	0.82	0.355	-3.98	0.347	-4.78
585	0.373	0.404	0.92	0.36	-3.48	0.351	-4.38
590	0.371	0.404	1.12	0.36	-3.28	0.348	-4.48
595	0.371	0.406	1.32	0.363	-2.98	0.35	-4.28
600	0.371	0.405	1.22	0.362	-3.08	0.351	-4.18
605	0.367	0.409	2.02	0.365	-2.38	0.35	-3.88
610	0.366	0.412	2.42	0.364	-2.38	0.353	-3.48
615	0.367	0.418	2.92	0.367	-2.18	0.353	-3.58
620	0.366	0.417	2.92	0.369	-1.88	0.353	-3.48
625	0.366	0.414	2.62	0.37	-1.78	0.355	-3.28
630	0.365	0.416	2.92	0.372	-1.48	0.357	-2.98
635	0.365	0.42	3.32	0.372	-1.48	0.358	-2.88
640	0.364	0.423	3.72	0.375	-1.08	0.357	-2.88
645	0.365	0.424	3.72	0.376	-1.08	0.357	-2.98
650	0.359	0.429	4.82	0.376	-0.48	0.359	-2.18
655	0.361	0.427	4.42	0.379	-0.38	0.359	-2.38
660	0.359	0.428	4.72	0.379	-0.18	0.359	-2.18
665	0.361	0.429	4.62	0.384	0.12	0.361	-2.18
670	0.354	0.431	5.52	0.382	0.62	0.362	-1.38
675	0.358	0.432	5.22	0.384	0.42	0.364	-1.58
680	0.354	0.434	5.82	0.388	1.22	0.364	-1.18
685	0.355	0.437	6.02	0.388	1.12	0.364	-1.28
690	0.357	0.439	6.02	0.404	2.52	0.364	-1.48
695	0.356	0.441	6.32	0.388	1.02	0.364	-1.38
700	0.354	0.439	6.32	0.392	1.62	0.367	-0.88
705	0.353	0.443	6.82	0.393	1.82	0.366	-0.88
710	0.351	0.444	7.12	0.395	2.22	0.366	-0.68
715	0.353	0.446	7.12	0.397	2.22	0.371	-0.38
720	0.352	0.445	7.12	0.399	2.52	0.369	-0.48
725	0.353	0.447	7.22	0.4	2.52	0.371	-0.38
730	0.351	0.45	7.72	0.402	2.92	0.371	-0.18
735	0.353	0.45	7.52	0.403	2.82	0.372	-0.28
740	0.352	0.451	7.72	0.405	3.12	0.373	-0.08
745	0.349	0.453	8.22	0.403	3.22	0.376	0.52
750	0.35	0.455	8.32	0.406	3.42	0.375	0.32
755	0.35	0.455	8.32	0.406	3.42	0.376	0.42
760	0.35	0.456	8.42	0.407	3.52	0.379	0.72
765	0.352	0.458	8.42	0.409	3.52	0.38	0.62
770	0.351	0.457	8.42	0.409	3.62	0.38	0.72
775	0.353	0.463	8.82	0.413	3.82	0.379	0.42
780	0.352	0.463	8.92	0.413	3.92	0.382	0.82
785	0.35	0.464	9.22	0.412	4.02	0.382	1.02
790	0.351	0.463	9.02	0.416	4.32	0.381	0.82
795	0.351	0.465	9.22	0.417	4.42	0.383	1.02
800	0.352	0.466	9.22	0.418	4.42	0.382	0.82
805	0.355	0.464	8.72	0.418	4.12	0.383	0.62
810	0.348	0.467	9.72	0.42	5.02	0.385	1.52
815	0.351	0.472	9.92	0.419	4.62	0.385	1.22
820	0.352	0.471	9.72	0.421	4.72	0.388	1.42
825	0.35	0.47	9.82	0.421	4.92	0.386	1.42
830	0.351	0.472	9.92	0.424	5.12	0.388	1.52
835	0.35	0.471	9.92	0.422	5.02	0.389	1.72
840	0.352	0.471	9.72	0.425	5.12	0.391	1.72
845	0.351	0.469	9.62	0.425	5.22	0.392	1.92
850	0.352	0.474	10.02	0.425	5.12	0.392	1.82
855	0.35	0.475	10.32	0.425	5.32	0.394	2.22
860	0.354	0.476	10.02	0.427	5.12	0.394	1.82
865	0.351	0.477	10.42	0.43	5.72	0.394	2.12
870	0.351	0.477	10.42	0.428	5.52	0.395	2.22
875	0.351	0.475	10.22	0.43	5.72	0.395	2.22
880	0.352	0.48	10.62	0.431	5.72	0.396	2.22
885	0.349	0.477	10.62	0.432	6.12	0.4	2.92
890	0.352	0.479	10.52	0.431	5.72	0.4	2.62
895	0.351	0.478	10.52	0.435	6.22	0.399	2.62
900	0.35	0.482	11.02	0.433	6.12	0.4	2.82
905	0.352	0.48	10.62	0.435	6.12	0.401	2.72
910	0.353	0.481	10.62	0.432	5.72	0.405	3.02
915	0.352	0.485	11.12	0.435	6.12	0.404	3.02
920	0.353	0.481	10.62	0.439	6.42	0.404	2.92
925	0.351	0.485	11.22	0.436	6.32	0.405	3.22
930	0.349	0.486	11.52	0.437	6.62	0.407	3.62
935	0.352	0.483	10.92	0.437	6.32	0.407	3.32
940	0.351	0.484	11.12	0.44	6.72	0.407	3.42
945	0.352	0.486	11.22	0.444	7.02	0.408	3.42
950	0.35	0.489	11.72	0.441	6.92	0.409	3.72
955	0.353	0.484	10.92	0.439	6.42	0.413	3.82
960	0.351	0.489	11.62	0.442	6.92	0.411	3.82
965	0.353	0.486	11.12	0.444	6.92	0.413	3.82
970	0.354	0.485	10.92	0.44	6.42	0.416	4.02
975	0.354	0.488	11.22	0.444	6.82	0.414	3.82
980	0.351	0.489	11.62	0.447	7.42	0.417	4.42
985	0.351	0.489	11.62	0.446	7.32	0.414	4.12
990	0.35	0.491	11.92	0.445	7.32	0.418	4.62
995	0.353	0.49	11.52	0.444	6.92	0.419	4.42
1000	0.352	0.488	11.42	0.446	7.22	0.419	4.52
1005	0.352	0.493	11.92	0.446	7.22	0.418	4.42
1010	0.353	0.489	11.42	0.445	7.02	0.419	4.42
1015	0.351	0.489	11.62	0.447	7.42	0.421	4.82
1020	0.351	0.493	12.02	0.447	7.42	0.42	4.72
1025	0.352	0.492	11.82	0.447	7.32	0.422	4.82
1030	0.356	0.491	11.32	0.447	6.92	0.422	4.42
1035	0.354	0.493	11.72	0.448	7.22	0.423	4.72
1040	0.351	0.495	12.22	0.451	7.82	0.43	5.72
1045	0.352	0.495	12.12	0.448	7.42	0.425	5.12
1050	0.353	0.495	12.02	0.452	7.72	0.424	4.92
1055	0.352	0.5	12.62	0.451	7.72	0.427	5.32
1060	0.354	0.497	12.12	0.449	7.32	0.427	5.12
1065	0.354	0.496	12.02	0.451	7.52	0.425	4.92
1070	0.353	0.495	12.02	0.453	7.82	0.426	5.12
1075	0.355	0.499	12.22	0.454	7.72	0.425	4.82
1080	0.353	0.497	12.22	0.454	7.92	0.428	5.32
1085	0.355	0.496	11.92	0.453	7.62	0.429	5.22
1090	0.355	0.498	12.12	0.453	7.62	0.429	5.22
1095	0.355	0.502	12.52	0.455	7.82	0.43	5.32
1100	0.354	0.497	12.12	0.456	8.02	0.43	5.42
1105	0.354	0.5	12.42	0.454	7.82	0.43	5.42
1110	0.356	0.501	12.32	0.456	7.82	0.428	5.02
1115	0.355	0.503	12.62	0.454	7.72	0.43	5.32
1120	0.353	0.498	12.32	0.459	8.42	0.429	5.42
1125	0.354	0.501	12.52	0.46	8.42	0.431	5.52
1130	0.354	0.501	12.52	0.457	8.12	0.431	5.52
1135	0.354	0.503	12.72	0.459	8.32	0.432	5.62
1140	0.354	0.498	12.22	0.458	8.22	0.431	5.52
1145	0.353	0.505	13.02	0.46	8.52	0.432	5.72
1150	0.355	0.506	12.92	0.461	8.42	0.434	5.72
1155	0.353	0.506	13.12	0.461	8.62	0.429	5.42
1160	0.354	0.506	13.02	0.46	8.42	0.434	5.82
1165	0.355	0.506	12.92	0.462	8.52	0.434	5.72
1170	0.356	0.506	12.82	0.463	8.52	0.434	5.62
1175	0.357	0.505	12.62	0.463	8.42	0.434	5.52
1180	0.353	0.505	13.02	0.461	8.62	0.433	5.82
1185	0.353	0.51	13.52	0.465	9.02	0.435	6.02
1190	0.357	0.51	13.12	0.465	8.62	0.432	5.32
1195	0.356	0.509	13.12	0.464	8.62	0.434	5.62
1200	0.356	0.509	13.12	0.464	8.62	0.435	5.72
1205	0.356	0.509	13.12	0.471	9.32	0.437	5.92
1210	0.356	0.505	12.72	0.467	8.92	0.437	5.92
1215	0.357	0.511	13.22	0.464	8.52	0.438	5.92
1220	0.356	0.508	13.02	0.467	8.92	0.435	5.72
1225	0.357	0.507	12.82	0.467	8.82	0.435	5.62
1230	0.355	0.512	13.52	0.467	9.02	0.437	6.02
1235	0.357	0.513	13.42	0.47	9.12	0.436	5.72
1240	0.356	0.512	13.42	0.468	9.02	0.438	6.02
1245	0.357	0.508	12.92	0.467	8.82	0.438	5.92
1250	0.356	0.514	13.62	0.469	9.12	0.438	6.02
1255	0.356	0.514	13.62	0.469	9.12	0.44	6.22
1260	0.357	0.512	13.32	0.465	8.62	0.436	5.72
1265	0.357	0.511	13.22	0.47	9.12	0.438	5.92
1270	0.357	0.513	13.42	0.471	9.22	0.441	6.22
1275	0.357	0.512	13.32	0.471	9.22	0.44	6.12
1280	0.355	0.513	13.62	0.472	9.52	0.44	6.32
1285	0.358	0.511	13.12	0.471	9.12	0.442	6.22
1290	0.358	0.512	13.22	0.473	9.32	0.441	6.12
1295	0.358	0.517	13.72	0.473	9.32	0.441	6.12
1300	0.36	0.51	12.82	0.476	9.42	0.443	6.12
1305	0.354	0.515	13.92	0.474	9.82	0.442	6.62
1310	0.357	0.514	13.52	0.477	9.82	0.441	6.22
1315	0.353	0.514	13.92	0.475	10.02	0.443	6.82
1320	0.358	0.513	13.32	0.474	9.42	0.445	6.52
1325	0.356	0.515	13.72	0.476	9.82	0.443	6.52
1330	0.355	0.515	13.82	0.475	9.82	0.443	6.62
1335	0.357	0.514	13.52	0.477	9.82	0.44	6.12
1340	0.356	0.516	13.82	0.477	9.92	0.443	6.52
1345	0.356	0.516	13.82	0.476	9.82	0.444	6.62
1350	0.359	0.514	13.32	0.479	9.82	0.442	6.12
1355	0.357	0.517	13.82	0.478	9.92	0.445	6.62
1360	0.358	0.514	13.42	0.48	10.02	0.448	6.82
1365	0.356	0.517	13.92	0.479	10.12	0.445	6.72
1370	0.359	0.519	13.82	0.478	9.72	0.444	6.32
1375	0.355	0.518	14.12	0.481	10.42	0.446	6.92
1380	0.355	0.518	14.12	0.481	10.42	0.447	7.02
1385	0.357	0.517	13.82	0.48	10.12	0.445	6.62
1390	0.359	0.521	14.02	0.479	9.82	0.447	6.62
1395	0.359	0.518	13.72	0.48	9.92	0.449	6.82
1400	0.356	0.517	13.92	0.478	10.02	0.447	6.92
1405	0.356	0.521	14.32	0.485	10.72	0.448	7.02
1410	0.359	0.517	13.62	0.484	10.32	0.448	6.72
1415	0.357	0.522	14.32	0.482	10.32	0.443	6.42
1420	0.359	0.521	14.02	0.484	10.32	0.448	6.72
1425	0.357	0.519	14.02	0.487	10.82	0.445	6.62
1430	0.359	0.521	14.02	0.484	10.32	0.448	6.72
1435	0.359	0.521	14.02	0.484	10.32	0.45	6.92
1440	0.358	0.52	14.02	0.485	10.52	0.45	7.02
1445	0.358	0.521	14.12	0.486	10.62	0.451	7.12
1450	0.359	0.524	14.32	0.482	10.12	0.451	7.02
1455	0.355	0.523	14.62	0.487	11.02	0.451	7.42
1460	0.359	0.524	14.32	0.487	10.62	0.452	7.12
1465	0.359	0.522	14.12	0.489	10.82	0.453	7.22
1470	0.358	0.524	14.42	0.487	10.72	0.452	7.22
1475	0.356	0.523	14.52	0.488	11.02	0.453	7.52
1480	0.358	0.525	14.52	0.488	10.82	0.451	7.12
1485	0.358	0.522	14.22	0.488	10.82	0.45	7.02
1490	0.357	0.524	14.52	0.488	10.92	0.453	7.42
1495	0.357	0.525	14.62	0.498	11.92	0.452	7.32
1500	0.358	0.527	14.72	0.491	11.12	0.455	7.52
1505	0.357	0.524	14.52	0.489	11.02	0.454	7.52
1510	0.358	0.526	14.62	0.492	11.22	0.456	7.62
1515	0.358	0.525	14.52	0.492	11.22	0.456	7.62
1520	0.357	0.53	15.12	0.495	11.62	0.456	7.72
1525	0.36	0.523	14.12	0.494	11.22	0.455	7.32
1530	0.357	0.53	15.12	0.495	11.62	0.456	7.72
1535	0.358	0.527	14.72	0.494	11.42	0.458	7.82
1540	0.356	0.526	14.82	0.494	11.62	0.455	7.72
1545	0.356	0.527	14.92	0.495	11.72	0.454	7.62
1550	0.358	0.528	14.82	0.495	11.52	0.458	7.82
1555	0.357	0.528	14.92	0.493	11.42	0.456	7.72
1560	0.361	0.526	14.32	0.497	11.42	0.459	7.62
1565	0.36	0.528	14.62	0.496	11.42	0.458	7.62
1570	0.358	0.531	15.12	0.495	11.52	0.459	7.92
1575	0.36	0.551	16.92	0.498	11.62	0.46	7.82
1580	0.358	0.528	14.82	0.495	11.52	0.458	7.82
1585	0.358	0.53	15.02	0.498	11.82	0.459	7.92
1590	0.357	0.53	15.12	0.501	12.22	0.46	8.12
1595	0.358	0.529	14.92	0.499	11.92	0.461	8.12
1600	0.357	0.532	15.32	0.498	11.92	0.458	7.92
1605	0.357	0.531	15.22	0.5	12.12	0.461	8.22
1610	0.359	0.528	14.72	0.499	11.82	0.461	8.02
1615	0.357	0.528	14.92	0.501	12.22	0.462	8.32
1620	0.362	0.529	14.52	0.502	11.82	0.458	7.42
1625	0.361	0.534	15.12	0.503	12.02	0.462	7.92
1630	0.359	0.529	14.82	0.502	12.12	0.462	8.12
1635	0.358	0.529	14.92	0.503	12.32	0.464	8.42
1640	0.36	0.532	15.02	0.503	12.12	0.462	8.02
1645	0.358	0.531	15.12	0.502	12.22	0.462	8.22
1650	0.358	0.534	15.42	0.502	12.22	0.466	8.62
1655	0.357	0.535	15.62	0.503	12.42	0.464	8.52
1660	0.358	0.534	15.42	0.503	12.32	0.462	8.22
1665	0.359	0.533	15.22	0.503	12.22	0.462	8.12
1670	0.358	0.532	15.22	0.505	12.52	0.466	8.62
1675	0.359	0.534	15.32	0.503	12.22	0.466	8.52
1680	0.36	0.537	15.52	0.503	12.12	0.466	8.42
1685	0.359	0.535	15.42	0.502	12.12	0.466	8.52
1690	0.361	0.536	15.32	0.505	12.22	0.467	8.42
1695	0.359	0.537	15.62	0.505	12.42	0.464	8.32
1700	0.361	0.533	15.02	0.505	12.22	0.467	8.42
1705	0.361	0.534	15.12	0.507	12.42	0.465	8.22
1710	0.361	0.537	15.42	0.504	12.12	0.467	8.42
1715	0.357	0.537	15.82	0.502	12.32	0.468	8.92
1720	0.362	0.536	15.22	0.503	11.92	0.469	8.52
1725	0.358	0.538	15.82	0.506	12.62	0.468	8.82
1730	0.359	0.541	16.02	0.505	12.42	0.472	9.12
1735	0.36	0.54	15.82	0.504	12.22	0.471	8.92
1740	0.359	0.538	15.72	0.505	12.42	0.47	8.92
1745	0.359	0.54	15.92	0.503	12.22	0.473	9.22
1750	0.361	0.541	15.82	0.506	12.32	0.47	8.72
1755	0.359	0.541	16.02	0.505	12.42	0.472	9.12
1760	0.36	0.539	15.72	0.507	12.52	0.473	9.12
1765	0.36	0.539	15.72	0.506	12.42	0.473	9.12
1770	0.361	0.539	15.62	0.508	12.52	0.472	8.92
1775	0.362	0.542	15.82	0.507	12.32	0.472	8.82
1780	0.359	0.54	15.92	0.507	12.62	0.472	9.12
1785	0.359	0.542	16.12	0.508	12.72	0.472	9.12
1790	0.362	0.545	16.12	0.507	12.32	0.47	8.62
1795	0.359	0.542	16.12	0.507	12.62	0.474	9.32
1800	0.363	0.546	16.12	0.509	12.42	0.475	9.02

## Sheet: 3000Tu_Mo
Time (sec)	BG_OD360	1st_OD360	1st_ΔPi con. (μM)	2nd_OD360	2nd_ΔPi con. (μM)	3rd_OD360	3rd_ΔPi con. (μM)
	0.011	0.006		0.016		-0.006
5	0.026	0.02	-2.78	0.032	-1.58	0	-4.78
10	0.043	0.033	-3.18	0.046	-1.88	0.011	-5.38
15	0.057	0.047	-3.18	0.059	-1.98	0.019	-5.98
20	0.069	0.059	-3.18	0.073	-1.78	0.028	-6.28
25	0.084	0.069	-3.68	0.082	-2.38	0.036	-6.98
30	0.095	0.079	-3.78	0.095	-2.18	0.046	-7.08
35	0.105	0.088	-3.88	0.106	-2.08	0.058	-6.88
40	0.118	0.099	-4.08	0.116	-2.38	0.064	-7.58
45	0.129	0.107	-4.38	0.124	-2.68	0.078	-7.28
50	0.138	0.116	-4.38	0.132	-2.78	0.088	-7.18
55	0.147	0.124	-4.48	0.142	-2.68	0.094	-7.48
60	0.155	0.132	-4.48	0.15	-2.68	0.106	-7.08
65	0.165	0.143	-4.38	0.16	-2.68	0.115	-7.18
70	0.172	0.146	-4.78	0.168	-2.58	0.122	-7.18
75	0.179	0.156	-4.48	0.175	-2.58	0.13	-7.08
80	0.184	0.162	-4.38	0.185	-2.08	0.139	-6.68
85	0.193	0.168	-4.68	0.19	-2.48	0.148	-6.68
90	0.2	0.177	-4.48	0.198	-2.38	0.154	-6.78
95	0.207	0.184	-4.48	0.204	-2.48	0.161	-6.78
100	0.21	0.188	-4.38	0.209	-2.28	0.169	-6.28
105	0.214	0.194	-4.18	0.214	-2.18	0.172	-6.38
110	0.222	0.197	-4.68	0.219	-2.48	0.18	-6.38
115	0.227	0.204	-4.48	0.223	-2.58	0.186	-6.28
120	0.23	0.211	-4.08	0.228	-2.38	0.189	-6.28
125	0.235	0.215	-4.18	0.234	-2.28	0.197	-5.98
130	0.239	0.22	-4.08	0.237	-2.38	0.201	-5.98
135	0.244	0.221	-4.48	0.242	-2.38	0.206	-5.98
140	0.246	0.227	-4.08	0.246	-2.18	0.213	-5.48
145	0.25	0.233	-3.88	0.248	-2.38	0.219	-5.28
150	0.252	0.238	-3.58	0.249	-2.48	0.22	-5.38
155	0.255	0.243	-3.38	0.255	-2.18	0.226	-5.08
160	0.258	0.245	-3.48	0.258	-2.18	0.23	-4.98
165	0.261	0.247	-3.58	0.262	-2.08	0.233	-4.98
170	0.265	0.251	-3.58	0.266	-2.08	0.239	-4.78
175	0.266	0.254	-3.38	0.27	-1.78	0.242	-4.58
180	0.269	0.27	-2.08	0.272	-1.88	0.246	-4.48
185	0.27	0.269	-2.28	0.275	-1.68	0.252	-3.98
190	0.274	0.266	-2.98	0.277	-1.88	0.253	-4.28
195	0.275	0.268	-2.88	0.279	-1.78	0.257	-3.98
200	0.277	0.27	-2.88	0.282	-1.68	0.257	-4.18
205	0.278	0.273	-2.68	0.286	-1.38	0.262	-3.78
210	0.28	0.275	-2.68	0.287	-1.48	0.263	-3.88
215	0.283	0.278	-2.68	0.288	-1.68	0.268	-3.68
220	0.285	0.279	-2.78	0.29	-1.68	0.273	-3.38
225	0.284	0.284	-2.18	0.29	-1.58	0.275	-3.08
230	0.288	0.287	-2.28	0.291	-1.88	0.275	-3.48
235	0.289	0.289	-2.18	0.294	-1.68	0.278	-3.28
240	0.289	0.29	-2.08	0.296	-1.48	0.281	-2.98
245	0.292	0.292	-2.18	0.301	-1.28	0.283	-3.08
250	0.291	0.297	-1.58	0.298	-1.48	0.284	-2.88
255	0.294	0.295	-2.08	0.302	-1.38	0.288	-2.78
260	0.293	0.301	-1.38	0.305	-0.98	0.29	-2.48
265	0.294	0.302	-1.38	0.305	-1.08	0.29	-2.58
270	0.296	0.305	-1.28	0.307	-1.08	0.294	-2.38
275	0.298	0.306	-1.38	0.31	-0.98	0.296	-2.38
280	0.297	0.307	-1.18	0.312	-0.68	0.296	-2.28
285	0.299	0.31	-1.08	0.31	-1.08	0.299	-2.18
290	0.301	0.311	-1.18	0.313	-0.98	0.301	-2.18
295	0.301	0.314	-0.88	0.311	-1.18	0.304	-1.88
300	0.301	0.314	-0.88	0.314	-0.88	0.306	-1.68
305	0.303	0.316	-0.88	0.315	-0.98	0.304	-2.08
310	0.304	0.319	-0.68	0.317	-0.88	0.309	-1.68
315	0.303	0.321	-0.38	0.315	-0.98	0.311	-1.38
320	0.304	0.32	-0.58	0.318	-0.78	0.313	-1.28
325	0.303	0.322	-0.28	0.317	-0.78	0.31	-1.48
330	0.304	0.323	-0.28	0.319	-0.68	0.313	-1.28
335	0.305	-0.763	-108.98	0.325	-0.18	0.315	-1.18
340	0.307	-0.922	-125.08	0.321	-0.78	0.318	-1.08
345	0.309	-0.922	-125.28	-0.863	-119.38	0.322	-0.88
350	0.307	0.281	-4.78	-0.861	-118.98	0.317	-1.18
355	0.308	0.287	-4.28	-0.862	-119.18	0.322	-0.78
360	0.305	0.292	-3.48	0.298	-2.88	0.323	-0.38
365	0.31	0.296	-3.58	0.298	-3.38	0.321	-1.08
370	0.308	0.3	-2.98	0.301	-2.88	0.324	-0.58
375	0.307	0.303	-2.58	0.303	-2.58	0.323	-0.58
380	0.309	0.305	-2.58	0.307	-2.38	0.326	-0.48
385	0.308	0.309	-2.08	0.311	-1.88	-0.875	-120.48
390	0.308	0.311	-1.88	0.313	-1.68	-0.875	-120.48
395	0.311	0.314	-1.88	0.318	-1.48	-0.874	-120.68
400	0.309	0.318	-1.28	0.322	-0.88	0.295	-3.58
405	0.309	0.321	-0.98	0.326	-0.48	0.29	-4.08
410	0.308	0.323	-0.68	0.327	-0.28	0.289	-4.08
415	0.308	0.327	-0.28	0.33	0.02	0.289	-4.08
420	0.308	0.332	0.22	0.335	0.52	0.291	-3.88
425	0.311	0.332	-0.08	0.338	0.52	0.294	-3.88
430	0.312	0.336	0.22	0.341	0.72	0.297	-3.68
435	0.311	0.339	0.62	0.343	1.02	0.3	-3.28
440	0.31	0.342	1.02	0.349	1.72	0.304	-2.78
445	0.31	0.343	1.12	0.349	1.72	0.305	-2.68
450	0.31	0.349	1.72	0.353	2.12	0.309	-2.28
455	0.311	0.35	1.72	0.356	2.32	0.313	-1.98
460	0.311	0.355	2.22	0.36	2.72	0.316	-1.68
465	0.31	0.356	2.42	0.363	3.12	0.32	-1.18
470	0.31	0.359	2.72	0.364	3.22	0.325	-0.68
475	0.307	0.364	3.52	0.371	4.22	0.327	-0.18
480	0.31	0.365	3.32	0.372	4.02	0.328	-0.38
485	0.31	0.364	3.22	0.372	4.02	0.335	0.32
490	0.312	0.37	3.62	0.375	4.12	0.337	0.32
495	0.31	0.375	4.32	0.381	4.92	0.339	0.72
500	0.309	0.374	4.32	0.381	5.02	0.343	1.22
505	0.309	0.38	4.92	0.384	5.32	0.344	1.32
510	0.311	0.381	4.82	0.389	5.62	0.348	1.52
515	0.312	0.384	5.02	0.39	5.62	0.352	1.82
520	0.309	0.389	5.82	0.392	6.12	0.355	2.42
525	0.308	0.39	6.02	0.395	6.52	0.357	2.72
530	0.31	0.39	5.82	0.4	6.82	0.36	2.82
535	0.311	0.397	6.42	0.404	7.12	0.362	2.92
540	0.311	0.397	6.42	0.402	6.92	0.365	3.22
545	0.309	0.398	6.72	0.408	7.72	0.368	3.72
550	0.309	0.402	7.12	0.411	8.02	0.372	4.12
555	0.307	0.4	7.12	0.413	8.42	0.374	4.52
560	0.308	0.406	7.62	0.419	8.92	0.377	4.72
565	0.307	0.408	7.92	0.42	9.12	0.381	5.22
570	0.307	0.408	7.92	0.422	9.32	0.382	5.32
575	0.308	0.41	8.02	0.428	9.82	0.385	5.52
580	0.306	0.41	8.22	0.433	10.52	0.39	6.22
585	0.306	0.414	8.62	0.43	10.22	0.392	6.42
590	0.308	0.42	9.02	0.433	10.32	0.395	6.52
595	0.308	0.42	9.02	0.439	10.92	0.399	6.92
600	0.308	0.424	9.42	0.443	11.32	0.405	7.52
605	0.308	0.423	9.32	0.445	11.52	0.407	7.72
610	0.307	0.427	9.82	0.447	11.82	0.407	7.82
615	0.307	0.427	9.82	0.449	12.02	0.411	8.22
620	0.305	0.432	10.52	0.454	12.72	0.414	8.72
625	0.306	0.432	10.42	0.46	13.22	0.417	8.92
630	0.307	0.435	10.62	0.463	13.42	0.422	9.32
635	0.305	0.437	11.02	0.467	14.02	0.421	9.42
640	0.304	0.437	11.12	0.468	14.22	0.427	10.12
645	0.305	0.438	11.12	0.47	14.32	0.425	9.82
650	0.306	0.444	11.62	0.472	14.42	0.431	10.32
655	0.301	0.442	11.92	0.477	15.42	0.431	10.82
660	0.303	0.446	12.12	0.479	15.42	0.435	11.02
665	0.301	0.445	12.22	0.483	16.02	0.436	11.32
670	0.302	0.448	12.42	0.486	16.22	0.438	11.42
675	0.302	0.454	13.02	0.487	16.32	0.442	11.82
680	0.302	0.452	12.82	0.491	16.72	0.441	11.72
685	0.304	0.458	13.22	0.491	16.52	0.444	11.82
690	0.301	0.457	13.42	0.497	17.42	0.448	12.52
695	0.301	0.459	13.62	0.497	17.42	0.449	12.62
700	0.301	0.461	13.82	0.498	17.52	0.45	12.72
705	0.301	0.465	14.22	0.504	18.12	0.449	12.62
710	0.303	0.467	14.22	0.504	17.92	0.453	12.82
715	0.302	0.468	14.42	0.508	18.42	0.452	12.82
720	0.302	0.466	14.22	0.51	18.62	0.456	13.22
725	0.303	0.47	14.52	0.514	18.92	0.459	13.42
730	0.299	0.471	15.02	0.514	19.32	0.459	13.82
735	0.3	0.475	15.32	0.514	19.22	0.46	13.82
740	0.302	0.476	15.22	0.517	19.32	0.461	13.72
745	0.301	0.476	15.32	0.516	19.32	0.463	14.02
750	0.302	0.478	15.42	0.522	19.82	0.463	13.92
755	0.299	0.482	16.12	0.522	20.12	0.465	14.42
760	0.301	0.479	15.62	0.524	20.12	0.469	14.62
765	0.3	0.479	15.72	0.526	20.42	0.469	14.72
770	0.299	0.485	16.42	0.529	20.82	0.469	14.82
775	0.303	0.487	16.22	0.529	20.42	0.473	14.82
780	0.299	0.487	16.62	0.53	20.92	0.474	15.32
785	0.3	0.489	16.72	0.532	21.02	0.476	15.42
790	0.3	0.489	16.72	0.535	21.32	0.479	15.72
795	0.3	0.49	16.82	0.536	21.42	0.477	15.52
800	0.302	0.49	16.62	0.537	21.32	0.48	15.62
805	0.299	0.491	17.02	0.538	21.72	0.48	15.92
810	0.301	0.493	17.02	0.539	21.62	0.482	15.92
815	0.3	0.498	17.62	0.542	22.02	0.484	16.22
820	0.299	0.496	17.52	0.546	22.52	0.481	16.02
825	0.297	0.497	17.82	0.545	22.62	0.483	16.42
830	0.299	0.5	17.92	0.546	22.52	0.484	16.32
835	0.299	0.499	17.82	0.545	22.42	0.487	16.62
840	0.298	0.502	18.22	0.549	22.92	0.485	16.52
845	0.3	0.502	18.02	0.552	23.02	0.489	16.72
850	0.298	0.499	17.92	0.553	23.32	0.488	16.82
855	0.297	0.502	18.32	0.551	23.22	0.494	17.52
860	0.3	0.506	18.42	0.553	23.12	0.493	17.12
865	0.298	0.504	18.42	0.556	23.62	0.493	17.32
870	0.3	0.504	18.22	0.557	23.52	0.496	17.42
875	0.298	0.504	18.42	0.559	23.92	0.495	17.52
880	0.298	0.51	19.02	0.56	24.02	0.499	17.92
885	0.297	0.509	19.02	0.556	23.72	0.499	18.02
890	0.301	0.509	18.62	0.559	23.62	0.497	17.42
895	0.298	0.512	19.22	0.559	23.92	0.503	18.32
900	0.298	0.514	19.42	0.564	24.42	0.503	18.32
905	0.298	0.514	19.42	0.566	24.62	0.502	18.22
910	0.298	0.514	19.42	0.565	24.52	0.504	18.42
915	0.297	0.516	19.72	0.566	24.72	0.509	19.02
920	0.296	0.521	20.32	0.568	25.02	0.507	18.92
925	0.297	0.518	19.92	0.568	24.92	0.508	18.92
930	0.296	0.519	20.12	0.571	25.32	0.51	19.22
935	0.297	0.518	19.92	0.569	25.02	0.51	19.12
940	0.296	0.517	19.92	0.572	25.42	0.511	19.32
945	0.297	0.522	20.32	0.573	25.42	0.51	19.12
950	0.299	0.523	20.22	0.572	25.12	0.514	19.32
955	0.298	0.522	20.22	0.575	25.52	0.514	19.42
960	0.298	0.523	20.32	0.576	25.62	0.516	19.62
965	0.297	0.523	20.42	0.576	25.72	0.517	19.82
970	0.298	0.522	20.22	0.575	25.52	0.518	19.82
975	0.295	0.525	20.82	0.577	26.02	0.517	20.02
980	0.3	0.525	20.32	0.577	25.52	0.521	19.92
985	0.295	0.524	20.72	0.579	26.22	0.522	20.52
990	0.296	0.529	21.12	0.577	25.92	0.522	20.42
995	0.297	0.528	20.92	0.581	26.22	0.522	20.32
1000	0.296	0.527	20.92	0.581	26.32	0.523	20.52
1005	0.295	0.526	20.92	0.582	26.52	0.522	20.52
1010	0.296	0.529	21.12	0.582	26.42	0.527	20.92
1015	0.296	0.526	20.82	0.584	26.62	0.523	20.52
1020	0.296	0.532	21.42	0.58	26.22	0.523	20.52
1025	0.295	0.53	21.32	0.582	26.52	0.526	20.92
1030	0.295	0.533	21.62	0.584	26.72	0.527	21.02
1035	0.295	0.532	21.52	0.585	26.82	0.529	21.22
1040	0.294	0.535	21.92	0.582	26.62	0.528	21.22
1045	0.296	0.533	21.52	0.587	26.92	0.526	20.82
1050	0.292	0.534	22.02	0.586	27.22	0.53	21.62
1055	0.294	0.536	22.02	0.587	27.12	0.53	21.42
1060	0.293	0.538	22.32	0.581	26.62	0.529	21.42
1065	0.295	0.538	22.12	0.587	27.02	0.532	21.52
1070	0.293	0.539	22.42	0.592	27.72	0.532	21.72
1075	0.294	0.537	22.12	0.586	27.02	0.532	21.62
1080	0.293	0.538	22.32	0.589	27.42	0.535	22.02
1085	0.294	0.537	22.12	0.589	27.32	0.536	22.02
1090	0.294	0.541	22.52	0.592	27.62	0.534	21.82
1095	0.295	0.539	22.22	0.59	27.32	0.534	21.72
1100	0.293	0.543	22.82	0.592	27.72	0.538	22.32
1105	0.293	0.539	22.42	0.592	27.72	0.534	21.92
1110	0.294	0.549	23.32	0.596	28.02	0.538	22.22
1115	0.293	0.546	23.12	0.59	27.52	0.536	22.12
1120	0.291	0.544	23.12	0.595	28.22	0.539	22.62
1125	0.295	0.545	22.82	0.606	28.92	0.535	21.82
1130	0.294	0.548	23.22	0.593	27.72	0.538	22.22
1135	0.294	0.546	23.02	0.596	28.02	0.539	22.32
1140	0.294	0.546	23.02	0.593	27.72	0.54	22.42
1145	0.293	0.549	23.42	0.597	28.22	0.541	22.62
1150	0.294	0.551	23.52	0.598	28.22	0.538	22.22
1155	0.294	0.553	23.72	0.595	27.92	0.542	22.62
1160	0.292	0.548	23.42	0.596	28.22	0.54	22.62
1165	0.294	0.551	23.52	0.597	28.12	0.544	22.82
1170	0.29	0.549	23.72	0.599	28.72	0.541	22.92
1175	0.292	0.556	24.22	0.597	28.32	0.543	22.92
1180	0.294	0.554	23.82	0.601	28.52	0.542	22.62
1185	0.293	0.555	24.02	0.602	28.72	0.542	22.72
1190	0.295	0.557	24.02	0.601	28.42	0.546	22.92
1195	0.292	0.556	24.22	0.603	28.92	0.545	23.12
1200	0.293	0.558	24.32	0.601	28.62	0.541	22.62
1205	0.293	0.562	24.72	0.604	28.92	0.545	23.02
1210	0.292	0.559	24.52	0.602	28.82	0.546	23.22
1215	0.292	0.554	24.02	0.604	29.02	0.544	23.02
1220	0.294	0.558	24.22	0.609	29.32	0.547	23.12
1225	0.293	0.558	24.32	0.606	29.12	0.547	23.22
1230	0.291	0.557	24.42	0.608	29.52	0.546	23.32
1235	0.292	0.56	24.62	0.605	29.12	0.547	23.32
1240	0.294	0.559	24.32	0.61	29.42	0.547	23.12
1245	0.293	0.558	24.32	0.608	29.32	0.547	23.22
1250	0.294	0.559	24.32	0.606	29.02	0.547	23.12
1255	0.291	0.562	24.92	0.612	29.92	0.55	23.72
1260	0.294	0.56	24.42	0.609	29.32	0.549	23.32
1265	0.293	0.565	25.02	0.608	29.32	0.548	23.32
1270	0.293	0.565	25.02	0.608	29.32	0.549	23.42
1275	0.294	0.567	25.12	0.61	29.42	0.554	23.82
1280	0.294	0.564	24.82	0.613	29.72	0.551	23.52
1285	0.292	0.565	25.12	0.609	29.52	0.55	23.62
1290	0.292	0.565	25.12	0.61	29.62	0.548	23.42
1295	0.295	0.569	25.22	0.614	29.72	0.553	23.62
1300	0.292	0.564	25.02	0.616	30.22	0.551	23.72
1305	0.29	0.571	25.92	0.616	30.42	0.553	24.12
1310	0.293	0.564	24.92	0.616	30.12	0.55	23.52
1315	0.292	0.568	25.42	0.614	30.02	0.552	23.82
1320	0.294	0.568	25.22	0.615	29.92	0.554	23.82
1325	0.292	0.57	25.62	0.618	30.42	0.551	23.72
1330	0.294	0.566	25.02	0.615	29.92	0.553	23.72
1335	0.294	0.571	25.52	0.613	29.72	0.553	23.72
1340	0.294	0.566	25.02	0.621	30.52	0.557	24.12
1345	0.291	0.569	25.62	0.619	30.62	0.553	24.02
1350	0.296	0.569	25.12	0.62	30.22	0.557	23.92
1355	0.301	0.568	24.52	0.619	29.62	0.555	23.22
1360	0.292	0.568	25.42	0.616	30.22	0.556	24.22
1365	0.292	0.573	25.92	0.621	30.72	0.556	24.22
1370	0.293	0.571	25.62	0.619	30.42	0.554	23.92
1375	0.294	0.57	25.42	0.618	30.22	0.557	24.12
1380	0.295	0.572	25.52	0.62	30.32	0.557	24.02
1385	0.294	0.571	25.52	0.622	30.62	0.556	24.02
1390	0.293	0.566	25.12	0.624	30.92	0.556	24.12
1395	0.293	0.571	25.62	0.626	31.12	0.556	24.12
1400	0.295	0.571	25.42	0.626	30.92	0.562	24.52
1405	0.293	0.568	25.32	0.623	30.82	0.561	24.62
1410	0.294	0.575	25.92	0.626	31.02	0.559	24.32
1415	0.294	0.572	25.62	0.625	30.92	0.561	24.52
1420	0.293	0.574	25.92	0.626	31.12	0.562	24.72
1425	0.292	0.573	25.92	0.627	31.32	0.56	24.62
1430	0.291	0.577	26.42	0.627	31.42	0.563	25.02
1435	0.294	0.575	25.92	0.629	31.32	0.563	24.72
1440	0.294	0.575	25.92	0.628	31.22	0.564	24.82
1445	0.292	0.578	26.42	0.627	31.32	0.563	24.92
1450	0.295	0.58	26.32	0.627	31.02	0.561	24.42
1455	0.292	0.579	26.52	0.629	31.52	0.566	25.22
1460	0.293	0.58	26.52	0.629	31.42	0.563	24.82
1465	0.293	0.58	26.52	0.63	31.52	0.565	25.02
1470	0.293	0.578	26.32	0.63	31.52	0.566	25.12
1475	0.296	0.577	25.92	0.632	31.42	0.563	24.52
1480	0.294	0.58	26.42	0.632	31.62	0.569	25.32
1485	0.295	0.579	26.22	0.63	31.32	0.568	25.12
1490	0.294	0.581	26.52	0.635	31.92	0.566	25.02
1495	0.293	0.581	26.62	0.636	32.12	0.568	25.32
1500	0.295	0.579	26.22	0.633	31.62	0.568	25.12
1505	0.295	0.581	26.42	0.636	31.92	0.566	24.92
1510	0.294	0.583	26.72	0.633	31.72	0.57	25.42
1515	0.296	0.584	26.62	0.631	31.32	0.569	25.12
1520	0.294	0.583	26.72	0.637	32.12	0.57	25.42
1525	0.293	0.581	26.62	0.637	32.22	0.57	25.52
1530	0.294	0.585	26.92	0.634	31.82	0.571	25.52
1535	0.293	0.58	26.52	0.634	31.92	0.569	25.42
1540	0.294	0.584	26.82	0.638	32.22	0.572	25.62
1545	0.293	0.586	27.12	0.637	32.22	0.576	26.12
1550	0.296	0.584	26.62	0.637	31.92	0.57	25.22
1555	0.296	0.588	27.02	0.63	31.22	0.573	25.52
1560	0.296	0.595	27.72	0.644	32.62	0.572	25.42
1565	0.295	0.591	27.42	0.641	32.42	0.575	25.82
1570	0.296	0.588	27.02	0.641	32.32	0.573	25.52
1575	0.298	0.585	26.52	0.637	31.72	0.575	25.52
1580	0.296	0.593	27.52	0.637	31.92	0.576	25.82
1585	0.298	0.593	27.32	0.643	32.32	0.576	25.62
1590	0.294	0.591	27.52	0.643	32.72	0.576	26.02
1595	0.295	0.591	27.42	0.645	32.82	0.576	25.92
1600	0.296	0.595	27.72	0.642	32.42	0.581	26.32
1605	0.296	0.593	27.52	0.643	32.52	0.578	26.02
1610	0.297	0.591	27.22	0.644	32.52	0.577	25.82
1615	0.297	0.591	27.22	0.647	32.82	0.58	26.12
1620	0.296	0.595	27.72	0.648	33.02	0.581	26.32
1625	0.296	0.593	27.52	0.646	32.82	0.58	26.22
1630	0.296	0.595	27.72	0.644	32.62	0.581	26.32
1635	0.296	0.597	27.92	0.65	33.22	0.58	26.22
1640	0.296	0.593	27.52	0.646	32.82	0.582	26.42
1645	0.296	0.594	27.62	0.648	33.02	0.58	26.22
1650	0.296	0.597	27.92	0.648	33.02	0.582	26.42
1655	0.294	0.593	27.72	0.645	32.92	0.583	26.72
1660	0.298	0.597	27.72	0.645	32.52	0.583	26.32
1665	0.296	0.598	28.02	0.648	33.02	0.584	26.62
1670	0.296	0.596	27.82	0.653	33.52	0.583	26.52
1675	0.296	0.595	27.72	0.652	33.42	0.584	26.62
1680	0.295	0.598	28.12	0.652	33.52	0.586	26.92
1685	0.296	0.599	28.12	0.653	33.52	0.584	26.62
1690	0.298	0.599	27.92	0.657	33.72	0.588	26.82
1695	0.298	0.602	28.22	0.655	33.52	0.587	26.72
1700	0.296	0.598	28.02	0.653	33.52	0.588	27.02
1705	0.297	0.601	28.22	0.65	33.12	0.589	27.02
1710	0.295	0.597	28.02	0.654	33.72	0.587	27.02
1715	0.296	0.601	28.32	0.65	33.22	0.59	27.22
1720	0.296	0.601	28.32	0.651	33.32	0.588	27.02
1725	0.297	0.605	28.62	0.657	33.82	0.591	27.22
1730	0.298	0.601	28.12	0.654	33.42	0.589	26.92
1735	0.297	0.604	28.52	0.655	33.62	0.59	27.12
1740	0.295	0.603	28.62	0.656	33.92	0.589	27.22
1745	0.297	0.604	28.52	0.66	34.12	0.594	27.52
1750	0.299	0.603	28.22	0.66	33.92	0.589	26.82
1755	0.298	0.601	28.12	0.66	34.02	0.594	27.42
1760	0.296	0.607	28.92	0.658	34.02	0.592	27.42
1765	0.298	0.604	28.42	0.664	34.42	0.597	27.72
1770	0.298	0.605	28.52	0.661	34.12	0.595	27.52
1775	0.299	0.608	28.72	0.656	33.52	0.596	27.52
1780	0.299	0.608	28.72	0.664	34.32	0.598	27.72
1785	0.298	0.602	28.22	0.663	34.32	0.595	27.52
1790	0.297	0.607	28.82	0.663	34.42	0.598	27.92
1795	0.296	0.608	29.02	0.661	34.32	0.597	27.92
1800	0.298	0.608	28.82	0.661	34.12	0.599	27.92

## Sheet: 10000Tu_Mo
Time (sec)	BG_OD360	1st_OD360	1st_ΔPi con. (μM)	2nd_OD360	2nd_ΔPi con. (μM)	3rd_OD360	3rd_ΔPi con. (μM)
	-0.029	-0.034		-0.02		-0.03
5	-0.014	-0.016	-2.38	-0.008	-1.58	-0.012	-1.98
10	-0.003	-0.005	-2.38	0.005	-1.38	-0.002	-2.08
15	0.007	0.012	-1.68	0.018	-1.08	0.009	-1.98
20	0.016	0.023	-1.48	0.031	-0.68	0.021	-1.68
25	0.026	0.031	-1.68	0.045	-0.28	0.032	-1.58
30	0.034	0.041	-1.48	0.055	-0.08	0.04	-1.58
35	0.044	0.055	-1.08	0.069	0.32	0.05	-1.58
40	0.053	0.062	-1.28	0.08	0.52	0.058	-1.68
45	0.059	0.07	-1.08	0.088	0.72	0.066	-1.48
50	0.073	0.077	-1.78	0.099	0.42	0.077	-1.78
55	0.08	0.085	-1.68	0.108	0.62	0.084	-1.78
60	0.089	0.092	-1.88	0.117	0.62	0.09	-2.08
65	0.098	0.1	-1.98	0.124	0.42	0.099	-2.08
70	0.106	0.106	-2.18	0.134	0.62	0.105	-2.28
75	0.113	0.111	-2.38	0.139	0.42	0.112	-2.28
80	0.119	0.118	-2.28	0.149	0.82	0.118	-2.28
85	0.13	0.125	-2.68	0.154	0.22	0.122	-2.98
90	0.137	0.129	-2.98	0.159	0.02	0.129	-2.98
95	0.142	0.133	-3.08	0.162	-0.18	0.132	-3.18
100	0.149	0.139	-3.18	0.169	-0.18	0.138	-3.28
105	0.155	0.141	-3.58	0.177	0.02	0.144	-3.28
110	0.161	0.149	-3.38	0.182	-0.08	0.147	-3.58
115	0.168	0.153	-3.68	0.183	-0.68	0.151	-3.88
120	0.173	0.153	-4.18	0.19	-0.48	0.155	-3.98
125	0.178	0.158	-4.18	0.195	-0.48	0.159	-4.08
130	0.182	0.163	-4.08	0.197	-0.68	0.162	-4.18
135	0.188	0.165	-4.48	0.202	-0.78	0.166	-4.38
140	0.193	0.165	-4.98	0.206	-0.88	0.171	-4.38
145	0.195	0.171	-4.58	0.209	-0.78	0.173	-4.38
150	0.201	0.172	-5.08	0.211	-1.18	0.177	-4.58
155	0.205	0.174	-5.28	0.215	-1.18	0.18	-4.68
160	0.209	0.177	-5.38	0.22	-1.08	0.182	-4.88
165	0.21	0.18	-5.18	0.223	-0.88	0.185	-4.68
170	0.215	0.181	-5.58	0.226	-1.08	0.189	-4.78
175	0.218	0.185	-5.48	0.227	-1.28	0.19	-4.98
180	0.22	0.19	-5.18	0.233	-0.88	0.191	-5.08
185	0.224	0.185	-6.08	0.234	-1.18	0.195	-5.08
190	0.226	0.189	-5.88	0.237	-1.08	0.197	-5.08
195	0.229	0.191	-5.98	0.238	-1.28	0.201	-4.98
200	0.233	0.192	-6.28	0.238	-1.68	0.201	-5.38
205	0.234	0.194	-6.18	0.241	-1.48	0.204	-5.18
210	0.236	0.194	-6.38	0.244	-1.38	0.208	-4.98
215	0.239	0.196	-6.48	0.247	-1.38	0.209	-5.18
220	0.24	0.197	-6.48	0.247	-1.48	0.211	-5.08
225	0.243	0.202	-6.28	0.249	-1.58	0.214	-5.08
230	0.245	0.201	-6.58	0.25	-1.68	0.213	-5.38
235	0.248	0.199	-7.08	0.255	-1.48	0.214	-5.58
240	0.248	0.205	-6.48	0.259	-1.08	0.216	-5.38
245	0.252	0.207	-6.68	0.257	-1.68	0.219	-5.48
250	0.253	0.208	-6.68	0.261	-1.38	0.223	-5.18
255	0.255	0.211	-6.58	0.262	-1.48	0.222	-5.48
260	0.258	0.208	-7.18	0.26	-1.98	0.221	-5.88
265	0.257	0.209	-6.98	0.261	-1.78	0.223	-5.58
270	0.26	0.21	-7.18	0.264	-1.78	0.226	-5.58
275	0.259	0.211	-6.98	0.266	-1.48	0.227	-5.38
280	0.261	0.215	-6.78	0.27	-1.28	0.229	-5.38
285	0.263	0.215	-6.98	0.267	-1.78	0.23	-5.48
290	0.266	0.216	-7.18	0.269	-1.88	0.231	-5.68
295	0.266	0.218	-6.98	0.273	-1.48	0.232	-5.58
300	0.266	0.215	-7.28	0.274	-1.38	0.233	-5.48
305	0.268	0.223	-6.68	0.271	-1.88	0.235	-5.48
310	0.266	0.22	-6.78	0.272	-1.58	0.235	-5.28
315	0.268	0.22	-6.98	0.273	-1.68	0.239	-5.08
320	0.271	0.22	-7.28	0.277	-1.58	0.237	-5.58
325	0.27	0.22	-7.18	0.277	-1.48	0.241	-5.08
330	0.273	0.224	-7.08	0.275	-1.98	0.239	-5.58
335	0.273	-1.189	-148.38	-0.97	-126.48	0.243	-5.18
340	0.275	-1.19	-148.68	-0.971	-126.78	0.242	-5.48
345	0.275	0.187	-10.98	-0.971	-126.78	0.241	-5.58
350	0.276	0.197	-10.08	0.248	-4.98	0.245	-5.28
355	0.276	0.202	-9.58	0.262	-3.58	0.246	-5.18
360	0.277	0.208	-9.08	0.273	-2.58	0.247	-5.18
365	0.277	0.213	-8.58	0.288	-1.08	0.249	-4.98
370	0.279	0.223	-7.78	0.299	-0.18	0.248	-5.28
375	0.276	0.226	-7.18	0.313	1.52	0.252	-4.58
380	0.279	0.232	-6.88	0.326	2.52	0.251	-4.98
385	0.282	0.237	-6.68	0.34	3.62	0.25	-5.38
390	0.28	0.248	-5.38	0.352	5.02	0.253	-4.88
395	0.282	0.253	-5.08	0.364	6.02	0.252	-5.18
400	0.279	0.259	-4.18	0.378	7.72	0.255	-4.58
405	0.28	0.264	-3.78	0.385	8.32	-1.007	-130.88
410	0.279	0.273	-2.78	0.4	9.92	-1.005	-130.58
415	0.281	0.279	-2.38	0.409	10.62	0.209	-9.38
420	0.282	0.284	-1.98	0.422	11.82	0.225	-7.88
425	0.281	0.288	-1.48	0.427	12.42	0.236	-6.68
430	0.284	0.295	-1.08	0.438	13.22	0.247	-5.88
435	0.28	0.304	0.22	0.448	14.62	0.258	-4.38
440	0.282	0.307	0.32	0.454	15.02	0.269	-3.48
445	0.283	0.306	0.12	0.463	15.82	0.277	-2.78
450	0.282	0.316	1.22	0.467	16.32	0.288	-1.58
455	0.282	0.323	1.92	0.477	17.32	0.293	-1.08
460	0.284	0.329	2.32	0.481	17.52	0.299	-0.68
465	0.284	0.329	2.32	0.486	18.02	0.309	0.32
470	0.285	0.337	3.02	0.491	18.42	0.32	1.32
475	0.287	0.341	3.22	0.498	18.92	0.323	1.42
480	0.285	0.343	3.62	0.506	19.92	0.335	2.82
485	0.285	0.344	3.72	0.511	20.42	0.342	3.52
490	0.284	0.346	4.02	0.519	21.32	0.348	4.22
495	0.283	0.355	5.02	0.52	21.52	0.355	5.02
500	0.28	0.357	5.52	0.528	22.62	0.362	6.02
505	0.284	0.359	5.32	0.526	22.02	0.369	6.32
510	0.281	0.361	5.82	0.533	23.02	0.378	7.52
515	0.284	0.366	6.02	0.535	22.92	0.382	7.62
520	0.283	0.37	6.52	0.537	23.22	0.388	8.32
525	0.282	0.373	6.92	0.547	24.32	0.394	9.02
530	0.284	0.377	7.12	0.546	24.02	0.398	9.22
535	0.284	0.375	6.92	0.551	24.52	0.409	10.32
540	0.283	0.378	7.32	0.553	24.82	0.415	11.02
545	0.284	0.377	7.12	0.558	25.22	0.421	11.52
550	0.282	0.376	7.22	0.559	25.52	0.425	12.12
555	0.281	0.385	8.22	0.563	26.02	0.429	12.62
560	0.282	0.389	8.52	0.565	26.12	0.433	12.92
565	0.284	0.389	8.32	0.566	26.02	0.442	13.62
570	0.281	0.386	8.32	0.568	26.52	0.444	14.12
575	0.281	0.391	8.82	0.577	27.42	0.45	14.72
580	0.282	0.398	9.42	0.576	27.22	0.454	15.02
585	0.282	0.399	9.52	0.578	27.42	0.456	15.22
590	0.277	0.397	9.82	0.577	27.82	0.464	16.52
595	0.278	0.398	9.82	0.58	28.02	0.465	16.52
600	0.277	0.403	10.42	0.582	28.32	0.465	16.62
605	0.277	0.402	10.32	0.587	28.82	0.471	17.22
610	0.276	0.404	10.62	0.585	28.72	0.475	17.72
615	0.276	0.404	10.62	0.582	28.42	0.481	18.32
620	0.275	0.401	10.42	0.592	29.52	0.49	19.32
625	0.274	0.409	11.32	0.593	29.72	0.488	19.22
630	0.273	0.41	11.52	0.593	29.82	0.488	19.32
635	0.277	0.412	11.32	0.598	29.92	0.491	19.22
640	0.276	0.406	10.82	0.6	30.22	0.498	20.02
645	0.278	0.42	12.02	0.597	29.72	0.504	20.42
650	0.276	0.415	11.72	0.596	29.82	0.501	20.32
655	0.277	0.413	11.42	0.604	30.52	0.507	20.82
660	0.275	0.412	11.52	0.605	30.82	0.511	21.42
665	0.277	0.419	12.02	0.606	30.72	0.513	21.42
670	0.273	0.415	12.02	0.604	30.92	0.516	22.12
675	0.275	0.416	11.92	0.606	30.92	0.515	21.82
680	0.274	0.421	12.52	0.61	31.42	0.519	22.32
685	0.272	0.42	12.62	0.611	31.72	0.519	22.52
690	0.271	0.422	12.92	0.612	31.92	0.52	22.72
695	0.272	0.428	13.42	0.613	31.92	0.522	22.82
700	0.273	0.423	12.82	0.617	32.22	0.527	23.22
705	0.274	0.426	13.02	0.614	31.82	0.525	22.92
710	0.271	0.427	13.42	0.615	32.22	0.526	23.32
715	0.275	0.426	12.92	0.618	32.12	0.531	23.42
720	0.273	0.433	13.82	0.614	31.92	0.534	23.92
725	0.275	0.428	13.12	0.619	32.22	0.536	23.92
730	0.273	0.432	13.72	0.62	32.52	0.537	24.22
735	0.273	0.437	14.22	0.617	32.22	0.54	24.52
740	0.27	0.426	13.42	0.619	32.72	0.535	24.32
745	0.271	0.438	14.52	0.623	33.02	0.542	24.92
750	0.271	0.433	14.02	0.618	32.52	0.541	24.82
755	0.271	0.436	14.32	0.621	32.82	0.542	24.92
760	0.271	0.436	14.32	0.625	33.22	0.541	24.82
765	0.268	0.438	14.82	0.623	33.32	0.548	25.82
770	0.268	0.434	14.42	0.627	33.72	0.548	25.82
775	0.268	0.432	14.22	0.628	33.82	0.548	25.82
780	0.271	0.439	14.62	0.626	33.32	0.552	25.92
785	0.27	0.441	14.92	0.63	33.82	0.551	25.92
790	0.27	0.441	14.92	0.63	33.82	0.555	26.32
795	0.269	0.44	14.92	0.629	33.82	0.551	26.02
800	0.269	0.439	14.82	0.633	34.22	0.557	26.62
805	0.267	0.439	15.02	0.63	34.12	0.558	26.92
810	0.268	0.446	15.62	0.633	34.32	0.559	26.92
815	0.269	0.442	15.12	0.633	34.22	0.559	26.82
820	0.268	0.441	15.12	0.636	34.62	0.562	27.22
825	0.263	0.437	15.22	0.633	34.82	0.558	27.32
830	0.266	0.444	15.62	0.632	34.42	0.562	27.42
835	0.267	0.44	15.12	0.638	34.92	0.564	27.52
840	0.265	0.446	15.92	0.638	35.12	0.569	28.22
845	0.266	0.445	15.72	0.635	34.72	0.565	27.72
850	0.265	0.444	15.72	0.638	35.12	0.571	28.42
855	0.268	0.445	15.52	0.638	34.82	0.566	27.62
860	0.265	0.448	16.12	0.639	35.22	0.57	28.32
865	0.266	0.449	16.12	0.639	35.12	0.569	28.12
870	0.267	0.451	16.22	0.637	34.82	0.572	28.32
875	0.268	0.451	16.12	0.639	34.92	0.576	28.62
880	0.267	0.447	15.82	0.642	35.32	0.576	28.72
885	0.266	0.449	16.12	0.64	35.22	0.574	28.62
890	0.268	0.446	15.62	0.642	35.22	0.576	28.62
895	0.267	0.448	15.92	0.643	35.42	0.576	28.72
900	0.27	0.449	15.72	0.641	34.92	0.579	28.72
905	0.267	0.446	15.72	0.642	35.32	0.58	29.12
910	0.264	0.451	16.52	0.644	35.82	0.579	29.32
915	0.268	0.447	15.72	0.651	36.12	0.592	30.22
920	0.266	0.45	16.22	0.645	35.72	0.585	29.72
925	0.267	0.449	16.02	0.645	35.62	0.58	29.12
930	0.268	0.456	16.62	0.646	35.62	0.581	29.12
935	0.267	0.455	16.62	0.649	36.02	0.584	29.52
940	0.266	0.45	16.22	0.647	35.92	0.582	29.42
945	0.268	0.453	16.32	0.647	35.72	0.585	29.52
950	0.267	0.449	16.02	0.654	36.52	0.585	29.62
955	0.268	0.454	16.42	0.648	35.82	0.584	29.42
960	0.267	0.453	16.42	0.652	36.32	0.584	29.52
965	0.269	0.454	16.32	0.649	35.82	0.589	29.82
970	0.264	0.451	16.52	0.652	36.62	0.588	30.22
975	0.264	0.458	17.22	0.652	36.62	0.586	30.02
980	0.266	0.457	16.92	0.653	36.52	0.587	29.92
985	0.266	0.457	16.92	0.654	36.62	0.587	29.92
990	0.265	0.461	17.42	0.652	36.52	0.591	30.42
995	0.269	0.458	16.72	0.654	36.32	0.592	30.12
1000	0.265	0.462	17.52	0.652	36.52	0.593	30.62
1005	0.268	0.462	17.22	0.656	36.62	0.592	30.22
1010	0.267	0.462	17.32	0.657	36.82	0.588	29.92
1015	0.268	0.462	17.22	0.656	36.62	0.591	30.12
1020	0.268	0.456	16.62	0.655	36.52	0.589	29.92
1025	0.266	0.457	16.92	0.655	36.72	0.591	30.32
1030	0.264	0.463	17.72	0.655	36.92	0.595	30.92
1035	0.268	0.465	17.52	0.654	36.42	0.593	30.32
1040	0.268	0.466	17.62	0.661	37.12	0.595	30.52
1045	0.266	0.468	18.02	0.659	37.12	0.593	30.52
1050	0.267	0.463	17.42	0.66	37.12	0.595	30.62
1055	0.267	0.468	17.92	0.665	37.62	0.603	31.42
1060	0.269	0.467	17.62	0.659	36.82	0.604	31.32
1065	0.267	0.47	18.12	0.66	37.12	0.597	30.82
1070	0.266	0.467	17.92	0.663	37.52	0.596	30.82
1075	0.264	0.468	18.22	0.66	37.42	0.595	30.92
1080	0.267	0.471	18.22	0.667	37.82	0.596	30.72
1085	0.269	0.478	18.72	0.659	36.82	0.595	30.42
1090	0.269	0.469	17.82	0.666	37.52	0.597	30.62
1095	0.267	0.474	18.52	0.658	36.92	0.597	30.82
1100	0.266	0.473	18.52	0.666	37.82	0.599	31.12
1105	0.268	0.47	18.02	0.665	37.52	0.6	31.02
1110	0.267	0.47	18.12	0.665	37.62	0.607	31.82
1115	0.269	0.477	18.62	0.668	37.72	0.602	31.12
1120	0.268	0.474	18.42	0.665	37.52	0.601	31.12
1125	0.268	0.479	18.92	0.662	37.22	0.602	31.22
1130	0.267	0.476	18.72	0.671	38.22	0.596	30.72
1135	0.269	0.476	18.52	0.664	37.32	0.606	31.52
1140	0.267	0.481	19.22	0.67	38.12	0.607	31.82
1145	0.27	0.479	18.72	0.666	37.42	0.607	31.52
1150	0.269	0.473	18.22	0.669	37.82	0.596	30.52
1155	0.267	0.478	18.92	0.671	38.22	0.6	31.12
1160	0.269	0.48	18.92	0.666	37.52	0.607	31.62
1165	0.269	0.477	18.62	0.669	37.82	0.604	31.32
1170	0.27	0.478	18.62	0.671	37.92	0.602	31.02
1175	0.269	0.476	18.52	0.671	38.02	0.603	31.22
1180	0.27	0.487	19.52	0.673	38.12	0.606	31.42
1185	0.269	0.482	19.12	0.668	37.72	0.604	31.32
1190	0.268	0.481	19.12	0.672	38.22	0.604	31.42
1195	0.272	0.482	18.82	0.671	37.72	0.605	31.12
1200	0.272	0.478	18.42	0.668	37.42	0.607	31.32
1205	0.27	0.478	18.62	0.671	37.92	0.606	31.42
1210	0.267	0.486	19.72	0.68	39.12	0.606	31.72
1215	0.272	0.484	19.02	0.672	37.82	0.607	31.32
1220	0.267	0.489	20.02	0.676	38.72	0.607	31.82
1225	0.269	0.486	19.52	0.676	38.52	0.607	31.62
1230	0.267	0.489	20.02	0.676	38.72	0.611	32.22
1235	0.27	0.481	18.92	0.673	38.12	0.607	31.52
1240	0.27	0.485	19.32	0.676	38.42	0.608	31.62
1245	0.27	0.483	19.12	0.677	38.52	0.614	32.22
1250	0.27	0.484	19.22	0.681	38.92	0.615	32.32
1255	0.269	0.49	19.92	0.678	38.72	0.613	32.22
1260	0.273	0.489	19.42	0.682	38.72	0.617	32.22
1265	0.269	0.488	19.72	0.674	38.32	0.615	32.42
1270	0.272	0.489	19.52	0.683	38.92	0.616	32.22
1275	0.271	0.484	19.12	0.676	38.32	0.614	32.12
1280	0.274	0.487	19.12	0.683	38.72	0.61	31.42
1285	0.27	0.488	19.62	0.684	39.22	0.616	32.42
1290	0.271	0.49	19.72	0.68	38.72	0.618	32.52
1295	0.27	0.496	20.42	0.681	38.92	0.612	32.02
1300	0.269	0.49	19.92	0.676	38.52	0.614	32.32
1305	0.275	0.495	19.82	0.685	38.82	0.617	32.02
1310	0.272	0.499	20.52	0.686	39.22	0.621	32.72
1315	0.274	0.496	20.02	0.682	38.62	0.62	32.42
1320	0.271	0.488	19.52	0.687	39.42	0.616	32.32
1325	0.275	0.488	19.12	0.68	38.32	0.617	32.02
1330	0.269	0.491	20.02	0.686	39.52	0.623	33.22
1335	0.272	0.499	20.52	0.685	39.12	0.618	32.42
1340	0.272	0.494	20.02	0.692	39.82	0.62	32.62
1345	0.273	0.496	20.12	0.685	39.02	0.62	32.52
1350	0.274	0.495	19.92	0.687	39.12	0.616	32.02
1355	0.27	0.497	20.52	0.688	39.62	0.624	33.22
1360	0.273	0.497	20.22	0.688	39.32	0.621	32.62
1365	0.273	0.499	20.42	0.689	39.42	0.62	32.52
1370	0.272	0.491	19.72	0.686	39.22	0.623	32.92
1375	0.275	0.501	20.42	0.691	39.42	0.621	32.42
1380	0.272	0.495	20.12	0.689	39.52	0.624	33.02
1385	0.273	0.491	19.62	0.691	39.62	0.622	32.72
1390	0.269	0.497	20.62	0.693	40.22	0.625	33.42
1395	0.273	0.494	19.92	0.694	39.92	0.627	33.22
1400	0.275	0.5	20.32	0.691	39.42	0.627	33.02
1405	0.276	0.5	20.22	0.689	39.12	0.622	32.42
1410	0.272	0.501	20.72	0.682	38.82	0.622	32.82
1415	0.273	0.498	20.32	0.69	39.52	0.622	32.72
1420	0.27	0.506	21.42	0.688	39.62	0.624	33.22
1425	0.273	0.499	20.42	0.698	40.32	0.624	32.92
1430	0.273	0.511	21.62	0.698	40.32	0.622	32.72
1435	0.272	0.504	21.02	0.697	40.32	0.629	33.52
1440	0.273	0.505	21.02	0.693	39.82	0.623	32.82
1445	0.274	0.502	20.62	0.701	40.52	0.622	32.62
1450	0.276	0.503	20.52	0.699	40.12	0.624	32.62
1455	0.273	0.502	20.72	0.697	40.22	0.631	33.62
1460	0.275	0.508	21.12	0.7	40.32	0.627	33.02
1465	0.276	0.505	20.72	0.698	40.02	0.631	33.32
1470	0.278	0.506	20.62	0.697	39.72	0.629	32.92
1475	0.275	0.508	21.12	0.7	40.32	0.63	33.32
1480	0.276	0.507	20.92	0.696	39.82	0.628	33.02
1485	0.273	0.502	20.72	0.698	40.32	0.628	33.32
1490	0.277	0.504	20.52	0.696	39.72	0.63	33.12
1495	0.274	0.506	21.02	0.697	40.12	0.624	32.82
1500	0.274	0.516	22.02	0.699	40.32	0.632	33.62
1505	0.278	0.508	20.82	0.697	39.72	0.631	33.12
1510	0.278	0.509	20.92	0.696	39.62	0.626	32.62
1515	0.278	0.512	21.22	0.699	39.92	0.626	32.62
1520	0.277	0.507	20.82	0.701	40.22	0.631	33.22
1525	0.276	0.509	21.12	0.703	40.52	0.626	32.82
1530	0.275	0.509	21.22	0.706	40.92	0.632	33.52
1535	0.278	0.514	21.42	0.702	40.22	0.629	32.92
1540	0.276	0.508	21.02	0.708	41.02	0.627	32.92
1545	0.278	0.507	20.72	0.7	40.02	0.627	32.72
1550	0.276	0.504	20.62	0.705	40.72	0.631	33.32
1555	0.277	0.509	21.02	0.706	40.72	0.631	33.22
1560	0.277	0.511	21.22	0.703	40.42	0.632	33.32
1565	0.277	0.514	21.52	0.707	40.82	0.629	33.02
1570	0.275	0.513	21.62	0.703	40.62	0.633	33.62
1575	0.277	0.515	21.62	0.712	41.32	0.631	33.22
1580	0.279	0.506	20.52	0.703	40.22	0.628	32.72
1585	0.276	0.515	21.72	0.712	41.42	0.635	33.72
1590	0.277	0.507	20.82	0.707	40.82	0.636	33.72
1595	0.28	0.517	21.52	0.71	40.82	0.633	33.12
1600	0.279	0.515	21.42	0.704	40.32	0.636	33.52
1605	0.28	0.514	21.22	0.708	40.62	0.635	33.32
1610	0.282	0.517	21.32	0.705	40.12	0.632	32.82
1615	0.281	0.52	21.72	0.712	40.92	0.638	33.52
1620	0.28	0.515	21.32	0.707	40.52	0.632	33.02
1625	0.282	0.521	21.72	0.713	40.92	0.631	32.72
1630	0.278	0.52	22.02	0.705	40.52	0.635	33.52
1635	0.281	0.515	21.22	0.714	41.12	0.637	33.42
1640	0.28	0.521	21.92	0.706	40.42	0.636	33.42
1645	0.28	0.518	21.62	0.712	41.02	0.634	33.22
1650	0.281	0.52	21.72	0.713	41.02	0.637	33.42
1655	0.277	0.522	22.32	0.717	41.82	0.638	33.92
1660	0.28	0.522	22.02	0.708	40.62	0.638	33.62
1665	0.28	0.522	22.02	0.712	41.02	0.636	33.42
1670	0.28	0.519	21.72	0.714	41.22	0.64	33.82
1675	0.28	0.522	22.02	0.716	41.42	0.642	34.02
1680	0.282	0.524	22.02	0.718	41.42	0.635	33.12
1685	0.278	0.519	21.92	0.714	41.42	0.635	33.52
1690	0.283	0.52	21.52	0.718	41.32	0.64	33.52
1695	0.284	0.521	21.52	0.711	40.52	0.638	33.22
1700	0.279	0.522	22.12	0.718	41.72	0.642	34.12
1705	0.281	0.519	21.62	0.716	41.32	0.64	33.72
1710	0.283	0.523	21.82	0.72	41.52	0.647	34.22
1715	0.284	0.525	21.92	0.718	41.22	0.641	33.52
1720	0.281	0.524	22.12	0.712	40.92	0.636	33.32
1725	0.28	0.515	21.32	0.725	42.32	0.639	33.72
1730	0.283	0.525	22.02	0.716	41.12	0.642	33.72
1735	0.284	0.527	22.12	0.711	40.52	0.644	33.82
1740	0.281	0.529	22.62	0.716	41.32	0.638	33.52
1745	0.281	0.523	22.02	0.714	41.12	0.641	33.82
1750	0.284	0.524	21.82	0.723	41.72	0.64	33.42
1755	0.283	0.529	22.42	0.723	41.82	0.637	33.22
1760	0.284	0.522	21.62	0.716	41.02	0.639	33.32
1765	0.284	0.519	21.32	0.723	41.72	0.641	33.52
1770	0.294	0.531	21.52	0.716	40.02	0.646	33.02
1775	0.281	0.526	22.32	0.718	41.52	0.644	34.12
1780	0.284	0.522	21.62	0.726	42.02	0.641	33.52
1785	0.288	0.528	21.82	0.725	41.52	0.641	33.12
1790	0.284	0.525	21.92	0.724	41.82	0.642	33.62
1795	0.286	0.528	22.02	0.721	41.32	0.646	33.82
1800	0.282	0.526	22.22	0.725	42.12	0.646	34.22

## Sheet: result
KLP-12(M) + GTP-tubulin (Tu)
GTP-Tu (nM)	100	300	1000	3000	10000
ATPase rate ( /s), 1st	0.0044	0.017	0.0469	0.0566	0.1152
ATPase rate ( /s), 2nd	0.0027	0.0112	0.0437	0.0618	0.2402
ATPase rate ( /s), 3rd	0.0027	0.0113	0.0299	0.0623	0.1552
mean	0.00326667	0.0131667	0.0401667	0.0602333	0.1702
SD	0.000981495	0.00332014	0.00903401	0.00315647	0.0638357
