# Supplementary material for: Structural model of microtubule dynamics inhibition by kinesin-4 from the crystal structure of KLP-12 –tubulin complex
Source: eLife. 2022 Sep 6;11:e77877. doi: 10.7554/eLife.77877 (PMC9451533; doi:10.7554/eLife.77877)
Supplement: Figure 3—source data 3. [file elife-77877-fig3-data3.xlsx]

## Sheet: Pi standard
Pi Conc. (μM)	OD360
0	0
25	0.2537
50	0.5112
100	0.9484

## Sheet: 100Dtu_Mo
Time (sec)	BG_OD360	1st_OD360	1st_ΔPi con. (μM)	2nd_OD360	2nd_ΔPi con. (μM)	3rd_OD360	3rd_ΔPi con. (μM)
	0.077	0.087		0.068		0.085
5	0.094	0.1	-0.842105	0.082	-2.73684	0.103	-0.526316
10	0.108	0.114	-0.842105	0.099	-2.42105	0.119	-0.315789
15	0.121	0.126	-0.947368	0.108	-2.84211	0.132	-0.315789
20	0.136	0.14	-1.05263	0.123	-2.84211	0.145	-0.526316
25	0.148	0.153	-0.947368	0.136	-2.73684	0.16	-0.210526
30	0.161	0.167	-0.842105	0.149	-2.73684	0.172	-0.315789
35	0.171	0.174	-1.15789	0.16	-2.63158	0.185	-1.64342e-15
40	0.182	0.184	-1.26316	0.168	-2.94737	0.197	0.105263
45	0.19	0.193	-1.15789	0.178	-2.73684	0.207	0.315789
50	0.201	0.203	-1.26316	0.186	-3.05263	0.218	0.315789
55	0.209	0.211	-1.26316	0.197	-2.73684	0.227	0.421053
60	0.216	0.22	-1.05263	0.205	-2.63158	0.237	0.736842
65	0.222	0.226	-1.05263	0.212	-2.52632	0.246	1.05263
70	0.228	0.233	-0.947368	0.218	-2.52632	0.254	1.26316
75	0.233	0.238	-0.947368	0.225	-2.31579	0.263	1.68421
80	0.241	0.244	-1.15789	0.231	-2.52632	0.27	1.57895
85	0.247	0.25	-1.15789	0.238	-2.42105	0.277	1.68421
90	0.248	0.254	-0.842105	0.244	-1.89474	0.283	2.21053
95	0.253	0.26	-0.736842	0.249	-1.89474	0.288	2.21053
100	0.257	0.263	-0.842105	0.255	-1.68421	0.297	2.73684
105	0.26	0.266	-0.842105	0.257	-1.78947	0.299	2.63158
110	0.263	0.269	-0.842105	0.262	-1.57895	0.305	2.94737
115	0.266	0.275	-0.526316	0.264	-1.68421	0.312	3.36842
120	0.27	0.277	-0.736842	0.269	-1.57895	0.318	3.57895
125	0.272	0.277	-0.947368	0.271	-1.57895	0.322	3.78947
130	0.274	0.279	-0.947368	0.273	-1.57895	0.324	3.78947
135	0.274	0.282	-0.631579	0.277	-1.15789	0.329	4.31579
140	0.279	0.285	-0.842105	0.282	-1.15789	0.333	4.21053
145	0.278	0.287	-0.526316	0.282	-1.05263	0.336	4.63158
150	0.282	0.29	-0.631579	0.284	-1.26316	0.339	4.52632
155	0.28	0.291	-0.315789	0.287	-0.736842	0.34	4.84211
160	0.284	0.292	-0.631579	0.286	-1.26316	0.349	5.36842
165	0.285	0.294	-0.526316	0.288	-1.15789	0.347	5.05263
170	0.286	0.294	-0.631579	0.292	-0.842105	0.349	5.15789
175	0.285	0.294	-0.526316	0.291	-0.842105	0.349	5.26316
180	0.287	0.298	-0.315789	0.293	-0.842105	0.355	5.68421
185	0.287	0.298	-0.315789	0.294	-0.736842	0.356	5.78947
190	0.285	0.299	1.27822e-15	0.293	-0.631579	0.357	6.10526
195	0.287	0.299	-0.210526	0.296	-0.526316	0.359	6.10526
200	0.288	0.299	-0.315789	0.295	-0.736842	0.358	5.89474
205	0.288	0.302	1.27822e-15	0.296	-0.631579	0.362	6.31579
210	0.288	0.3	-0.210526	0.297	-0.526316	0.36	6.10526
215	0.288	0.302	1.27822e-15	0.299	-0.315789	0.362	6.31579
220	0.288	0.303	0.105263	0.297	-0.526316	0.363	6.42105
225	0.288	0.302	1.27822e-15	0.296	-0.631579	0.366	6.73684
230	0.29	0.303	-0.105263	0.296	-0.842105	0.363	6.21053
235	0.288	0.304	0.210526	0.296	-0.631579	0.366	6.73684
240	0.288	0.306	0.421053	0.3	-0.210526	0.366	6.73684
245	0.291	0.304	-0.105263	-0.676	-103.263	0.366	6.42105
250	0.292	-0.651	-100.737	-0.677	-103.474	-0.675	-103.263
255	0.291	-0.652	-100.737	0.289	-1.68421	-0.676	-103.263
260	0.291	0.308	0.315789	0.291	-1.47368	0.372	7.05263
265	0.29	0.311	0.736842	0.296	-0.842105	0.373	7.26316
270	0.291	0.312	0.736842	0.298	-0.736842	0.375	7.36842
275	0.29	0.313	0.947368	0.299	-0.526316	0.376	7.57895
280	0.289	0.312	0.947368	0.302	-0.105263	0.374	7.47368
285	0.289	0.314	1.15789	0.298	-0.526316	0.372	7.26316
290	0.29	0.314	1.05263	0.299	-0.526316	0.37	6.94737
295	0.291	0.316	1.15789	0.3	-0.526316	0.377	7.57895
300	0.289	0.314	1.15789	0.3	-0.315789	0.378	7.89474
305	0.292	0.314	0.842105	0.302	-0.421053	0.374	7.15789
310	0.291	0.316	1.15789	0.3	-0.526316	0.377	7.57895
315	0.293	0.316	0.947368	0.301	-0.631579	0.376	7.26316
320	0.289	0.317	1.47368	0.302	-0.105263	0.376	7.68421
325	0.29	0.315	1.15789	0.303	-0.105263	0.373	7.26316
330	0.292	0.317	1.15789	0.303	-0.315789	0.375	7.26316
335	0.293	0.317	1.05263	0.304	-0.315789	0.376	7.26316
340	0.29	0.319	1.57895	0.304	1.27822e-15	0.376	7.57895
345	0.29	0.318	1.47368	0.305	0.105263	0.374	7.36842
350	0.29	0.318	1.47368	0.301	-0.315789	0.375	7.47368
355	0.29	0.318	1.47368	0.304	1.27822e-15	0.375	7.47368
360	0.292	0.319	1.36842	0.305	-0.105263	0.374	7.15789
365	0.29	0.319	1.57895	0.305	0.105263	0.376	7.57895
370	0.291	0.317	1.26316	0.307	0.210526	0.375	7.36842
375	0.29	0.319	1.57895	0.308	0.421053	0.375	7.47368
380	0.293	0.32	1.36842	0.309	0.210526	0.374	7.05263
385	0.292	0.321	1.57895	0.306	1.27822e-15	0.378	7.57895
390	0.294	0.321	1.36842	0.306	-0.210526	0.375	7.05263
395	0.29	0.321	1.78947	0.308	0.421053	0.377	7.68421
400	0.291	0.323	1.89474	0.31	0.526316	0.379	7.78947
405	0.295	0.323	1.47368	0.308	-0.105263	0.38	7.47368
410	0.294	0.325	1.78947	0.311	0.315789	0.379	7.47368
415	0.291	0.321	1.68421	0.313	0.842105	0.378	7.68421
420	0.293	0.323	1.68421	0.311	0.421053	0.379	7.57895
425	0.292	0.323	1.78947	0.311	0.526316	0.379	7.68421
430	0.291	0.322	1.78947	0.311	0.631579	0.376	7.47368
435	0.295	0.323	1.47368	0.311	0.210526	0.379	7.36842
440	0.291	0.326	2.21053	0.314	0.947368	0.378	7.68421
445	0.291	0.326	2.21053	0.313	0.842105	0.382	8.10526
450	0.289	0.327	2.52632	0.314	1.15789	0.38	8.10526
455	0.293	0.326	2	0.313	0.631579	0.381	7.78947
460	0.291	0.328	2.42105	0.315	1.05263	0.382	8.10526
465	0.291	0.325	2.10526	0.313	0.842105	0.38	7.89474
470	0.29	0.329	2.63158	0.315	1.15789	0.383	8.31579
475	0.29	0.328	2.52632	0.315	1.15789	0.379	7.89474
480	0.29	0.329	2.63158	0.316	1.26316	0.381	8.10526
485	0.288	0.329	2.84211	0.314	1.26316	0.38	8.21053
490	0.291	0.328	2.42105	0.315	1.05263	0.382	8.10526
495	0.292	0.329	2.42105	0.314	0.842105	0.382	8
500	0.293	0.332	2.63158	0.317	1.05263	0.381	7.78947
505	0.293	0.33	2.42105	0.317	1.05263	0.384	8.10526
510	0.291	0.333	2.94737	0.318	1.36842	0.383	8.21053
515	0.294	0.331	2.42105	0.318	1.05263	0.381	7.68421
520	0.291	0.329	2.52632	0.319	1.47368	0.384	8.31579
525	0.291	0.329	2.52632	0.321	1.68421	0.382	8.10526
530	0.293	0.33	2.42105	0.321	1.47368	0.385	8.21053
535	0.291	0.332	2.84211	0.32	1.57895	0.384	8.31579
540	0.292	0.331	2.63158	0.321	1.57895	0.382	8
545	0.289	0.331	2.94737	0.319	1.68421	0.384	8.52632
550	0.294	0.331	2.42105	0.322	1.47368	0.386	8.21053
555	0.293	0.332	2.63158	0.322	1.57895	0.387	8.42105
560	0.292	0.332	2.73684	0.324	1.89474	0.382	8
565	0.292	0.333	2.84211	0.325	2	0.385	8.31579
570	0.294	0.331	2.42105	0.327	2	0.384	8
575	0.292	0.332	2.73684	0.328	2.31579	0.386	8.42105
580	0.296	0.334	2.52632	0.325	1.57895	0.387	8.10526
585	0.292	0.334	2.94737	0.326	2.10526	0.387	8.52632
590	0.292	0.335	3.05263	0.328	2.31579	0.389	8.73684
595	0.292	0.336	3.15789	0.328	2.31579	0.391	8.94737
600	0.293	0.335	2.94737	0.327	2.10526	0.391	8.84211
605	0.294	0.336	2.94737	0.33	2.31579	0.387	8.31579
610	0.296	0.335	2.63158	0.331	2.21053	0.39	8.42105
615	0.292	0.336	3.15789	0.329	2.42105	0.391	8.94737
620	0.294	0.337	3.05263	0.328	2.10526	0.39	8.63158
625	0.294	0.337	3.05263	0.329	2.21053	0.391	8.73684
630	0.294	0.337	3.05263	0.33	2.31579	0.39	8.63158
635	0.294	0.338	3.15789	0.33	2.31579	0.393	8.94737
640	0.295	0.336	2.84211	0.331	2.31579	0.393	8.84211
645	0.295	0.338	3.05263	0.331	2.31579	0.389	8.42105
650	0.295	0.34	3.26316	0.333	2.52632	0.392	8.73684
655	0.294	0.339	3.26316	0.335	2.84211	0.39	8.63158
660	0.294	0.341	3.47368	0.336	2.94737	0.393	8.94737
665	0.297	0.338	2.84211	0.333	2.31579	0.394	8.73684
670	0.295	0.341	3.36842	0.336	2.84211	0.394	8.94737
675	0.292	0.34	3.57895	0.337	3.26316	0.396	9.47368
680	0.297	0.341	3.15789	0.337	2.73684	0.394	8.73684
685	0.297	0.341	3.15789	0.336	2.63158	0.396	8.94737
690	0.295	0.342	3.47368	0.338	3.05263	0.393	8.84211
695	0.297	0.344	3.47368	0.338	2.84211	0.397	9.05263
700	0.294	0.342	3.57895	0.341	3.47368	0.399	9.57895
705	0.293	0.345	4	0.34	3.47368	0.396	9.36842
710	0.297	0.342	3.26316	0.343	3.36842	0.396	8.94737
715	0.292	0.345	4.10526	0.341	3.68421	0.397	9.57895
720	0.296	0.345	3.68421	0.343	3.47368	0.4	9.47368
725	0.296	0.347	3.89474	0.343	3.47368	0.4	9.47368
730	0.296	0.345	3.68421	0.345	3.68421	0.401	9.57895
735	0.296	0.345	3.68421	0.345	3.68421	0.398	9.26316
740	0.293	0.346	4.10526	0.346	4.10526	0.4	9.78947
745	0.296	0.346	3.78947	0.348	4	0.396	9.05263
750	0.296	0.348	4	0.347	3.89474	0.4	9.47368
755	0.295	0.347	4	0.348	4.10526	0.4	9.57895
760	0.298	0.347	3.68421	0.348	3.78947	0.402	9.47368
765	0.295	0.349	4.21053	0.349	4.21053	0.398	9.36842
770	0.295	0.347	4	0.35	4.31579	0.397	9.26316
775	0.295	0.349	4.21053	0.349	4.21053	0.401	9.68421
780	0.296	0.35	4.21053	0.351	4.31579	0.402	9.68421
785	0.297	0.35	4.10526	0.35	4.10526	0.403	9.68421
790	0.299	0.35	3.89474	0.349	3.78947	0.405	9.68421
795	0.295	0.35	4.31579	0.351	4.42105	0.401	9.68421
800	0.296	0.352	4.42105	0.352	4.42105	0.401	9.57895
805	0.297	0.349	4	0.351	4.21053	0.405	9.89474
810	0.295	0.354	4.73684	0.355	4.84211	0.407	10.3158
815	0.297	0.351	4.21053		-32.7368	0.401	9.47368
820	0.299	0.351	4		-32.9474	0.405	9.68421
825	0.299	0.351	4		-32.9474	0.406	9.78947
830	0.297	0.354	4.52632		-32.7368	0.404	9.78947
835	0.295	0.352	4.52632		-32.5263	0.405	10.1053
840	0.296	0.353	4.52632		-32.6316	0.407	10.2105
845	0.296	0.353	4.52632		-32.6316	0.404	9.89474
850	0.296	0.353	4.52632		-32.6316	0.408	10.3158
855	0.296	0.357	4.94737		-32.6316	0.407	10.2105
860	0.299	0.354	4.31579		-32.9474	0.407	9.89474
865	0.299	0.355	4.42105		-32.9474	0.409	10.1053
870	0.297	0.356	4.73684		-32.7368	0.407	10.1053
875	0.299	0.355	4.42105		-32.9474	0.41	10.2105
880	0.3	0.356	4.42105		-33.0526	0.41	10.1053
885	0.297	0.356	4.73684		-32.7368	0.411	10.5263
890	0.296	0.356	4.84211		-32.6316	0.408	10.3158
895	0.296	0.357	4.94737		-32.6316	0.411	10.6316
900	0.297	0.357	4.84211		-32.7368		-32.7368
905	0.299	0.358	4.73684		-32.9474		-32.9474
910	0.299	0.36	4.94737		-32.9474		-32.9474
915	0.297	0.36	5.15789		-32.7368		-32.7368
920	0.298	0.357	4.73684		-32.8421		-32.8421
925	0.298	0.359	4.94737		-32.8421		-32.8421
930	0.296	0.36	5.26316		-32.6316		-32.6316
935	0.299	0.358	4.73684		-32.9474		-32.9474
940	0.296	0.36	5.26316		-32.6316		-32.6316
945	0.299	0.358	4.73684		-32.9474		-32.9474
950	0.297	0.359	5.05263		-32.7368		-32.7368
955	0.297	0.362	5.36842		-32.7368		-32.7368
960	0.299	0.361	5.05263		-32.9474		-32.9474
965	0.298	0.373	6.42105		-32.8421		-32.8421
970	0.297	0.362	5.36842		-32.7368		-32.7368
975	0.298	0.359	4.94737		-32.8421		-32.8421
980	0.299	0.362	5.15789		-32.9474		-32.9474
985	0.298	0.363	5.36842		-32.8421		-32.8421
990	0.298	0.362	5.26316		-32.8421		-32.8421
995	0.297	0.364	5.57895		-32.7368		-32.7368
1000	0.297	0.363	5.47368		-32.7368		-32.7368
1005	0.297	0.364	5.57895		-32.7368		-32.7368
1010	0.298	0.363	5.36842		-32.8421		-32.8421
1015	0.296	0.363	5.57895		-32.6316		-32.6316
1020	0.298	0.367	5.78947		-32.8421		-32.8421
1025	0.299	0.366	5.57895		-32.9474		-32.9474
1030	0.297	0.362	5.36842		-32.7368		-32.7368
1035	0.299	0.367	5.68421		-32.9474		-32.9474
1040	0.298	0.366	5.68421		-32.8421		-32.8421
1045	0.297	0.366	5.78947		-32.7368		-32.7368
1050	0.298	0.366	5.68421		-32.8421		-32.8421
1055	0.297	0.364	5.57895		-32.7368		-32.7368
1060	0.297	0.365	5.68421		-32.7368		-32.7368
1065	0.297	0.365	5.68421		-32.7368		-32.7368
1070	0.3	0.363	5.15789		-33.0526		-33.0526
1075	0.298	0.366	5.68421		-32.8421		-32.8421
1080	0.299	0.369	5.89474		-32.9474		-32.9474
1085	0.299	0.368	5.78947		-32.9474		-32.9474
1090	0.298	0.368	5.89474		-32.8421		-32.8421
1095	0.298	0.366	5.68421		-32.8421		-32.8421
1100	0.297	0.366	5.78947		-32.7368		-32.7368
1105	0.298	0.367	5.78947		-32.8421		-32.8421
1110	0.3	0.367	5.57895		-33.0526		-33.0526
1115	0.297	0.366	5.78947		-32.7368		-32.7368
1120	0.298	0.367	5.78947		-32.8421		-32.8421
1125	0.297	0.367	5.89474		-32.7368		-32.7368
1130	0.297	0.368	6		-32.7368		-32.7368
1135	0.299	0.365	5.47368		-32.9474		-32.9474
1140	0.296	0.368	6.10526		-32.6316		-32.6316
1145	0.297	0.37	6.21053		-32.7368		-32.7368
1150	0.296	0.37	6.31579		-32.6316		-32.6316
1155	0.299	0.368	5.78947		-32.9474		-32.9474
1160	0.298	0.368	5.89474		-32.8421		-32.8421
1165	0.298	0.369	6		-32.8421		-32.8421
1170	0.301	0.37	5.78947		-33.1579		-33.1579
1175	0.298	0.37	6.10526		-32.8421		-32.8421
1180	0.3	0.369	5.78947		-33.0526		-33.0526
1185	0.301	0.369	5.68421		-33.1579		-33.1579
1190	0.296	0.371	6.42105		-32.6316		-32.6316
1195	0.296	0.371	6.42105		-32.6316		-32.6316
1200	0.297	0.373	6.52632		-32.7368		-32.7368
1205	0.3	0.369	5.78947		-33.0526		-33.0526
1210	0.299	0.372	6.21053		-32.9474		-32.9474
1215	0.297	0.372	6.42105		-32.7368		-32.7368
1220	0.296	0.371	6.42105		-32.6316		-32.6316
1225	0.298	0.369	6		-32.8421		-32.8421
1230	0.297	0.371	6.31579		-32.7368		-32.7368
1235	0.296	0.37	6.31579		-32.6316		-32.6316
1240	0.295	0.374	6.84211		-32.5263		-32.5263
1245	0.299	0.374	6.42105		-32.9474		-32.9474
1250	0.297	0.373	6.52632		-32.7368		-32.7368
1255	0.299	0.373	6.31579		-32.9474		-32.9474
1260	0.295	0.372	6.63158		-32.5263		-32.5263
1265	0.298	0.373	6.42105		-32.8421		-32.8421
1270	0.297	0.372	6.42105		-32.7368		-32.7368
1275	0.298	0.374	6.52632		-32.8421		-32.8421
1280	0.298	0.373	6.42105		-32.8421		-32.8421
1285	0.298	0.372	6.31579		-32.8421		-32.8421
1290	0.298	0.373	6.42105		-32.8421		-32.8421
1295	0.3	0.372	6.10526		-33.0526		-33.0526
1300	0.298	0.374	6.52632		-32.8421		-32.8421
1305	0.297	0.374	6.63158		-32.7368		-32.7368
1310	0.298	0.374	6.52632		-32.8421		-32.8421
1315	0.297	0.373	6.52632		-32.7368		-32.7368
1320	0.298	0.375	6.63158		-32.8421		-32.8421
1325	0.297	0.372	6.42105		-32.7368		-32.7368
1330	0.299	0.375	6.52632		-32.9474		-32.9474
1335	0.297	0.375	6.73684		-32.7368		-32.7368
1340	0.298	0.376	6.73684		-32.8421		-32.8421
1345	0.3	0.377	6.63158		-33.0526		-33.0526
1350	0.298	0.376	6.73684		-32.8421		-32.8421
1355	0.299	0.378	6.84211		-32.9474		-32.9474
1360	0.299	0.377	6.73684		-32.9474		-32.9474
1365	0.299	0.379	6.94737		-32.9474		-32.9474
1370	0.299	0.377	6.73684		-32.9474		-32.9474
1375	0.299	0.376	6.63158		-32.9474		-32.9474
1380	0.301	0.376	6.42105		-33.1579		-33.1579
1385	0.298	0.38	7.15789		-32.8421		-32.8421
1390	0.299	0.377	6.73684		-32.9474		-32.9474
1395	0.298	0.377	6.84211		-32.8421		-32.8421
1400	0.3	0.377	6.63158		-33.0526		-33.0526
1405	0.3	0.379	6.84211		-33.0526		-33.0526
1410	0.299	0.378	6.84211		-32.9474		-32.9474
1415	0.302	0.377	6.42105		-33.2632		-33.2632
1420	0.297	0.377	6.94737		-32.7368		-32.7368
1425	0.299		-32.9474		-32.9474		-32.9474
1430	0.303		-33.3684		-33.3684		-33.3684
1435	0.301		-33.1579		-33.1579		-33.1579
1440	0.3		-33.0526		-33.0526		-33.0526
1445	0.3		-33.0526		-33.0526		-33.0526
1450	0.298		-32.8421		-32.8421		-32.8421
1455	0.303		-33.3684		-33.3684		-33.3684
1460	0.298		-32.8421		-32.8421		-32.8421
1465	0.302		-33.2632		-33.2632		-33.2632
1470	0.302		-33.2632		-33.2632		-33.2632
1475	0.298		-32.8421		-32.8421		-32.8421
1480	0.299		-32.9474		-32.9474		-32.9474
1485	0.3		-33.0526		-33.0526		-33.0526
1490	0.3		-33.0526		-33.0526		-33.0526
1495	0.301		-33.1579		-33.1579		-33.1579
1500	0.301		-33.1579		-33.1579		-33.1579
1505	0.299		-32.9474		-32.9474		-32.9474
1510	0.299		-32.9474		-32.9474		-32.9474
1515	0.3		-33.0526		-33.0526		-33.0526
1520	0.299		-32.9474		-32.9474		-32.9474
1525	0.299		-32.9474		-32.9474		-32.9474
1530	0.3		-33.0526		-33.0526		-33.0526
1535	0.3		-33.0526		-33.0526		-33.0526
1540	0.299		-32.9474		-32.9474		-32.9474
1545	0.3		-33.0526		-33.0526		-33.0526
1550	0.299		-32.9474		-32.9474		-32.9474
1555	0.3		-33.0526		-33.0526		-33.0526
1560	0.301		-33.1579		-33.1579		-33.1579
1565	0.302		-33.2632		-33.2632		-33.2632
1570	0.3		-33.0526		-33.0526		-33.0526
1575	0.3		-33.0526		-33.0526		-33.0526
1580	0.301		-33.1579		-33.1579		-33.1579
1585	0.301		-33.1579		-33.1579		-33.1579
1590	0.3		-33.0526		-33.0526		-33.0526
1595	0.3		-33.0526		-33.0526		-33.0526
1600	0.3		-33.0526		-33.0526		-33.0526
1605	0.301		-33.1579		-33.1579		-33.1579
1610	0.302		-33.2632		-33.2632		-33.2632
1615	0.299		-32.9474		-32.9474		-32.9474
1620	0.3		-33.0526		-33.0526		-33.0526
1625	0.302		-33.2632		-33.2632		-33.2632
1630	0.3		-33.0526		-33.0526		-33.0526
1635	0.298		-32.8421		-32.8421		-32.8421
1640	0.302		-33.2632		-33.2632		-33.2632
1645	0.302		-33.2632		-33.2632		-33.2632
1650	0.302		-33.2632		-33.2632		-33.2632
1655	0.301		-33.1579		-33.1579		-33.1579
1660	0.302		-33.2632		-33.2632		-33.2632
1665	0.303		-33.3684		-33.3684		-33.3684
1670	0.3		-33.0526		-33.0526		-33.0526
1675	0.301		-33.1579		-33.1579		-33.1579
1680	0.3		-33.0526		-33.0526		-33.0526
1685	0.302		-33.2632		-33.2632		-33.2632
1690	0.3		-33.0526		-33.0526		-33.0526
1695	0.3		-33.0526		-33.0526		-33.0526
1700	0.3		-33.0526		-33.0526		-33.0526
1705	0.302		-33.2632		-33.2632		-33.2632
1710	0.303		-33.3684		-33.3684		-33.3684
1715	0.302		-33.2632		-33.2632		-33.2632
1720	0.299		-32.9474		-32.9474		-32.9474
1725	0.302		-33.2632		-33.2632		-33.2632
1730	0.303		-33.3684		-33.3684		-33.3684
1735	0.301		-33.1579		-33.1579		-33.1579
1740	0.301		-33.1579		-33.1579		-33.1579
1745	0.303		-33.3684		-33.3684		-33.3684
1750	0.301		-33.1579		-33.1579		-33.1579
1755	0.302		-33.2632		-33.2632		-33.2632
1760	0.305		-33.5789		-33.5789		-33.5789
1765	0.304		-33.4737		-33.4737		-33.4737
1770	0.302		-33.2632		-33.2632		-33.2632
1775	0.3		-33.0526		-33.0526		-33.0526
1780	0.3		-33.0526		-33.0526		-33.0526
1785	0.3		-33.0526		-33.0526		-33.0526
1790	0.302		-33.2632		-33.2632		-33.2632
1795	0.304		-33.4737		-33.4737		-33.4737
1800	0.301		-33.1579		-33.1579		-33.1579

## Sheet: 300Dtu_Mo
Time (sec)	BG_OD360	1st_OD360	1st_ΔPi con. (μM)	2nd_OD360	2nd_ΔPi con. (μM)	3rd_OD360	3rd_ΔPi con. (μM)
	0.1	0.073		0.074		0.073
5	0.118	0.092	-4.21053	0.093	-4.10526	0.09	-4.42105
10	0.134	0.108	-4.21053	0.112	-3.78947	0.107	-4.31579
15	0.152	0.125	-4.31579	0.126	-4.21053	0.123	-4.52632
20	0.165	0.141	-4	0.14	-4.10526	0.136	-4.52632
25	0.18	0.153	-4.31579	0.151	-4.52632	0.15	-4.63158
30	0.192	0.165	-4.31579	0.165	-4.31579	0.163	-4.52632
35	0.202	0.178	-4	0.174	-4.42105	0.173	-4.52632
40	0.212	0.189	-3.89474	0.183	-4.52632	0.183	-4.52632
45	0.223	0.198	-4.10526	0.194	-4.52632	0.197	-4.21053
50	0.231	0.207	-4	0.203	-4.42105	0.203	-4.42105
55	0.24	0.215	-4.10526	0.214	-4.21053	0.215	-4.10526
60	0.245	0.223	-3.78947	0.223	-3.78947	0.224	-3.68421
65	0.253	0.231	-3.78947	0.228	-4.10526	0.231	-3.78947
70	0.261	0.233	-4.42105	0.236	-4.10526	0.24	-3.68421
75	0.265	0.244	-3.68421	0.243	-3.78947	0.245	-3.57895
80	0.269	0.249	-3.57895	0.249	-3.57895	0.251	-3.36842
85	0.274	0.251	-3.89474	0.253	-3.68421	0.259	-3.05263
90	0.28	0.262	-3.36842	0.259	-3.68421	0.263	-3.26316
95	0.283	0.261	-3.78947	0.263	-3.57895	0.268	-3.05263
100	0.286	0.267	-3.47368	0.27	-3.15789	0.273	-2.84211
105	0.29	0.27	-3.57895	0.271	-3.47368	0.276	-2.94737
110	0.294	0.273	-3.68421	0.274	-3.57895	0.281	-2.84211
115	0.295	0.275	-3.57895	0.279	-3.15789	0.285	-2.52632
120	0.295	0.279	-3.15789	0.282	-2.84211	0.289	-2.10526
125	0.3	0.281	-3.47368	0.286	-2.94737	0.294	-2.10526
130	0.298	0.282	-3.15789	0.288	-2.52632	0.293	-2
135	0.303	0.283	-3.57895	0.292	-2.63158	0.297	-2.10526
140	0.304	0.285	-3.47368	0.291	-2.84211	0.299	-2
145	0.308	0.289	-3.47368	0.294	-2.94737	0.304	-1.89474
150	0.306	0.289	-3.26316	0.297	-2.42105	0.301	-2
155	0.308	0.289	-3.47368	0.298	-2.52632	0.307	-1.57895
160	0.307	0.291	-3.15789	0.299	-2.31579	0.306	-1.57895
165	0.308	0.29	-3.36842	0.301	-2.21053	0.311	-1.15789
170	0.31	0.292	-3.36842	0.302	-2.31579	0.309	-1.57895
175	0.313	0.293	-3.57895	0.302	-2.63158	0.312	-1.57895
180	0.312	0.291	-3.68421	0.305	-2.21053	0.314	-1.26316
185	0.314	0.297	-3.26316	0.304	-2.52632	0.314	-1.47368
190	0.314	0.295	-3.47368	0.306	-2.31579	0.314	-1.47368
195	0.312	0.294	-3.36842	0.307	-2	0.313	-1.36842
200	0.314	0.296	-3.36842	0.307	-2.21053	0.316	-1.26316
205	0.315	0.297	-3.36842	0.307	-2.31579	0.319	-1.05263
210	0.315	0.296	-3.47368	0.307	-2.31579	0.315	-1.47368
215	0.315	0.295	-3.57895	0.31	-2	0.317	-1.26316
220	0.315	0.297	-3.36842	0.308	-2.21053	0.32	-0.947368
225	0.314	0.296	-3.36842	0.307	-2.21053	0.319	-0.947368
230	0.313	0.296	-3.26316	0.31	-1.78947	0.319	-0.842105
235	0.314	0.295	-3.47368	0.31	-1.89474	0.319	-0.947368
240	0.315	0.296	-3.47368	0.31	-2	0.319	-1.05263
245	0.315	0.297	-3.36842	0.308	-2.21053	-0.675	-105.684
250	0.315	-0.68	-106.211	-0.675	-105.684	-0.677	-105.895
255	0.317	-0.68	-106.421	-0.675	-105.895	0.304	-2.84211
260	0.314	0.296	-3.36842	0.306	-2.31579	0.311	-1.78947
265	0.314	0.295	-3.47368	0.306	-2.31579	0.314	-1.47368
270	0.314	0.297	-3.26316	0.306	-2.31579	0.317	-1.15789
275	0.316	0.298	-3.36842	0.307	-2.42105	0.319	-1.15789
280	0.316	0.299	-3.26316	0.308	-2.31579	0.33	1.27822e-15
285	0.314	0.3	-2.94737	0.311	-1.78947	0.321	-0.736842
290	0.315	0.3	-3.05263	0.311	-1.89474	0.322	-0.736842
295	0.315	0.297	-3.36842	0.312	-1.78947	0.321	-0.842105
300	0.316	0.3	-3.15789	0.311	-2	0.322	-0.842105
305	0.315	0.301	-2.94737	0.314	-1.57895	0.324	-0.526316
310	0.316	0.3	-3.15789	0.314	-1.68421	0.324	-0.631579
315	0.313	0.299	-2.94737	0.312	-1.57895	0.322	-0.526316
320	0.316	0.303	-2.84211	0.315	-1.57895	0.324	-0.631579
325	0.312	0.302	-2.52632	0.317	-0.947368	0.325	-0.105263
330	0.314	0.304	-2.52632	0.316	-1.26316	0.326	-0.210526
335	0.314	0.299	-3.05263	0.316	-1.26316	0.325	-0.315789
340	0.316	0.303	-2.84211	0.317	-1.36842	0.324	-0.631579
345	0.316	0.313	-1.78947	0.32	-1.05263	0.328	-0.210526
350	0.317	0.303	-2.94737	0.32	-1.15789	0.325	-0.631579
355	0.317	0.306	-2.63158	0.317	-1.47368	0.325	-0.631579
360	0.315	0.303	-2.73684	0.318	-1.15789	0.33	0.105263
365	0.316	0.305	-2.63158	0.319	-1.15789	0.327	-0.315789
370	0.314	0.306	-2.31579	0.32	-0.842105	0.327	-0.105263
375	0.315	0.305	-2.52632	0.318	-1.15789	0.329	1.27822e-15
380	0.314	0.306	-2.31579	0.322	-0.631579	0.33	0.210526
385	0.316	0.303	-2.84211	0.321	-0.947368	0.329	-0.105263
390	0.313	0.308	-2	0.32	-0.736842	0.328	0.105263
395	0.315	0.306	-2.42105	0.32	-0.947368	0.329	1.27822e-15
400	0.315	0.308	-2.21053	0.322	-0.736842	0.329	1.27822e-15
405	0.314	0.304	-2.52632	0.323	-0.526316	0.332	0.421053
410	0.316	0.307	-2.42105	0.324	-0.631579	0.331	0.105263
415	0.314	0.309	-2	0.323	-0.526316	0.332	0.421053
420	0.314	0.308	-2.10526	0.321	-0.736842	0.332	0.421053
425	0.313	0.31	-1.78947	0.324	-0.315789	0.331	0.421053
430	0.313	0.308	-2	0.322	-0.526316	0.33	0.315789
435	0.316	0.309	-2.21053	0.323	-0.736842	0.333	0.315789
440	0.313	0.31	-1.78947	0.325	-0.210526	0.331	0.421053
445	0.315	0.308	-2.21053	0.325	-0.421053	0.331	0.210526
450	0.314	0.308	-2.10526	0.324	-0.421053	0.334	0.631579
455	0.315	0.309	-2.10526	0.327	-0.210526	0.333	0.421053
460	0.314	0.311	-1.78947	0.328	1.27822e-15	0.336	0.842105
465	0.314	0.311	-1.78947	0.327	-0.105263	0.335	0.736842
470	0.312	0.312	-1.47368	0.329	0.315789	0.335	0.947368
475	0.313	0.312	-1.57895	0.329	0.210526	0.335	0.842105
480	0.314	0.31	-1.89474	0.327	-0.105263	0.337	0.947368
485	0.314	0.314	-1.47368	0.328	1.27822e-15	0.338	1.05263
490	0.312	0.312	-1.47368	0.328	0.210526	0.337	1.15789
495	0.313	0.312	-1.57895	0.331	0.421053	0.336	0.947368
500	0.316	0.326	-0.421053	0.331	0.105263	0.337	0.736842
505	0.313	0.311	-1.68421	0.331	0.421053	0.342	1.57895
510	0.314	0.313	-1.57895	0.33	0.210526	0.338	1.05263
515	0.315	0.31	-2	0.331	0.210526	0.338	0.947368
520	0.314	0.314	-1.47368	0.331	0.315789	0.34	1.26316
525	0.313	0.316	-1.15789	0.332	0.526316	0.341	1.47368
530	0.313	0.319	-0.842105	0.334	0.736842	0.34	1.36842
535	0.315	0.315	-1.47368	0.334	0.526316	0.344	1.57895
540	0.314	0.317	-1.15789	0.333	0.526316	0.342	1.47368
545	0.312	0.317	-0.947368	0.336	1.05263	0.344	1.89474
550	0.311	0.315	-1.05263	0.334	0.947368	0.345	2.10526
555	0.316	0.318	-1.26316	0.335	0.526316	0.345	1.57895
560	0.314	0.318	-1.05263	0.338	1.05263	0.344	1.68421
565	0.314	0.321	-0.736842	0.334	0.631579	0.343	1.57895
570	0.313	0.319	-0.842105	0.337	1.05263	0.343	1.68421
575	0.311	0.318	-0.736842	0.338	1.36842	0.346	2.21053
580	0.313	0.319	-0.842105	0.337	1.05263	0.345	1.89474
585	0.313	0.32	-0.736842	0.338	1.15789	0.346	2
590	0.315	0.32	-0.947368	0.34	1.15789	0.346	1.78947
595	0.314	0.321	-0.736842	0.341	1.36842	0.346	1.89474
600	0.313	0.323	-0.421053	0.34	1.36842	0.347	2.10526
605	0.314	0.324	-0.421053	0.34	1.26316	0.346	1.89474
610	0.316	0.321	-0.947368	0.339	0.947368	0.348	1.89474
615	0.312	0.324	-0.210526	0.339	1.36842	0.347	2.21053
620	0.314	0.324	-0.421053	0.342	1.47368	0.348	2.10526
625	0.312	0.326	1.27822e-15	0.343	1.78947	0.345	2
630	0.312	0.327	0.105263	0.342	1.68421	0.35	2.52632
635	0.314	0.326	-0.210526	0.342	1.47368	0.35	2.31579
640	0.315	0.326	-0.315789	0.343	1.47368	0.351	2.31579
645	0.314	0.325	-0.315789	0.344	1.68421	0.351	2.42105
650	0.315	0.327	-0.210526	0.347	1.89474	0.353	2.52632
655	0.313	0.327	1.27822e-15	0.346	2	0.352	2.63158
660	0.313	0.331	0.421053	0.344	1.78947	0.354	2.84211
665	0.314	0.328	1.27822e-15	0.347	2	0.356	2.94737
670	0.312	0.328	0.210526	0.348	2.31579	0.355	3.05263
675	0.316	0.331	0.105263	0.346	1.68421	0.354	2.52632
680	0.313	0.331	0.421053	0.348	2.21053	0.356	3.05263
685	0.313	0.334	0.736842	0.343	1.68421	0.354	2.84211
690	0.314	0.332	0.421053	0.348	2.10526	0.356	2.94737
695	0.313	0.334	0.736842	0.35	2.42105	0.36	3.47368
700	0.311	0.33	0.526316	0.35	2.63158	0.356	3.26316
705	0.311	0.334	0.947368	0.352	2.84211	0.359	3.57895
710	0.313	0.335	0.842105	0.353	2.73684	0.36	3.47368
715	0.314	0.335	0.736842	0.35	2.31579	0.36	3.36842
720	0.308	0.336	1.47368	0.354	3.36842	0.36	4
725	0.312	0.337	1.15789	0.354	2.94737	0.362	3.78947
730	0.312	0.338	1.26316	0.352	2.73684	0.362	3.78947
735	0.312	0.339	1.36842	0.353	2.84211	0.362	3.78947
740	0.315	0.337	0.842105	0.352	2.42105	0.363	3.57895
745	0.313	0.339	1.26316	0.354	2.84211	0.363	3.78947
750	0.31	0.34	1.68421	0.353	3.05263	0.362	4
755	0.311	0.336	1.15789	0.356	3.26316	0.362	3.89474
760	0.312	0.342	1.68421	0.355	3.05263	0.362	3.78947
765	0.311	0.341	1.68421	0.357	3.36842	0.365	4.21053
770	0.313	0.341	1.47368	0.355	2.94737	0.366	4.10526
775	0.312	0.34	1.47368	0.357	3.26316	0.369	4.52632
780	0.311	0.344	2	0.357	3.36842	0.364	4.10526
785	0.313	0.343	1.68421	0.359	3.36842	0.368	4.31579
790	0.312	0.344	1.89474	0.358	3.36842	0.366	4.21053
795	0.313	0.343	1.68421	0.361	3.57895	0.367	4.21053
800	0.312	0.345	2	0.361	3.68421	0.368	4.42105
805	0.312	0.345	2	0.361	3.68421	0.368	4.42105
810	0.315	0.347	1.89474	0.362	3.47368	0.372	4.52632
815	0.313	0.343	1.68421	0.359	3.36842	0.37	4.52632
820	0.314	0.346	1.89474	0.362	3.57895	0.373	4.73684
825	0.314	0.344	1.68421	0.362	3.57895	0.371	4.52632
830	0.315	0.351	2.31579	0.36	3.26316	0.373	4.63158
835	0.311	0.357	3.36842	0.362	3.89474	0.371	4.84211
840	0.312	0.343	1.78947	0.361	3.68421	0.371	4.73684
845	0.313	0.359	3.36842	0.364	3.89474	0.373	4.84211
850	0.312	0.351	2.63158	0.366	4.21053	0.372	4.84211
855	0.312	0.349	2.42105	0.363	3.89474	0.373	4.94737
860	0.312	0.352	2.73684	0.363	3.89474	0.374	5.05263
865	0.311	0.35	2.63158	0.366	4.31579	0.372	4.94737
870	0.313	0.353	2.73684	0.366	4.10526	0.376	5.15789
875	0.31	0.353	3.05263	0.366	4.42105	0.373	5.15789
880	0.314	0.354	2.73684	0.365	3.89474	0.375	4.94737
885	0.314	0.353	2.63158	0.363	3.68421	0.377	5.15789
890	0.312	0.355	3.05263	0.366	4.21053	0.374	5.05263
895	0.312	0.353	2.84211	0.365	4.10526	0.377	5.36842
900	0.311	0.352	2.84211	0.366	4.31579	0.378	5.57895
905	0.312	0.354	2.94737		-34.3158		-34.3158
910	0.313	0.356	3.05263		-34.4211		-34.4211
915	0.312	0.354	2.94737		-34.3158		-34.3158
920	0.313	0.356	3.05263		-34.4211		-34.4211
925	0.313	0.357	3.15789		-34.4211		-34.4211
930	0.313	0.369	4.42105		-34.4211		-34.4211
935	0.315	0.359	3.15789		-34.6316		-34.6316
940	0.312	0.358	3.36842		-34.3158		-34.3158
945	0.315	0.358	3.05263		-34.6316		-34.6316
950	0.314	0.359	3.26316		-34.5263		-34.5263
955	0.315	0.359	3.15789		-34.6316		-34.6316
960	0.314	0.364	3.78947		-34.5263		-34.5263
965	0.314	0.36	3.36842		-34.5263		-34.5263
970	0.312	0.362	3.78947		-34.3158		-34.3158
975	0.315	0.362	3.47368		-34.6316		-34.6316
980	0.312	0.363	3.89474		-34.3158		-34.3158
985	0.314	0.36	3.36842		-34.5263		-34.5263
990	0.315	0.362	3.47368		-34.6316		-34.6316
995	0.313	0.361	3.57895		-34.4211		-34.4211
1000	0.313	0.365	4		-34.4211		-34.4211
1005	0.312	0.364	4		-34.3158		-34.3158
1010	0.312	0.362	3.78947		-34.3158		-34.3158
1015	0.312	0.364	4		-34.3158		-34.3158
1020	0.312	0.363	3.89474		-34.3158		-34.3158
1025	0.314	0.365	3.89474		-34.5263		-34.5263
1030	0.311	0.366	4.31579		-34.2105		-34.2105
1035	0.312	0.364	4		-34.3158		-34.3158
1040	0.312	0.365	4.10526		-34.3158		-34.3158
1045	0.313	0.366	4.10526		-34.4211		-34.4211
1050	0.311	0.366	4.31579		-34.2105		-34.2105
1055	0.314	0.369	4.31579		-34.5263		-34.5263
1060	0.311	0.369	4.63158		-34.2105		-34.2105
1065	0.312	0.367	4.31579		-34.3158		-34.3158
1070	0.315	0.368	4.10526		-34.6316		-34.6316
1075	0.309	0.364	4.31579		-34		-34
1080	0.314	0.367	4.10526		-34.5263		-34.5263
1085	0.314	0.365	3.89474		-34.5263		-34.5263
1090	0.313	0.367	4.21053		-34.4211		-34.4211
1095	0.309	0.367	4.63158		-34		-34
1100	0.309	0.368	4.73684		-34		-34
1105	0.313	0.371	4.63158		-34.4211		-34.4211
1110	0.312	0.367	4.31579		-34.3158		-34.3158
1115	0.311	0.369	4.63158		-34.2105		-34.2105
1120	0.31	0.368	4.63158		-34.1053		-34.1053
1125	0.311	0.372	4.94737		-34.2105		-34.2105
1130	0.312	0.372	4.84211		-34.3158		-34.3158
1135	0.313	0.369	4.42105		-34.4211		-34.4211
1140	0.315	0.368	4.10526		-34.6316		-34.6316
1145	0.311	0.368	4.52632		-34.2105		-34.2105
1150	0.312	0.37	4.63158		-34.3158		-34.3158
1155	0.311	0.37	4.73684		-34.2105		-34.2105
1160	0.312	0.371	4.73684		-34.3158		-34.3158
1165	0.313	0.371	4.63158		-34.4211		-34.4211
1170	0.313	0.372	4.73684		-34.4211		-34.4211
1175	0.313	0.373	4.84211		-34.4211		-34.4211
1180	0.313	0.372	4.73684		-34.4211		-34.4211
1185	0.314	0.372	4.63158		-34.5263		-34.5263
1190	0.313	0.371	4.63158		-34.4211		-34.4211
1195	0.312	0.372	4.84211		-34.3158		-34.3158
1200	0.313	0.373	4.84211		-34.4211		-34.4211
1205	0.31	0.373	5.15789		-34.1053		-34.1053
1210	0.311	0.372	4.94737		-34.2105		-34.2105
1215	0.312	0.368	4.42105		-34.3158		-34.3158
1220	0.314	0.375	4.94737		-34.5263		-34.5263
1225	0.313	0.371	4.63158		-34.4211		-34.4211
1230	0.312	0.374	5.05263		-34.3158		-34.3158
1235	0.314	0.371	4.52632		-34.5263		-34.5263
1240	0.31	0.374	5.26316		-34.1053		-34.1053
1245	0.312	0.377	5.36842		-34.3158		-34.3158
1250	0.309	0.374	5.36842		-34		-34
1255	0.311	0.374	5.15789		-34.2105		-34.2105
1260	0.312	0.376	5.26316		-34.3158		-34.3158
1265	0.312	0.374	5.05263		-34.3158		-34.3158
1270	0.311	0.375	5.26316		-34.2105		-34.2105
1275	0.315	0.376	4.94737		-34.6316		-34.6316
1280	0.309	0.377	5.68421		-34		-34
1285	0.313	0.374	4.94737		-34.4211		-34.4211
1290	0.312	0.377	5.36842		-34.3158		-34.3158
1295	0.312	0.374	5.05263		-34.3158		-34.3158
1300	0.314	0.374	4.84211		-34.5263		-34.5263
1305	0.311	0.376	5.36842		-34.2105		-34.2105
1310	0.31	0.378	5.68421		-34.1053		-34.1053
1315	0.311	0.376	5.36842		-34.2105		-34.2105
1320	0.313	0.376	5.15789		-34.4211		-34.4211
1325	0.311	0.375	5.26316		-34.2105		-34.2105
1330	0.312	0.378	5.47368		-34.3158		-34.3158
1335	0.311	0.376	5.36842		-34.2105		-34.2105
1340	0.311	0.378	5.57895		-34.2105		-34.2105
1345	0.312	0.376	5.26316		-34.3158		-34.3158
1350	0.314	0.377	5.15789		-34.5263		-34.5263
1355	0.312	0.375	5.15789		-34.3158		-34.3158
1360	0.313	0.378	5.36842		-34.4211		-34.4211
1365	0.313	0.377	5.26316		-34.4211		-34.4211
1370	0.311	0.377	5.47368		-34.2105		-34.2105
1375	0.313	0.381	5.68421		-34.4211		-34.4211
1380	0.314	0.378	5.26316		-34.5263		-34.5263
1385	0.312	0.377	5.36842		-34.3158		-34.3158
1390	0.309	0.378	5.78947		-34		-34
1395	0.316	0.38	5.26316		-34.7368		-34.7368
1400	0.312	0.381	5.78947		-34.3158		-34.3158
1405	0.314		-34.5263		-34.5263		-34.5263
1410	0.312		-34.3158		-34.3158		-34.3158
1415	0.313		-34.4211		-34.4211		-34.4211
1420	0.313		-34.4211		-34.4211		-34.4211
1425	0.312		-34.3158		-34.3158		-34.3158
1430	0.314		-34.5263		-34.5263		-34.5263
1435	0.31		-34.1053		-34.1053		-34.1053
1440	0.312		-34.3158		-34.3158		-34.3158
1445	0.31		-34.1053		-34.1053		-34.1053
1450	0.312		-34.3158		-34.3158		-34.3158
1455	0.311		-34.2105		-34.2105		-34.2105
1460	0.312		-34.3158		-34.3158		-34.3158
1465	0.311		-34.2105		-34.2105		-34.2105
1470	0.312		-34.3158		-34.3158		-34.3158
1475	0.313		-34.4211		-34.4211		-34.4211
1480	0.313		-34.4211		-34.4211		-34.4211
1485	0.314		-34.5263		-34.5263		-34.5263
1490	0.313		-34.4211		-34.4211		-34.4211
1495	0.313		-34.4211		-34.4211		-34.4211
1500	0.314		-34.5263		-34.5263		-34.5263
1505	0.314		-34.5263		-34.5263		-34.5263
1510	0.314		-34.5263		-34.5263		-34.5263
1515	0.313		-34.4211		-34.4211		-34.4211
1520	0.314		-34.5263		-34.5263		-34.5263
1525	0.312		-34.3158		-34.3158		-34.3158
1530	0.311		-34.2105		-34.2105		-34.2105
1535	0.313		-34.4211		-34.4211		-34.4211
1540	0.311		-34.2105		-34.2105		-34.2105
1545	0.314		-34.5263		-34.5263		-34.5263
1550	0.313		-34.4211		-34.4211		-34.4211
1555	0.312		-34.3158		-34.3158		-34.3158
1560	0.312		-34.3158		-34.3158		-34.3158
1565	0.313		-34.4211		-34.4211		-34.4211
1570	0.31		-34.1053		-34.1053		-34.1053
1575	0.309		-34		-34		-34
1580	0.311		-34.2105		-34.2105		-34.2105
1585	0.312		-34.3158		-34.3158		-34.3158
1590	0.313		-34.4211		-34.4211		-34.4211
1595	0.312		-34.3158		-34.3158		-34.3158
1600	0.31		-34.1053		-34.1053		-34.1053
1605	0.313		-34.4211		-34.4211		-34.4211
1610	0.312		-34.3158		-34.3158		-34.3158
1615	0.313		-34.4211		-34.4211		-34.4211
1620	0.312		-34.3158		-34.3158		-34.3158
1625	0.311		-34.2105		-34.2105		-34.2105
1630	0.314		-34.5263		-34.5263		-34.5263
1635	0.312		-34.3158		-34.3158		-34.3158
1640	0.312		-34.3158		-34.3158		-34.3158
1645	0.312		-34.3158		-34.3158		-34.3158
1650	0.311		-34.2105		-34.2105		-34.2105
1655	0.313		-34.4211		-34.4211		-34.4211
1660	0.312		-34.3158		-34.3158		-34.3158
1665	0.311		-34.2105		-34.2105		-34.2105
1670	0.312		-34.3158		-34.3158		-34.3158
1675	0.312		-34.3158		-34.3158		-34.3158
1680	0.312		-34.3158		-34.3158		-34.3158
1685	0.309		-34		-34		-34
1690	0.314		-34.5263		-34.5263		-34.5263
1695	0.313		-34.4211		-34.4211		-34.4211
1700	0.316		-34.7368		-34.7368		-34.7368
1705	0.312		-34.3158		-34.3158		-34.3158
1710	0.313		-34.4211		-34.4211		-34.4211
1715	0.313		-34.4211		-34.4211		-34.4211
1720	0.313		-34.4211		-34.4211		-34.4211
1725	0.313		-34.4211		-34.4211		-34.4211
1730	0.312		-34.3158		-34.3158		-34.3158
1735	0.314		-34.5263		-34.5263		-34.5263
1740	0.314		-34.5263		-34.5263		-34.5263
1745	0.314		-34.5263		-34.5263		-34.5263
1750	0.313		-34.4211		-34.4211		-34.4211
1755	0.315		-34.6316		-34.6316		-34.6316
1760	0.312		-34.3158		-34.3158		-34.3158
1765	0.314		-34.5263		-34.5263		-34.5263
1770	0.313		-34.4211		-34.4211		-34.4211
1775	0.314		-34.5263		-34.5263		-34.5263
1780	0.314		-34.5263		-34.5263		-34.5263
1785	0.314		-34.5263		-34.5263		-34.5263
1790	0.314		-34.5263		-34.5263		-34.5263
1795	0.313		-34.4211		-34.4211		-34.4211
1800	0.312		-34.3158		-34.3158		-34.3158

## Sheet: 1000Dtu_Mo
Time (sec)	BG_OD360	1st_OD360	1st_ΔPi con. (μM)	2nd_OD360	2nd_ΔPi con. (μM)	3rd_OD360	3rd_ΔPi con. (μM)
	0.07	0.069		0.07		0.081
5	0.088	0.087	-1.57895	0.089	-1.36842	0.095	-0.736842
10	0.106	0.104	-1.68421	0.102	-1.89474	0.111	-0.947368
15	0.123	0.119	-1.89474	0.117	-2.10526	0.126	-1.15789
20	0.135	0.135	-1.47368	0.134	-1.57895	0.141	-0.842105
25	0.151	0.146	-2	0.146	-2	0.15	-1.57895
30	0.16	0.162	-1.26316	0.159	-1.57895	0.164	-1.05263
35	0.17	0.172	-1.26316	0.169	-1.57895	0.174	-1.05263
40	0.183	0.183	-1.47368	0.181	-1.68421	0.183	-1.47368
45	0.191	0.194	-1.15789	0.188	-1.78947	0.192	-1.36842
50	0.2	0.203	-1.15789	0.2	-1.47368	0.203	-1.15789
55	0.208	0.213	-0.947368	0.206	-1.68421	0.212	-1.05263
60	0.215	0.222	-0.736842	0.218	-1.15789	0.22	-0.947368
65	0.223	0.228	-0.947368	0.226	-1.15789	0.226	-1.15789
70	0.229	0.236	-0.736842	0.229	-1.47368	0.234	-0.947368
75	0.234	0.241	-0.736842	0.236	-1.26316	0.237	-1.15789
80	0.24	0.249	-0.526316	0.245	-0.947368	0.245	-0.947368
85	0.244	0.253	-0.526316	0.248	-1.05263	0.25	-0.842105
90	0.251	0.259	-0.631579	0.254	-1.15789	0.258	-0.736842
95	0.254	0.263	-0.526316	0.257	-1.15789	0.263	-0.526316
100	0.259	0.268	-0.526316	0.26	-1.36842	0.264	-0.947368
105	0.262	0.272	-0.421053	0.267	-0.947368	0.268	-0.842105
110	0.263	0.276	-0.105263	0.267	-1.05263	0.274	-0.315789
115	0.267	0.279	-0.210526	0.272	-0.947368	0.276	-0.526316
120	0.268	0.284	0.210526	0.271	-1.15789	0.278	-0.421053
125	0.271	0.285	-4.56506e-15	0.276	-0.947368	0.281	-0.421053
130	0.274	0.287	-0.105263	0.278	-1.05263	0.283	-0.526316
135	0.274	0.288	-4.56506e-15	0.279	-0.947368	0.285	-0.315789
140	0.277	0.291	-4.56506e-15	0.282	-0.947368	0.288	-0.315789
145	0.279	0.295	0.210526	0.285	-0.842105	0.287	-0.631579
150	0.28	0.296	0.210526	0.286	-0.842105	0.293	-0.105263
155	0.28	0.297	0.315789	0.288	-0.631579	0.291	-0.315789
160	0.281	0.298	0.315789	0.289	-0.631579	0.295	-4.56506e-15
165	0.283	0.3	0.315789	0.29	-0.736842	0.298	0.105263
170	0.283	0.301	0.421053	0.288	-0.947368	0.294	-0.315789
175	0.286	0.302	0.210526	0.291	-0.947368	0.297	-0.315789
180	0.286	0.3	1.27822e-15	0.29	-1.05263	0.298	-0.210526
185	0.286	0.301	0.105263	0.293	-0.736842	0.298	-0.210526
190	0.285	0.301	0.210526	0.294	-0.526316	0.3	0.105263
195	0.286	0.303	0.315789	0.296	-0.421053	0.301	0.105263
200	0.287	0.306	0.526316	0.293	-0.842105	0.301	1.27822e-15
205	0.287	0.306	0.526316	0.295	-0.631579	0.303	0.210526
210	0.289	0.306	0.315789	0.295	-0.842105	0.304	0.105263
215	0.287	0.305	0.421053	0.296	-0.526316	0.302	0.105263
220	0.289	0.309	0.631579	0.295	-0.842105	0.304	0.105263
225	0.288	0.303	0.105263	0.296	-0.631579	0.304	0.210526
230	0.29	0.306	0.210526	0.294	-1.05263	0.304	1.27822e-15
235	0.292	0.306	1.27822e-15	0.296	-1.05263	0.306	1.27822e-15
240	0.291	0.306	0.105263	0.3	-0.526316	0.303	-0.210526
245	0.289	-0.653	-100.632	0.298	-0.526316	-0.675	-102.947
250	0.291	-0.654	-100.947	-0.676	-103.263	-0.674	-103.053
255	0.292	0.304	-0.210526	-0.676	-103.368	0.312	0.631579
260	0.292	0.307	0.105263	0.304	-0.210526	0.312	0.631579
265	0.292	0.308	0.210526	0.304	-0.210526	0.315	0.947368
270	0.291	0.307	0.210526	0.303	-0.210526	0.314	0.947368
275	0.29	0.31	0.631579	0.304	1.27822e-15	0.315	1.15789
280	0.293	0.311	0.421053	0.308	0.105263	0.315	0.842105
285	0.293	0.311	0.421053	0.309	0.210526	0.316	0.947368
290	0.293	0.312	0.526316	0.308	0.105263	0.315	0.842105
295	0.29	0.312	0.842105	0.31	0.631579	0.315	1.15789
300	0.292	0.315	0.947368	0.309	0.315789	0.314	0.842105
305	0.291	0.314	0.947368	0.31	0.526316	0.318	1.36842
310	0.29	0.317	1.36842	0.315	1.15789	0.318	1.47368
315	0.291	0.317	1.26316	0.314	0.947368	0.318	1.36842
320	0.292	0.318	1.26316	0.316	1.05263	0.318	1.26316
325	0.291	0.32	1.57895	0.314	0.947368	0.318	1.36842
330	0.291	0.32	1.57895	0.316	1.15789	0.32	1.57895
335	0.291	0.323	1.89474	0.32	1.57895	0.321	1.68421
340	0.292	0.321	1.57895	0.318	1.26316	0.317	1.15789
345	0.291	0.324	2	0.315	1.05263	0.322	1.78947
350	0.292	0.323	1.78947	0.317	1.15789	0.325	2
355	0.294	0.326	1.89474	0.319	1.15789	0.32	1.26316
360	0.291	0.325	2.10526	0.319	1.47368	0.325	2.10526
365	0.292	0.324	1.89474	0.321	1.57895	0.322	1.68421
370	0.292	0.325	2	0.32	1.47368	0.327	2.21053
375	0.291	0.327	2.31579	0.323	1.89474	0.324	2
380	0.293	0.328	2.21053	0.32	1.36842	0.327	2.10526
385	0.292	0.328	2.31579	0.324	1.89474	0.324	1.89474
390	0.293	0.329	2.31579	0.324	1.78947	0.329	2.31579
395	0.295	0.328	2		-32.5263	0.331	2.31579
400	0.294	0.331	2.42105		-32.4211	0.329	2.21053
405	0.29	0.332	2.94737		-32	0.33	2.73684
410	0.294	0.332	2.52632		-32.4211	0.333	2.63158
415	0.293	0.332	2.63158		-32.3158	0.329	2.31579
420	0.294	0.334	2.73684		-32.4211	0.333	2.63158
425	0.293	0.332	2.63158		-32.3158	0.332	2.63158
430	0.293	0.335	2.94737		-32.3158	0.333	2.73684
435	0.294	0.333	2.63158		-32.4211	0.333	2.63158
440	0.295	0.333	2.52632		-32.5263	0.336	2.84211
445	0.293	0.335	2.94737		-32.3158	0.335	2.94737
450	0.296	0.334	2.52632		-32.6316	0.336	2.73684
455	0.293	0.337	3.15789		-32.3158	0.34	3.47368
460	0.293	0.337	3.15789		-32.3158	0.34	3.47368
465	0.294	0.337	3.05263		-32.4211	0.341	3.47368
470	0.294	0.342	3.57895		-32.4211	0.341	3.47368
475	0.294	0.339	3.26316		-32.4211	0.345	3.89474
480	0.294	0.34	3.36842		-32.4211	0.343	3.68421
485	0.293	0.34	3.47368		-32.3158	0.343	3.78947
490	0.293	0.342	3.68421		-32.3158	0.346	4.10526
495	0.292	0.342	3.78947		-32.2105	0.344	4
500	0.293	0.343	3.78947		-32.3158	0.346	4.10526
505	0.294	0.343	3.68421		-32.4211	0.346	4
510	0.294	0.344	3.78947		-32.4211	0.344	3.78947
515	0.297	0.347	3.78947		-32.7368	0.346	3.68421
520	0.295	0.347	4		-32.5263	0.35	4.31579
525	0.293	0.349	4.42105		-32.3158	0.35	4.52632
530	0.293	0.347	4.21053		-32.3158	0.351	4.63158
535	0.294	0.348	4.21053		-32.4211	0.351	4.52632
540	0.294	0.35	4.42105		-32.4211	0.353	4.73684
545	0.293	0.352	4.73684		-32.3158	0.354	4.94737
550	0.294	0.353	4.73684		-32.4211	0.358	5.26316
555	0.296	0.352	4.42105		-32.6316	0.356	4.84211
560	0.296	0.352	4.42105		-32.6316	0.356	4.84211
565	0.294	0.353	4.73684		-32.4211	0.358	5.26316
570	0.294	0.357	5.15789		-32.4211	0.357	5.15789
575	0.293	0.355	5.05263		-32.3158	0.357	5.26316
580	0.293	0.355	5.05263		-32.3158	0.36	5.57895
585	0.296	0.361	5.36842		-32.6316	0.357	4.94737
590	0.294	0.358	5.26316		-32.4211	0.361	5.57895
595	0.295	0.361	5.47368		-32.5263	0.361	5.47368
600	0.296	0.359	5.15789		-32.6316	0.359	5.15789
605	0.295	0.362	5.57895		-32.5263	0.365	5.89474
610	0.295	0.364	5.78947		-32.5263	0.366	6
615	0.295	0.365	5.89474		-32.5263	0.368	6.21053
620	0.295	0.365	5.89474		-32.5263	0.366	6
625	0.296	0.366	5.89474		-32.6316	0.369	6.21053
630	0.294	0.365	6		-32.4211	0.368	6.31579
635	0.293	0.369	6.52632		-32.3158	0.371	6.73684
640	0.296	0.369	6.21053		-32.6316	0.37	6.31579
645	0.295	0.37	6.42105		-32.5263	0.368	6.21053
650	0.296	0.372	6.52632		-32.6316	0.372	6.52632
655	0.295	0.373	6.73684		-32.5263	0.374	6.84211
660	0.296	0.374	6.73684		-32.6316	0.372	6.52632
665	0.296	0.374	6.73684		-32.6316	0.374	6.73684
670	0.296	0.376	6.94737		-32.6316	0.373	6.63158
675	0.294	0.375	7.05263		-32.4211	0.377	7.26316
680	0.295	0.379	7.36842		-32.5263	0.377	7.15789
685	0.296	0.381	7.47368		-32.6316	0.376	6.94737
690	0.298	0.38	7.15789		-32.8421	0.381	7.26316
695	0.295	0.381	7.57895		-32.5263	0.38	7.47368
700	0.298	0.383	7.47368		-32.8421	0.381	7.26316
705	0.296	0.384	7.78947		-32.6316	0.38	7.36842
710	0.296	0.384	7.78947		-32.6316	0.384	7.78947
715	0.295	0.388	8.31579		-32.5263	0.383	7.78947
720	0.297	0.385	7.78947		-32.7368	0.382	7.47368
725	0.293	0.386	8.31579		-32.3158	0.388	8.52632
730	0.294	0.388	8.42105		-32.4211	0.387	8.31579
735	0.296	0.387	8.10526		-32.6316	0.39	8.42105
740	0.297	0.386	7.89474		-32.7368	0.389	8.21053
745	0.295	0.39	8.52632		-32.5263	0.391	8.63158
750	0.295	0.391	8.63158		-32.5263	0.393	8.84211
755	0.298	0.393	8.52632		-32.8421	0.394	8.63158
760	0.296	0.394	8.84211		-32.6316	0.394	8.84211
765	0.295	0.393	8.84211		-32.5263	0.396	9.15789
770	0.295	0.395	9.05263		-32.5263	0.398	9.36842
775	0.296	0.397	9.15789		-32.6316	0.401	9.57895
780	0.295	0.395	9.05263		-32.5263	0.399	9.47368
785	0.295	0.396	9.15789		-32.5263	0.398	9.36842
790	0.294	0.399	9.57895		-32.4211	0.401	9.78947
795	0.293	0.4	9.78947		-32.3158	0.402	10
800	0.295	0.399	9.47368		-32.5263	0.404	10
805	0.297	0.398	9.15789		-32.7368	0.404	9.78947
810	0.293	0.4	9.78947		-32.3158	0.403	10.1053
815	0.295	0.4	9.57895		-32.5263	0.407	10.3158
820	0.297	0.399	9.26316		-32.7368	0.408	10.2105
825	0.294	0.401	9.78947		-32.4211	0.407	10.4211
830	0.296	0.404	9.89474		-32.6316	0.408	10.3158
835	0.295	0.403	9.89474		-32.5263	0.411	10.7368
840	0.296	0.405	10		-32.6316	0.408	10.3158
845	0.296	0.403	9.78947		-32.6316	0.413	10.8421
850	0.294	0.405	10.2105		-32.4211	0.412	10.9474
855	0.296	0.405	10		-32.6316	0.411	10.6316
860	0.295	0.405	10.1053		-32.5263	0.413	10.9474
865	0.298	0.409	10.2105		-32.8421	0.415	10.8421
870	0.297		-32.7368		-32.7368	0.414	10.8421
875	0.297		-32.7368		-32.7368	0.417	11.1579
880	0.296		-32.6316		-32.6316	0.418	11.3684
885	0.297		-32.7368		-32.7368	0.417	11.1579
890	0.295		-32.5263		-32.5263	0.42	11.6842
895	0.295		-32.5263		-32.5263	0.419	11.5789
900	0.297		-32.7368		-32.7368	0.419	11.3684
905	0.295		-32.5263		-32.5263	0.423	12
910	0.293		-32.3158		-32.3158	0.422	12.1053
915	0.296		-32.6316		-32.6316	0.422	11.7895
920	0.295		-32.5263		-32.5263	0.424	12.1053
925	0.296		-32.6316		-32.6316	0.425	12.1053
930	0.297		-32.7368		-32.7368	0.426	12.1053
935	0.299		-32.9474		-32.9474	0.428	12.1053
940	0.297		-32.7368		-32.7368	0.426	12.1053
945	0.296		-32.6316		-32.6316	0.429	12.5263
950	0.296		-32.6316		-32.6316	0.427	12.3158
955	0.294		-32.4211		-32.4211	0.428	12.6316
960	0.296		-32.6316		-32.6316	0.43	12.6316
965	0.296		-32.6316		-32.6316	0.428	12.4211
970	0.297		-32.7368		-32.7368	0.433	12.8421
975	0.293		-32.3158		-32.3158	0.433	13.2632
980	0.295		-32.5263		-32.5263	0.431	12.8421
985	0.293		-32.3158		-32.3158	0.431	13.0526
990	0.294		-32.4211		-32.4211	0.431	12.9474
995	0.296		-32.6316		-32.6316	0.432	12.8421
1000	0.295		-32.5263		-32.5263	0.434	13.1579
1005	0.296		-32.6316		-32.6316	0.434	13.0526
1010	0.295		-32.5263		-32.5263	0.436	13.3684
1015	0.295		-32.5263		-32.5263	0.435	13.2632
1020	0.295		-32.5263		-32.5263	0.435	13.2632
1025	0.294		-32.4211		-32.4211	0.435	13.3684
1030	0.294		-32.4211		-32.4211	0.435	13.3684
1035	0.295		-32.5263		-32.5263	0.436	13.3684
1040	0.296		-32.6316		-32.6316	0.437	13.3684
1045	0.295		-32.5263		-32.5263	0.437	13.4737
1050	0.297		-32.7368		-32.7368	0.436	13.1579
1055	0.295		-32.5263		-32.5263	0.438	13.5789
1060	0.296		-32.6316		-32.6316	0.439	13.5789
1065	0.296		-32.6316		-32.6316	0.435	13.1579
1070	0.295		-32.5263		-32.5263	0.439	13.6842
1075	0.295		-32.5263		-32.5263	0.439	13.6842
1080	0.297		-32.7368		-32.7368	0.439	13.4737
1085	0.295		-32.5263		-32.5263	0.442	14
1090	0.296		-32.6316		-32.6316	0.437	13.3684
1095	0.296		-32.6316		-32.6316	0.439	13.5789
1100	0.308		-33.8947		-33.8947	0.438	12.2105
1105	0.298		-32.8421		-32.8421	0.439	13.3684
1110	0.297		-32.7368		-32.7368	0.441	13.6842
1115	0.299		-32.9474		-32.9474	0.443	13.6842
1120	0.301		-33.1579		-33.1579	0.442	13.3684
1125	0.296		-32.6316		-32.6316	0.439	13.5789
1130	0.294		-32.4211		-32.4211	0.445	14.4211
1135	0.295		-32.5263		-32.5263	0.442	14
1140	0.294		-32.4211		-32.4211	0.44	13.8947
1145	0.294		-32.4211		-32.4211	0.44	13.8947
1150	0.294		-32.4211		-32.4211	0.441	14
1155	0.293		-32.3158		-32.3158	0.442	14.2105
1160	0.296		-32.6316		-32.6316	0.442	13.8947
1165	0.294		-32.4211		-32.4211	0.442	14.1053
1170	0.296		-32.6316		-32.6316	0.442	13.8947
1175	0.293		-32.3158		-32.3158	0.44	14
1180	0.296		-32.6316		-32.6316	0.441	13.7895
1185	0.295		-32.5263		-32.5263	0.443	14.1053
1190	0.296		-32.6316		-32.6316	0.444	14.1053
1195	0.296		-32.6316		-32.6316	0.445	14.2105
1200	0.294		-32.4211		-32.4211	0.445	14.4211
1205	0.294		-32.4211		-32.4211	0.442	14.1053
1210	0.297		-32.7368		-32.7368	0.445	14.1053
1215	0.298		-32.8421		-32.8421	0.444	13.8947
1220	0.294		-32.4211		-32.4211	0.445	14.4211
1225	0.294		-32.4211		-32.4211	0.444	14.3158
1230	0.296		-32.6316		-32.6316	0.443	14
1235	0.293		-32.3158		-32.3158	0.444	14.4211
1240	0.293		-32.3158		-32.3158	0.447	14.7368
1245	0.295		-32.5263		-32.5263	0.447	14.5263
1250	0.292		-32.2105		-32.2105	0.444	14.5263
1255	0.296		-32.6316		-32.6316	0.446	14.3158
1260	0.296		-32.6316		-32.6316	0.448	14.5263
1265	0.296		-32.6316		-32.6316	0.451	14.8421
1270	0.294		-32.4211		-32.4211	0.446	14.5263
1275	0.297		-32.7368		-32.7368	0.451	14.7368
1280	0.296		-32.6316		-32.6316	0.446	14.3158
1285	0.297		-32.7368		-32.7368	0.451	14.7368
1290	0.295		-32.5263		-32.5263	0.446	14.4211
1295	0.296		-32.6316		-32.6316	0.448	14.5263
1300	0.296		-32.6316		-32.6316	0.447	14.4211
1305	0.294		-32.4211		-32.4211	0.45	14.9474
1310	0.296		-32.6316		-32.6316	0.447	14.4211
1315	0.297		-32.7368		-32.7368	0.446	14.2105
1320	0.297		-32.7368		-32.7368	0.453	14.9474
1325	0.297		-32.7368		-32.7368	0.451	14.7368
1330	0.296		-32.6316		-32.6316	0.452	14.9474
1335	0.296		-32.6316		-32.6316	0.452	14.9474
1340	0.294		-32.4211		-32.4211	0.45	14.9474
1345	0.294		-32.4211		-32.4211	0.452	15.1579
1350	0.297		-32.7368		-32.7368	0.453	14.9474
1355	0.295		-32.5263		-32.5263	0.452	15.0526
1360	0.297		-32.7368		-32.7368	0.45	14.6316
1365	0.296		-32.6316		-32.6316	0.452	14.9474
1370	0.294		-32.4211		-32.4211	0.451	15.0526
1375	0.294		-32.4211		-32.4211	0.458	15.7895
1380	0.297		-32.7368		-32.7368	0.453	14.9474
1385	0.294		-32.4211		-32.4211	0.455	15.4737
1390	0.294		-32.4211		-32.4211	0.452	15.1579
1395	0.294		-32.4211		-32.4211	0.458	15.7895
1400	0.296		-32.6316		-32.6316	0.456	15.3684
1405	0.295		-32.5263		-32.5263	0.457	15.5789
1410	0.295		-32.5263		-32.5263	0.457	15.5789
1415	0.296		-32.6316		-32.6316	0.458	15.5789
1420	0.296		-32.6316		-32.6316	0.458	15.5789
1425	0.295		-32.5263		-32.5263	0.454	15.2632
1430	0.297		-32.7368		-32.7368	0.457	15.3684
1435	0.296		-32.6316		-32.6316	0.458	15.5789
1440	0.297		-32.7368		-32.7368	0.456	15.2632
1445	0.296		-32.6316		-32.6316	0.457	15.4737
1450	0.297		-32.7368		-32.7368	0.458	15.4737
1455	0.293		-32.3158		-32.3158	0.459	16
1460	0.297		-32.7368		-32.7368	0.462	15.8947
1465	0.294		-32.4211		-32.4211	0.462	16.2105
1470	0.293		-32.3158		-32.3158	0.46	16.1053
1475	0.297		-32.7368		-32.7368	0.46	15.6842
1480	0.295		-32.5263		-32.5263	0.46	15.8947
1485	0.297		-32.7368		-32.7368	0.463	16
1490	0.298		-32.8421		-32.8421	0.46	15.5789
1495	0.296		-32.6316		-32.6316	0.461	15.8947
1500	0.299		-32.9474		-32.9474	0.46	15.4737
1505	0.296		-32.6316		-32.6316	0.46	15.7895
1510	0.294		-32.4211		-32.4211	0.464	16.4211
1515	0.295		-32.5263		-32.5263	0.462	16.1053
1520	0.297		-32.7368		-32.7368	0.464	16.1053
1525	0.297		-32.7368		-32.7368	0.463	16
1530	0.296		-32.6316		-32.6316	0.461	15.8947
1535	0.296		-32.6316		-32.6316	0.465	16.3158
1540	0.298		-32.8421		-32.8421	0.465	16.1053
1545	0.297		-32.7368		-32.7368	0.465	16.2105
1550	0.296		-32.6316		-32.6316	0.465	16.3158
1555	0.296		-32.6316		-32.6316	0.464	16.2105
1560	0.299		-32.9474		-32.9474	0.465	16
1565	0.297		-32.7368		-32.7368	0.463	16
1570	0.299		-32.9474		-32.9474	0.466	16.1053
1575	0.296		-32.6316		-32.6316	0.466	16.4211
1580	0.296		-32.6316		-32.6316	0.464	16.2105
1585	0.295		-32.5263		-32.5263	0.465	16.4211
1590	0.296		-32.6316		-32.6316	0.466	16.4211
1595	0.298		-32.8421		-32.8421	0.467	16.3158
1600	0.294		-32.4211		-32.4211	0.466	16.6316
1605	0.296		-32.6316		-32.6316	0.466	16.4211
1610	0.296		-32.6316		-32.6316	0.467	16.5263
1615	0.297		-32.7368		-32.7368	0.469	16.6316
1620	0.294		-32.4211		-32.4211	0.469	16.9474
1625	0.296		-32.6316		-32.6316	0.466	16.4211
1630	0.296		-32.6316		-32.6316	0.471	16.9474
1635	0.296		-32.6316		-32.6316	0.472	17.0526
1640	0.297		-32.7368		-32.7368	0.472	16.9474
1645	0.296		-32.6316		-32.6316	0.469	16.7368
1650	0.295		-32.5263		-32.5263	0.469	16.8421
1655	0.295		-32.5263		-32.5263	0.469	16.8421
1660	0.297		-32.7368		-32.7368	0.472	16.9474
1665	0.297		-32.7368		-32.7368	0.474	17.1579
1670	0.296		-32.6316		-32.6316	0.472	17.0526
1675	0.294		-32.4211		-32.4211	0.472	17.2632
1680	0.298		-32.8421		-32.8421	0.471	16.7368
1685	0.296		-32.6316		-32.6316	0.472	17.0526
1690	0.296		-32.6316		-32.6316	0.476	17.4737
1695	0.294		-32.4211		-32.4211	0.472	17.2632
1700	0.295		-32.5263		-32.5263	0.473	17.2632
1705	0.294		-32.4211		-32.4211	0.474	17.4737
1710	0.295		-32.5263		-32.5263	0.476	17.5789
1715	0.295		-32.5263		-32.5263	0.476	17.5789
1720	0.298		-32.8421		-32.8421	0.473	16.9474
1725	0.295		-32.5263		-32.5263	0.474	17.3684
1730	0.297		-32.7368		-32.7368	0.475	17.2632
1735	0.294		-32.4211		-32.4211	0.474	17.4737
1740	0.297		-32.7368		-32.7368	0.474	17.1579
1745	0.296		-32.6316		-32.6316	0.477	17.5789
1750	0.296		-32.6316		-32.6316	0.475	17.3684
1755	0.295		-32.5263		-32.5263	0.475	17.4737
1760	0.298		-32.8421		-32.8421	0.48	17.6842
1765	0.294		-32.4211		-32.4211	0.474	17.4737
1770	0.297		-32.7368		-32.7368	0.477	17.4737
1775	0.295		-32.5263		-32.5263	0.476	17.5789
1780	0.295		-32.5263		-32.5263	0.48	18
1785	0.299		-32.9474		-32.9474	0.477	17.2632
1790	0.295		-32.5263		-32.5263	0.478	17.7895
1795	0.296		-32.6316		-32.6316	0.481	18
1800	0.297		-32.7368		-32.7368	0.478	17.5789

## Sheet: 3000Dtu_Mo
Time (sec)	BG_OD360	1st_OD360	1st_ΔPi con. (μM)	2nd_OD360	2nd_ΔPi con. (μM)	3rd_OD360	3rd_ΔPi con. (μM)
	0.091	0.082		0.081		0.094
5	0.108	0.102	-2.10526	0.1	-2.31579	0.114	-0.842105
10	0.123	0.118	-2	0.116	-2.21053	0.129	-0.842105
15	0.139	0.134	-2	0.13	-2.42105	0.145	-0.842105
20	0.154	0.151	-1.78947	0.145	-2.42105	0.159	-0.947368
25	0.165	0.167	-1.26316	0.159	-2.10526	0.172	-0.736842
30	0.179	0.192	-0.105263	0.171	-2.31579	0.185	-0.842105
35	0.188	0.189	-1.36842	0.182	-2.10526	0.195	-0.736842
40	0.2	0.199	-1.57895	0.192	-2.31579	0.207	-0.736842
45	0.21	0.211	-1.36842	0.202	-2.31579	0.217	-0.736842
50	0.217	0.22	-1.15789	0.214	-1.78947	0.226	-0.526316
55	0.227	0.229	-1.26316	0.222	-2	0.234	-0.736842
60	0.233	0.236	-1.15789	0.232	-1.57895	0.244	-0.315789
65	0.239	0.244	-0.947368	0.237	-1.68421	0.249	-0.421053
70	0.245	0.249	-1.05263	0.245	-1.47368	0.256	-0.315789
75	0.253	0.257	-1.05263	0.251	-1.68421	0.27	0.315789
80	0.257	0.263	-0.842105	0.258	-1.36842	0.267	-0.421053
85	0.26	0.269	-0.526316	0.261	-1.36842	0.274	1.27822e-15
90	0.264	0.274	-0.421053	0.265	-1.36842	0.277	-0.105263
95	0.268	0.277	-0.526316	0.27	-1.26316	0.281	-0.105263
100	0.271	0.281	-0.421053	0.278	-0.736842	0.287	0.210526
105	0.274	0.285	-0.315789	0.281	-0.736842	0.29	0.210526
110	0.278	0.285	-0.736842	0.286	-0.631579	0.294	0.210526
115	0.279	0.293	-4.56506e-15	0.287	-0.631579	0.295	0.210526
120	0.283	0.295	-0.210526	0.289	-0.842105	0.297	1.27822e-15
125	0.285	0.3	0.105263	0.295	-0.421053	0.302	0.315789
130	0.288	0.302	1.27822e-15	0.295	-0.736842	0.304	0.210526
135	0.286	0.3	1.27822e-15	0.298	-0.210526	0.305	0.526316
140	0.287	0.299	-0.210526	0.302	0.105263	0.307	0.631579
145	0.291	0.304	-0.105263	0.304	-0.105263	0.307	0.210526
150	0.289	0.304	0.105263	0.303	1.27822e-15	0.31	0.736842
155	0.293	0.307	1.27822e-15	0.304	-0.315789	0.311	0.421053
160	0.291	0.309	0.421053	0.307	0.210526	0.313	0.842105
165	0.292	0.31	0.421053	0.311	0.526316	0.314	0.842105
170	0.294	0.309	0.105263	0.311	0.315789	0.314	0.631579
175	0.295	0.311	0.210526	0.311	0.210526	0.317	0.842105
180	0.294	0.311	0.315789	0.313	0.526316	0.317	0.947368
185	0.297	0.312	0.105263	0.311	1.27822e-15	0.317	0.631579
190	0.296	0.311	0.105263	0.314	0.421053	0.316	0.631579
195	0.297	0.312	0.105263	0.313	0.210526	0.316	0.526316
200	0.295	0.312	0.315789	0.315	0.631579	0.319	1.05263
205	0.298	0.311	-0.105263	0.312	1.27822e-15	0.317	0.526316
210	0.297	0.312	0.105263	0.317	0.631579	0.318	0.736842
215	0.296	0.312	0.210526	0.314	0.421053	0.319	0.947368
220	0.299	0.313	1.27822e-15	0.318	0.526316	0.318	0.526316
225	0.296	0.314	0.421053	0.316	0.631579	0.32	1.05263
230	0.297	0.315	0.421053	0.316	0.526316	0.317	0.631579
235	0.3	0.314	1.27822e-15	0.317	0.315789	0.318	0.421053
240	0.298	0.313	0.105263	0.318	0.631579	0.32	0.842105
245	0.3	-0.136	-47.3684	0.317	0.315789	-0.676	-104.211
250	0.3	-0.65	-101.474	-0.676	-104.211	-0.674	-104
255	0.299	0.315	0.210526	-0.675	-104	0.326	1.36842
260	0.299	0.316	0.315789	0.323	1.05263	0.327	1.47368
265	0.296	0.32	1.05263	0.322	1.26316	0.327	1.78947
270	0.298	0.319	0.736842	0.324	1.26316	0.33	1.89474
275	0.3	0.324	1.05263	0.323	0.947368	0.329	1.57895
280	0.298	0.324	1.26316	0.327	1.57895	0.333	2.21053
285	0.299	0.327	1.47368	0.328	1.57895	0.331	1.89474
290	0.3	0.329	1.57895	0.327	1.36842	0.333	2
295	0.299	0.333	2.10526	0.33	1.78947	0.335	2.31579
300	0.298	0.334	2.31579	0.332	2.10526	0.339	2.84211
305	0.298	0.336	2.52632	0.33	1.89474	0.337	2.63158
310	0.3	0.34	2.73684	0.331	1.78947	0.337	2.42105
315	0.3	0.342	2.94737	0.333	2	0.34	2.73684
320	0.299	0.344	3.26316	0.335	2.31579	0.345	3.36842
325	0.298	0.349	3.89474	0.335	2.42105	0.346	3.57895
330	0.3	0.35	3.78947	0.337	2.42105	0.345	3.26316
335	0.299	0.35	3.89474	0.336	2.42105	0.347	3.57895
340	0.297	0.354	4.52632	0.337	2.73684	0.348	3.89474
345	0.298	0.358	4.84211	0.339	2.84211	0.35	4
350	0.299	0.359	4.84211	0.338	2.63158	0.351	4
355	0.3	0.359	4.73684	0.342	2.94737	0.351	3.89474
360	0.298	0.363	5.36842	0.343	3.26316	0.354	4.42105
365	0.3	0.366	5.47368	0.345	3.26316	0.357	4.52632
370	0.3	0.367	5.57895	0.345	3.26316	0.357	4.52632
375	0.3	0.369	5.78947	0.348	3.57895	0.357	4.52632
380	0.299	0.374	6.42105	0.348	3.68421	0.358	4.73684
385	0.3	0.373	6.21053	0.347	3.47368	0.359	4.73684
390	0.3	0.378	6.73684	0.35	3.78947	0.361	4.94737
395	0.298	0.378	6.94737	0.351	4.10526	0.362	5.26316
400	0.299	0.382	7.26316	0.353	4.21053	0.367	5.68421
405	0.299	0.385	7.57895	0.354	4.31579	0.364	5.36842
410	0.301	0.388	7.68421	0.356	4.31579	0.367	5.47368
415	0.301	0.389	7.78947	0.358	4.52632	0.373	6.10526
420	0.299	0.393	8.42105	0.357	4.63158	0.369	5.89474
425	0.3	0.395	8.52632	0.36	4.84211	0.371	6
430	0.299	0.396	8.73684	0.359	4.84211	0.374	6.42105
435	0.301	0.401	9.05263	0.363	5.05263	0.375	6.31579
440	0.301	0.402	9.15789	0.362	4.94737	0.373	6.10526
445	0.301	0.406	9.57895	0.367	5.47368	0.377	6.52632
450	0.3	0.406	9.68421	0.367	5.57895	0.379	6.84211
455	0.301	0.411	10.1053	0.37	5.78947	0.379	6.73684
460	0.301	0.415	10.5263	0.37	5.78947	0.383	7.15789
465	0.301	0.416	10.6316	0.376	6.42105	0.386	7.47368
470	0.298	0.417	11.0526	0.377	6.84211	0.386	7.78947
475	0.299	0.419	11.1579	0.375	6.52632	0.386	7.68421
480	0.301	0.422	11.2632	0.382	7.05263	0.388	7.68421
485	0.3	0.425	11.6842	0.383	7.26316	0.39	8
490	0.302	0.428	11.7895	0.382	6.94737	0.391	7.89474
495	0.3	0.43	12.2105	0.384	7.36842	0.394	8.42105
500	0.302	0.447	13.7895	0.39	7.78947	0.395	8.31579
505	0.303	0.436	12.5263	0.392	7.89474	0.394	8.10526
510	0.302	0.439	12.9474	0.391	7.89474	0.397	8.52632
515	0.302	0.441	13.1579	0.39	7.78947	0.397	8.52632
520	0.3	0.442	13.4737	0.395	8.52632	0.399	8.94737
525	0.3	0.443	13.5789	0.395	8.52632	0.405	9.57895
530	0.3	0.446	13.8947	0.398	8.84211	0.405	9.57895
535	0.3	0.449	14.2105	0.4	9.05263	0.41	10.1053
540	0.302	0.455	14.6316	0.404	9.26316	0.41	9.89474
545	0.299	0.456	15.0526	0.405	9.68421	0.408	10
550	0.301	0.458	15.0526	0.408	9.78947	0.415	10.5263
555	0.299	0.461	15.5789	0.408	10	0.417	10.9474
560	0.301	0.463	15.5789	0.411	10.1053	0.418	10.8421
565	0.302	0.463	15.4737	0.411	10	0.419	10.8421
570	0.302	0.47	16.2105	0.414	10.3158	0.419	10.8421
575	0.3	0.471	16.5263	0.415	10.6316	0.421	11.2632
580	0.301	0.474	16.7368	0.417	10.7368	0.424	11.4737
585	0.3	0.475	16.9474	0.422	11.3684	0.427	11.8947
590	0.302	0.477	16.9474	0.424	11.3684	0.429	11.8947
595	0.301	0.482	17.5789	0.424	11.4737	0.428	11.8947
600	0.301	0.483	17.6842	0.428	11.8947	0.431	12.2105
605	0.302	0.484	17.6842	0.426	11.5789	0.434	12.4211
610	0.301	0.486	18	0.431	12.2105	0.437	12.8421
615	0.3	0.492	18.7368	0.434	12.6316	0.436	12.8421
620	0.302	0.494	18.7368	0.436	12.6316	0.436	12.6316
625	0.3	0.497	19.2632	0.437	12.9474	0.442	13.4737
630	0.3	0.499	19.4737	0.444	13.6842	0.442	13.4737
635	0.301	0.501	19.5789	0.443	13.4737	0.445	13.6842
640	0.298	0.503	20.1053	0.442	13.6842	0.445	14
645	0.302	0.506	20	0.446	13.6842	0.446	13.6842
650	0.303	0.508	20.1053	0.445	13.4737	0.449	13.8947
655	0.296	0.507	20.7368	0.451	14.8421	0.451	14.8421
660	0.303	0.512	20.5263	0.451	14.1053	0.452	14.2105
665	0.304	0.514	20.6316	0.459	14.8421	0.452	14.1053
670	0.302	0.516	21.0526	0.458	14.9474	0.458	14.9474
675	0.3	0.518	21.4737	0.458	15.1579	0.46	15.3684
680	0.299	0.524	22.2105	0.459	15.3684	0.455	14.9474
685	0.301	0.523	21.8947	0.463	15.5789	0.462	15.4737
690	0.303	0.527	22.1053	0.468	15.8947	0.466	15.6842
695	0.302	0.528	22.3158	0.469	16.1053	0.465	15.6842
700	0.302	0.533	22.8421	0.47	16.2105	0.467	15.8947
705	0.301	0.535	23.1579	0.473	16.6316	0.471	16.4211
710	0.302	0.536	23.1579	0.476	16.8421	0.472	16.4211
715	0.3	0.536	23.3684	0.479	17.3684	0.476	17.0526
720	0.3	0.541	23.8947	0.48	17.4737	0.475	16.9474
725	0.299	0.539	23.7895	0.486	18.2105	0.479	17.4737
730	0.302	0.544	24	0.485	17.7895	0.478	17.0526
735	0.302	0.545	24.1053	0.487	18	0.484	17.6842
740	0.301	0.549	24.6316	0.491	18.5263	0.481	17.4737
745	0.304	0.551	24.5263	0.491	18.2105	0.485	17.5789
750	0.301	0.551	24.8421	0.497	19.1579	0.487	18.1053
755	0.302	0.556	25.2632	0.496	18.9474	0.489	18.2105
760	0.301	0.557	25.4737	0.499	19.3684	0.489	18.3158
765	0.304	0.562	25.6842	0.504	19.5789	0.493	18.4211
770	0.301	0.563	26.1053	0.502	19.6842	0.492	18.6316
775	0.312	0.564	25.0526	0.508	19.1579	0.496	17.8947
780	0.303	0.566	26.2105	0.509	20.2105	0.497	18.9474
785	0.304	0.566	26.1053	0.514	20.6316	0.501	19.2632
790	0.3	0.57	26.9474	0.515	21.1579	0.501	19.6842
795	0.304	0.57	26.5263	0.518	21.0526	0.506	19.7895
800	0.302	0.571	26.8421	0.522	21.6842	0.506	20
805	0.301	0.576	27.4737	0.525	22.1053	0.51	20.5263
810	0.302	0.577	27.4737	0.522	21.6842	0.507	20.1053
815	0.303	0.579	27.5789	0.528	22.2105	0.51	20.3158
820	0.303	0.581	27.7895	0.531	22.5263	0.514	20.7368
825	0.305	0.581	27.5789	0.533	22.5263	0.515	20.6316
830	0.303	0.584	28.1053	0.537	23.1579	0.518	21.1579
835	0.302	0.591	28.9474	0.534	22.9474	0.519	21.3684
840	0.301		-33.1579	0.542	23.8947	0.522	21.7895
845	0.3		-33.0526	0.539	23.6842	0.524	22.1053
850	0.302		-33.2632	0.546	24.2105	0.527	22.2105
855	0.302		-33.2632	0.548	24.4211	0.531	22.6316
860	0.302		-33.2632	0.551	24.7368	0.533	22.8421
865	0.3		-33.0526	0.549	24.7368	0.534	23.1579
870	0.3		-33.0526	0.556	25.4737	0.535	23.2632
875	0.303		-33.3684	0.557	25.2632	0.537	23.1579
880	0.302		-33.2632	0.561	25.7895	0.54	23.5789
885	0.3		-33.0526	0.56	25.8947	0.542	24
890	0.302		-33.2632	0.563	26	0.544	24
895	0.302		-33.2632	0.565	26.2105	0.545	24.1053
900	0.299		-32.9474	0.568	26.8421	0.549	24.8421
905	0.3		-33.0526	0.571	27.0526		-33.0526
910	0.303		-33.3684	0.575	27.1579		-33.3684
915	0.301		-33.1579	0.575	27.3684		-33.1579
920	0.303		-33.3684	0.575	27.1579		-33.3684
925	0.301		-33.1579	0.579	27.7895		-33.1579
930	0.301		-33.1579	0.576	27.4737		-33.1579
935	0.301		-33.1579	0.582	28.1053		-33.1579
940	0.298		-32.8421	0.578	28		-32.8421
945	0.3		-33.0526	0.583	28.3158		-33.0526
950	0.3		-33.0526	0.583	28.3158		-33.0526
955	0.302		-33.2632	0.586	28.4211		-33.2632
960	0.301		-33.1579	0.591	29.0526		-33.1579
965	0.3		-33.0526	0.589	28.9474		-33.0526
970	0.301		-33.1579	0.591	29.0526		-33.1579
975	0.302		-33.2632	0.594	29.2632		-33.2632
980	0.303		-33.3684	0.591	28.8421		-33.3684
985	0.302		-33.2632	0.592	29.0526		-33.2632
990	0.3		-33.0526	0.599	30		-33.0526
995	0.3		-33.0526	0.597	29.7895		-33.0526
1000	0.3		-33.0526	0.603	30.4211		-33.0526
1005	0.3		-33.0526	0.594	29.4737		-33.0526
1010	0.3		-33.0526	0.602	30.3158		-33.0526
1015	0.297		-32.7368	0.602	30.6316		-32.7368
1020	0.297		-32.7368	0.601	30.5263		-32.7368
1025	0.297		-32.7368	0.598	30.2105		-32.7368
1030	0.301		-33.1579	0.605	30.5263		-33.1579
1035	0.299		-32.9474	0.605	30.7368		-32.9474
1040	0.298		-32.8421	0.604	30.7368		-32.8421
1045	0.297		-32.7368	0.614	31.8947		-32.7368
1050	0.3		-33.0526	0.61	31.1579		-33.0526
1055	0.299		-32.9474	0.611	31.3684		-32.9474
1060	0.3		-33.0526	0.614	31.5789		-33.0526
1065	0.3		-33.0526	0.609	31.0526		-33.0526
1070	0.299		-32.9474	0.612	31.4737		-32.9474
1075	0.297		-32.7368	0.613	31.7895		-32.7368
1080	0.298		-32.8421	0.613	31.6842		-32.8421
1085	0.3		-33.0526	0.619	32.1053		-33.0526
1090	0.299		-32.9474	0.618	32.1053		-32.9474
1095	0.301		-33.1579	0.62	32.1053		-33.1579
1100	0.3		-33.0526	0.616	31.7895		-33.0526
1105	0.298		-32.8421	0.619	32.3158		-32.8421
1110	0.3		-33.0526	0.624	32.6316		-33.0526
1115	0.299		-32.9474	0.619	32.2105		-32.9474
1120	0.3		-33.0526	0.621	32.3158		-33.0526
1125	0.298		-32.8421	0.621	32.5263		-32.8421
1130	0.3		-33.0526	0.628	33.0526		-33.0526
1135	0.298		-32.8421	0.626	33.0526		-32.8421
1140	0.298		-32.8421	0.626	33.0526		-32.8421
1145	0.298		-32.8421	0.63	33.4737		-32.8421
1150	0.298		-32.8421	0.628	33.2632		-32.8421
1155	0.301		-33.1579	0.628	32.9474		-33.1579
1160	0.298		-32.8421	0.63	33.4737		-32.8421
1165	0.299		-32.9474	0.635	33.8947		-32.9474
1170	0.299		-32.9474	0.629	33.2632		-32.9474
1175	0.3		-33.0526	0.634	33.6842		-33.0526
1180	0.297		-32.7368	0.633	33.8947		-32.7368
1185	0.297		-32.7368	0.632	33.7895		-32.7368
1190	0.299		-32.9474	0.635	33.8947		-32.9474
1195	0.296		-32.6316	0.636	34.3158		-32.6316
1200	0.299		-32.9474	0.635	33.8947		-32.9474
1205	0.298		-32.8421	0.637	34.2105		-32.8421
1210	0.297		-32.7368	0.638	34.4211		-32.7368
1215	0.299		-32.9474	0.641	34.5263		-32.9474
1220	0.298		-32.8421	0.641	34.6316		-32.8421
1225	0.299		-32.9474	0.638	34.2105		-32.9474
1230	0.296		-32.6316	0.641	34.8421		-32.6316
1235	0.3		-33.0526	0.636	33.8947		-33.0526
1240	0.297		-32.7368	0.64	34.6316		-32.7368
1245	0.298		-32.8421	0.642	34.7368		-32.8421
1250	0.299		-32.9474	0.647	35.1579		-32.9474
1255	0.297		-32.7368	0.642	34.8421		-32.7368
1260	0.297		-32.7368	0.645	35.1579		-32.7368
1265	0.3		-33.0526	0.645	34.8421		-33.0526
1270	0.296		-32.6316	0.642	34.9474		-32.6316
1275	0.3		-33.0526	0.647	35.0526		-33.0526
1280	0.3		-33.0526	0.646	34.9474		-33.0526
1285	0.297		-32.7368	0.647	35.3684		-32.7368
1290	0.297		-32.7368	0.649	35.5789		-32.7368
1295	0.298		-32.8421	0.649	35.4737		-32.8421
1300	0.298		-32.8421	0.652	35.7895		-32.8421
1305	0.3		-33.0526	0.648	35.1579		-33.0526
1310	0.299		-32.9474	0.653	35.7895		-32.9474
1315	0.299		-32.9474	0.658	36.3158		-32.9474
1320	0.296		-32.6316	0.655	36.3158		-32.6316
1325	0.298		-32.8421	0.653	35.8947		-32.8421
1330	0.298		-32.8421	0.655	36.1053		-32.8421
1335	0.301		-33.1579	0.654	35.6842		-33.1579
1340	0.297		-32.7368	0.66	36.7368		-32.7368
1345	0.299		-32.9474	0.656	36.1053		-32.9474
1350	0.299		-32.9474	0.658	36.3158		-32.9474
1355	0.297		-32.7368	0.657	36.4211		-32.7368
1360	0.299		-32.9474	0.657	36.2105		-32.9474
1365	0.298		-32.8421	0.659	36.5263		-32.8421
1370	0.301		-33.1579	0.661	36.4211		-33.1579
1375	0.3		-33.0526	0.658	36.2105		-33.0526
1380	0.302		-33.2632	0.666	36.8421		-33.2632
1385	0.299		-32.9474	0.659	36.4211		-32.9474
1390	0.301		-33.1579	0.663	36.6316		-33.1579
1395	0.299		-32.9474	0.659	36.4211		-32.9474
1400	0.3		-33.0526	0.661	36.5263		-33.0526
1405	0.301		-33.1579	0.665	36.8421		-33.1579
1410	0.3		-33.0526	0.667	37.1579		-33.0526
1415	0.301		-33.1579	0.662	36.5263		-33.1579
1420	0.301		-33.1579	0.665	36.8421		-33.1579
1425	0.3		-33.0526	0.667	37.1579		-33.0526
1430	0.303		-33.3684	0.666	36.7368		-33.3684
1435	0.3		-33.0526	0.669	37.3684		-33.0526
1440	0.303		-33.3684	0.67	37.1579		-33.3684
1445	0.295		-32.5263	0.671	38.1053		-32.5263
1450	0.301		-33.1579	0.668	37.1579		-33.1579
1455	0.303		-33.3684	0.67	37.1579		-33.3684
1460	0.3		-33.0526	0.673	37.7895		-33.0526
1465	0.301		-33.1579	0.677	38.1053		-33.1579
1470	0.3		-33.0526	0.674	37.8947		-33.0526
1475	0.298		-32.8421	0.667	37.3684		-32.8421
1480	0.298		-32.8421	0.671	37.7895		-32.8421
1485	0.299		-32.9474	0.674	38		-32.9474
1490	0.3		-33.0526	0.673	37.7895		-33.0526
1495	0.298		-32.8421	0.675	38.2105		-32.8421
1500	0.301		-33.1579	0.672	37.5789		-33.1579
1505	0.303		-33.3684	0.676	37.7895		-33.3684
1510	0.3		-33.0526	0.674	37.8947		-33.0526
1515	0.298		-32.8421	0.675	38.2105		-32.8421
1520	0.303		-33.3684	0.677	37.8947		-33.3684
1525	0.299		-32.9474	0.677	38.3158		-32.9474
1530	0.297		-32.7368	0.678	38.6316		-32.7368
1535	0.301		-33.1579	0.681	38.5263		-33.1579
1540	0.301		-33.1579	0.678	38.2105		-33.1579
1545	0.299		-32.9474	0.678	38.4211		-32.9474
1550	0.301		-33.1579	0.679	38.3158		-33.1579
1555	0.301		-33.1579	0.681	38.5263		-33.1579
1560	0.299		-32.9474	0.682	38.8421		-32.9474
1565	0.302		-33.2632	0.683	38.6316		-33.2632
1570	0.298		-32.8421	0.685	39.2632		-32.8421
1575	0.301		-33.1579	0.683	38.7368		-33.1579
1580	0.301		-33.1579	0.685	38.9474		-33.1579
1585	0.301		-33.1579	0.688	39.2632		-33.1579
1590	0.301		-33.1579	0.687	39.1579		-33.1579
1595	0.302		-33.2632		-33.2632		-33.2632
1600	0.299		-32.9474		-32.9474		-32.9474
1605	0.301		-33.1579		-33.1579		-33.1579
1610	0.301		-33.1579		-33.1579		-33.1579
1615	0.3		-33.0526		-33.0526		-33.0526
1620	0.299		-32.9474		-32.9474		-32.9474
1625	0.3		-33.0526		-33.0526		-33.0526
1630	0.299		-32.9474		-32.9474		-32.9474
1635	0.298		-32.8421		-32.8421		-32.8421
1640	0.303		-33.3684		-33.3684		-33.3684
1645	0.3		-33.0526		-33.0526		-33.0526
1650	0.299		-32.9474		-32.9474		-32.9474
1655	0.302		-33.2632		-33.2632		-33.2632
1660	0.3		-33.0526		-33.0526		-33.0526
1665	0.3		-33.0526		-33.0526		-33.0526
1670	0.301		-33.1579		-33.1579		-33.1579
1675	0.298		-32.8421		-32.8421		-32.8421
1680	0.3		-33.0526		-33.0526		-33.0526
1685	0.3		-33.0526		-33.0526		-33.0526
1690	0.3		-33.0526		-33.0526		-33.0526
1695	0.3		-33.0526		-33.0526		-33.0526
1700	0.302		-33.2632		-33.2632		-33.2632
1705	0.302		-33.2632		-33.2632		-33.2632
1710	0.301		-33.1579		-33.1579		-33.1579
1715	0.302		-33.2632		-33.2632		-33.2632
1720	0.299		-32.9474		-32.9474		-32.9474
1725	0.301		-33.1579		-33.1579		-33.1579
1730	0.3		-33.0526		-33.0526		-33.0526
1735	0.3		-33.0526		-33.0526		-33.0526
1740	0.3		-33.0526		-33.0526		-33.0526
1745	0.302		-33.2632		-33.2632		-33.2632
1750	0.3		-33.0526		-33.0526		-33.0526
1755	0.299		-32.9474		-32.9474		-32.9474
1760	0.3		-33.0526		-33.0526		-33.0526
1765	0.301		-33.1579		-33.1579		-33.1579
1770	0.3		-33.0526		-33.0526		-33.0526
1775	0.301		-33.1579		-33.1579		-33.1579
1780	0.301		-33.1579		-33.1579		-33.1579
1785	0.299		-32.9474		-32.9474		-32.9474
1790	0.302		-33.2632		-33.2632		-33.2632
1795	0.3		-33.0526		-33.0526		-33.0526
1800	0.301		-33.1579		-33.1579		-33.1579

## Sheet: 10000Dtu_Mo
Time (sec)	BG_OD360	1st_OD360	1st_ΔPi con. (μM)	2nd_OD360	2nd_ΔPi con. (μM)	3rd_OD360	3rd_ΔPi con. (μM)
	0.103	0.101		0.099		0.082
5	0.123	0.118	-2	0.114	-2.42105	0.1	-3.89474
10	0.138	0.136	-1.68421	0.131	-2.21053	0.117	-3.68421
15	0.152	0.15	-1.68421	0.147	-2	0.133	-3.47368
20	0.169	0.164	-2	0.163	-2.10526	0.147	-3.78947
25	0.18	0.176	-1.89474	0.176	-1.89474	0.16	-3.57895
30	0.193	0.188	-2	0.187	-2.10526	0.174	-3.47368
35	0.202	0.199	-1.78947	0.199	-1.78947	0.185	-3.26316
40	0.211	0.209	-1.68421	0.208	-1.78947	0.196	-3.05263
45	0.222	0.217	-2	0.216	-2.10526	0.208	-2.94737
50	0.23	0.228	-1.68421	0.226	-1.89474	0.215	-3.05263
55	0.239	0.236	-1.78947	0.235	-1.89474	0.227	-2.73684
60	0.246	0.244	-1.68421	0.242	-1.89474	0.238	-2.31579
65	0.254	0.251	-1.78947	0.25	-1.89474	0.243	-2.63158
70	0.26	0.26	-1.47368	0.255	-2	0.25	-2.52632
75	0.266	0.265	-1.57895	0.262	-1.89474	0.259	-2.21053
80	0.275	0.27	-2	0.268	-2.21053	0.269	-2.10526
85	0.278	0.276	-1.68421	0.272	-2.10526	0.271	-2.21053
90	0.283	0.28	-1.78947	0.275	-2.31579	0.277	-2.10526
95	0.286	0.285	-1.57895	0.28	-2.10526	0.285	-1.57895
100	0.288	0.286	-1.68421	0.286	-1.68421	0.288	-1.47368
105	0.292	0.294	-1.26316	0.287	-2	0.293	-1.36842
110	0.296	0.295	-1.57895	0.29	-2.10526	0.295	-1.57895
115	0.299	0.299	-1.47368	0.294	-2	0.302	-1.15789
120	0.299	0.302	-1.15789	0.295	-1.89474	0.303	-1.05263
125	0.305	0.305	-1.47368	0.295	-2.52632	0.308	-1.15789
130	0.305	0.305	-1.47368	0.302	-1.78947	0.311	-0.842105
135	0.306	0.31	-1.05263	0.302	-1.89474	0.315	-0.526316
140	0.308	0.309	-1.36842	0.303	-2	0.315	-0.736842
145	0.309	0.311	-1.26316	0.303	-2.10526	0.318	-0.526316
150	0.313	0.311	-1.68421	0.305	-2.31579	0.319	-0.842105
155	0.316	0.314	-1.68421	0.306	-2.52632	0.32	-1.05263
160	0.315	0.314	-1.57895	0.307	-2.31579	0.321	-0.842105
165	0.314	0.317	-1.15789	0.31	-1.89474	0.325	-0.315789
170	0.315	0.315	-1.47368	0.311	-1.89474	0.324	-0.526316
175	0.315	0.316	-1.36842	0.309	-2.10526	0.327	-0.210526
180	0.316	0.317	-1.36842	0.311	-2	0.327	-0.315789
185	0.317	0.318	-1.36842	0.311	-2.10526	0.327	-0.421053
190	0.316	0.318	-1.26316	0.312	-1.89474	0.33	1.27822e-15
195	0.318	0.319	-1.36842	0.313	-2	0.33	-0.210526
200	0.318	0.319	-1.36842	0.311	-2.21053	0.33	-0.210526
205	0.317	0.318	-1.36842	0.314	-1.78947	0.329	-0.210526
210	0.32	0.317	-1.78947	0.314	-2.10526	0.332	-0.210526
215	0.32	0.32	-1.47368	0.314	-2.10526	0.332	-0.210526
220	0.32	0.318	-1.68421	0.315	-2	0.333	-0.105263
225	0.32	0.319	-1.57895	0.316	-1.89474	0.337	0.315789
230	0.319	0.322	-1.15789	0.319	-1.47368	0.333	1.27822e-15
235	0.319	0.322	-1.15789	0.314	-2	0.331	-0.210526
240	0.317	0.323	-0.842105	0.317	-1.47368	0.335	0.421053
245	0.317	-0.652	-103.474	-0.673	-105.684	0.297	-3.57895
250	0.32	-0.652	-103.789	-0.676	-106.316	-0.675	-106.211
255	0.319	0.326	-0.736842	-0.676	-106.211	-0.675	-106.105
260	0.321	0.33	-0.526316	0.324	-1.15789	0.339	0.421053
265	0.321	0.337	0.210526	0.327	-0.842105	0.343	0.842105
270	0.319	0.344	1.15789	0.328	-0.526316	0.343	1.05263
275	0.321	0.349	1.47368	0.332	-0.315789	0.347	1.26316
280	0.32	0.357	2.42105	0.337	0.315789	0.348	1.47368
285	0.322	0.364	2.94737	0.344	0.842105	0.35	1.47368
290	0.322	0.371	3.68421	0.346	1.05263	0.355	2
295	0.32	0.38	4.84211	0.348	1.47368	0.358	2.52632
300	0.319	0.39	6	0.356	2.42105	0.362	3.05263
305	0.321	0.397	6.52632	0.36	2.63158	0.364	3.05263
310	0.321	0.406	7.47368	0.364	3.05263	0.367	3.36842
315	0.317	0.415	8.84211	0.371	4.21053	0.371	4.21053
320	0.32	0.423	9.36842	0.372	4	0.376	4.42105
325	0.32	0.429	10	0.379	4.73684	0.381	4.94737
330	0.319	0.438	11.0526	0.382	5.15789	0.382	5.15789
335	0.32	0.448	12	0.389	5.78947	0.385	5.36842
340	0.321	0.451	12.2105	0.395	6.31579	0.392	6
345	0.32	0.461	13.3684	0.398	6.73684	0.395	6.42105
350	0.321	0.468	14	0.401	6.94737	0.402	7.05263
355	0.32	0.476	14.9474	0.407	7.68421	0.405	7.47368
360	0.319	0.483	15.7895	0.411	8.21053	0.407	7.78947
365	0.319	0.492	16.7368	0.418	8.94737	0.413	8.42105
370	0.321	0.499	17.2632	0.424	9.36842	0.419	8.84211
375	0.318	0.508	18.5263	0.427	10	0.425	9.78947
380	0.322	0.513	18.6316	0.433	10.2105	0.427	9.57895
385	0.32	0.519	19.4737	0.437	10.8421	0.435	10.6316
390	0.32	0.525	20.1053	0.443	11.4737	0.44	11.1579
395	0.321	0.533	20.8421	0.443	11.3684	0.442	11.2632
400	0.32	0.538	21.4737	0.451	12.3158	0.447	11.8947
405	0.321	0.542	21.7895	0.459	13.0526	0.459	13.0526
410	0.322	0.551	22.6316	0.463	13.3684	0.457	12.7368
415	0.319	0.558	23.6842	0.466	14	0.464	13.7895
420	0.32	0.559	23.6842	0.472	14.5263	0.47	14.3158
425	0.32	0.568	24.6316	0.477	15.0526	0.476	14.9474
430	0.319	0.576	25.5789	0.481	15.5789	0.477	15.1579
435	0.317	0.58	26.2105	0.488	16.5263	0.486	16.3158
440	0.32	0.587	26.6316	0.493	16.7368	0.488	16.2105
445	0.322	0.592	26.9474	0.498	17.0526	0.494	16.6316
450	0.319	0.599	28	0.501	17.6842	0.497	17.2632
455	0.319	0.603	28.4211	0.507	18.3158	0.505	18.1053
460	0.322	0.61	28.8421	0.512	18.5263	0.509	18.2105
465	0.318	0.616	29.8947	0.521	19.8947	0.514	19.1579
470	0.32	0.62	30.1053	0.527	20.3158	0.523	19.8947
475	0.319	0.625	30.7368	0.529	20.6316	0.525	20.2105
480	0.32	0.631	31.2632	0.533	20.9474	0.533	20.9474
485	0.32	0.636	31.7895	0.539	21.5789	0.533	20.9474
490	0.32	0.642	32.4211	0.544	22.1053	0.54	21.6842
495	0.318	0.646	33.0526	0.549	22.8421	0.547	22.6316
500	0.319	0.648	33.1579	0.556	23.4737	0.552	23.0526
505	0.319	0.655	33.8947	0.558	23.6842	0.557	23.5789
510	0.319	0.66	34.4211	0.566	24.5263	0.561	24
515	0.32	0.666	34.9474	0.569	24.7368	0.571	24.9474
520	0.317	0.672	35.8947	0.577	25.8947	0.574	25.5789
525	0.318	0.68	36.6316	0.582	26.3158	0.571	25.1579
530	0.317	0.681	36.8421	0.591	27.3684	0.58	26.2105
535	0.321	0.683	36.6316	0.593	27.1579	0.588	26.6316
540	0.322	0.687	36.9474	0.601	27.8947	0.59	26.7368
545	0.32	0.696	38.1053	0.601	28.1053	0.597	27.6842
550	0.32	0.703	38.8421	0.609	28.9474	0.598	27.7895
555	0.318	0.704	39.1579	0.615	29.7895	0.608	29.0526
560	0.317	0.709	39.7895	0.622	30.6316	0.611	29.4737
565	0.319	0.718	40.5263	0.626	30.8421	0.62	30.2105
570	0.317	0.717	40.6316	0.626	31.0526	0.623	30.7368
575	0.319	0.721	40.8421	0.631	31.3684	0.623	30.5263
580	0.319	0.724	41.1579	0.634	31.6842	0.633	31.5789
585	0.319	0.732	42	0.645	32.8421	0.632	31.4737
590	0.32	0.736	42.3158	0.65	33.2632	0.644	32.6316
595	0.318	0.739	42.8421	0.653	33.7895	0.647	33.1579
600	0.316	0.746	43.7895	0.656	34.3158	0.647	33.3684
605	0.317	0.752	44.3158	0.666	35.2632	0.656	34.2105
610	0.319	0.749	43.7895	0.668	35.2632	0.661	34.5263
615	0.318	0.76	45.0526	0.677	36.3158	0.663	34.8421
620	0.318	0.762	45.2632	0.679	36.5263	0.668	35.3684
625	0.319	0.765	45.4737	0.684	36.9474	0.671	35.5789
630	0.318	0.77	46.1053	0.693	38	0.677	36.3158
635	0.319	0.775	46.5263	0.691	37.6842	0.68	36.5263
640	0.319	0.778	46.8421	0.699	38.5263	0.686	37.1579
645	0.321	0.778	46.6316	0.707	39.1579	0.686	36.9474
650	0.316	0.788	48.2105	0.71	40	0.691	38
655	0.319	0.788	47.8947	0.711	39.7895	0.698	38.4211
660	0.32	0.79	48	0.714	40	0.705	39.0526
665	0.321	0.798	48.7368	0.725	41.0526	0.707	39.1579
670	0.321	0.798	48.7368	0.724	40.9474	0.71	39.4737
675	0.321	0.802	49.1579	0.729	41.4737	0.711	39.5789
680	0.318	0.804	49.6842	0.738	42.7368	0.716	40.4211
685	0.318	0.809	50.2105	0.741	43.0526	0.719	40.7368
690	0.318	0.811	50.4211	0.738	42.7368	0.724	41.2632
695	0.319	0.818	51.0526	0.746	43.4737	0.732	42
700	0.319	0.818	51.0526	0.75	43.8947	0.73	41.7895
705	0.32	0.824	51.5789	0.75	43.7895	0.738	42.5263
710	0.316	0.825	52.1053	0.754	44.6316	0.739	43.0526
715	0.318	0.825	51.8947	0.761	45.1579	0.745	43.4737
720	0.317	0.838	53.3684	0.765	45.6842	0.745	43.5789
725	0.319	0.835	52.8421	0.76	44.9474	0.751	44
730	0.317	0.842	53.7895	0.771	46.3158		-34.8421
735	0.316	0.843	54	0.777	47.0526		-34.7368
740	0.317	0.841	53.6842	0.779	47.1579		-34.8421
745	0.318	0.848	54.3158	0.783	47.4737		-34.9474
750	0.316	0.855	55.2632	0.788	48.2105		-34.7368
755	0.317	0.852	54.8421	0.789	48.2105		-34.8421
760	0.318	0.856	55.1579	0.786	47.7895		-34.9474
765	0.316	0.858	55.5789	0.796	49.0526		-34.7368
770	0.319	0.862	55.6842	0.798	48.9474		-35.0526
775	0.319	0.865	56	0.802	49.3684		-35.0526
780	0.319	0.871	56.6316	0.803	49.4737		-35.0526
785	0.317	0.869	56.6316	0.811	50.5263		-34.8421
790	0.316	0.873	57.1579	0.832	52.8421		-34.7368
795	0.321	0.874	56.7368	0.811	50.1053		-35.2632
800	0.318	0.881	57.7895	0.822	51.5789		-34.9474
805	0.317	0.879	57.6842	0.823	51.7895		-34.8421
810	0.317	0.887	58.5263	0.825	52		-34.8421
815	0.317	0.89	58.8421	0.821	51.5789		-34.8421
820	0.316	0.884	58.3158	0.829	52.5263		-34.7368
825	0.318	0.896	59.3684	0.828	52.2105		-34.9474
830	0.316	0.889	58.8421	0.836	53.2632		-34.7368
835	0.314	0.897	59.8947	0.832	53.0526		-34.5263
840	0.318	0.899	59.6842	0.838	53.2632		-34.9474
845	0.316	0.901	60.1053		-34.7368		-34.7368
850	0.316	0.901	60.1053		-34.7368		-34.7368
855	0.319	0.91	60.7368		-35.0526		-35.0526
860	0.321	0.902	59.6842		-35.2632		-35.2632
865	0.319	0.912	60.9474		-35.0526		-35.0526
870	0.317	0.908	60.7368		-34.8421		-34.8421
875	0.317	0.911	61.0526		-34.8421		-34.8421
880	0.317	0.923	62.3158		-34.8421		-34.8421
885	0.317	0.917	61.6842		-34.8421		-34.8421
890	0.317	0.918	61.7895		-34.8421		-34.8421
895	0.318	0.919	61.7895		-34.9474		-34.9474
900	0.316	0.922	62.3158		-34.7368		-34.7368
905	0.318	0.921	62		-34.9474		-34.9474
910	0.32	0.927	62.4211		-35.1579		-35.1579
915	0.319	0.925	62.3158		-35.0526		-35.0526
920	0.317	0.93	63.0526		-34.8421		-34.8421
925	0.317	0.922	62.2105		-34.8421		-34.8421
930	0.315	0.925	62.7368		-34.6316		-34.6316
935	0.317	0.934	63.4737		-34.8421		-34.8421
940	0.317	0.94	64.1053		-34.8421		-34.8421
945	0.318	0.941	64.1053		-34.9474		-34.9474
950	0.316	0.94	64.2105		-34.7368		-34.7368
955	0.316	0.927	62.8421		-34.7368		-34.7368
960	0.318	0.94	64		-34.9474		-34.9474
965	0.318	0.941	64.1053		-34.9474		-34.9474
970	0.318	0.945	64.5263		-34.9474		-34.9474
975	0.317	0.943	64.4211		-34.8421		-34.8421
980	0.317	0.944	64.5263		-34.8421		-34.8421
985	0.317	0.955	65.6842		-34.8421		-34.8421
990	0.319	0.951	65.0526		-35.0526		-35.0526
995	0.317	0.941	64.2105		-34.8421		-34.8421
1000	0.317	0.951	65.2632		-34.8421		-34.8421
1005	0.319	0.951	65.0526		-35.0526		-35.0526
1010	0.317	0.948	64.9474		-34.8421		-34.8421
1015	0.316	0.955	65.7895		-34.7368		-34.7368
1020	0.316	0.957	66		-34.7368		-34.7368
1025	0.319	0.953	65.2632		-35.0526		-35.0526
1030	0.318	0.962	66.3158		-34.9474		-34.9474
1035	0.317	0.968	67.0526		-34.8421		-34.8421
1040	0.317	0.964	66.6316		-34.8421		-34.8421
1045	0.317	0.959	66.1053		-34.8421		-34.8421
1050	0.318	0.957	65.7895		-34.9474		-34.9474
1055	0.316	0.971	67.4737		-34.7368		-34.7368
1060	0.32	0.967	66.6316		-35.1579		-35.1579
1065	0.316	0.966	66.9474		-34.7368		-34.7368
1070	0.318	0.963	66.4211		-34.9474		-34.9474
1075	0.319	0.967	66.7368		-35.0526		-35.0526
1080	0.319	0.966	66.6316		-35.0526		-35.0526
1085	0.319	0.973	67.3684		-35.0526		-35.0526
1090	0.32	0.978	67.7895		-35.1579		-35.1579
1095	0.317	0.969	67.1579		-34.8421		-34.8421
1100	0.317	0.973	67.5789		-34.8421		-34.8421
1105	0.317	0.972	67.4737		-34.8421		-34.8421
1110	0.317	0.968	67.0526		-34.8421		-34.8421
1115	0.319	0.968	66.8421		-35.0526		-35.0526
1120	0.322	0.973	67.0526		-35.3684		-35.3684
1125	0.32	0.98	68		-35.1579		-35.1579
1130	0.317	0.972	67.4737		-34.8421		-34.8421
1135	0.318	0.984	68.6316		-34.9474		-34.9474
1140	0.319	0.976	67.6842		-35.0526		-35.0526
1145	0.321	0.976	67.4737		-35.2632		-35.2632
1150	0.317	0.972	67.4737		-34.8421		-34.8421
1155	0.319	0.982	68.3158		-35.0526		-35.0526
1160	0.316	0.974	67.7895		-34.7368		-34.7368
1165	0.316	0.983	68.7368		-34.7368		-34.7368
1170	0.321	0.974	67.2632		-35.2632		-35.2632
1175	0.317	0.975	67.7895		-34.8421		-34.8421
1180	0.318	0.981	68.3158		-34.9474		-34.9474
1185	0.318	0.98	68.2105		-34.9474		-34.9474
1190	0.319	0.991	69.2632		-35.0526		-35.0526
1195	0.321	0.989	68.8421		-35.2632		-35.2632
1200	0.318	0.989	69.1579		-34.9474		-34.9474
1205	0.319	0.984	68.5263		-35.0526		-35.0526
1210	0.317	0.986	68.9474		-34.8421		-34.8421
1215	0.317	0.98	68.3158		-34.8421		-34.8421
1220	0.322	0.987	68.5263		-35.3684		-35.3684
1225	0.316	0.985	68.9474		-34.7368		-34.7368
1230	0.319	0.992	69.3684		-35.0526		-35.0526
1235	0.318	0.983	68.5263		-34.9474		-34.9474
1240	0.319	0.991	69.2632		-35.0526		-35.0526
1245	0.318	0.989	69.1579		-34.9474		-34.9474
1250	0.319	0.99	69.1579		-35.0526		-35.0526
1255	0.321	0.991	69.0526		-35.2632		-35.2632
1260	0.318	0.988	69.0526		-34.9474		-34.9474
1265	0.319	0.993	69.4737		-35.0526		-35.0526
1270	0.32	0.982	68.2105		-35.1579		-35.1579
1275	0.319	0.992	69.3684		-35.0526		-35.0526
1280	0.319	0.991	69.2632		-35.0526		-35.0526
1285	0.32	0.987	68.7368		-35.1579		-35.1579
1290	0.319	0.993	69.4737		-35.0526		-35.0526
1295	0.319	0.991	69.2632		-35.0526		-35.0526
1300	0.319	0.996	69.7895		-35.0526		-35.0526
1305	0.319	1.002	70.4211		-35.0526		-35.0526
1310	0.319	1	70.2105		-35.0526		-35.0526
1315	0.321	0.998	69.7895		-35.2632		-35.2632
1320	0.321	1.005	70.5263		-35.2632		-35.2632
1325	0.318	0.996	69.8947		-34.9474		-34.9474
1330	0.323	0.995	69.2632		-35.4737		-35.4737
1335	0.321	0.995	69.4737		-35.2632		-35.2632
1340	0.32	0.999	70		-35.1579		-35.1579
1345	0.321	1.005	70.5263		-35.2632		-35.2632
1350	0.319	0.999	70.1053		-35.0526		-35.0526
1355	0.319	1.004	70.6316		-35.0526		-35.0526
1360	0.317		-34.8421		-34.8421		-34.8421
1365	0.32		-35.1579		-35.1579		-35.1579
1370	0.32		-35.1579		-35.1579		-35.1579
1375	0.318		-34.9474		-34.9474		-34.9474
1380	0.319		-35.0526		-35.0526		-35.0526
1385	0.322		-35.3684		-35.3684		-35.3684
1390	0.322		-35.3684		-35.3684		-35.3684
1395	0.321		-35.2632		-35.2632		-35.2632
1400	0.323		-35.4737		-35.4737		-35.4737
1405	0.32		-35.1579		-35.1579		-35.1579
1410	0.322		-35.3684		-35.3684		-35.3684
1415	0.319		-35.0526		-35.0526		-35.0526
1420	0.323		-35.4737		-35.4737		-35.4737
1425	0.323		-35.4737		-35.4737		-35.4737
1430	0.322		-35.3684		-35.3684		-35.3684
1435	0.321		-35.2632		-35.2632		-35.2632
1440	0.321		-35.2632		-35.2632		-35.2632
1445	0.322		-35.3684		-35.3684		-35.3684
1450	0.323		-35.4737		-35.4737		-35.4737
1455	0.32		-35.1579		-35.1579		-35.1579
1460	0.319		-35.0526		-35.0526		-35.0526
1465	0.32		-35.1579		-35.1579		-35.1579
1470	0.32		-35.1579		-35.1579		-35.1579
1475	0.322		-35.3684		-35.3684		-35.3684
1480	0.319		-35.0526		-35.0526		-35.0526
1485	0.32		-35.1579		-35.1579		-35.1579
1490	0.32		-35.1579		-35.1579		-35.1579
1495	0.319		-35.0526		-35.0526		-35.0526
1500	0.321		-35.2632		-35.2632		-35.2632
1505	0.32		-35.1579		-35.1579		-35.1579
1510	0.319		-35.0526		-35.0526		-35.0526
1515	0.32		-35.1579		-35.1579		-35.1579
1520	0.319		-35.0526		-35.0526		-35.0526
1525	0.322		-35.3684		-35.3684		-35.3684
1530	0.323		-35.4737		-35.4737		-35.4737
1535	0.321		-35.2632		-35.2632		-35.2632
1540	0.324		-35.5789		-35.5789		-35.5789
1545	0.32		-35.1579		-35.1579		-35.1579
1550	0.321		-35.2632		-35.2632		-35.2632
1555	0.317		-34.8421		-34.8421		-34.8421
1560	0.32		-35.1579		-35.1579		-35.1579
1565	0.321		-35.2632		-35.2632		-35.2632
1570	0.32		-35.1579		-35.1579		-35.1579
1575	0.322		-35.3684		-35.3684		-35.3684
1580	0.321		-35.2632		-35.2632		-35.2632
1585	0.321		-35.2632		-35.2632		-35.2632
1590	0.321		-35.2632		-35.2632		-35.2632
1595	0.323		-35.4737		-35.4737		-35.4737
1600	0.319		-35.0526		-35.0526		-35.0526
1605	0.319		-35.0526		-35.0526		-35.0526
1610	0.322		-35.3684		-35.3684		-35.3684
1615	0.322		-35.3684		-35.3684		-35.3684
1620	0.32		-35.1579		-35.1579		-35.1579
1625	0.321		-35.2632		-35.2632		-35.2632
1630	0.321		-35.2632		-35.2632		-35.2632
1635	0.323		-35.4737		-35.4737		-35.4737
1640	0.323		-35.4737		-35.4737		-35.4737
1645	0.32		-35.1579		-35.1579		-35.1579
1650	0.32		-35.1579		-35.1579		-35.1579
1655	0.318		-34.9474		-34.9474		-34.9474
1660	0.322		-35.3684		-35.3684		-35.3684
1665	0.319		-35.0526		-35.0526		-35.0526
1670	0.321		-35.2632		-35.2632		-35.2632
1675	0.319		-35.0526		-35.0526		-35.0526
1680	0.322		-35.3684		-35.3684		-35.3684
1685	0.322		-35.3684		-35.3684		-35.3684
1690	0.323		-35.4737		-35.4737		-35.4737
1695	0.319		-35.0526		-35.0526		-35.0526
1700	0.324		-35.5789		-35.5789		-35.5789
1705	0.321		-35.2632		-35.2632		-35.2632
1710	0.321		-35.2632		-35.2632		-35.2632
1715	0.322		-35.3684		-35.3684		-35.3684
1720	0.321		-35.2632		-35.2632		-35.2632
1725	0.321		-35.2632		-35.2632		-35.2632
1730	0.322		-35.3684		-35.3684		-35.3684
1735	0.321		-35.2632		-35.2632		-35.2632
1740	0.319		-35.0526		-35.0526		-35.0526
1745	0.322		-35.3684		-35.3684		-35.3684
1750	0.317		-34.8421		-34.8421		-34.8421
1755	0.321		-35.2632		-35.2632		-35.2632
1760	0.321		-35.2632		-35.2632		-35.2632
1765	0.322		-35.3684		-35.3684		-35.3684
1770	0.323		-35.4737		-35.4737		-35.4737
1775	0.319		-35.0526		-35.0526		-35.0526
1780	0.319		-35.0526		-35.0526		-35.0526
1785	0.32		-35.1579		-35.1579		-35.1579
1790	0.323		-35.4737		-35.4737		-35.4737
1795	0.32		-35.1579		-35.1579		-35.1579
1800	0.321		-35.2632		-35.2632		-35.2632

## Sheet: result
KLP-12(M) + GDP-tubulin (Tu)
GDP-Tu (nM)	100	300	1000	3000	10000
ATPase rate ( /s), 1st	0.0076	0.0076	0.0205	0.0497	0.1703
ATPase rate ( /s), 2nd	0.0085	0.0097	0.0151	0.0403	0.1003
ATPase rate ( /s), 3rd	0.0038	0.0086	0.0147	0.0347	0.0918
mean	0.00663333	0.00863333	0.0167667	0.0415667	0.1208
SD	0.00249466	0.0010504	0.00323934	0.0075798	0.0430784
