# Supplementary material for: Structural model of microtubule dynamics inhibition by kinesin-4 from the crystal structure of KLP-12 –tubulin complex
Source: eLife. 2022 Sep 6;11:e77877. doi: 10.7554/eLife.77877 (PMC9451533; doi:10.7554/eLife.77877)
Supplement: Figure 3—source data 4. [file elife-77877-fig3-data4.xlsx]

## Sheet: Pi standard
Pi Conc. (μM)	OD360
0	0
25	0.2537
50	0.5112
100	0.9484

## Sheet: Basal
Time (sec)	BG_OD360	1st_OD360	1st_ΔPi con. (μM)	2nd_OD360	2nd_ΔPi con. (μM)	3rd_OD360	3rd_ΔPi con. (μM)
	0.117	0.121		0.105		0.123
5	0.148	0.149	-1.36842	0.139	-2.42105	0.151	-1.15789
10	0.174	0.176	-1.26316	0.165	-2.42105	0.174	-1.47368
15	0.193	0.199	-0.842105	0.187	-2.10526	0.198	-0.947368
20	0.213	0.219	-0.842105	0.206	-2.21053	0.219	-0.842105
25	0.23	0.235	-0.947368	0.223	-2.21053	0.234	-1.05263
30	0.245	0.251	-0.842105	0.237	-2.31579	0.248	-1.15789
35	0.255	0.264	-0.526316	0.252	-1.78947	0.259	-1.05263
40	0.266	0.274	-0.631579	0.262	-1.89474	0.268	-1.26316
45	0.276	0.28	-1.05263	0.273	-1.78947	0.275	-1.57895
50	0.285	0.292	-0.736842	0.278	-2.21053	0.285	-1.47368
55	0.292	0.295	-1.15789	0.288	-1.89474	0.29	-1.68421
60	0.298	0.299	-1.36842	0.293	-2	0.296	-1.68421
65	0.299	0.305	-0.842105	0.292	-2.21053	0.297	-1.68421
70	0.304	0.31	-0.842105	0.298	-2.10526	0.302	-1.68421
75	0.309	0.312	-1.15789	0.301	-2.31579	0.306	-1.78947
80	0.314	0.316	-1.26316	0.301	-2.84211	0.309	-2
85	0.311	0.317	-0.842105	0.305	-2.10526	0.309	-1.68421
90	0.315	0.318	-1.15789	0.308	-2.21053	0.309	-2.10526
95	0.316	0.319	-1.15789	0.305	-2.63158	0.31	-2.10526
100	0.314	0.323	-0.526316	0.308	-2.10526	0.31	-1.89474
105	0.314	0.322	-0.631579	0.308	-2.10526	0.312	-1.68421
110	0.315	0.318	-1.15789	0.312	-1.78947	0.313	-1.68421
115	0.316	0.319	-1.15789	0.312	-1.89474	0.312	-1.89474
120	0.319	0.32	-1.36842	0.31	-2.42105	0.314	-2
125	0.319	0.322	-1.15789	0.307	-2.73684	0.313	-2.10526
130	0.317	0.323	-0.842105	0.307	-2.52632	0.31	-2.21053
135	0.316	0.321	-0.947368	0.31	-2.10526	0.31	-2.10526
140	0.319	0.32	-1.36842	0.313	-2.10526	0.309	-2.52632
145	0.315	0.32	-0.947368	0.309	-2.10526	0.311	-1.89474
150	0.316	0.321	-0.947368	0.308	-2.31579	0.312	-1.89474
155	0.316	0.319	-1.15789	0.31	-2.10526	0.309	-2.21053
160	0.317	0.321	-1.05263	0.308	-2.42105	0.311	-2.10526
165	0.319	0.318	-1.57895	0.307	-2.73684	0.309	-2.52632
170	0.32	0.32	-1.47368	0.308	-2.73684	0.309	-2.63158
175	0.316	0.32	-1.05263	0.307	-2.42105	0.309	-2.21053
180	0.319	0.316	-1.78947	0.308	-2.63158	0.308	-2.63158
185	0.317	0.315	-1.68421	0.307	-2.52632	0.308	-2.42105
190	0.317	0.318	-1.36842	0.311	-2.10526	0.308	-2.42105
195	0.315	0.321	-0.842105	0.306	-2.42105	0.308	-2.21053
200	0.312	0.317	-0.947368	0.308	-1.89474	0.308	-1.89474
205	0.315	0.317	-1.26316	0.306	-2.42105	0.307	-2.31579
210	0.314	0.316	-1.26316	0.304	-2.52632	0.307	-2.21053
215	0.319	0.319	-1.47368	0.305	-2.94737	0.309	-2.52632
220	0.311	0.315	-1.05263	0.306	-2	0.311	-1.47368
225	0.313	0.317	-1.05263	0.308	-2	0.31	-1.78947
230	0.312	0.321	-0.526316	0.306	-2.10526	0.309	-1.78947
235	0.312	0.316	-1.05263	0.308	-1.89474	0.308	-1.89474
240	0.313	0.319	-0.842105	0.306	-2.21053	0.307	-2.10526
245	0.317	0.317	-1.47368	0.303	-2.94737	0.308	-2.42105
250	0.314	-0.726	-110.947	-0.022	-36.8421	-0.725	-110.842
255	0.314	0.237	-9.57895	-0.728	-111.158	-0.724	-110.737
260	0.314	0.314	-1.47368	-0.726	-110.947	0.303	-2.63158
265	0.316	0.315	-1.57895	0.298	-3.36842	0.308	-2.31579
270	0.312	0.316	-1.05263	0.301	-2.63158	0.307	-2
275	0.315	0.317	-1.26316	0.3	-3.05263	0.307	-2.31579
280	0.314	0.317	-1.15789	0.303	-2.63158	0.308	-2.10526
285	0.311	0.321	-0.421053	0.304	-2.21053	0.308	-1.78947
290	0.312	0.319	-0.736842	0.301	-2.63158	0.309	-1.78947
295	0.312	0.316	-1.05263	0.303	-2.42105	0.311	-1.57895
300	0.315	0.319	-1.05263	0.305	-2.52632	0.308	-2.21053
305	0.314	0.318	-1.05263	0.305	-2.42105	0.31	-1.89474
310	0.313	0.317	-1.05263	0.304	-2.42105	0.308	-2
315	0.313	0.32	-0.736842	0.307	-2.10526	0.311	-1.68421
320	0.313	0.319	-0.842105	0.305	-2.31579	0.312	-1.57895
325	0.315	0.318	-1.15789	0.304	-2.63158	0.311	-1.89474
330	0.315	0.319	-1.05263	0.303	-2.73684	0.311	-1.89474
335	0.312	0.319	-0.736842	0.307	-2	0.311	-1.57895
340	0.314	0.323	-0.526316	0.306	-2.31579	0.314	-1.47368
345	0.315	0.32	-0.947368	0.306	-2.42105	0.312	-1.78947
350	0.314	0.32	-0.842105	0.306	-2.31579	0.311	-1.78947
355	0.315	0.32	-0.947368	0.307	-2.31579	0.31	-2
360	0.313	0.319	-0.842105	0.308	-2	0.31	-1.78947
365	0.311	0.318	-0.736842	0.309	-1.68421	0.312	-1.36842
370	0.315	0.32	-0.947368	0.311	-1.89474	0.314	-1.57895
375	0.313	0.318	-0.947368	0.31	-1.78947	0.309	-1.89474
380	0.312	0.323	-0.315789	0.31	-1.68421	0.315	-1.15789
385	0.314	0.324	-0.421053	0.309	-2	0.314	-1.47368
390	0.313	0.323	-0.421053	0.309	-1.89474	0.314	-1.36842
395	0.311	0.321	-0.421053	0.311	-1.47368	0.312	-1.36842
400	0.315	0.32	-0.947368	0.312	-1.78947	0.313	-1.68421
405	0.314	0.321	-0.736842	0.312	-1.68421	0.312	-1.68421
410	0.315	0.324	-0.526316	0.309	-2.10526	0.309	-2.10526
415	0.316	0.323	-0.736842	0.308	-2.31579	0.314	-1.68421
420	0.314	0.324	-0.421053	0.311	-1.78947	0.316	-1.26316
425	0.316	0.322	-0.842105	0.31	-2.10526	0.314	-1.68421
430	0.317	0.324	-0.736842	0.311	-2.10526	0.314	-1.78947
435	0.315	0.323	-0.631579	0.311	-1.89474	0.315	-1.47368
440	0.315	0.322	-0.736842	0.313	-1.68421	0.313	-1.68421
445	0.315	0.325	-0.421053	0.313	-1.68421	0.315	-1.47368
450	0.314	0.325	-0.315789	0.313	-1.57895	0.315	-1.36842
455	0.315	0.328	-0.105263	0.311	-1.89474	0.316	-1.36842
460	0.313	0.326	-0.105263	0.315	-1.26316	0.314	-1.36842
465	0.315	0.326	-0.315789	0.312	-1.78947	0.314	-1.57895
470	0.314	0.327	-0.105263	0.315	-1.36842	0.316	-1.26316
475	0.315	0.326	-0.315789	0.314	-1.57895	0.317	-1.26316
480	0.316	0.329	-0.105263	0.314	-1.68421	0.316	-1.47368
485	0.313	0.33	0.315789	0.314	-1.36842	0.316	-1.15789
490	0.316	0.327	-0.315789	0.316	-1.47368	0.314	-1.68421
495	0.316	0.329	-0.105263	0.314	-1.68421	0.315	-1.57895
500	0.315	0.329	1.27822e-15	0.316	-1.36842	0.315	-1.47368
505	0.319	0.329	-0.421053	0.316	-1.78947	0.318	-1.57895
510	0.314	0.329	0.105263	0.314	-1.47368	0.318	-1.05263
515	0.317	0.33	-0.105263	0.316	-1.57895	0.318	-1.36842
520	0.313	0.333	0.631579	0.316	-1.15789	0.319	-0.842105
525	0.316	0.331	0.105263	0.317	-1.36842	0.318	-1.26316
530	0.315	0.333	0.421053	0.319	-1.05263	0.317	-1.26316
535	0.315	0.334	0.526316	0.317	-1.26316	0.319	-1.05263
540	0.316	0.33	1.27822e-15	0.319	-1.15789	0.319	-1.15789
545	0.317	0.334	0.315789	0.319	-1.26316	0.321	-1.05263
550	0.314	0.336	0.842105	0.319	-0.947368	0.318	-1.05263
555	0.317	0.332	0.105263	0.319	-1.26316	0.322	-0.947368
560	0.317	0.334	0.315789	0.319	-1.26316	0.323	-0.842105
565	0.314	0.336	0.842105	0.322	-0.631579	0.32	-0.842105
570	0.315	0.338	0.947368	0.323	-0.631579	0.322	-0.736842
575	0.316	0.336	0.631579	0.322	-0.842105	0.321	-0.947368
580	0.315	0.335	0.631579	0.323	-0.631579	0.319	-1.05263
585	0.315	0.338	0.947368	0.325	-0.421053	0.32	-0.947368
590	0.315	0.337	0.842105	0.323	-0.631579	0.323	-0.631579
595	0.315	0.338	0.947368	0.324	-0.526316	0.324	-0.526316
600	0.318	0.342	1.05263	0.325	-0.736842	0.321	-1.15789
605	0.315	0.341	1.26316	0.329	1.27822e-15	0.323	-0.631579
610	0.318	0.342	1.05263	0.327	-0.526316	0.323	-0.947368
615	0.315	0.343	1.47368	0.326	-0.315789	0.324	-0.526316
620	0.316	0.342	1.26316	0.328	-0.210526	0.325	-0.526316
625	0.316	0.346	1.68421	0.329	-0.105263	0.326	-0.421053
630	0.313	0.356	3.05263	0.33	0.315789	0.326	-0.105263
635	0.315	0.345	1.68421	0.331	0.210526	0.325	-0.421053
640	0.318	0.345	1.36842	0.332	1.27822e-15	0.325	-0.736842
645	0.315	0.347	1.89474	0.332	0.315789	0.327	-0.210526
650	0.315	0.349	2.10526	0.332	0.315789	0.327	-0.210526
655	0.315	0.35	2.21053	0.33	0.105263	0.327	-0.210526
660	0.316	0.35	2.10526	0.336	0.631579	0.328	-0.210526
665	0.316	0.349	2	0.336	0.631579	0.328	-0.210526
670	0.316	0.351	2.21053	0.335	0.526316	0.327	-0.315789
675	0.315	0.352	2.42105	0.335	0.631579	0.327	-0.210526
680	0.316	0.352	2.31579	0.338	0.842105	0.33	1.27822e-15
685	0.318	0.351	2	0.336	0.421053	0.328	-0.421053
690	0.317	0.352	2.21053	0.336	0.526316	0.329	-0.210526
695	0.316	0.353	2.42105	0.337	0.736842	0.329	-0.105263
700	0.318	0.352	2.10526	0.337	0.526316	0.33	-0.210526
705	0.319	0.353	2.10526	0.342	0.947368	0.333	1.27822e-15
710	0.318	0.357	2.63158	0.343	1.15789	0.332	1.27822e-15
715	0.32	0.357	2.42105	0.338	0.421053	0.333	-0.105263
720	0.315	0.356	2.84211	0.339	1.05263	0.332	0.315789
725	0.316	0.356	2.73684	0.339	0.947368	0.335	0.526316
730	0.319	0.36	2.84211	0.341	0.842105	0.334	0.105263
735	0.316	0.358	2.94737	0.339	0.947368	0.333	0.315789
740	0.319	0.361	2.94737	0.342	0.947368	0.336	0.315789
745	0.317	0.357	2.73684	0.342	1.15789	0.338	0.736842
750	0.318	0.359	2.84211	0.343	1.15789	0.333	0.105263
755	0.317	0.359	2.94737	0.341	1.05263	0.339	0.842105
760	0.318	0.358	2.73684	0.343	1.15789	0.336	0.421053
765	0.317	0.359	2.94737	0.345	1.47368	0.336	0.526316
770	0.32	0.36	2.73684	0.341	0.736842	0.341	0.736842
775	0.319	0.364	3.26316	0.346	1.36842	0.336	0.315789
780	0.32	0.36	2.73684	0.343	0.947368	0.336	0.210526
785	0.319	0.36	2.84211	0.344	1.15789	0.34	0.736842
790	0.315	0.362	3.47368	0.347	1.89474	0.339	1.05263
795	0.317	0.361	3.15789	0.346	1.57895	0.339	0.842105
800	0.319	0.365	3.36842	0.345	1.26316	0.338	0.526316
805	0.318	0.362	3.15789	0.348	1.68421	0.339	0.736842
810	0.318	0.363	3.26316	0.348	1.68421	0.343	1.15789
815	0.323	0.362	2.63158	0.348	1.15789	0.337	1.27822e-15
820	0.317	0.364	3.47368	0.348	1.78947	0.345	1.47368
825	0.319	0.362	3.05263	0.351	1.89474	0.343	1.05263
830	0.32	0.364	3.15789	0.348	1.47368	0.343	0.947368
835	0.319	0.365	3.36842	0.347	1.47368	0.343	1.05263
840	0.319	0.366	3.47368	0.349	1.68421	0.344	1.15789
845	0.316	0.366	3.78947	0.35	2.10526	0.343	1.36842
850	0.317	0.364	3.47368	0.349	1.89474	0.343	1.26316
855	0.32	0.365	3.26316	0.351	1.78947	0.345	1.15789
860	0.318	0.365	3.47368	0.352	2.10526	0.346	1.47368
865	0.318	0.362	3.15789	0.35	1.89474	0.345	1.36842
870	0.32	0.367	3.47368	0.352	1.89474	0.347	1.36842
875	0.319	0.366	3.47368	0.35	1.78947	0.347	1.47368
880	0.323	0.366	3.05263	0.351	1.47368	0.35	1.36842
885	0.32	0.365	3.26316	0.352	1.89474	0.347	1.36842
890	0.319	0.365	3.36842	0.352	2	0.347	1.47368
895	0.319	0.367	3.57895	0.35	1.78947	0.348	1.57895
900	0.322	0.366	3.15789	0.353	1.78947	0.347	1.15789
905	0.323	0.368	3.26316	0.35	1.36842	0.346	0.947368
910	0.319	0.365	3.36842	0.35	1.78947	0.348	1.57895
915	0.318	0.368	3.78947	0.353	2.21053	0.349	1.78947
920	0.321	0.367	3.36842	0.35	1.57895	0.349	1.47368
925	0.319	0.369	3.78947	0.353	2.10526	0.348	1.57895
930	0.32	0.367	3.47368	0.352	1.89474	0.346	1.26316
935	0.319	0.368	3.68421	0.356	2.42105	0.349	1.68421
940	0.318	0.369	3.89474	0.351	2	0.348	1.68421
945	0.32	0.369	3.68421	0.353	2	0.347	1.36842
950	0.32	0.37	3.78947	0.353	2	0.35	1.68421
955	0.319	0.37	3.89474	0.354	2.21053	0.352	2
960	0.321	0.369	3.57895	0.356	2.21053	0.348	1.36842
965	0.324	0.372	3.57895	0.357	2	0.351	1.36842
970	0.321	0.369	3.57895	0.355	2.10526	0.354	2
975	0.32	0.37	3.78947	0.353	2	0.357	2.42105
980	0.322	0.371	3.68421	0.354	1.89474	0.352	1.68421
985	0.32	0.373	4.10526	0.354	2.10526	0.351	1.78947
990	0.319	0.373	4.21053	0.352	2	0.352	2
995	0.323	0.372	3.68421	0.355	1.89474	0.355	1.89474
1000	0.321	0.373	4	0.357	2.31579	0.348	1.36842
1005	0.321	0.374	4.10526	0.356	2.21053	0.35	1.57895
1010	0.322	0.371	3.68421	0.356	2.10526	0.35	1.47368
1015	0.322	0.375	4.10526	0.357	2.21053	0.353	1.78947
1020	0.319	0.371	4	0.357	2.52632	0.354	2.21053
1025	0.321	0.373	4	0.359	2.52632	0.351	1.68421
1030	0.319	0.371	4	0.358	2.63158	0.351	1.89474
1035	0.323	0.374	3.89474	0.357	2.10526	0.351	1.47368
1040	0.317	0.376	4.73684	0.356	2.63158	0.352	2.21053
1045	0.323	0.373	3.78947	0.359	2.31579	0.353	1.68421
1050	0.323	0.383	4.84211	0.359	2.31579	0.351	1.47368
1055	0.323	0.376	4.10526	0.36	2.42105	0.353	1.68421
1060	0.321	0.377	4.42105	0.36	2.63158	0.354	2
1065	0.322	0.375	4.10526	0.361	2.63158	0.35	1.47368
1070	0.324	0.376	4	0.358	2.10526	0.351	1.36842
1075	0.323	0.375	4	0.359	2.31579	0.355	1.89474
1080	0.323	0.377	4.21053	0.359	2.31579	0.353	1.68421
1085	0.322	0.376	4.21053	0.359	2.42105	0.35	1.47368
1090	0.323	0.374	3.89474	0.358	2.21053	0.354	1.78947
1095	0.321	0.379	4.63158	0.362	2.84211	0.355	2.10526
1100	0.321	0.379	4.63158	0.36	2.63158	0.367	3.36842
1105	0.322	0.375	4.10526	0.358	2.31579	0.353	1.78947
1110	0.319	0.376	4.52632	0.356	2.42105	0.356	2.42105
1115	0.325	0.379	4.21053	0.361	2.31579	0.35	1.15789
1120	0.322	0.379	4.52632	0.361	2.63158	0.358	2.31579
1125	0.323	0.377	4.21053	0.361	2.52632	0.359	2.31579
1130	0.324	0.379	4.31579	0.361	2.42105	0.354	1.68421
1135	0.324	0.378	4.21053	0.362	2.52632	0.356	1.89474
1140	0.323	0.382	4.73684	0.363	2.73684	0.353	1.68421
1145	0.323	0.378	4.31579	0.361	2.52632	0.356	2
1150	0.324	0.379	4.31579	0.361	2.42105	0.352	1.47368
1155	0.322	0.381	4.73684	0.363	2.84211	0.354	1.89474
1160	0.321	0.378	4.52632	0.361	2.73684	0.352	1.78947
1165	0.324	0.379	4.31579	0.361	2.42105	0.354	1.68421
1170	0.325	0.377	4	0.362	2.42105	0.352	1.36842
1175	0.324	0.38	4.42105	0.361	2.42105	0.353	1.57895
1180	0.325	0.38	4.31579	0.361	2.31579	0.353	1.47368
1185	0.324	0.381	4.52632	0.365	2.84211	0.355	1.78947
1190	0.324	0.381	4.52632	0.363	2.63158	0.353	1.57895
1195	0.326	0.38	4.21053	0.363	2.42105	0.357	1.78947
1200	0.324	0.378	4.21053	0.365	2.84211	0.355	1.78947
1205	0.323	0.381	4.63158	0.363	2.73684	0.354	1.78947
1210	0.323	0.384	4.94737	0.364	2.84211	0.356	2
1215	0.323	0.383	4.84211	0.364	2.84211	0.355	1.89474
1220	0.324	0.381	4.52632	0.362	2.52632	0.356	1.89474
1225	0.324	0.381	4.52632	0.365	2.84211	0.355	1.78947
1230	0.324	0.383	4.73684	0.363	2.63158	0.354	1.68421
1235	0.324	0.383	4.73684	0.366	2.94737	0.355	1.78947
1240	0.324	0.383	4.73684	0.365	2.84211	0.355	1.78947
1245	0.324	0.38	4.42105	0.363	2.63158	0.354	1.68421
1250	0.324	0.382	4.63158	0.364	2.73684	0.354	1.68421
1255	0.324	0.384	4.84211	0.366	2.94737	0.356	1.89474
1260	0.326	0.385	4.73684	0.368	2.94737	0.357	1.78947
1265	0.326	0.381	4.31579	0.367	2.84211	0.355	1.57895
1270	0.323	0.384	4.94737	0.363	2.73684	0.356	2
1275	0.326	0.381	4.31579	0.365	2.63158	0.358	1.89474
1280	0.326	0.387	4.94737	0.368	2.94737	0.354	1.47368
1285	0.325	0.386	4.94737	0.367	2.94737	0.359	2.10526
1290	0.326	0.383	4.52632	0.366	2.73684	0.356	1.68421
1295	0.325	0.385	4.84211	0.366	2.84211	0.359	2.10526
1300	0.327	0.387	4.84211	0.366	2.63158	0.354	1.36842
1305	0.327	0.385	4.63158	0.369	2.94737	0.356	1.57895
1310	0.326	0.382	4.42105	0.37	3.15789	0.356	1.68421
1315	0.326	0.386	4.84211	0.366	2.73684	0.358	1.89474
1320	0.326	0.387	4.94737	0.369	3.05263	0.357	1.78947
1325	0.329	0.387	4.63158	0.367	2.52632	0.357	1.47368
1330	0.325	0.387	5.05263	0.37	3.26316	0.355	1.68421
1335	0.324	0.385	4.94737	0.369	3.26316	0.358	2.10526
1340	0.323	0.385	5.05263	0.372	3.68421	0.357	2.10526
1345	0.325	0.387	5.05263	0.373	3.57895	0.359	2.10526
1350	0.321	0.385	5.26316	0.369	3.57895	0.359	2.52632
1355	0.323	0.385	5.05263	0.371	3.57895	0.36	2.42105
1360	0.325	0.388	5.15789	0.371	3.36842	0.361	2.31579
1365	0.324	0.389	5.36842	0.369	3.26316	0.36	2.31579
1370	0.324	0.389	5.36842	0.369	3.26316	0.359	2.21053
1375	0.325	0.387	5.05263	0.365	2.73684	0.358	2
1380	0.326	0.389	5.15789	0.369	3.05263	0.359	2
1385	0.325	0.39	5.36842	0.371	3.36842	0.356	1.78947
1390	0.327	0.386	4.73684	0.373	3.36842	0.361	2.10526
1395	0.324	0.386	5.05263	0.373	3.68421	0.366	2.94737
1400	0.329	0.388	4.73684	0.37	2.84211	0.358	1.57895
1405	0.325	0.386	4.94737	0.37	3.26316	0.361	2.31579
1410	0.329	0.391	5.05263	0.374	3.26316	0.359	1.68421
1415	0.326	0.386	4.84211	0.372	3.36842	0.362	2.31579
1420	0.327	0.388	4.94737	0.37	3.05263	0.359	1.89474
1425	0.327	0.39	5.15789	0.372	3.26316	0.362	2.21053
1430	0.327	0.39	5.15789	0.373	3.36842	0.359	1.89474
1435	0.327	0.388	4.94737	0.371	3.15789	0.358	1.78947
1440	0.327	0.392	5.36842	0.372	3.26316	0.362	2.21053
1445	0.326	0.389	5.15789	0.375	3.68421	0.36	2.10526
1450	0.327	0.389	5.05263	0.375	3.57895	0.363	2.31579
1455	0.328	0.389	4.94737	0.374	3.36842	0.361	2
1460	0.322	0.389	5.57895	0.371	3.68421	0.366	3.15789
1465	0.325	0.39	5.36842	0.374	3.68421	0.364	2.63158
1470	0.327	0.393	5.47368	0.373	3.36842	0.362	2.21053
1475	0.326	0.386	4.84211	0.375	3.68421	0.363	2.42105
1480	0.326	0.391	5.36842	0.373	3.47368	0.367	2.84211
1485	0.328	0.391	5.15789	0.373	3.26316	0.364	2.31579
1490	0.329	0.391	5.05263	0.374	3.26316	0.362	2
1495	0.327	0.392	5.36842	0.373	3.36842	0.366	2.63158
1500	0.326	0.392	5.47368	0.375	3.68421	0.36	2.10526
1505	0.326	0.392	5.47368	0.376	3.78947	0.362	2.31579
1510	0.328	0.396	5.68421	0.376	3.57895	0.366	2.52632
1515	0.327	0.394	5.57895	0.374	3.47368	0.363	2.31579
1520	0.328	0.393	5.36842	0.378	3.78947	0.365	2.42105
1525	0.328	0.392	5.26316	0.377	3.68421	0.366	2.52632
1530	0.326	0.393	5.57895	0.376	3.78947	0.367	2.84211
1535	0.324	0.393	5.78947	0.376	4	0.364	2.73684
1540	0.329	0.389	4.84211	0.375	3.36842	0.364	2.21053
1545	0.326	0.392	5.47368	0.377	3.89474	0.367	2.84211
1550	0.328	0.393	5.36842	0.378	3.78947	0.365	2.42105
1555	0.328	0.392	5.26316	0.377	3.68421	0.366	2.52632
1560	0.327	0.397	5.89474	0.374	3.47368	0.365	2.52632
1565	0.338	0.394	4.42105	0.379	2.84211	0.363	1.15789
1570	0.328	0.394	5.47368	0.377	3.68421	0.368	2.73684
1575	0.324	0.396	6.10526	0.377	4.10526	0.369	3.26316
1580	0.331	0.395	5.26316	0.376	3.26316	0.366	2.21053
1585	0.328	0.397	5.78947	0.377	3.68421	0.367	2.63158
1590	0.329	0.399	5.89474	0.378	3.68421	0.366	2.42105
1595	0.33	0.395	5.36842	0.377	3.47368	0.366	2.31579
1600	0.328	0.398	5.89474	0.379	3.89474	0.364	2.31579
1605	0.33	0.397	5.57895	0.381	3.89474	0.366	2.31579
1610	0.331	0.397	5.47368	0.379	3.57895	0.366	2.21053
1615	0.329	0.397	5.68421	0.379	3.78947	0.363	2.10526
1620	0.332	0.4	5.68421	0.378	3.36842	0.362	1.68421
1625	0.326	0.397	6	0.381	4.31579	0.366	2.73684
1630	0.326	0.398	6.10526	0.379	4.10526	0.369	3.05263
1635	0.329	0.398	5.78947	0.381	4	0.367	2.52632
1640	0.326	0.397	6	0.381	4.31579	0.368	2.94737
1645	0.329	0.397	5.68421	0.38	3.89474	0.365	2.31579
1650	0.328	0.397	5.78947	0.381	4.10526	0.367	2.63158
1655	0.327	0.401	6.31579	0.383	4.42105	0.368	2.84211
1660	0.329	0.399	5.89474	0.381	4	0.368	2.63158
1665	0.331	0.399	5.68421	0.379	3.57895	0.368	2.42105
1670	0.328	0.402	6.31579	0.38	4	0.367	2.63158
1675	0.327	0.4	6.21053	0.383	4.42105	0.365	2.52632
1680	0.332	0.397	5.36842	0.382	3.78947	0.367	2.21053
1685	0.329	0.399	5.89474	0.383	4.21053	0.367	2.52632
1690	0.326	0.4	6.31579	0.381	4.31579	0.366	2.73684
1695	0.327	0.401	6.31579	0.38	4.10526	0.369	2.94737
1700	0.327	0.4	6.21053	0.383	4.42105	0.368	2.84211
1705	0.331	0.4	5.78947	0.382	3.89474	0.37	2.63158
1710	0.328	0.397	5.78947	0.385	4.52632	0.369	2.84211
1715	0.332	0.401	5.78947	0.382	3.78947	0.37	2.52632
1720	0.329	0.404	6.42105	0.386	4.52632	0.371	2.94737
1725	0.329	0.4	6	0.382	4.10526	0.369	2.73684
1730	0.331	0.398	5.57895	0.383	4	0.371	2.73684
1735	0.33	0.401	6	0.385	4.31579	0.374	3.15789
1740	0.333	0.403	5.89474	0.384	3.89474	0.371	2.52632
1745	0.33	0.402	6.10526	0.386	4.42105	0.369	2.63158
1750	0.329	0.402	6.21053	0.387	4.63158	0.37	2.84211
1755	0.33	0.402	6.10526	0.384	4.21053	0.372	2.94737
1760	0.326	0.402	6.52632	0.385	4.73684	0.37	3.15789
1765	0.327	0.405	6.73684	0.384	4.52632	0.369	2.94737
1770	0.33	0.402	6.10526	0.387	4.52632	0.37	2.73684
1775	0.332	0.403	6	0.385	4.10526	0.368	2.31579
1780	0.332	0.403	6	0.384	4	0.371	2.63158
1785	0.332	0.403	6	0.389	4.52632	0.373	2.84211
1790	0.33	0.405	6.42105	0.385	4.31579	0.372	2.94737
1795	0.332	0.402	5.89474	0.388	4.42105	0.372	2.73684
1800	0.33	0.406	6.52632	0.388	4.63158	0.374	3.15789

## Sheet: result
KLP-12(M) Basal ATPase activity
ATPase rate ( /s), 1st	0.0039
ATPase rate ( /s), 2nd	0.0049
ATPase rate ( /s), 3rd	0.003
mean	0.00393333
SD	0.000950438
